# Supplementary material
Source: Research Square preprint supplement (doi:10.21203/rs.3.rs-9162455/v1)
Supplement: Supplementary file 1 [file e237a10fbbec6200ca812986.xlsx]

## Sheet: Additional File 1
Table S1. Species and genome accession number used for maximum-likelihood phylogenetic tree
Species names	Accession number
Erysiphe pulchra	GCA_002918395.1
Erysiphe quercicola	GCA_003957845.1
Erysiphe necator	GCA_024703715.1
Golovinomyces magnicellulatus	GCA_006912115.1
Golovinomyces cichoracearum	GCA_003611235.1
Phyllactinia moricola	GCA_019455665.1
Pleochaeta shiraiana	GCA_019455505.1
Podosphaera xanthii	GCA_028751805.1
Podosphaera fusca	GCA_030378345.1
Podosphaera aphanis	GCA_022627015.2
Botrytis fabae	GCA_032594075.1
Phlyctema vagabunda	GCA_045999785.1
Rhynchosporium graminicola	GCA_046529785.1
Blumeria hordei	GCA_900239735.1
Blumeria graminis	GCA_900519115.1
Podosphaera cerasi	GCA_018398735.1
Erysiphe pisi	GCA_000208805.1

## Sheet: Additional File 2
Table S2. List of all predicted candidate effector proteins. The table lists all candidate effector proteins with their identification number (Column A), complete amino acid sequence (Column B), protein length in amino acids (Column C) and their effector class (Column D) Protein sequences were predicted by MAKER2 and effector class by EffectorP 3.0
CEP_ID	Predicted_AA_sequence	Protein_size_aa	Type
CEP110_20.16	MYLTRVFFIALLCGVMAMPTKNVVSDPAKVAENSSQETTKEIFSSNTEFVGKIREHSISSSPLTNQTDTTTSETTTTIVSEFKQGAKIPNRASLSTNNLTRVLVLDTHNKKLAKRSPFGTASVRKLLRCFRFDDKRADHEDYNTNRKQGSWRFSKEHHKGWIFKIFR	167	Cytoplasmic
CEP110_3.224	MHRCGRRHDTATVTLLIYLTLSPIANSSRLIEALISHGVILVVTSNRHPDDLYLNGIQRKSFIPCIDLLKSHLTVINLDSDIDYRKVPRPSSGVYHTTLDKNAVSHAEGWFTYLGDPNQAAAHSEIKRVWGREIIVPRVSGRAVMFTFDELIGRPMSAADYMELTKSYDSFIVTGIQAMTYRERDLARRFITFIDAVYEARSILVLTSAVQLNQLFLSKEACRSKKSKCEKQLSSKNEVQEAETTRDLIDDLGLKMEDLKNSSIFSGDEEKFAFARALSRLSEMESKEWMERKLGTKNKKSYQIKK	306	Cytoplasmic
CEP110_42.93	MRSPQGSPLPPLLFMLYISTLFEDGTSNSRFGYVDDISVVSVGKNPCEALEAAQEEEDRITQLSLTHKIQFDASKSELFIIGGGPKKRLDISNFIVQNGEQHIAPSPQIQWLGIWLDSQLKFKQHVQDWSSKAQRISNFLRSMNKVQRGAVNACVVSTSLYGAEAWLLGLTRITTKRDKKVSTGVGWHTKLVDRTILTAIRAALPILRTNPNIVLHCESGILPAKIILQQIQFRSIARIRLFDNYDPLSSRANETPKDAIKRLKLREGQNERVFRVPERYQTLPQT	286	Cytoplasmic
CEP110_50.164	MRALYLQSGLPLKLWPLILTASIDCLNITPNKIAPKSPYYAVYKKFPIIQNLHPFGCRAFWLDPDYNKLKSKAKEGIYVGTEFIGGHIILNTKTHRTVVRRDVCFHENSFPLKSNILAIHNIDRQNINKALTGNRADQWNKAMDNEISNMTQKGVWSLVPKSEAKGKIMTGKWILKEKPDGELKARWCARGFSEQFAGDTYADVLPPTTLRMLLAYAATHKLIIRHVDITAAFLHAPIDQPIFIEQPHNREHPGDLVCKLQKAIYGLRTALKLWQLKLRQVLSDLGFKPLKNDANVFRKGKTIISTYVDDFMILSTSLAHIDKTVIDLANFFKFKDLGHMTNFLGINVKNEPDGNRINKTKSRLSVVIWGWLYVEEQTHQLLTKI	385	Cytoplasmic
CEP110_50.171	MELLIFITFCLKLSWTVLSTSEAVDRTLSKLNPDLDQSSVEAADITQNGVHIPQDGAIVIWVNIGGDHNPKNINPPMPMKSYGMTHNVVVGGKKGLIFEPEQIQASVGDMVIFQFMSKNHSVTQSSFDKPCEQMDNGMDSGFIPNPDDAIYPAPQVAMQVTETKPLWFYCKQSTHCGKGMTFSINPGPMGSGKTHEDFKAKAMMSLSGKDSPPPYKDSPPPYKDMPKDMPKDMPKDMPKDMPKDMPKDMPKDESPPKAVLPPPKDAPPKMVKGSGESGGTCSCSCFCGVSSFPSMGSQGIGSFGGLPGALPMSAMRK	317	Cytoplasmic
CEP110_8.8	MKISIRTTACVLVTFLFSFFSFLVSAITVSYDSSYDDPSRNLDSIACSDGTNGLLTKNYATQGSLPSFPRIGGASVIAGWNSENCGTCWTLTYNHTSINVLAIDKASQGFNIAKAAMDTLTGGHATAFGRVDANYTRAEPSDCRM	145	Apoplastic
CEP119_17.190	MWLPSLLVVLLCFLHTVACAEDYYELLGISREATNTEIKRSYRQLSKRNHPDKNPGNEEAKQKFVKVAEAYEALSNEETRRIYDEYGHEGIEQHKQGGGRAEYHDPMDLFSRFFGGSNSFGNQGQRRGPDMEVQIKVPLKDFYNGHKTEFTIEKQHICDKCDGSGSANGKVETCKSCSGNGFQVKRHMLAPGLYQQIQVTCNDCRGQGKTIKHKCPVCNGHRVVRRSATFSLVIDRGAPNGAVVHYENDADESPDYEAGDLHVTLVETEPSLDENNELRVDGTFFRRRGDDLHWKEVLSLREAWLGSWSRNLTHLDGHIVALSRARGEVVQPGHVERVVGKGMPKWNENGDSVYHSTEFGDLLVEYTVVLPDQMENDMEKDFWNLWEMWRSRTGVDLQK…	416	Cytoplasmic
CEP11_29.179	MSLNFLLISILFSTFYSIVTAHFTLDYPQSRGLNEDEQDQFPCGGQNTISKQRTLYPLTGGAISLTMDHPKSNVQVLIAFESEPTTSFNTVLRPTFTQYGIGSFCMTNINLPSSLHVSEGTNATIQIITNGDPDGGLYQCADITFGISAFDFEVCQNSTGVTTSKDNLRGNANETSLDGQKSEKSGAIHFWPTYLSYIIFPAIFTYAKILF	211	Apoplastic
CEP11_3.17	MRALHLQSGLPLKFWPIILTASINSLNITPNSVASKLPYRDVFQKIPNVKHLHQFGCRAFWLDPDQNKLKSKTKDGIYVGTEFTGGHIILNPDTQRTVVRRDIRVHEDSFPLKSQILGVQNPNRCIIELELSGPKAQLWSKAMDDEINNMVRNNVWTLVPKADANGKLMTGKWILKEKLNGQMKARWCAHGFSEPFADDTYADVLPPTTFRMLLAFAATYNLHIQHVDITAAFLHAEIDRPIYIEQPHTREQPGNLVCKLHKSIYGLKTAPRRWQRKLRQVLHNLGFKPLKYNANIFRRGQTIISKYVDDFMILSVSTTQIQHTINALANAFQLKDLGNMTKFLGIDVERKSDGIYIDLQDKIDTLCDEMDSTWGNNTTPKGTSGYLFLINGTPIARSS…	409	Cytoplasmic
CEP11_58.17	MHTFTVAFISTLLLSPISVMSHFQNKDTDVDHLQSPRPSDSLTVSIMIKYDGEDRAKTCRVRKEDEEEEEREEKGEVKEENEEEEEEEEEEREKINEKKKGKKKAKYICHKVHRCKKKSKLCYGDSIKAKDGFRCDGKFIKFTKVLSRANGACDRLKSKSDRKLPALYTATDYKLADGPYFEWPIYSKFWNLGESKTNLAETIRN	205	Cytoplasmic
CEP11_59.30	MRSLLALFVTSLLLLDPVYSKVLPATDHHLNSRSGIARILVKEDFFEQDSEATGVCLKHEAPCPFKRNLRYGFKCKNKFFNKAKVMAAANRACPLIESNRQSGGFPKPHIDRKNSEKDGLLEWPINKTWWFMGLFRSYQHRLLMTTDCVVVGATTRNRKGEGYTDCKQRRH	171	Cytoplasmic
CEP11_75.8	MRHSSTHLVVAFCTGMAVSAAPLSPLPPASPAALSPLPVLDAHPIIPRADSHDFENTYNLSDAEGIRERDTTGEGVNDSAIMQSEAKDMSAEDFSFEVDPGEESDIERRSAFSIYNRSPTPYPQNIEEDEDQDFNGAENDNDLASVASFSESPEEEDGVSSAASDGVFSAASENVDPELEASSSDVPNKEENEKRSVETGDQSERHGGRTYITESEWRV	219	Cytoplasmic
CEP132_7.0	MFNLSSSLIILALLFTTIFAAPLNISMGAYSPALVVGDGSFSFSGGDTAAKLINSLEGAAIDGTGADANAAGGTNKGVQAGVVPAAAPSGLEGIGRKVVSTDNKQ	105	Apoplastic
CEP135_16.14	MRALGAWLASSCQPLQAFSLSRAAQYQEPEIEEIKELNNALSIQKNNPESGLKYVNLNLVDNLSVYVWVDGSLANNQDLTSQIGFVISVGNEKREHDSFTFQGNTIHWSSTKCKRVTRSVLASELYAMTQGIDIAIPLCASMNQIMTQLNLAKVPLIICTDSFSLYECLVKLGTTKEKRLMIDVMAIRESYERRELADIRWIHGKDNPADTMTKNKPTTSLQRLLDFNKLECRLQGWVERKT	242	Cytoplasmic
CEP135_22.10	MCGIPQGSPISPLLFLLYMAEPMRSGTTRACFSYADDIGILGIRPTIADSTATAQREVDRVLDWAHGNAIAFDSKKSEVVQFKGRRRNGSTKIVVDGVEISATN	104	Cytoplasmic
CEP225_5.149	MRPISLSLGAFLYMIIGQVKAQTSTDCNPIEKSCPPNPGLGTSVFADFTSGGSDYWKPLQGTTVKYDPTEGAKLSIKTPTDSPTIVLTKYIMFGHIDMVAKASHGNGIVSSFVLLSQDLDEVDWEWLGGDNNNVQTNFFGKGDTSSYDRATHIPIKTPIETFHTYSLDWTAERMVWLIDGTAVRTVAYADPITKGGKIYPQSPMQVKVGNWIGCLDASNIQTQGTCQWAGGQADLSKGPFIMSVKSINVTDYGCGGEYSYTDRSGSWQSIKSTGKCDGKGTGPGIKSNTEPKSSPEKGTATTPSVQGAPAVNSTTTSVQGASAVNSTAPSPGKTTGTTSKTGYDKPGNFSVETSKNNVSEPILTTSDANGKSNHTFGKTEALVCIIGLGLGYLVM	395	Apoplastic
CEP232_21.94	MSKFTLALVAAVSAATGAGISAAIYTARNEIKNTSQSVPVTNTVSTKSSNTSTKVPVDPSGLFQYGFPGPVADLAKRQALTSSFDRRLRNPHWVAEHFTASSLKNSVADRKTSVFREDENIPEKFRGKLKDYARSGYDRGHQVPAADVKWSQDAMNETFYLSNMCPQVGEGFNRDYWSHFEDFCRRLVHHYPSVRVVTGPLYLPKKDTSDGKWRVSYEVIGNPPNIAVPTHFYKVIFAESGAKNGPVALGAFVLPNSPIPNSKPITDFEVPLETVERASGLEFATLLPLEKRRRLCADQVCSLVVKDFTNRQKSF	315	Cytoplasmic
CEP238_3.44	MIFPTTVAIASTLLLTLPVKADLYPRSSAVLSVDSKDYDRIIGQSNYTSIVEFYSPGCIHCRNLMPIYEKAAQKLAGLAKVAAVNCDKESNIAFCSTFGVTGFPTLKINKPRMTTGKPIVEDYQGARSVKDIVETLIDKIQNYVEKISQENIDKWIEDTDGALAILFTTKPKINPLLKALAIEFKGGIKFAHVQISESDKNIIDHFGIKKLPTLMLLKDKEESGRLLHDEEMKKDVLVEFLSQAVPPNPDPAPLKIEEKITKPVAPKVEVQKPIIFPASASPLVVFDKEDELIKTCLGLKTGTCLLAFLPESADKSILSLIDAMTQLTYKRKQNKRSSIPSYVIPESNPKYVILKEVLSLADKAEVIAINGKRSWWRHLTDVDFTNPSTVESSLDAWIS…	596	Cytoplasmic
CEP31_0.79	MLSFRGILRGALVAFFSLPLIIETFGAPLTDSTTSTTTHLEPRGLKILAALGAGGYLLHRKKEKKEKKKLKKELEEQGVRIS	82	Cytoplasmic
CEP31_0.82	MLSFRGILRGALVAFFSLSLIIETFGAPFTDSTTSTTTHLEPRGLKLLAAIGAGGYLLHRNKEKKEKKKLKKELEEQGVRIS	82	Cytoplasmic
CEP31_2.228	MLSFRGILRGALVAFFSLPLIIETFGAPLTDSTTSTTTHLEPRGLKLLAAIGAGGYLLHRNKEKKEKKKLKKELEEQGLHIS	82	Cytoplasmic
CEP444_4.13	MHFSILKLSLIVTAVTASDPCNFGLISHGGKSGQVGQLPDGQNRVGGGYSQAIYTMEDGAIKDSSGKGCVITPGVQQFQCDQGAEPTRGFTISENGILSHDGSPEFYACPASYSEYNLYTSPVAGQSKCVGISLVASNCYAPSKPSYGYTPLCPVCTPTTVTVTQTVYPTKAHYGYQHDYPYKPKPTGGYKHHKGGYYGPPAYKKPKYGHKYGHEKYGHKYGHKYGAPKKAYPPYYTHEYPYAQSQKDSKNEGESNSHDQKSENSQEAVQILPFLTLSPFAVTSIPTSEPNKPEPNKSLESSVRPSITQSLVT	313	Apoplastic and cytoplastic
CEP457_1.126	MKGTTVFTFLCYFGVLAAVPMTINKRDDEIVDYVKVIYSTVSRSDASTLPANATTLPANATENGLAEGCKPVTMIFAKGTGENGNVGDGNSPGPALISEMRRFFLGGDSEGSERYLNVTNDAANKCPNTKIIIAGYSQGAQLTHNAAEKFSPTTSSRVVAAVVFGDPNNSQPIGSISNSSIFSVCHSGDMICRKVGFNVTAHLTYSEDTPQAASFIMSRLK	221	Apoplastic
CEP59_19.21	MRALHLQSGLPLKFWPIILTASINSLNITPNSVASKSPYHAVFQKIPNVKHLHSFGCRAFWLDPDQNKLKSKAKDGIYVGTEFTGGHIILNPDTQRTVVRRDIRVHEDSFPLKSQILAVQNPNRRIIESELSDPKAQLWSKAMDDEINNMVRNNVWTLVPEAEAEANGKIMTEKWILKEKPNGQMKARWCAREFSEPFADDTYAEVLPPTTLRMLLAYAATHNLHIQHVDITAAFLHAEIDHPIYIEQPHTREQPGKLVYSTWGNNITPKGKSGNLFLINGTPIAWSSKKQSVTAQSTCEAEYAALTTLAVTAQWIRPLFNELFQKENTPIITDIDNTAAMITANSNKISARNQRFLMRQSTPMD	365	Cytoplasmic
CEP59_32.132	MYRLNFILFAIIFGITHNTSAKGPLYILEDDYNAANFFTEGFKFFSGPDPTHGFVDYTDLNRANDSGLAGIVDGNVYLGVDYKTMSPETGRASTRVESLKTYNKGLFIADIAHMPGGNCGVWPALWTVGPKWPRQGEIDIVEGVNLDRTNSMTLHSSADCIVSAGVEAPSSVLKNNNCNSNDAHEGCSTVVSDKNSFGTGFNSNRGGVYAMEWTSSTIRIWFFTRSRIPDDIYNSHPNPSSWGLPSARFIGSGCDIGMHFRDHHIIFNTTFCGDWINKVWSSSDCAARAPSCQNYVANNPRDFEQTYWLIKSLKVYQIRQPESIKERNFKA	331	Apoplastic
CEP59_7.13	MHTIFVFFIHITSIIFIYKTESHIFPIKINGAANNLKACAPPDPPDAGNRVSKSTSTLSKINGTAASKTRSTLYATDAFNKGTLLGKKLVVEQLSSDEQSADSEMDLEINKSPSNFANTDPFVEDFPQLPGTATLNKADRHTETGLTDEAKQCATSLKDAVKGLLDLTNSYLKDLEKDHPGVGTGFLALLTDGASRAMRGEQVYVNQQNIAHSNPKVSKVSWAEKSGTLENGQTISLKKQTIKASPPRGQSKEDRRVIIRLSLDHEARKAGSFQLRQQIQQLIPNKSLVNDVWSVPSGVAILAPTPAKAAELLQYKDAIEKRFGDASVERQETWTTFVVGPVPKRLRGIDGFYDPMDGLIQEELAPIRDEVPIRHVSWTRRSQNNDEPYGSVRICVPEI…	537	Cytoplasmic
CEP5_12.127	MVSFTRLVALAACIVPLFAIPATPGYGFHAKVRNLDTPNYIENSWIVVYRQDITDSQIDTHEKSIDSILTKRDQTKKVAHGIKAKWHMKSLRGYHIHTNEDLISLISASPEIEYIERDIRVSALELNTQSSAPYGLGSISHRSAQTSSQYVYDTSAGKDVIVYIVDTGVYAEHSEFNGRASMGANFVSGSANTDENGHGTHCAGTIGGSTYGVAKNVTIVGVKVLNAEGSGSNSGVISGINWVASNAGGSGVLSMSLGGYYSAALNQAVTSTVNSGVSVIVAAGNDNANAALYSPASAQSAVTVGAISSTNAKASFSNYGSVVDVFAPGVNILSAWIGNKTSTNTISGTSMATPHVAGLAAYLIGLENLSSPNAISNRISSLAVNGQISGLPYSTVNRR…	405	Apoplastic
CEP5_27.9	MKKIMKSAAQIFYLAFFSALRVSDCADSSSGSKTRGLGIEDCAKSSTATISDACTSFSTLDKINSELKDSISDITRNTDFFSHYRLNLFGKECPFWSDDNGVCGNVACAVNTLDNEEQIPIPWRAEELGKLQGPRVIHPIKKLPQNHISRNPTDDQHESEFRESCVIEDYMSDDRDYCISEDESIGYKGDYVSLVDNPERFTGYAGEGAKQIWDAIYRENCFSRSPYLDSKTSTTPTLPQRSAAKELKLALRSQGSLQTLERLQDKNPDATSFNTPVFVYESECLERRVFYRIVSGMHTSISAHICYDYLDQKSGKWSPNIQCYKERIHNQHDRISNLYFNYAIVMRAIIKLGPYLNEYAYCSDDAIQNFITKKKVQSLLDKASAMPQVFDESLMFVNE…	572	Cytoplasmic
CEP5_36.5	MLAHIIIEISLLTIHVLAHTWVETVNLIAVDGSIKDVGFMRGFGGRVQGVDPDKTNTYLLPPNGRGSGNEILPTDLMCKDTQVKHVQSEGFPRLSASPNDRVSLAYHENGHVTKFALTDGKPSGRGTVFVYGTKHSLPTDTFLGIHRVWNTKGTGGDSRGKLLTTRPFDDGQCFQPNDEKLSKTRAKALGFSNPADSPEVLCQHMVKLPKNAGTSGIFTLYWVWEWPTLDKSGNIFKNESYTSCIDIKMVKNSGIHSQEPKSKNECEDEKEETDKKASANKTNLECMTQDKSNTKNSTTANNDDGKVFNTVGIKTEKNEKNKANTFAVQSQLESEEQITVDPSMAPQIASDNPPTQAGLGSTAAQNSTSSKTSFSSEKIAHKSFMKMMHSSKIDAVLPN…	450	Cytoplasmic
CEP65_20.4	MLFNQCVFLVAASIKISSNAGDQEIGLSAPEVENVLRSGGFVKEKNNLPGENRWCFTSCSQAFNCKNDLYKAWKKRNQQLGAQDFIFNSNEKVTYESTKFSHSPRRFRAIFKALRPEKKQELLFMRVTRAHTKIESWRAISEKRRNQVYNDATFKTSFHGCMKMWESEGLKFNEECDKEMLIQGIDAGYISLTGINSCLSTDEKSVLKLPMPDGMELSLSRNHYYYQDNSKRYTFIAWRGKVYNFQFTLDGKVIGSFIHEDQHANSFQNDIGYNDILSLTSPVSTSCRVLEHGTSVLPIELYLKQKRIQYAGFSEKQPAKEAVESAFERIKLSACGRENIRSRQKRGDLAEWTEICGKETDKRRQKEILNIASFQQWEIIWRNHTPKQHLRHRAPADPE…	544	Cytoplasmic
CEP65_3.15	MLRFGLFSLAALAFTATAIIEPCPIQFNARVASDSKPRDFDVKTSIFETDEVIGEGLKFSEILSMPKVERSLFDVNAIPIEVSISDKSIFNNQIGFRRVELLPKSVTGDDPSSEGIKTIHFSVKADSLKKIDLAHEYQLAFMEDNDFSTNQWVLKTGTIAGLKQDPHDLVMMGNVKNGDILFTTPFTEGVFHNFALTLDFVDNHISVYYSKGLDPLQNVLTRTPNDLTGRGKFHFGMLKKGISSGPGDITKNAFQPSGIDEGMIFGGIFQEDSIDGCVSTSPK	283	Cytoplasmic
CEP65_32.136	MNFILLILLASAALPQAHPNVFSIYDDLLAFPQYEIIFPESFISDNEASFLISQKSSDPLVSDLSKYTSGSSHQDIEEENPSSRPLSTSHESYELLHLQGVPHLCSVPIIAPPSPNKTNEHDARTAERQELARATERAWELLQGLEGSCLYFVSGWWSYSFCFNSEVTQFHHLTLQPGKQEPPKRDPTTKQFILGKAISTKDSRPQSRRQANGLMDMHGGKQTPKLELRYKGGTRYLVQKMDSGTICDLTNKPRRIEIQFYCNPSLTDRIGYIKEVTTCSYMMIVYTSRLCSELEFLPTTENKNHTITCRMVVPEEDLSDKNELKILEAVIQASRLQIMKENESPQTVGGILVGGGKWINSENQRMAIPEIFGDNVIEDEDKPVEAVPHSKSKVKSSHG…	474	Cytoplasmic
CEP6_2.17	MIKAVQACALSIAFYGAEAWWPGISRITAKRDKKVGTGVGWHTNLLDTTIMKAIRAGLPVWRTTPNVVVHRESGIPPATILLQQKELLTAACIQRQDAWHLQVFRAKVNLKETVSRLKLRAGQKDRSFNVPERYLKWLQMSFRIIPPAEGSENFIFPRGEPKIQSMEGDKLDEKALEKQWMFSLPSDTVFAYSDGSACGPAR	202	Cytoplasmic
CEP75_5.132	MKVSFAPLVVLFVSTALVDAIAEKPGQRSSSPAMEKSASEMNVKEADASKDFEVKSEKYRPEHAEPAPVLAELNADEKADSVEHIKAVDDNKNVDNIKSDDDDEKDDDNEKLGNVKSDDDEKVVNVKPDDDEKDDDDEIDYDEKDDDNEKLGNFKSDDEKVVNVKPDDDEKDDDDGIDYDEKDDDNEKLGNFKSDDDEKDDDDENFEDITAPDDEKDIKNTETADDELKNQLEESVISPDDEETTRNYFVSTVYTTITSTVTDCESTVTVCPEFGSVVTKTISLYTTICPETTSMPNVPLITAPAVPDTSKVSYLTKTVETTLWYTVTECPPQQADCVVGVEKSSVATYLDVQKVTYENTHTVNEDDSYPTTTFSKPYVTGYPSGKIPASKSNVTMPVV…	436	Cytoplasmic
CEP76_3.162	MYLFMGSIIALGVQHFAGGHSEPKPARADKIKNWTVPRNQINMRSFLAAVGITKSWVKIFSETARPLSRLGGKVPWQWTSTEQLSFEILRDICASSTEKCGFDPSKPVVIYTDASKFAIGCVVVQMHDVNGSSIPKPVFYDSSMLNKTQRSYGTYKRELLGIYTFAKKYSYMFSAHRGKLMIDHKPLTTFLGSLNVEGIYARWAAKLILLNSDTLYISGSRNQIFDALSRTIFLDPDCEADENLNSLGLIDDDKGELKWIWKDGAGGYAEFLEK	274	Cytoplasmic
CEP77_77.100	MRGSSLFTILSLCLFSNLSAAESTCGPKVGSCAADECCSLAGFCGKSPDYCVSPECQFRYGPACDANRIPAGTNTTSIPRTAKGNIVYGADGIYDCSTAGDVALTFDDGPGPYTSHILDLLDKYNAKGTFFISGNNNGKGAIDTASLPWPDLIRRMYRSGHQIASHTWSHADLSKLSSNERLNEMIKNEMALRNIIGVIPTYMRPPYSSCSAESGCQADMKDLGYHITYFDLDTQDYLNDSPDQIGKSKTIFDNAFVGKSNTDSDFLAISHDIHEQTSEQLVEYMLHGLKSRGYTSVTVGTCLGDPKDNWYRPDGSPRTRHQKI	324	Apoplastic
CEP97_8.16	MSSVTIAVTLLDLIAVSASCITQDTKLTAERPGSAPNSCGCTTLYFIANQDIRFATSRSSPLPKLESRDIGRHPLGLVRSRPVFGSSTTSATSKGVGKYTKPPKPYASTSYERTPVAPLPRQINPNENKAKISKTFANVVMTPANKQHTQAPPKVVTAKSDNKTKIQTNSKPEDNRLLVRVSPGHPVLSSSPYAILLELNNFLKEKLVREIQRTKTGYAICPVSAEAQEKLTARMGEIEASLSLKGPVKVEKPVQQAAY	259	Cytoplasmic
CEP9_52.102	MRALHLQSGLPLKFWPIILTASINSLNITPNSVASKSPYHAVFQKIPNVKHLHPFGCRAFWLDPDQNKLKSKAKDGIYVVTEFTGGHIILNPDTQRTVVRHDIRVHEDSFPLKSQILAVQNPNRRIIESELSGPKAQLWSKAMDDEINNMVRNNVWTLVPEAEANEK	167	Cytoplasmic
CEP17_12.21	MRNLEKLALGLVTGVVATGASEVTSLTKDTFKDYIKDNDLALSSRGHCKALAPEFEEAATKLKERSVKLAKIDCTEETDLCQTHGVDGYPTLKIFRGPDNVKLYSGGRKAPAIVSHMIKQTLPAVSILTQETIEDFKKADQVVTVAYFDAEDKTSNSTFDTLSEKMRDTHIFGASNDANLAKSEGVTAPAVVLYKSFDEGKVIHTGKFEEEEIEKFINTASIPLIGKIDPDTYHNYMFSGVPLAYIFAMTEDERLSLSNTLRPVAEKHRGKVNFATIDAEAYGSHATNLNLKADKFPAFAIHETVNNKKYPLHHETEITAESIDDLVTKFIENKIEPSIKSEPIPESQTGPVTVVVAKTFDEIVMDDTKDVLIEFYATWCGHCKALAPKYEILAKLYAD…	506	Cytoplasmic
CEP17_17.15	MFLSVKIIAVFYFIFIGVVVSAYRNIYVRASLDFDPDDVKDTECGDPNAKIDSHDINVAILGICGGIAGEIQKCQGNPSSTEGRSKSALIQLSPVNPEATINVSKGRIERCLRAARAACPEIGFRSTCKLGTTDGDLNFSLKAN	144	Cytoplasmic and apoplastic
CEP17_38.0	MKFSSIALLATMTLALAQPHNHFHHHHARHGSQTSELDVAAEIHTDDAVVTVYELEGQKISHDEVESCLEESKCVMVDNQSKSASTEINTAKSTGHESTSKIIADSERPTPTASVTPPASSEVLSKTPSFKSDSPIKNDSKGIKNADDPPKPNNLAKLKLNFPSGKIDCSHFPSEFGAISADWIGHGGWTGVQKTPGYSMSSKVISYIETATPGEGCIPGSFCSYSCPAGYQKSQWPDAQGSSGQSIGGLYCNDEGKLELSRTASRQLCTPGVGDIKVKNSHHKNVAICRTDYPGTEAETVALDALPGSTVKVTCPDSKEYYRTWEGAPTSAQYYVNPSGYDVKDACTWGTPGSNIGNWAPVNMGVGKGDSGSTFVSLFPNTPTNPDGVLDFNIEITGD…	435	Apoplastic
CEP17_47.159	MKFISSLTALTLIMTAVSSPLPQDSENGPGSNNASVLSSKTYKELQISDGVAGNAKQEAAARFEGIDRENLASVSDADVKLIKGIHNVAENAELKAFDPAIDKATGSELSALLIGRTKNKVLKASATVLQLQIRMAKGEKIDPADFEIQKKKMDGNIALDEKLNGQISQGVEFNGSS	177	Cytoplasmic
CEP197_18.11	MRVECGVPQGSPLSPLLFMLYIATLFEDGSSNCRFGYADDIAVVRVGKNPHDAVEAAEEEVDRIIQLALTHKIHFDASKSELLVIGGGPKKRLDTLNITIRIGEQQITTSPQIRWLGVWLDSQLTFKQHVQEWSKAPGELRQSSHTRATARAKCNKKEKAKQFKIWLRNLPAGTLCVYSDGSSSGPAVSAYGYAVCKNGEILASGGKLPLGSEVYDAEIAGAIRGLETALEIGDSTGIKLFATSSQKFKELCSTHYTVEVRWIPGHSGIYGNEKADTLAKRALASNTRIRNIPASENVSRENQYTLTFAALKQQVTIGSQKLVEEWWLKNRTARYEELDLLMRRKRPPELDLTRWAYHRLIAARTGHGDFASYHRRFKHQNADILCKCGREKRPWHFAE…	445	Cytoplasmic
CEP230_18.9	MRLQIFTLLLPLAVFGYDSEPITLTKTTTSTVTQTVTVHIIPSALPPLRTNVTLPYDKIHVTASASLPAPSQVYVNKNNTNMVDSPAPAPKGTTPIMRGNGSKNLISKKTLLAAASIITLVTAW	124	Apoplastic
CEP230_19.30	MRHSTAHLVVAFCSSMAVSAAPLSPLPPRSPALISPSLTSRSTEPEDLESKDLEPTVKKRSVGGFAYHTADGSAISKRDDSVNKGVVKTQANRNFVSDSDSDSDTSSSSDSDFDKRSIPALAIRSPHSSPQEQGRDKNNEQADESSLQDISSIQAEESGDGWESDENAADFESNSIASDDENFVDETSANNDKVETNTKTKRNVEFIA	208	Cytoplasmic
CEP230_21.7	MRGKFFLFAAFVCSVYAHGDGVEGLPQLMGARKFLSTLKSRNLQLSVDTIEHKSDQVAKERVTSDGRCGPGIGSCTNCCSAEGYCGSGPDYCISPDCQYQYGPLCHANIKPAGPSTADVPRPLVGSIPYGGAGIFDCVTPGTVAFTFDDGPYLYTEDILDKFQRYNAKATFFITGNNLGKGPIDSTPAWTKAIQRMVAEGHQVASHTWTHQSLDKIDSQTFNHQVYYNEMDFDVDTAGYLNTDVSRIQKSKDIWDSTIAAADPATSNFLEIEHDIHYQIAYNLTDHILDSMYSKGYRSVTVGECLGDPPANWYRKGN	317	Apoplastic
CEP27_92.132	MTNTGISQGSQLSPILFLIFASTLPPLLRTPKSASVGFVDDANILNWSDSTEENCRTLENIHEICEEWAAKTESYSLTKNINQYTSLERPKGINSKHHSKFKDIKLAPANQSESLESIWTQNYTGEPISKRLNKEPKLSCDQLPASHILYGEQPFTKLRRYIWQ	164	Cytoplasmic
CEP289_16.6	MKTYNTLYLLALLGVSIAAPLQENVASRHQARSGALGSVQTNLMNTGSSQPSNSILDLSNSYQVTEDDAEDQDNDDEDEIDSRDPLIQSALRRNIAVLIRGQNSVNDQTKLLKRQHNGGGEGRGDGRGDGRGDGRGRGNGGIGGGGRGRENNNDRDETEDEDGQN	165	Cytoplasmic
CEP289_21.39	MKVHILFGLLGLLGVCIAAPLSDKKESLEVTSIDNDQLENSISSFPHSERKNTADNFDVAVRDKRLNLLKKRQGGGGGGNSGGGGGRGGGNGGGGGRSGGGRILSRREQDGLIGGGEGGIIGKREQDGLIGGGEGGIIGKREQDGLIGGGEGGIIGKREQDGLIGGGEGGIIGKREQDGLIGGGEGGIIGKREQDGLIGGGEGGIIGKREQDGLIGGGEGGIIGKREQDGLIGGGEGGIIGKREQDGLIGGGEGGIIGKREQDGLIGGGEGGIIGKREQDGLIGGGEGGIIGR	293	Cytoplasmic
CEP67_23.8	MRFNQLRQVFLSCILTVLGYGSVLRSDKLGAQQMIHRCQKLQNQIVLAITGAYFGSSSKALELEAAILPAKIRLLKHSYQYALRILKFQKTHPVHQLIFHLLQDELVFSDETDLGLFQQVSETKTQSQKIGGLLGILAKDLPLERINDQWSPP	153	Cytoplasmic
CEP67_4.200	MLFQSLFAGLAIAQLAAGHGAIIKATVNAATPRDGANRNPFQTDSTRFKNNNVDACGETLGGGPNEPTEQVAKVAQDSSGLPMISAGGMVMMTLHQVNGDGAGPYKCMIDATGTGTGGWTDMEVVTNVPGKNSRSKAKAEDFPLTAKVAADQTCTESMGGMDNICMVRCNNGANAGPFGGCVPVQMVSAGAGAAEEATPKATKEEATPKAEKAARGFSS	219	Cytoplasmic
CEP67_46.56	MFFILMALINLPVEAIKLQPAIFNQSLAPDATEPLQSNISARGQTTETYTQLSNPPVNTLAKATDEALDEVRQMFFKREGIAREYSKALDEATGRLREMGLENLTGNLTSAIARVLQQFARGDISLGKGNQQQQIDFLSQDVSGQMRNRQMPTYAQAVRNQTTSNTTLNLPKKPVSLPTSQVRQTQKTDNRIFIRLPEDHHSRTHHVHAVKSALIKKLELQHDSLKAVQKVKSGLALVPSNEKQAEQIMTKTQDIVATLGGLVERAEKWHTYIIDHVPRKLHSLDGTKWDVTENYAREEIQAVSGSLPVKVAWSRRSNDTRAPTGTIVASFKHSEPWILSQRENKVTKTHTDYLTFSPLDTWDVRPRVMTHVKKSGNLHPAQIRPTSTADICWIKISGA…	681	Cytoplasmic
CEP10_15.6	MNNRCYSTIFLLCTLFSVNHSKTKIKISASFINLISASSISSLKDRIFDINTGEGQVSMNTQESHLANETSSQTQPTEQIEEHALSQRRGTAEVERDNSDENYDPDQDLEERRILRKGLRDLSKILVENRSEYMNTDSNGLEETITRANKISRQVKQTSDATIDSHLLVTAADITYKRTVAIVSGESSQCIDLDDLIHRCKLFMRQGDNDEAVRILSTQENRLVRNDDEEESDDNEDETLNWEYLGRYACFQHLSRPCVPGFLLGPLATEKKAKRIVARKAAFNISSLKESRPEVLHEEDIVRDEDLNLSTMCQKITTLLEKVRADAMAAAELETRDDMTDQEAEALLDKYYLSREAGIALFKFVINPFSFSQTVENLFYVSFLIRDGKMAVTVDDRGM…	462	Cytoplasmic
CEP10_24.26	MRALHLQSGLPLRLWPLILTAAINILNITPNRVAPNSPFHTVFGKMPKLKDLHPFGCRAYCLDPDPNKLNSKAKEGIYVGTEFSKGHIILNPNTDRTIVRRDIRVNEDLFPLTTQILVLRSGNRNSSKEILFGSRAKEWSVAMENEMENMAHNKV	155	Cytoplasmic
CEP110_11.6	MYTTPIIILLLTTLVEARFGQEHPKAIQDIASLSDSGKPGLPATIAGNTIGDLLAAANPCEKLKDADEIIEKLGDSPENIAAARELTAAEINFNPFATSTPSICADPSLPKTEALRGVVPLIDPAVGGSDLENKNSAESVKTPFDAKDLSQADVMVAHGFTNFTAVKADGTKVEATSLDSAKTSDGASANSVDKQNDKKEENEKAEDDSKASSAASSTDDKKNDSKASSADSSTDDKKNDSKASSAASSTDDKKNDSKASSAASSTDDKKNDSKASSAASSTDDKKNDSKASSAASSTDDKKNDSKASSAASSTDDKKNDSKASNAASSTDKDSSNKPDFGKCTPTMVFQAGVNGRKATEFTFQASDPLVSKGQQEALNPNIIANRIKDQLTNVCEANQ…	443	Cytoplasmic
CEP110_47.162	MPERRPTSGRPLLIISILQAIAEHLQHGTTLPSNLSNSWVKCNFISYNRHTFRVIDQKLLKILHYDKLISELIKLHENLAHCSIGTLIRESRRNLWHPDIVLAAQEAYKTCPRCQLMTKPIDIHKQGTLHPVQAPMPFTRWGMDHTGPIRHNNQSFHLCTAIDHGTSYAMALLTNSPNSASCIELIRQIHLLFGIKQLITDNGQAFLSTEMSSLCKENKIEQNFTKPYRPETNGKVERFNGIIKTIFYAISSINQSRSIQWVLDQSLSTYNRRPNLTGYAPIYLALEITQEYSSSPYIRELTPTEEAAFASDIVKIYNPGTQYARLNVANGKAARDEVRSYLQEKKARLRVFGKGDWVLRQRKRNHKDEPFYDGPFVIAETNSNNAYILRTPGGVTLQN…	455	Cytoplasmic
CEP110_6.5	MICLCWLFFLTVCPITINAYKATATWYNTGLGACGKTSSDDQLVVALPASIASSQCFRTVYLTNAARPIGPKIEATVVDKCMGCNNMDIDLSPAAFKKLNLGNLNAGKIWVEWYVICS	118	Apoplastic
CEP110_76.144	MRVECGVPQGSPLLLILYISILFENCPSNCRFGYVESAVGRVGKNPREAVEAAQEEVDKITQLALTHKIKFDASKSELLIIGGGPKKRLDTSNLTHVQEWSSKAHRISNFLRSINNLQRGAAPGSLIRAVNACVVSTALYGAEAWLPRLTRITTKRDKKEITGVG	165	Cytoplasmic
CEP110_12.153	MKGHNTQNISVPVSIIASLLIQICSVHAQNTIGRPWKPLIIYDNELDDNLNPKLFWNSFASIQKHFLMLL	70	Cytoplasmic
CEP110_29.27	MKSTSLLLVLALLTALLCSSLPSTAHDILHHEASFSGEPSRKIVRDPRKGRQTCGRPGQACSGG	64	Cytoplasmic
CEP110_37.60	MAMLSMMIIIFTVITQGALIPPESRGTHDDSFLKVKGEFFQAISVISFGSYK	52	Cytoplasmic
CEP110_45.70	MFIQVSIAIMTIAQVIVRATTPPACLIGAIGAQSNPADFKAICGNLQQQVISKIAERCADANMHSAAMSAYAATCLSEASIDFGGRL	87	Cytoplasmic
CEP119_0.92	MIRLKIIAILKIILCSLIISTETHSISSHPASLQKRKILYVDEDEEYRCVKNVYTIQQVDDAVAAACDYVNSGKKTWGFSRWPKSYRPRDRSQFSYFSNTLRLWPILSNGKIFQGRFRNPGNNFVVIDGSCQLAGVVALFKTDPVFRGPCPIIGCHGRSSKDYKNCELIKLIEKKPSKSKDEKDHEDEEEKGEDEEEKGEDEDADEDEDADEEENV	216	Cytoplasmic
CEP119_11.90	MLLSSAVISALAIAVSASLNNATVYVTEIHTAYTTVCPTSTQFVYNGVTYSANESTTLTITNCPCTVLKPVYTTTSVHCTDCYSAVPTAPIFGNTTAVMPNPIGPKPNPTGALPKSGGDSVVGTGPDTTKPKASQSHITTSNGNRLLNFSGAYLTGFLCLLTFIF	165	Apoplastic
CEP119_20.112	MSKSLLLTTLFISNYLSAWNTHAPKADVCHRAPADPETWHAANITTDDKTGRMRIKFTETPSAIHQNLTRAQSSIAIQIRSEHVGLNAYLHRRKVPGVDEPRCQCGYPSQNAKHMVMVCPQWAQGRGDVLRKARNRTFEAMMDSPEDVARITLWIQREGWIEQFRLTRAVEAVMEEMGTGER	182	Cytoplasmic
CEP119_6.141	MFILSLISLWALFFAFRVSSTYVLSPDDVYQGNTFFDKFDFFTEIDPNLGFVQYEDRNTASNSKLTYVNNAQQVYIGVDYQNTYNVNDARGRPSIRIETKKTYQYGLFVFDLSHMPANTCGKWSAFWTTNKQDWPRWGEIDIIENIHESNVTMEALHTSPGCSLAGNQISNQMTGRQNTYNCDGAATSSSYGPQSPGQGCVAENTNPNSYGTSFNEVGGGVYVMEWNNQAIKIWQFRHENVPQDLSAGSPNPSGWENPVFTTAQGNCNIDEHFKNQRVIIDSAFCGNWAGQDVFWKETSCYKSDPAKYPTCNSYVANNPGAYKESYWLINSLKVYQNSPTNNTPNSQVAGTSDSKPSKNQNQASGSSSEAAHSTSDSLDTLSHKSTSSLIAAQASSRES…	494	Apoplastic
CEP119_18.91	MRQFLIITIFSAIFFTSTSCVRTERSTVRKIPAYDLRPQRKPTHGFECGIGFYNLINTDKAEDIACTRLKKPWYSRMFYKYPRKYNSKLRDKKDSDEKLYEYPLLLDKVYDAVRSEPKKKTFLIINKNCDFIKVISEKPCKPSKCPKKVQYERCKEKLAVHQDSREKI	168	Cytoplasmic
CEP119_25.85	MIQVVYTLLCILHGLFPSVIPPYKSSLEYTFRGTVSPSLSPLYSQQKNDYLRVCHCRGIFSKNH	64	Apoplastic
CEP11_18.147	MANVNLKLVILTFFFFSFVSVAFDFFEQMFNSHQVMLQFFQRHQQQHEPQNSPSDSSWYQKNYAGIQCNKYVCPDTLACVDFPHHCPCPHPQFEDKIEIVEGKAICISKGGFKAGEAARKVELARKGLL	129	Cytoplasmic
CEP11_33.146	MHTFTVAFISTLLLSPISVMSRSQNKDTDVDYLQSPRPSDSLTVSIMIKYDGEDRAKTCRVRKEDEEEEEEEREKINEKKKGKKKAKYICHKVHRCKKKSKLCYGDSIKANDGFRCDGKFIKFTKVWSRANDACDRLKSKSDRKLPALYTATDYKLADGPYFEWPIYSKFWNLGFKQKYRLIITQKCIIVGAVIRRKDASYTQCTFGPKKGWRN	214	Cytoplasmic
CEP11_60.3	MHTFTVAFISTLLLSPISVMSHFQNKDTDVDYLQSPRPSDSLTVSIMIKYDGEDRAKTCRVRKEDEEEEEREEKGEVKEENEEEEEEEEEEREKINEKKKGKKKAKYICHKVHRCKKKSKLCYGDSIKANDGFRCDGKFIKFTKVWSRANDACDRLKSKSDRKLPALYTATDYKLADGPYYEWPIYSKFWNLGFKQKYRLIITQKCIIVGAVIRRKDASYTQCTSGPKKGWIN	233	Cytoplasmic
CEP11_62.1	MRFSLAALASSFLLSSTLVHSHVLAPGFSSELGPNVVSIKVKIELSDEKSKDGDECDKEDGSCSDNKSDEDGDECDKEDGSCSDNKSDEDYWTYGSCKDKESSCRSPSTHKYGFQCGEKFFTQFKVLRAANAACLRISENSQRHSLPAAHTKFKFDMPGPYMEWPLNRYGWAFHRYRHGRERIIMTNDCTVVGAAVRFKKGKKYTKCYVKRH	212	Cytoplasmic
CEP11_63.133	MHTFTVAFISTLLLSPISVMSRSQNKDTDVDYLQSPRPSDSLTVSIMIKYDGEDRAKTCRVRKEDEEEEEREEKGEVKEENEEEEEEEEEEREKINEKKKGKKKAKYICHKVHRCKKKSKLCYGDSIKANDGFRCDGKFIKFTKVLSRANGACDRLKSKSDRKLPALYTATDYKLADGPYFEWPIYSKFWNLGFKQKYRLIITQKCIIVGAVIRRKDASYTQCTFGPKKGWRN	233	Cytoplasmic
CEP11_76.11	MHISNLSLFGLAIVVVADSQASQPVIDDAKSSGCNSLVVDCSLGYNSSMNKVTPQSPSPTGNFHEKSDLLPGKIPLSGDDQTEVEKTKAEGFMVDNDDDDEDDDDDEDDDDNKVDNKVDNKVDTKVDTKVDTKFNDQIDIKVEKISKDDQFDNEIDQDDDKDDDKDDDKDDDKDDDKDDDKDDDDDDKDDDEDDDQTIEDHRMPEKEIKMPGIYHQVPEEYILKTITITTCIPTVTTSVITLRKPGPTQDRPHYADVPMPTGWFPKPIDNKNKPELPRFTGAANVNQISTFLVFLVGAIAFLV	303	Cytoplasmic
CEP11_33.127	MSPGGIVAMPLFVMFVKMEAQPNTDKPFN	29	Cytoplasmic and apoplastic
CEP11_6.62	MRYIRAIIISSLASLAAANSVHFINQDSASRRVIFSSEDGSSTLQPIDIPGNSEAHQIFPVGWSGNWYSVSKGGANVPGMLGEVRFDGYNGATFFDVSAIVNPNDNEGVKQIFPASTNEPISGCQYFPCANVYKKSDDLQTLSTDSKDLICLLGNIPNHRRRGKRLVRQFIEI	173	Apoplastic
CEP11_61.149	MRSFTVLTSCLLLSAPVYSHVMSSSVHPHDLSDVESHMNPKSHVVQIHVDLGNSVWDTKKDNVCHKDDSPCSEKDDDCHEHDLSCSKKTTNRYGFKCKDKFFNQELVIAAAKKGCRYISKGTNSGKFPMPFLDKKYRAKGPFVQWPIKKNGKFVSWFKSDRYRLVMSMDCTVHNAIYKGSS	181	Cytoplasmic
CEP11_63.94	MRSIIISLISTLLFSSVPIQASAITPRDSKIDDLSALDSIHVKISVKIDGQRFDSESDNGCPEKEKSCSDKNKTVKVLSFTCNKRFFSQSKIFRAGKAACDQLKKNSDRRIFPAPYDASDFDTKGPYWEWPIRRNGRIWNMFSRSKYRIIITKNCTVVGAVIRRRDHSYEDCKAVSN	177	Cytoplasmic
CEP11_64.126	MRSIIISLISTLLFSSVPIQASAITPRDSQIDDLSALDSIHVKISVKIDGQRFESESDNGCPEKEKSCSGENKTVKVLSFTCNKRFFSQSKIFRAGKAACDQLKKNSDRRIFPAPYDASDFDTKGPYWEWPIRRNGRIWNMFSRSKYRIIITKNCTVVGAVIRRRDHSYEDCKAVSN	177	Cytoplasmic
CEP11_65.8	MRSIIISLISTLLFSSVPIQASAITPRDSQIDDLSALDSIHVKISVKIDGQRFESESDNGCPEKEKSCSGENKTVKVLSFTCNKRFFSQSKIFRAGKAACDQLKKNSDRRIFPAPYDASDFDTKGPYWEWPIRRNGRIWNMFSRSKYRIIITKNCTVVGAVIRRRDHSYEDCKAVSN	177	Cytoplasmic
CEP11_66.64	MRFLLHFSSIAALIFAHSPKEICTLPPNRLRITSIYFLYHDPHPKTHHPCQKTPVNRSSMTTLKTLLATRSLKLLKT	77	Cytoplasmic
CEP132_3.82	MSSRIAVFGLVFLTQVLSILSKAVEQNRTKELPLCSYQCGALTRSKIIKNCSLSSPKCVCRFMDSYTLCAAVRCRGRDFKAAIRAPMPVFMPEIMLVSDDDFEPICLNDKSVVDASLTYSSRKSNEDFKDKIKPSISGATILEGEGLVLTPDHKGGMVATASELNSAELSSDTKIRIARSRKSTTGSGGQSTKGSGGQSIKGKKNSAITTHPNTSVMNLGLLLFIIVALT	230	Cytoplasmic
CEP132_3.30	MNVTRKAPFISLIIALKVWTTATSTISFSSTNSQAAVAPTILPEKRKKNNQDVDKIGFSNAHKYIFPYL	69	Cytoplasmic and apoplastic
CEP13_0.1	PLQLSPLLFMLYISTLFENSPSNCRVGYVDDITVVRVGKNPREAVEAAQKEVDRITQLALTHKIQFDASKSELLIIGGGPKMRLDTSNLTEWSSKAQRISNFLRSIIKVQRGAAPGPLPGLTRITTKRDKKVSAGVRWHTKLLDQMILTEIRATLPVWRTTPNIVLHRESGILPAEIILQQIQFRITTRIRRLDNYHPLSSRANETPKDAIKRLKLREGQNVRVFRVPDRYQTCLQNANHILPTSEAPGELRKSRNMKVAARAECNRKTRQSSSNFGLETYPQELYVFTRMDHHLVQHSQHMTTPYARTDNSYQAAETIFLGQRSTTRNRRGCTRFGDSIGNQG	344	Cytoplasmic
CEP145_2.7	MHSPKKLIQSFVSALLAILLITQTLALPLEIESMNQDHNDLEAPGAVTGFIPGTTAAHIDHNIGKEEDD	69	Cytoplasmic
CEP145_1.67	MRILQCTMMFIMTFLVQETASVEPQHLDAFGLTYKGANCDRGFFYNYELYAQVDFACAGGKVNGTIVDNPTDDLLNKEIKSFFQKDDSEAKIGLYVAPLFKNNVKDSQNTLVVRKRKNYDPYRLVLSQDCDIVSIIEIYNSLDEKSHVKTTINPCNFL	158	Cytoplasmic and apoplastic
CEP14_13.0	MNFFFITLLLAPLALSSVFKIPFNSTCDDEKPGKQISGSLHHSAQPMTIGKNDCSSFMHKTVTSPSCTEYTTETVKLNTHTVIQERIYESEIPYYSPSDGSKSAYMSSICSSLGITATTATVLTQPTTITITKLISETSMESPTLTTSTVLPSCTADTLTDPQNCGECGNICQSGTCEAGSCTDSKCRVQSCGKFDPCGDKGGDCYCFSSANPIGDISFCGRNAICTGLTACATDLDCVGGSSGNICAISTCCPRFSDEMPGVCLEGQCSNPARKLIQLSRVGAIKESTAAF	292	Apoplastic
CEP14_4.131	MLSLALYRLLTIALAHFTLATAQISSWSPETGKLGNATIVENNPPGVTYIATLPADSASKIKGSISATANPDGIGVMFIVNITNLPTTGGPFAYHLHSNPVSPDGNCNSTLGHLDPFIRGESTTCNKSLPQTCQVGDLSGKHGKITSDPFSTSYVEEFASTAMGIGSFFGNRSLVIHDVNKTRLTCANFTMDQPDGPKASTNSSSPFPFTGHASRIHATIYVGWLLLVGFLLI	233	Apoplastic
CEP14_2.92	GRQRLFLFSLCRIFTVEGSVRVPSKKSQVVSAKAPTR	37	Cytoplasmic
CEP18_2.9	MKFARTIALSSTIAIALAQSLQSLPDCGKLCVNNMLAKARELGCEDGDARCLCKNVDFAYGIRDCSHEVCGPEQAIPVVAYGSSYCKSATGNDDDSDSPSGNHPLGPGQSSTTSGASCKWIINSKIIQTKDNIVSVTTTETQVISSNITGTMSTTATTSAVVTTISSGDDVKTSTIGSATISSSQLVPSPTKSSSSSDPTSSDDNQPTSTSSAGAAKQTLYAGLAVAAGIAALVI	235	Apoplastic
CEP224_9.128	MPSHTNRSSSLIGISALFYTIFLFSPLAFVSSVGASDQAPLQENLGTVIGIDLGTTYSCVGVMQKSKVEILVNDQGNRITPSYVAFTDDERLVGDAAKNQAAANPKRTIFDIKRMIGRKFDDKDVQNDMKHFPFDVVKKDGKPSVKVEVNGSPKTFTPEEISAMILGKMKEVAESYLGTKVTHAVVTVPAYFNDNQRQATKDAGTIAGLNVLRIVNEPTAAAIAYGLDKTEGERQIIVYDLGGGTFDVSLLSIDRGVFEVLSTAGDTHLGGEDFDQRVINYLAKRYNKEKNVDITKDLKTMGKLKREAEKAKRTLSSQKTTRIEIEAFHNGNDFSETLTRAKFEELNIDLFRKTLKPVEQVLNDAKVKKSEVDDIVLVGGSTRIPKVVELIEEYFGGKK…	672	Cytoplasmic
CEP225_4.185	MSMYILILHFKIFFILYLTIAQQNQEKYANQHRQESISYKKGDEVWLNLKNISTERPSKKLDWVYAKHTVTRTFPKSPHFNELNTPKGIHNRFLFDSSYV	100	Cytoplasmic and apoplastic
CEP225_5.81	MIRNIIASVLLMYFQNNVTPRPSIDIENWKFISQKELDKVSEWVKGNRRASNAIMYNCSTTPQLIISSYHKAADMWEALEQTYEGSGIVVHIKS	94	Cytoplasmic
CEP232_11.102	MHSFIEKIGILTLIVFSQSAFSFPHVRRQVSASSCNDDTRAFALDLQNIITTQTQEITTTTQMISTVSSINFDQGVFEVQQSQLVTEIKETLTVMQTSQSIQIGIDGVSTSLTKLTEMQSTHLTVVQQLDSSSINTVSAKQSLDKLSVSLKSCIQQSQQVLQQTLSICPDISGIEKNQQQGIDADDKRKDDFKKNDIKKDDIKKDDNKNLRL	212	Cytoplasmic
CEP232_9.148	MLLVSTTTIVIFFASLTLTQAKPTQDSGFPLVKRDSTTSKSKNYSRGVSNIPKASKIEIHTPSRDFRTIRHSSNEGLVNRNIASEQQGDSKMDFKTLTQGYKGAAKFKIDTNEV	114	Cytoplasmic
CEP254_23.2	MFFNRIPLWGLAIFFLTVQSDGSSAVVDLTPSNFDNLTLAGKPFLVEFFAPWCDHCKALAPVWEQLAKDFAFAQDKIVIAKVDAHAEKSLGTRFGIQGFPTIKFFDGKSDTPEKYEGGRDLESLTEFVEQKTGVRVKKTKPLSHVLILDDSSFKSEISNNKDVFVAFTTPRCAHCKNLAPTWEKIAEDFSREPDVVIAKVDAEAENSKDTAKEQEISSYPTIKFYAKGTIEPEIYHGGRTEEEIVTYLNKKTGTHREPGGALDSTAGIIENLDSLISKLVDGSDFKKVSEKITKTISTIDEGIKYNYASYYVRILQKLADSKDYATTELARLTKIMQKGGLAPGKYDEFTVKTNILRKFTKSRSEKSEL	369	Cytoplasmic
CEP254_25.154	MHIGSVLLVALISARINAVPLNINLGAYSPALVVGDGEISFKGKEEVSELMDALEGAAVSGAAKNGASNFDGTTTADNTTPDGLGVPEKAPTSNFPPQGLGKIIAPRFEPLSKRDEKKRDINGFNAALNFASEAMGRGPLIELSTGPTGSGVGVKVQPKRVDSKQAELEAVGVPVTAPAPAGAKNGLGRRDDSQSPKTKTTVTTMFVRGGPRPDSVEGSETKDLEKRSTPNEGGEENLNLKVADGELAELTFVETRSIDDTTINEE	266	Cytoplasmic
CEP254_17.61	MRTFHLQSGSPLKLWPLILTASIESLNITPNKITPKSPYYAVYNKLPIIQHLHPFGCRAF	60	Cytoplasmic
CEP255_7.124	MKNLIQLVTYASIFDFSISAIVDRPRGVGPKDAHFYNSNPEFKCIFNPSITLKYSQINDDYCDCPDGSDEPGTAACSSVSSSPLSQLVIPTPHNTTLAIPGFYCNNEGHIPAYLPLMNVNDGVCDYDLCCDGSDEWAGVGGVKCTDQCKKMGKEWEHHQEIKENLFKSALNKRSLLVSEAKTIRSELETKIQNLNQEIADSEVKIASLKKKYKDIQRRERGRVLRNGSAKKEKKINVLANLVTMRLDQLRQALLGVVSKSDALQKRVDELEKILSALKEDYNPNFNDEGVKRAVKAWEDYAAIQKAAQSEAPEFEEYDVDVILKEDNEGQGINWDEFEPAKNSDVVTPYKLENFLPVSLHNWISEKSVEFRIFLMDKGIIPPVDSEEIESKSVTEAREA…	564	Cytoplasmic
CEP255_7.25	MRFLLVAILISAFSEGYVGLHTANSYINLEQRKNETIKYTDHQTQWPPQKFVAEVDEEKSKEKTFQGWRCDQTLYSQNNLKVAADEACLRIRSGKKTWSFQRFPVSFPNDSANLIGKLSENPDAENMHGPFYLYPLMKNGEPFKYGIAGHHRVVTNRKCEVVAAVVQVKSRTKCKGFSCFNIFRKEHTSFRQCYEDYR	198	Cytoplasmic and apoplastic
CEP31_2.110	MLSFRGILRGALVAFFSLPLIIETFGAPLTDSTTSTTTHLEPRGKKLLAALGAGGYLIHRKRKKNKNKKLKKKLRQQGIHI	81	Cytoplasmic
CEP35_11.6	MMRIIPLISIYFLCVYSDGSSSGPAFSAYGYAVYVDGELTASGGNQLPGAEVYDAEIAGALRGLEVALGIRGSTGIKVLLDNQEAAEALESGRTNSSLQAVKKFKELSSTYHTVEVRWIPGHSGIYGNEKADTLAKRALASNTRIRNIPASENVSRENQTTLTFAALNRQVSINSQKLAEEWWMKNRTDRYEDLDLLMRRKRPPELGLPRWAYHRLIAARTGHGDFASYHRRFKHQNAEILCKCGREKRPWHFAECRPATQKWRTEAKESRPRIRDMIGQEGWQVFWRFLTVTKCYGRT	299	Cytoplasmic
CEP35_15.173	MYTRLIILTFCVVTFALPLNINLGAFSPALVVGDGEISFGKDGEKEAGQIFDKLAGSSGGTEKAAAAGAAKRDVKLIRSISSVGKRAKTENQKPRKVSITREISNKRSLEGLEKRQSEERDVEERDLEGFKAALLFADGALTKGPSIDLGTGEGGSGVGITVRPPGSGKE	170	Cytoplasmic
CEP35_6.4	MQFFNYLFLFAYYSHLTIARPFGLQDGQFAKPSLTGVSKAVDNFAKDADIVSNALNTLPSMTDKNQIKSTALKAFRAETDEDNHRSILAAAAGFSGQTPNSKIQKYTPTVLKALKDMADKGTTASVQKDIPIIEGVRNSNILPSITQLSNAAMSSSGLQKDAKEFPKTTGSSKIKSGKVDKNDVSSSNNTNRNKTDTVANNKNKDTSHDSNDDDSN	216	Cytoplasmic
CEP35_6.5	MQFSNLLFLVACVSHTTIARPLSLLGRQTQNPSPKSVSQAVDKFARDVDIVNDVINSLPPMTDKEQIQSTAQKAVEVEMGECSYRELLATAAGTNGEAANAKIMKYAPSVLTAFQEMAEQGTTASVQKNLPIIEKARNSNILPAITQLSNAAINESGLEKEAKEFPKTNASSKINGGDDEKKDVSSENNSSDTKDQSNNTTKASNGGDDEKKDVSSENNSNQSNNTTKASNGGDDEKKDVSSENNSSDTKDQSNNTTKASNGGDDEKKDVSSENNSSDTKDQSNNTTKASNGGDDEKKDVSSENNSSDTKDQSNNTTKESNGGDDEKKDVSSENKSSDTKDQSNNSNASNVAGNKDTSRDSDNDDDN	367	Cytoplasmic and apoplastic
CEP35_4.65	VRSHIFFYLFLCSHSLRFSPEYSLYKTGIWCLSFLVPDCDNSSLSSISFFHSSRQRSSSDLFSPQLMTETDRPTPEINMTLQDPFDNLSAEDKQELLVILEQRRNLRTQLVPRDTTNLLIQPVNPSVHSTRSSLPKWNGTAEDFNFYVRRLEARIQREWEPYVDQCSILFGYD	173	Cytoplasmic
CEP35_7.129	RVLHLLSGLLFRLWLIILNAAINILNITSNKLAPISPFFTVHKFLPNMQNFYPFGGRTFWLEQNQNKLASKAKEGTYVETECNREHTFLNPNTGRILTRRDIRLHDDSVPLLKKILA	117	Cytoplasmic
CEP429_2.56	VLNLPHVRINVLSLLLGLPWLYLVKARIDIPSFSLRIGDWKIDSRRVEISTTMFKMGKYQNIRLAIEDEIIARLIQTEIESLKEESILDPFE	92	Cytoplasmic
CEP444_6.6	MLFLLKLGLLTLTLTTGVRGQNKNNNNASPTLDAAAIQKASASTGQEGKPDPGQVDSKTSNENFINFCSGKTLTDGKQVETGSCNGIVMGDIPSKNNMVATVITFPKTGGDPIKANQDFDITVKTKNLVTGSFTNPTTTYYAAPQQLVGGQIVGHTHVTVQTMSSLNPDQPLDTSQFAFFKGINDKASGDGTLTATVKGGLPAGFYRLCTLSAASNHQPVVSPVAQRGSSDDCTKFEVSNDGKASEKAGAVTAGDDSKENSQKQNVSNSGSGKKTKANAAEKDDDDDDDDKKDGKNKLRRRRFNRSFIV	309	Cytoplasmic and apoplastic
CEP445_5.97	MTRQRQERAWQTRLMVCTSFFSCMVSMVASFQEGEEKRNSKANSSVPPNSHFSVCNFRNKYTPT	64	Cytoplasmic
CEP445_6.10	NKATTLWCAWWVAKLNESAPNIKTAPSDSAHVVLTTIVKISLANSHTNLINTAYKFWSFQPSKDMTLHTYIKEFQKRFQDLKEHSSINKEVYHRIKYVLLFHLTRLQPDLANRCGDKYFEQIFTECLKWNSPTSSKSKGTYKIHVKFNFCGIKGHKEV	158	Cytoplasmic and apoplastic
CEP459_0.27	MRRFCFILLVACSSHNHHPLSPTRLPKDIKQQVQEMLRSVNILVTSSRRLLVSPVHIQMCSAFGVSRLSRLHASLGVQDRMTALIREERLFQYPAGTDYADVSREFQLDRLKDSENSGLGTCSTLMRGTISLYAAHKLKQRLLKSHNLTLAQTHMSMLSSLLIRGRHTLSCSERCLGF	178	Cytoplasmic
CEP49_4.6	MTKLAGLIFTFGGVFTHAVEAHSLFTNLYVNNVNQGDGTCIRMPKNPSTSTYPVTDLQDSAMVCGFDGTNGVQRVCSVPKGSQLGFEYRLFPDGREPGSIETSHKGPCSVYMKAVSSATESTGEGDGWFKVWDEGYDSNAGKWCSDKIIENNGILNVNLPRDLVGGNYLVRSELLALQEADKSPPEPQFYIGCAQINLVSDERSGPTTDTIVSIPGHVRITDPSVHFNIYLPKWPYTVPGPKTYSRGVPTDRSMSAAHNNGLLPAKTVAVNGNWWGTEQDAYNSESGCWNATQNCYNQLQTCYDSAPPTGSKGCKKYENKCSKMQSGCRSGDFNGPPDQGMILTDGVKGNLQTRAIAAADLKQDVEQVRTVQSFRGRLQRHWKRSDII	388	Apoplastic
CEP58_10.161	MRFSSITFVFLSAVSGVIAATGDKCQVEIIRAVECDRKTRKGDKISVHYRGLLQDGEKQFDASYDRGEPLSFVVGQGNVIKGWDENLIGMCIHEKRKLIIPPEFGYGSVAVGPIPASSTLIFETELVGIVEVEPPKSIVEKSKSVTSKTTKTFKEAVTSKVSDLINAAKVLFSDSDSDGQEHNEL	185	Cytoplasmic
CEP59_9.99	MKHLAAYLLLNLGGNATPSEDDITKVLASVGVEPDSDRISKLLSELKDKDINTLIAEGSCKLASVPTGGAGGASAASGTAAAGAPAEEKVEEKEEEKEESDDDMGFGLFD	110	Cytoplasmic
CEP65_19.173	MYVPGKLNFSLILKFTTVIIFLTRIVHAIDDPKITDTVYFDISHDDIPLGRIVMGLYGGVVERTAKNFRILCTGEKKEGFGYEGSTFHRVIKDFMIQGGDFTRGDGTGGESIYGVRFPDENFEIKHTKKGLLSMANSGPDSNGSQFFITTSTPRHLDGLHVVFGEVLEGYEVVEKIQNVPKDYRDKPLKTVKITKSGQLSKEDQGTHAEL	210	Cytoplasmic
CEP65_20.191	MIAFPPFGIGFMLIMFHQSSIVNRNLHVGTLCVYSDGSLTGPAFSAYGYVVYKDGELTINYGKKLLWAEVYGAEIAGAIRGLEAALEIRGSTGIKLLLDNQEAAEALESGRTNSSLLAVKRFKKLCSTYPTAEVRWIPGHSGIDINPRPKMCAEDLRTLSLCGTQATSFSRYEDRDLLMRRKRPPELDDPPWACHRLIAARKGRGDFASYH	211	Cytoplasmic
CEP65_3.144	MLFVTLKIVLSVALAAMSAMRETYASPLQMEEINKANAVIKARSTGDGGIRPRFLGAIAGSLATSVVGDTVGPALSTLGDALTSKDSKPAPNDESADQDDQKNESAQDDQKNESAAQDDQKNESAAQDDQKNKSTAQDVQVGQNTSQNVPTIQIPSQNVPTIQVPSTNGQTVQVPSPNGQTAQVSSPNGQTVQVPSLNGQTVQVPSPNGQTVQVPSLNGQTVQVPSPNGQTVQVPSLNGQTVQVPSLNGQTVQVPSLNGQTTQFSPQVGPINQIAPPAGQTNQISPQVGQVGQGNFQNDAQDDDTTKDSNSINDNSEDDDSNSKGSKSSKDNSVDDDSNSKGSKSSKDNSVEEESEEE	358	Cytoplasmic and apoplastic
CEP65_28.45	MRAHHLQSGFPLKFWLIILTASISSLNITPNIVASKSPYYAVFQKISNVKYLHLFVCGAFWLDPDQNKLKSKAKDSIYFGTEFTGGHIILNSDIQRTVVRHDIRVHEDSFLLKSQILAIQNPN	123	Cytoplasmic
CEP65_38.107	MRLLPELFFQSFALLLLLLSSENQGYPHAEISLDAIICRAAVRTRRLDPLNPLNFRARNLQSSFCPTRFTRSVQELSRSQIINPLCNSLGEPGG	94	Cytoplasmic
CEP66_13.6	KMKFLHLIIVLALVMLVASSPLPKKDDSDDKPKDSEAGSGKKSKDKSKTASAAADGDGASVLKSQKYNDFQISDGTTGDAKGKAEALFAGIDRNNLAAVSAADLQIIKNVHDVAEDAEVKAFNPALEKAGDDKDAIQAGKIKNKVLKLTATVLALEIESAQGKDVTAKLKEEQAKLGKNIATDTENKDKPSKGVPFEGST	200	Cytoplasmic
CEP66_22.8	MRSVFSLLKSYVIIIIILRTFCKDLTEVASHHFEAYIRGVSAEPIGSKLSHSAALAPQTSTTASYADAVQHSGLTSSTHAPKKTVIRTAIKPPTESQITDNQKK	104	Cytoplasmic
CEP66_9.168	RTRFKRLLLIGITSSVLGVDALKAALHDAKNGKDIQHYLDAHNHLKIIAPHEEEAQKDSAWIMRTEESNQLETYRLEAELKQYKNNLIKESIRMGNEDLGKHYQAVGELGKAFDAFSRMRQEASIPKHVIDVCRHLIEVSVEQKNWIVAVTNVQKIRQVVTPSDEDKGLQPFLCAIEGLASLDTGKYFSAANFFLNAESGVGQKFNTIIISNDIAVYGGLCALATFGREELEARVLKNANFRTYLELEPQIRRAITFFINGRYTDCLGILDAYHTDYSLDIYLQSHINEIYELIRRKSIIQYFIPFSCVAINSLNKIFAAPGEDIKKELIKMIECKELDAKIDTQNRVSFPFHLLGLTNKTSC	363	Cytoplasmic
CEP6_10.122	MTRDKLLECGVQQGSSLSPLLFLLYIAILVQAEGKNNLFGYADEILILVVGSTASEAVAAAQEEVNKLVHSANENMIDFDPAKSELLAIGGGSKMKRETSGLSIQLNFKQHVQEWCGKAQRVTQSIRQINSVQRGAAPGLMIKAVQACVFSTALYGAEAWWPVISRITIKRDKKVGTGAGWHTNLLESTITKEIRAALPVWRTTPDVVPHRESGVPPATILLQQKQLFAAARIQRLDAWHPLVFRDRESPKETISRLKLRSGQKNRSFTVPERYLTRLQISARSIPSAEGP	291	Cytoplasmic
CEP6_17.45	QLIKLFAISFTIYLAARKPLIYNSDPTTAAGRIASSHYVICWNGISGALCQNTYGCGCSEDGDFYDGGDWPDDGRSCTRFAHHLINLNSIVPESFHLMLNFSLTYREVLLSYKRL	115	Apoplastic
CEP6_9.113	MQALHLQSGLPLRLWLVILTAAIKFLNMTPNKISPQNPHYSVFQCKPNILCLPPFGCKAFWLEADQNKINSKAKEGIYVGTDFTGGHIILNPETGRTIVRRDIRVHDKIFPLRNQVLLLKANNCIVINNALSGPKAERWIEAMDAEINNMTRHNVWTLVPRTEAKGKLMTVSGL	174	Cytoplasmic
CEP77_74.128	MHYTVALSAILGCIAAVKAQTAGFNPFITPKKDQTIRAGEKFEITWEPSGAPPDATVSIKLLQGQTPTTMQIGPNVGSKIPSKAGSFIWPVPRSIKDHESYGFIMYLDGKNEVFQYSFPFDIDNLDNDNDDTPTVPGTKKTFSPKFFDKDDKDDKDDKDDKDDKDDKDDKHDKDDDKYDDDIDDDKYDDDDDYDDHTVTKGPVPPIVTKPNDSGSDSKYNNGTKGPEPKIIYPPKPSAVRPPPSKPSAPVGDKDKGKPPPINVSGASSLVLNLSTLTIGIVIAMALL	287	Cytoplasmic
CEP77_77.12	MPSLRGILRVALIALISSPYLTHAVELPLDSRDITLPLEQRDVELPIESKTNKNGVSLGTSIFNTADAADAADAADAVEVRSQNLIRRGRKSKKIRKKYRIRTKHKKSKNYKKSKKGRRYY	121	Cytoplasmic
CEP77_77.6	KLLDYLVSVLLSAGILSVVNYDNLSMNESRDFTSEGLKGLKPLSQSNYIEWRDVVDDYLDSQNWAKYSVEGLPNDANDELRAKSVVKVRAYRGIDCLRFGIFKNKLLLTADIIEIVNYVQVYEKSSWFNGKF	132	Cytoplasmic
CEP77_89.2	ECGVPQGSPLSPLLFMLYISILFEDGSSNCRFGYADDISVARHVQQWSSKAQRISKFLRSINKVQRGVAPGPLIRAVNSCVVSTALYGAEAWWPGLIRITTKQDKKYNKKDKAKQFKLWLRNLPAGTLCAYSDGSSSGLAFSAYGYAVYKNGELIASGGKYFPGSEAYDAEIAGAVRGLEVALEIRGIIGIKILLNNQEAAEALESGRTNS	211	Cytoplasmic
CEP77_37.118	VRSRLAIITLSLGRILFVTTKSHGKIQGVTDEKIVECGVCQGSPLSPLLFMLHISTLFEHSSLICRFGYADDIAVVRVGKNLHEVDKAVQEEWNRKAQLISNFLRSINKIQRGAAPGPLVRSLKACIVSTALYGAEAWWPGLTRITTKRDKKVSTGVGWHTKLLDRTILTAI	172	Cytoplasmic
CEP77_38.93	MVKALKGSQRSLLFSLWLIFTVEGRVRIPGKKVSGGFSECTLTT	44	Cytoplasmic
CEP77_47.24	GSQRFLLFSFWQIFTVAGRVRVPSKKVSSGIDECTYYRSGPNDRLSYVCK	50	Apoplastic
CEP77_50.84	MLIYTPLVYFLVLAVPQATVTSAQKGLCLITRQDPDKCLFTSPTSFTIHDFTTFSPADGNLTPASVSFRYSNNITLLVAHCSSRNDLVFDNDISTLGENQQVSFAYNSNNLTIIEDYITCPTRTAAQVVGFLDVNTFCYPNYPPSPYGYGTKCITPSGSLSGSFS	165	Apoplastic
CEP77_67.112	GIQKFFLFTLWWIFTAEKRLRIPSKKISSSINECSHCMSFPNAKLSCLCI	50	Cytoplasmic and apoplastic
CEP77_80.18	MTLTAKFCISVGLLFLAHACYSAHEYSTLHSVSTASKNRISRKADVDSNLSSPPIDISVETIIAIIITCLGLVLNTPNLKPIQWRVWAGKIERESDQCLVNSNGLLSKDIFGNPFKALENRPGFVDIRKQRKEFLEWVKNNEAELETSEKKEFKQDQ	157	Cytoplasmic
CEP7_6.0	MVSLLNLIILFALLSIVKTNASPFKKLSSRAEEIPQFVKDFAPVVFLDKEEQFFPSDIAKHIENTSPSIYLNAVDPAPAYTIDNLEILNTVGNQGGDVFLTSKELVKDNPAFLKGTKPDDTGATVDATSCVTIVSDHGDGTVDAFYIYFFSFNQGTTVLFHELGDHVGDWEHNMIRFKDGVPEAVWFSQHAGGQAFKYSGLEKEGDRPVAYVARGTHAVYSKDGDHDHTIPGINFSKGPLEDYTSRATRWDPLKSTFFYTFDRSTDAFTSVDNSPLGIVQFKGKWGDARYAKGTKGQKKLFSFRKYVDGPSGPQTKDLKRANICPDKIKDCDIKDKVAP	339	Cytoplasmic
CEP7_9.11	MVSLLLSILLVAVLNSVNTNASPLFKLSSRAEEIPQFVKDFAPLVFLDKEEQYYPADIAKHLENIAPFIDLNSIDPSPSITVENLETLNTIGNLGDDVFLTSKELVKNKPAFLTGTKPDNTGTTVDATSCVTIVSNHGDGIVDAFYVYFFSYNQGNTVFSHELGNHVGDWEHNMIRFKNGVPEAVWFSQHAGGQAFTYGGLEKEENRPVVYAARGTHALYSKDGNHDHTIPGINFSKGPLEDYTSRAIRWDPLKSTFFYTFDRSTETFASVDNSPLSIINFRGKWGDAQYPKGKKGQERFFNYRKYVDGPTGPRDKNLNRVNVCPDKTKYCKIKVKVAP	339	Cytoplasmic
CEP9_23.138	MASISLFVLALISPSSRCLHAASDERQQLVPNARQWDRERLYGQMFPNEVWSYWGTNSRNFVTVQAEGDRNDIVFDRHRPECLTRKNTRNTALMFHGVVYGGEKSHWNVLRVGYYNSEKHVWVLMKNHVQGDYLKRLNENQTISHSDLQVLIQEAWDSVRDEDIAALFDSRRDRCDADIRANGGPNQVPIINCL	194	Cytoplasmic
CEP9_34.3	MKHISTLAALAALSGVIATPNAKLDTRDSSLTPITVKGNAFFQGEKRFYIRGVDYQPGGSSKLVDPIADEATCKRDIAKFKDLAINTIRVYTVDNTADHDACMSALAAAGIYLVLDVNTPKYSINRATPAPSYNSVYLQNVFATIDAFAGYTNTLAFFSGNEVINDDKTTSSAPYVKAVTRDMRQYIGSRGHRKIPVGYSAADVDSNRREMAEYMNCGSDDERSDFFAFNDYSWCDPSTFKTAGWDVKVKNFTGYGLPIFLSEYGCNTNTRQFQEVASLYSTDMTSVYSGGLVYEYSEEGSNYGLVKIDGKTVTDKPDFNALKAAFSKTANPSGDGGYNSAGSASKCPSQSSTWNVANDDLPAIPNAAAAFMKKGAGKGAGLEGTGSQNAGESSPGTAT…	445	Apoplastic
CEP9_43.137	MKLLFQLLLFGLVTDFAFASNWFSRAIYNNWHETELERWLTDNDIPYPSPADRKDLEKIVSENWQSKIAQPYYDWNVDQLKSYLKERGIQAQDSATENKDSLVSQVKKIWYEKEEKSEDAWSNIKDWIFDDWSDSKLRAFADKYGITVPEPKKKESTLQAIRSSYDAVAKKLGQSVAYPGDWLYETWSDSDLKQWLDSRGIPVPQTSSRDKLIAKVRRNARVASLKAADAKASASKSASSINQDVTEKVIESWSDSKLKEFLDKNGVSVPQGSKNTELVAIARKHLANLSGNMVVSSAKGAANEASASGSSAFGAATSHVEENYAAATDDTKIMAQDAFDKVVSSWSDSRLKAYLDSRGVPLPQSNKREELLAAVRLNRHKAINGWSAWTFDTWSTDKL…	568	Cytoplasmic
CEP9_53.10	MRFIYYLAIIIATVSNSVNGNPLNRSKNPVTINVVPFDSDVKCGNVLHKEESINKGAIAACKWALRGRSCFGFLCRNKASIYEGNDVSKSSAHSLLKYEIDSKFKYVNGM	110	Apoplastic and cytoplastic
CEP9_59.122	MLCFISIFTTALLISPAFGDDAVRDNLILEDNPIDQIKNMNSGPTIHEFHLNSDMYSPSMEFNGFRLKRRHSRNDGYYCGKKHHKFTADSSVKIAVENACEELKRSKYKNEERKNKEYKNDDYPFPKGAKSFVKFSPPLFNYQIENESNKSES	153	Cytoplasmic
CEP17_15.78	MIWLIIINLLVMPGSSKNTVKDGQILQLIKFFWVKQPELCVSRSCPQHGLDISILRQRICQKPHVDSETKD	71	Cytoplasmic
CEP197_8.1	MKSSARYFICAGVVLLLTSSFSEAYVHKHKSYHAKIPLSHSHHNLLELRNINETDGNVEDLPPKDYHGIKKETSKCEFPSDAGLVAVTPKAKNAGWAMSPDEQCTPGSYCPYACPSGKVMAQWSPEAKAYTYPQSMDGGLYCDHDGQVKKPFPEKPYCVSGTGGLEAHNKIGMGVSFCQTVLPGNEAMLIPTHVKESTELAVPGTNYWCNTAAHYYINPPGVGVEDACIWGDGSKPVGNWSPYVAGANTDESGKTFVKVGWNPIYTGSSLSGTPPEFGVRIVCEKGDCDGTPCSLDPSTDGVGGVMSADKASGAGGAGFCVVTVPKGSKASIEVFRAGSNHEHEDPKDEDHKDKDPKDDDHKDKDHKDKDPKDDDHKDKDHKDKDPKDDDHKDKDHKDK…	649	Cytoplasmic
CEP197_8.3	MMYSLFLAAILATLAIAAPLDNLIDSTEESKYTEYGAYGSYGSYGGYSTNDISDKAVSPPESPAVSENFVAISTRSGDPNVHLRPLSASHQKIFIGNETSTYCPLSDCSSYVNFTVFSARPNDANSNLGLFTSTPGGQAIFVMNDGQLGYTQAHSASKPTDSVISPFLYTPEKEPNTLGTVNFNSGGWAACPVVDSPGVYQLYALAARGFSRTDCIGIVIATVSYYDNPAYQYN	234	Apoplastic
CEP230_22.3	MRGKFFLFAAFFCSVYAHGDGVEGLPQLMGARKFLSTLKSRNLQLSVDTIEHKSDQVAKELVTSDGRCGPGIGSCTNCCSAEGYCGSGPDYCISPDCQYQYGPLCHANIKPAGPSTADVPRPLVGSIPYGGAGIFDCVTPGTVAFTFDDGPYLYTEDILDKFQRYNAKATFFITGNNLGKGPIDSTPAWTKRMVAEGHQVASHTWSHQSLDKIDSQTFNHQVYYNEMDFDVDTAGYLNMDASRIQKSKDIWDSTIAGADPATSNFLEIEHDIHYQIAYNLTDHILDSMYSRGYRSVTVGECLGDPPANWYRS	312	Apoplastic
CEP230_0.59	VLGLYPVTLIIIILIIIINLKRAQSSIAIQIRSEQIGLNAYLHRRKVSGVEDPRCQCGYPSQNAKHMIMVCPQWAQGRGEVSRKAKNRSFEAMMVSPEDVSRITKWIQSEGFIEQFRLTREVEGVVEERGKAKR	134	Cytoplasmic
CEP230_27.132	MRYYSLVMRIFALMVLFVMFANTVESSGSSRLLKRGGEERKNNNSDKYHKYCEKCNSKFKDKGPNKYCRVCQLAFNYKSNQG	82	Cytoplasmic
CEP230_7.43	MQHTCVQEFTIASILILIYSAHAQHMIGRQWKQLIVYESDLDNYNQCLFRTFFASIQKHISILLCNNGNGHRVKTQLDRPVHV	83	Apoplastic
CEP27_10.107	MHFTQLLIFAFIALVAATPSGLNFYERRTDGGDDEAPQTCAEAVQSIPKCALSCITQPPIDAGCKSAADFACTCEKKTQKQITKAETPCVLKACGLKEALQASKAGKAVCEACNVSPSDPSDGHDGHGHDDDGDDESYDNSES	143	Cytoplasmic
CEP27_21.83	MLQLYIVFVLLPALVAAKGQLGFALGTKKPDGACKSQADYDTDLRTLSSLSKIVRIYAASDCDVAKEILPVAQSQNVKVILGIWPDTEDSYQKDKAAVVTYAPKYREQVYAITVGSECLYRGNFTGNQLLTKVLDIKKTLGNQFKVGTADSWNKYQDGSADPLIKGGADILLCNAFSYWQGQKIENASATLFDDVSQAFGHIQNIAGIEKTPELWVGEAGWPSDGVRYQDAQPGITEASKFWSESICAIRKWGVNIFAFEAFDEPWKPKSVGENGIAADETHWGIFKADRSEKFTISAC	299	Cytoplasmic
CEP27_21.85	MHFIRVILLYLTWSTDTIFIPPQITLTDLEIGFISSAMEKSSSTSNAVVLSDVIGRSRSTNAFAGFTRSFESITGILDADDSNITVLAPTNRAIMKLPQRPWEDPGEYSTLGEEVYEGEIGEDRALNNLKKFVESHLIWTSPWKEGEMAKSMSGKEYCWHIKDGVKIIQPGNIEIIEVLDIVRNGELWLIDGVLN	195	Cytoplasmic
CEP27_88.121	MLLKSIVKAILFLLFINSTTAKKKKTAPWPPVVKTSRKAFHRSVYKESGNLGYYNFSNIRYGRITNRFTAPAQLCTSIFKSCHGGNPSISRPTTLGDSFSGNPKCSQAFPRKLYTVIYFKG	121	Cytoplasmic and apoplastic
CEP27_93.3	MIANLTTRTLAALFTSSVSIVFALSSHDIPADVPISSLIESANKHLANGETNDALLYYDVAIARDHQNYLTYFKRGAAYLSLGKTSKAFADFDKVLSIKPGFEGALFQRAKIKTRIGDWDGSKKDYLAHGDSAQDLALVEEARKASILASDAENMGKWEECIIQSSKAIEVASRMLTLRLSRANCRIQNGEIHEGISDLKHVLQLQPGMTEPHLQISATLFYELANMEQGIDEMRNCLHSDPELKICKELYRREKALEKQINQQKNFQKARSWCDQSLEYEPNNLYGLLSRAQKQMEAENYEAAMKILNEADKLHPDTHEIIQMLQDAQVELKRSKTKDYYSVLGLPRDADSLQIKSAYRRLIKRYHPDKAHKQGISKEDAEKKMAAINEAHEVLSDPD…	456	Cytoplasmic
CEP27_115.102	MKLFQKSLTTFIFFLFIFTLFEDVYGRSNYFVCTKDGCRDVVAKTSSRIARRAQPVRKCSSCKKIPRDPKTNAPIAVDIQSDQVDCVGKKNFFTRKINCRV	101	Cytoplasmic and apoplastic
CEP27_13.79	MSIPFFLAVSHLVTILNVSAGCCEAKTNGRCTQAKPR	37	Apoplastic
CEP27_50.76	MPSLGCIIIFFATVLQITLTTIVNPSHLKSISSWGSESGKARDGSLTIPIKRKRDLPPDQTSKGKDVVTGVLCARKTYGSPYINDAAVKFCKKLYHRRKNYPYITANYPIYVGPKDKFWGKDLYQVQINKLFTGGLLQAARRKLCYFLSPRD	152	Cytoplasmic and apoplastic
CEP27_59.134	MLGLRPVTSVIFLFFANRLLPTLQSTTSSAIGLVDYTNILTFSNKIEENCRTLEKLREKCEQWVRSYGVKFAPDKYQLMHFSRARKKQKIHAKIRIQNHLQSPKDSLQILGIYMVPKLSRNAHIKNVQLKAG	132	Cytoplasmic
CEP27_98.23	SQRLFLFSLWWRFTIEGKLRDPIQKVSSSISECTH	35	Cytoplasmic
CEP314_0.66	MLQIVYTFLCLILIPCPLTQLPQTFIRKHN	30	Apoplastic
CEP422_6.119	MRALHLQSALPLHLWPFILFSSINSLNITPNSIAPKSPHYAVIGNMPDIKNFYPFGCRAFWLDLDQNKTNSIAKEGIYVSSEFTGGHNILNPETNRTVIRRFIRIQENFFPLKTQILALKSSNRRILNSALSGPNTHHWNLAINKEIDNMTRNKVWTLVPKSEASGKLMTGR	172	Cytoplasmic and apoplastic
CEP435_21.10	MLKYFFWILLSWAELDSLKCAASEKALEGLKRAIRVGNIKAIYLLVWMSRFTRFEYSTLIFEQNIGGCKLLIWALHNVGGDALAVMSHLLTLAQEQINEQHIEEIQNEITNMKFDLDEANDEASFVWIVQLEKVAQNLRARSPFTFGPDLLASSPTLHLLVVSPGNPLLQEKGAKQRGILPSRTPFIYAGSVGFVSSSLTLAPIYQRTPTIGPEKKRGGLYDSNTKPPKLKDWALAQPHFRPAPRPQHQQTQLFDIFQRRRKRRRLIQTTKNVRQKLGTDASVLSSRPRNFGPLKWGSSAMQGRMWEE	308	Cytoplasmic
CEP448_10.2	MLLRASLTFWALLAAEIRFSLSNSIGRLANLEVVDDINANGIMIEWSSCKGRYYDKDVVYETLKQACETKNSSTIFEKAVNLRPHIPSPSEKYHYEINGPYFAYPLPDNFIKDKPHPIDVIVMNDECKLAGILMETTKISCDDNTCGSEPRYKDCEIKLTKTVPTPTEEAQAVQLS	176	Cytoplasmic
CEP67_48.1	MQILFLLLSALNLGSVIAQKTPATKPSDGSGASSNDQKDGAEQKGAGGQVKVHVVKVGANNMQTFEPNKLTAEVGDMVQFQFFGGNHTVTQSSFDQPCTPISMVDASIKGFYSGFMPVSASNENLPTYSVMVENKTPIWIYCAQGQHCQKGMNMVINENLKANSTRSFENFSKIAAKSVTVQMKLDKDPTKIAPPFKASPSGVSAPYMRPSGTPPKPDSSKDKGDKGDKGDKGDKDGNDSKDSKDGKDGKGDKDSKGGNAPVATPADPPKPDSPVAASGVRVGTSSAISILVVFLYLVL	299	Cytoplasmic and apoplastic
CEP67_67.154	MIFRTHYLSLFAVFLLNTVIWQGAAEKLAWTGIKGKLSILEKLSSLNPSELLEIKTPQPNIYVQATLELKRLCDKPICHRLAAYLLMNNCKGLNEIDEQNYSFNRGQLQQDQVDAFAATLTICDLERAKFDVPKTCLHFTSSSLMKVAKSRSDLEFSTKEVNDCLQGLGKNAKHWATWLSYRDSALLFCRAARLSIEKDESINLHRELMAIMKEFSKELHLDFDQLKKNVALHKSSIESVFKKINEEAGEWKFKFEKIFGEDIHQEVNKIFQENVKARLKAKEDFSMILKDSVQISEDHRYKMRQVAIEQSKQHKVLRDSLSSSEVHANIINNALIGMQQFMLRLQERQDNIERVRNCSI	360	Cytoplasmic
CEP67_14.121	MHSLYLQSGLQLSLWPIILTAAINILNVTPNSTAPQFSYFAVFQKLPEIKLLHPFGCRAFWLEPDKCKLKSKAHEGIYVGTEFKDGHLILNPDTKRIIVRRDIRIHENYFPLRKEVLATLNNNRSIIDSALFEPRAKEWSKDIDQELENMDRNQVWKLVPRSEANGRLMTGKWILKEKSDGKLKARWCARGF	192	Cytoplasmic
CEP67_43.83	MLKHMLSTGHLSLFISLIQPHATCIIFSDSQAALLRINKSANYFSHKIRSECTKLNFKIFWYPDHQGIEGNGLADGLARKGLDKILQPRDRFTSYSYQAEGIKRNILLAWRSGWTKQVLREESRKAIGFGNYYRISARKSVPNFKTKATNLTNFSRGTKSSYFKARTEIGGRMV	174	Cytoplasmic
CEP67_50.67	MAKGRKCSQGFFFFSLWWIFTVEGRVRVPSKRPRVISANALTTSVVHISNQALSMYSSREGNKTLHQALIMLDLRLQRKKIQSITIDSVYGINRCF	96	Cytoplasmic

## Sheet: Additional File 3
Table S3. Homology analysis of Golovinomyces ambrosiae candidate effector proteins against effectors of Golovinomyces cichoracearum upregulated in haustoria during infection. Homology analysis was run using MMseqs2 with publicly available RNA-seq data of G. cichoracearum isolates GcM1 and GcM3.
Query (G. ambrosiae)	Target [NCBI Accession ID] (G. cichoracearum)	Seq_Identity (%)	eValue	Alignment_lenght
CEP11_63.94	RKF50441.1	59.600	1.062E-66	176
CEP11_63.94	RKF71099.1	59.300	3.184E-61	165
CEP11_63.94	RKF57776.1	38.800	3.354E-36	190
CEP11_63.94	RKF81423.1	33.600	2.398E-27	189
CEP11_63.94	RKF73642.1	32.500	2.831E-23	213
CEP11_63.94	RKF55802.1	33.300	2.682E-20	157
CEP11_63.94	RKF60663.1	30.500	6.817E-20	165
CEP11_63.94	RKF56325.1	33.300	1.732E-19	155
CEP11_63.94	RKF62769.1	27.600	1.177E-07	94
CEP11_63.94	RKF78130.1	24.600	3.883E-07	134
CEP65_3.144	RKF66764.1	32.800	8.452E-05	67
CEP145_1.67	RKF83883.1	40.400	1.631E-27	141
CEP145_1.67	RKF71467.1	39.300	2.478E-25	145
CEP145_1.67	RKF65087.1	27.700	2.522E-10	154
CEP145_1.67	RKF72189.1	26.900	2.457E-08	141
CEP448_10.2	RKF64692.1	81.800	3.570E-96	176
CEP448_10.2	RKF64814.1	82.000	5.748E-91	167
CEP11_63.133	RKF73642.1	53.700	7.631E-68	228
CEP11_63.133	RKF63043.1	45.000	4.091E-29	152
CEP11_63.133	RKF50441.1	43.800	1.093E-24	113
CEP11_63.133	RKF57776.1	47.900	3.218E-23	95
CEP11_63.133	RKF71099.1	44.300	5.947E-23	105
CEP11_63.133	RKF62769.1	28.000	1.345E-04	82
CEP11_33.146	RKF73642.1	56.600	1.312E-71	217
CEP11_33.146	RKF63043.1	51.000	2.377E-32	138
CEP11_33.146	RKF50441.1	42.900	5.515E-24	113
CEP11_33.146	RKF57776.1	47.900	1.649E-22	95
CEP11_33.146	RKF71099.1	43.300	3.056E-22	105
CEP11_33.146	RKF62769.1	28.000	1.156E-04	82
CEP119_18.91	RKF58429.1	26.800	1.196E-05	106
CEP11_58.17	RKF73642.1	51.200	3.146E-49	193
CEP11_58.17	RKF63043.1	45.600	1.009E-30	152
CEP11_58.17	RKF57776.1	45.300	1.614E-12	63
CEP11_58.17	RKF56325.1	34.000	1.323E-07	88
CEP11_58.17	RKF55802.1	34.100	5.728E-07	77
CEP11_58.17	RKF81423.1	37.500	1.028E-06	77
CEP9_59.122	RKF54622.1	44.500	1.508E-41	164
CEP9_59.122	RKF65963.1	44.400	7.293E-41	171
CEP11_65.8	RKF50441.1	59.600	7.746E-67	176
CEP11_65.8	RKF71099.1	59.300	2.323E-61	165
CEP11_65.8	RKF57776.1	39.100	4.592E-36	190
CEP11_65.8	RKF81423.1	33.600	1.432E-28	189
CEP11_65.8	RKF73642.1	31.600	1.839E-22	213
CEP11_65.8	RKF56325.1	33.300	2.682E-20	155
CEP11_65.8	RKF55802.1	33.300	3.661E-20	157
CEP11_65.8	RKF60663.1	30.500	9.302E-20	165
CEP11_65.8	RKF62769.1	27.100	5.229E-07	92
CEP11_65.8	RKF78130.1	25.400	1.275E-06	102
CEP9_53.10	RKF58093.1	35.700	1.022E-19	109
CEP65_20.4	RKF82442.1	27.500	1.236E-28	275
CEP65_20.4	RKF80003.1	27.300	1.129E-25	300
CEP11_62.1	RKF57776.1	46.600	1.180E-52	212
CEP11_62.1	RKF50441.1	44.100	1.443E-31	120
CEP11_62.1	RKF71099.1	45.500	8.282E-30	112
CEP11_62.1	RKF81423.1	43.100	7.316E-29	116
CEP11_62.1	RKF55802.1	42.300	4.657E-19	78
CEP11_62.1	RKF60663.1	40.700	1.587E-18	81
CEP11_62.1	RKF56325.1	41.500	7.334E-18	77
CEP11_62.1	RKF73642.1	35.000	1.229E-13	111
CEP11_62.1	RKF66837.1	29.000	6.344E-06	91
CEP11_62.1	RKF62769.1	27.100	1.511E-05	103
CEP75_5.132	RKF51375.1	68.800	3.137E-160	436
CEP11_75.8	RKF80725.1	33.000	3.983E-17	215
CEP11_75.8	RKF73130.1	33.300	2.790E-15	183
CEP11_60.3	RKF73642.1	52.900	4.545E-66	228
CEP11_60.3	RKF63043.1	44.400	5.575E-29	152
CEP11_60.3	RKF50441.1	42.900	1.741E-23	113
CEP11_60.3	RKF71099.1	43.300	6.916E-22	105
CEP11_60.3	RKF57776.1	47.900	6.916E-22	95
CEP11_60.3	RKF62769.1	28.000	3.166E-04	82
CEP230_18.9	RKF65281.1	78.000	1.973E-58	123
CEP230_18.9	RKF62327.1	74.600	1.095E-55	126
CEP230_19.30	RKF80725.1	68.200	1.163E-66	204
CEP230_19.30	RKF73130.1	67.300	1.307E-64	204
CEP11_61.149	RKF81423.1	59.300	1.913E-67	176
CEP11_61.149	RKF55802.1	57.500	2.019E-61	159
CEP11_61.149	RKF60663.1	53.600	1.338E-60	165
CEP11_61.149	RKF56325.1	56.200	7.304E-58	159
CEP11_61.149	RKF57776.1	35.700	4.344E-34	180
CEP11_61.149	RKF71099.1	30.000	1.196E-20	178
CEP11_61.149	RKF50441.1	29.200	2.669E-19	178
CEP11_61.149	RKF73642.1	23.600	1.251E-10	203
CEP11_59.30	RKF81423.1	45.300	1.002E-42	193
CEP11_59.30	RKF57776.1	41.800	1.156E-31	129
CEP11_59.30	RKF55802.1	41.800	2.398E-29	159
CEP11_59.30	RKF60663.1	40.300	1.150E-28	165
CEP11_59.30	RKF56325.1	41.300	1.133E-25	149
CEP11_59.30	RKF50441.1	32.100	1.102E-22	174
CEP11_59.30	RKF71099.1	31.500	1.266E-18	165
CEP11_59.30	RKF73642.1	35.900	5.541E-13	112
CEP11_64.126	RKF50441.1	59.600	7.746E-67	176
CEP11_64.126	RKF71099.1	59.300	2.323E-61	165
CEP11_64.126	RKF57776.1	39.100	4.592E-36	190
CEP11_64.126	RKF81423.1	33.600	1.432E-28	189
CEP11_64.126	RKF73642.1	31.600	1.839E-22	213
CEP11_64.126	RKF56325.1	33.300	2.682E-20	155
CEP11_64.126	RKF55802.1	33.300	3.661E-20	157
CEP11_64.126	RKF60663.1	30.500	9.302E-20	165
CEP11_64.126	RKF62769.1	27.100	5.229E-07	92
CEP11_64.126	RKF78130.1	25.400	1.275E-06	102
CEP255_7.25	RKF78796.1	63.100	4.872E-82	198
CEP255_7.25	RKF55919.1	58.000	4.234E-74	198
CEP255_7.25	RKF81045.1	28.300	6.747E-14	166
CEP255_7.25	RKF82336.1	29.800	3.473E-12	137
CEP119_0.92	RKF81045.1	68.900	5.502E-88	203
CEP119_0.92	RKF82336.1	67.500	2.190E-85	191
CEP119_0.92	RKF78796.1	31.500	5.980E-13	126
CEP119_0.92	RKF55919.1	30.800	1.985E-12	126

## Sheet: Additional File 4
Table S4. Protein annotation of predicted genes from Golovinomyces ambrosiae. Protein sequences were predicted using MAKER2. Complete amino acid sequence is displayed in column B. Protein length in amino acid is displayed in column C. Annotation was performed by eggNOG-mapper v2.2.12, InterProScan and homology searches was done using BLASTp against the whole nonredundant protein database . The ta…
Sequence_name	Predicted_AA_sequence	Protein_size	eggNOGG_description	GO ID	GO NAMES	KEGGKO	KEGGpathway	PFAM	InterProScan ID	COG category	Top_BLAST_hit
aug-contig_10-processed-gene-0.104	MAQFVPRTIFPSQLDLPRSYFLGHHASGLAEMKAMLTQIQLIIECRDYRVPLTSRNPLFEQSLVGRERLVVYTKKDLGNTERRIDKIREGIIRDWHRPQPTFFTDYRSKKDIKTLLEFFREYASQRQSVLPSRILVIGMPNVGKSSLLNSLRKIGVKKSKAAATGAQPGITRKIASAVRIVERDQEQKFEGVYLVDTPGVFIPYVSDAESMLKLALVGSVKDTIIPPVTLCDYLLFKLNQQPRGERLYQDYNSPTNNVVEFLEAVCRKTGRLKKGDIPDIDAAALWIIQRWRQGNMGRFVLDQIEESGLEKKMNEEPVKSFSQARKQIKDARRDKSR	337	50S ribosome-binding GTPase	P:GO:0006412; P:GO:0032543; F:GO:0003924; F:GO:0005525; C:GO:0005739	P:translation; P:mitochondrial translation; F:GTPase activity; F:GTP binding; C:mitochondrion	#N/A	#N/A	MMR_HSR1	G3DSA:1.10.1580.10:FF:000009 (FUNFAM); IPR016478 (PIRSF); IPR023179 (G3DSA:1.10.1580.GENE3D); IPR006073 (PFAM); IPR027417 (G3DSA:3.40.50.GENE3D); PIRSR603373-1 (PIRSR); PIRSR038134-2 (PIRSR); PIRSR006230-1 (PIRSR); PIRSR603373-2 (PIRSR); PTHR45782 (PANTHER); cd01856 (CDD); IPR027417 (SUPERFAMILY)	#N/A	hypothetical protein Golomagni_01374 [Golovinomyces magnicellulatus]
aug-contig_10-processed-gene-0.106	MALKIPHEYNQFKPWIIADRFNDFTLDPTAENAEAGILHTFILQRIAWYSVNEWVGGRLWEYYQDDFEKWDQEMMSKCNKTIINLLRDFLVKHGVYIPVDRKRGNDAKLLAILKETEIHEWTHEEATYQIKHCGGFAQNFDPFYGNLVSTKQSIDDNSQVQLPSFRVPQLNLKSESTPVSESRQYHENVRENPSNLSNLPNPPTGFSKQLIDIERMYTDKSKKYGGEIYDVLSSKLLIFYDYCRKVGLEENQYHNAYSSMLKDRASQFFYDFLSHKNYSFSKMMELTKNHFETESNKQEYLTLWRTTTLAKTRIENPDKKTSECFQIMVDSLLRIQRGLWGSYQVDQNIRDQVLNCCQGFKECELALYNPGESFEAVVAQVRNAIHTKEQQTRNAHQFT…	1736	Reverse transcriptase (RNA-dependent DNA polymerase)	P:GO:0015074; F:GO:0003676	P:DNA integration; F:nucleic acid binding	#N/A	#N/A	RVT_2,rve	IPR036397 (G3DSA:3.30.420.GENE3D); IPR050951 (PANTHER); IPR001584 (PROSITE_PROFILES); IPR012337 (SUPERFAMILY)	L	hypothetical protein [Scandinavium sp.]
aug-contig_10-processed-gene-0.108	MLFRFRESQAADLGIIDVGRTRRPKMITEVNAIPACEKWRGQVLKEISRKVSKIQEISLSDFMVRDLNDEINKLMREKHMWEVQIRNLGGPNYMRGGGKVYDDEGREIPGSGKGYRYFGRARELPGVKEMFEAAANSLKPEKPLEARSDFRNKVDASYFGFNLNEESDSLLEYEKTKEDEAFKNVLSLTTGEPPKGWESLPGDIGDGMGWRLPSSEEVQEELVERRRKRLLENLG	235	Isy1-like splicing family	P:GO:0000350	P:generation of catalytic spliceosome for second transesterification step	K12870	map03040	Isy1	G3DSA:1.10.287.660:FF:000001 (FUNFAM); IPR009360 (PFAM); IPR029012 (G3DSA:1.10.287.GENE3D); IPR009360 (PANTHER); IPR037200 (SUPERFAMILY)	A	Pre-mRNA-splicing factor ISY1 [Golovinomyces cichoracearum] RKF64555.1 Pre-mRNA-splicing factor ISY1 [Golovinomyces cichoracearum]
aug-contig_10-processed-gene-1.100	MRGLINLALLPIMASAAPSFKSDTIAPLLSSQNSAQVPNSYIVVFKKHVTEASAANHHSWIQDIHNQVETERTELRKRSQSPINEVFNGLKHTYNIAGNFLGYSGHFDDKTIDEVRRHPDVEFVEKDSLVHTMINTDVERERQAPWGLARISHRDHLTFGNFNEYIFANNTGEGVDVYVIDTGINIEHVDFEGRAEWGKTIPMYDEDIDGNGHGTHCSGTIAGKKYGVAKMARVIAVKVLGSNGSGTMSDVVKGVDWATKSHLKNVKEKKKGFKGSVANMSLGGGKSHALDHAVNGAVTAGIHFAVAAGNDNADSCDYSPAAAELAVTVGASTLDDSRAYFSNYGTCNDVFAPGLSIKSAWIGSKNAHNTISGTSMASPHIAGLLAYYLSLQPEVDSDY…	1621	Belongs to the peptidase S8 family	P:GO:0006508; F:GO:0004252; F:GO:0008236; C:GO:0005615	P:proteolysis; F:serine-type endopeptidase activity; F:serine-type peptidase activity; C:extracellular space	K01336	map04138	#N/A	IPR015500 (PRINTS); G3DSA:3.30.70.80:FF:000006 (FUNFAM); G3DSA:3.40.50.200:FF:000007 (FUNFAM); IPR037045 (G3DSA:3.30.70.GENE3D); IPR010259 (PFAM); IPR000209 (PFAM); IPR036852 (G3DSA:3.40.50.GENE3D); PIRSR037907-1 (PIRSR); PIRSR037907-3 (PIRSR); IPR050131 (PANTHER); PS51892 (PROSITE_PROFILES); IPR034193 (CDD); IPR036852 (SUPERFAMILY); SSF54897 (SUPERFAMILY)	#N/A	hypothetical protein Golomagni_04049, partial [Golovinomyces magnicellulatus]
aug-contig_10-processed-gene-10.98	MSKIQCSLFKGIPTYEIYARFSPGTLDAINVIRKKYVDKQIYPRDIGIRLYKNIIKNDKSTSAMNSKLATLAKSVAPFHVQILKPFRNMAAEKKNYLPSVYYEIKKYPFNLICADLRILFNSLSRRRDLPVTTTSFKIGLTGELGSFEESDRIVKELSAIEIPKPLKFDAFVLATRPNTKPLSELEEEIKEFPFTATDKEFGTFLEEITVKRDEYVKARLVKKQEKLKKDKKAAPEVTEESDLTKDQDATKLEENLKGGTDLEKKI	266	#N/A	#N/A	#N/A	#N/A	#N/A	#N/A	#N/A	#N/A	putative blumeria specific protein [Golovinomyces cichoracearum]
aug-contig_10-processed-gene-11.110	METVKNMANYVSETAQGHGAEASKETNKNVAKDSDASLGTRAGAAKDALVDKKDETSHNAKAEAHKESSKH	71	Glucose-repressible protein Grg1	#N/A	#N/A	#N/A	#N/A	Grg1	IPR020100 (PFAM); IPR020100 (PANTHER)	#N/A	hypothetical protein Golomagni_04210 [Golovinomyces magnicellulatus]
aug-contig_10-processed-gene-11.114	MYIFGLGTSSLFAAGLSFLVFLTFLAGLIKVALNKRDLRKKIEQENLEAANKQTDREKLVGQREPDEGDLFGVRAIQAGFFGGVTQSCLNSPSSSRSSSVCSLGLHSNDVILPAPSAFRLEPPKPAHKKPQSGKSLETSLSNTTPRPYDATSPVEKGLGRPPLSINLNLTKSIPIVPITLEPVLKSTSGSVANHERPKSAKGDHSISRSETSNCSSPCSPLKKVSTAGNQPVSDSESPKENQKIDYSPTETTSIANFPRQISPTAIMRDSVVSKMQVSIHQPNGTPHEVAPEIKCRKSDDTYTYSVQSSATNSVFSQSEPLDPSTRTTPDIPGHKDHSSEEFHPGSCSTSSSNTQNLTNSKGDFHCQGSQTKSGHYLNDLPAVLQIRHNGGSNFNSYSP…	483	#N/A	#N/A	#N/A	#N/A	#N/A	#N/A	PTHR40623 (PANTHER)	#N/A	hypothetical protein GcM1_247114 [Golovinomyces cichoracearum]
aug-contig_10-processed-gene-11.116	MIAIGLEGSANKLGVGIISHPGDGQPAQILANIRHTFISPPGEGFQPKDTAKHHRSWIVKLVKQAIIESGLSVSQLDCICYTKGPGMGAPLQSVAIAARVLSLMWEKDLVAVNHCVGHIEMGREITGSQNPVVLYVSGGNTQIIAYAEQRYRIFGEALDIAVGNCLDRFARTLEISNDPAPGYNIEQLAKSGNLLLDLPYAVKGMDCSFSGILASIDQIAAELKADPEKRDSTSGEQITIEDLCFSLQETVFAMLVEITERAMSHVGTDQVLIVGGVGCNMRLQEMMKIMAQQRGGTVFATDERYCIDNGIMIAQAGLLAYETGFKTPVEDSICTQRFRTDEVLINWRS	349	Component of the EKC KEOPS complex that is required for the formation of a threonylcarbamoyl group on adenosine at position 37 (t(6)A37) in tRNAs that read codons beginning with adenine. The complex is probably involved in the transfer of the threonylcarbamoyl moiety of threonylcarbamoyl-AMP (TC-AMP) to the N6 group of A37. KAE1 likely plays a direct catalytic role in this reaction, but requires …	P:GO:0002949; C:GO:0000408; C:GO:0005737	P:tRNA threonylcarbamoyladenosine modification; C:EKC/KEOPS complex; C:cytoplasm	#N/A	#N/A	Peptidase_M22	IPR017861 (PRINTS); G3DSA:3.30.420.40:FF:000038 (FUNFAM); G3DSA:3.30.420.40:FF:000295 (FUNFAM); TIGR03722 (NCBIFAM); IPR000905 (PFAM); G3DSA:3.30.420.40 (GENE3D); IPR017861 (NCBIFAM); G3DSA:3.30.420.40 (GENE3D); IPR000905 (PANTHER); IPR034680 (HAMAP); cd24132 (CDD); IPR043129 (SUPERFAMILY)	O	tRNA N6-adenosine threonylcarbamoyltransferase [Golovinomyces cichoracearum] RKF80594.1 tRNA N6-adenosine threonylcarbamoyltransferase [Golovinomyces cichoracearum]
aug-contig_10-processed-gene-11.117	MGNNPSANSKSLNSSSNTSSVHDTSRIFTSRRDPRNLIHAQRTPVEPSFTQVLGTATTYRTPSSNSTPAASGSSNKDALNESKEESNIIIAHDQPSKPVDVPLLTSNSENIARIPKQNIESSELNPLQDTSYDLTRPPRLPLPIEEEVHTPGSPIISPADIETPLLDLELLENEALRRQTSNLSNSTIDEEDAEELGVDKTKAIVPVTFEWAHGGEKIYVTGTIFQWNKKHCLHPVKGRPGLFRAVINVRPGTHHIRFIKDTVMLCSPDLPTTVDFGNNLVNYIEVSADELLEDDKPSTSRYALQKPEVHAQSLSPQIQRDSNSPSKLNPETVKPLSKSRLIIPQNRYTSQIPQYLVDLDKSEDCIEYRNATAAIEKFPAPPSLPGFLGKPILNAATPL…	450	5'-AMP-activated protein kinase beta subunit, interation domain	P:GO:0007165; F:GO:0005515; F:GO:0019901; C:GO:0005634; C:GO:0005737; C:GO:0031588	P:signal transduction; F:protein binding; F:protein kinase binding; C:nucleus; C:cytoplasm; C:nucleotide-activated protein kinase complex	K07199	map04068,map04152,map04211,map04213,map04371,map04530,map04710,map04714,map04910,map04920,map04921,map04922,map04931,map04932,map05410	AMPK1_CBM,AMPKBI	G3DSA:2.60.40.10:FF:000562 (FUNFAM); G3DSA:6.20.250.60 (GENE3D); IPR013783 (G3DSA:2.60.40.GENE3D); IPR032640 (PFAM); IPR006828 (PFAM); IPR050827 (PANTHER); cd02859 (CDD); IPR014756 (SUPERFAMILY); IPR037256 (SUPERFAMILY)	G	SNF1 protein kinase subunit beta-3 [Golovinomyces cichoracearum]
aug-contig_10-processed-gene-12.120	MAEVDTTIPGGLEISRTEQKDESLALGPNHEEPKVSSEKKSKIIRKKKRPARPQVDPSMMTSEPPPQTGTIFNIWYNKWSGGDREDKYLSQTAAIGRCNVAKDTGYTKADKVSGSYFCLFFARGVCPKGHECEYLHRLPTIHDMFNPNVDVFGRDKHSDYRHDMGGVGSFMRQNRTIYVGRIHVTDDIEEVVARHFAEWGQIERIRVLNTRGVGFITYSNEANAQFAKEAMAHQSLDHNEILNVRWATADPNPMAQKREARRIEEQAAEAIRRALPAEFVAEIEGRDPEARKRKKIEGCFGLAGYEAPDDIYYARGAHAVNPIGRDGFELEEEQRLMIEADKIEMREEQSQENVIFSSSTLAALKSVQAAAVLKPKTKSSDPLVVYDSESERLSIQDVD…	485	Torus domain	F:GO:0003676; F:GO:0003723; F:GO:0017070; F:GO:0036002; F:GO:0046872; C:GO:0000974; C:GO:0071006; C:GO:0071007	F:nucleic acid binding; F:RNA binding; F:U6 snRNA binding; F:pre-mRNA binding; F:metal ion binding; C:Prp19 complex; C:U2-type catalytic step 1 spliceosome; C:U2-type catalytic step 2 spliceosome	#N/A	#N/A	RRM_1,Torus	G3DSA:3.30.70.330:FF:000249 (FUNFAM); IPR032297 (PFAM); IPR012677 (G3DSA:3.30.70.GENE3D); IPR000504 (PFAM); IPR039171 (PANTHER); IPR000504 (PROSITE_PROFILES); IPR000571 (PROSITE_PROFILES); IPR034181 (CDD); IPR035979 (SUPERFAMILY); IPR036855 (SUPERFAMILY)	A	hypothetical protein Golomagni_03040 [Golovinomyces magnicellulatus]
aug-contig_10-processed-gene-12.125	MTTRQFSTTAFTQFNKASCGSVAHHFGVSVPISKQKYVPSVGKYPKGFLVSGVNVGVKASNKSSPDLALLASEKLCTAAAVFTKNRFQAAPVTFSRQILKKRNNSGIQSVIVNSGCANAVTGKGGLEDAENMAAVTDTCFSQKSDSQGDRTIVMSTGVIGQRLPIQKILNGIPNAYQHLGSSHDHWMDAAQAICTTDTYPKLISKRFTLPSSPSIEYRIAGMAKGAGMIHPNMATLLGIIATDVPISPLLIQPILTAAVKDSFNSISVDGDTSTNDTVALLANGAAGGNEITSQSSAEYSAFQKVVTEFAIDLAKLVVRDGEGATKFVTIRVIESPTENGARKIASTIAKSPLVKTALYGKDANWGRIICAVGYSQVSEPGQSECDSMEIIPEKTSVSL…	1644	Integrase core domain	P:GO:0006526; P:GO:0006592; F:GO:0004042; F:GO:0004358; C:GO:0005759	P:L-arginine biosynthetic process; P:ornithine biosynthetic process; F:L-glutamate N-acetyltransferase activity; F:L-glutamate N-acetyltransferase activity, acting on acetyl-L-ornithine as donor; C:mitochondrial matrix	#N/A	#N/A	#N/A	G3DSA:3.60.70.12:FF:000001 (FUNFAM); G3DSA:3.30.2330.10:FF:000001 (FUNFAM); G3DSA:3.30.70.270:FF:000063 (FUNFAM); G3DSA:3.10.20.340:FF:000002 (FUNFAM); IPR043128 (G3DSA:3.30.70.GENE3D); IPR002813 (NCBIFAM); G3DSA:3.60.70.12 (GENE3D); IPR002813 (PFAM); IPR043128 (G3DSA:3.30.70.GENE3D); NF003802 (NCBIFAM); G3DSA:3.10.10.10 (GENE3D); IPR042195 (G3DSA:3.10.20.GENE3D); G3DSA:3.30.2330.10 (GENE3D); IPR…	#N/A	hypothetical protein K3495_g11619 [Podosphaera aphanis]
aug-contig_10-processed-gene-13.25	MRAKPCLKVSILTDALRGTRESPSSSCASLLAPLVEEFGPGRVDIRMYHTPNLTGIKKYCIPKRINEGWGLQHIKLYGFDDQIIVSGLVSRTLKNERNTEIYRANLSSEYFTNRQDRYHLFSSKDLTDYFFRLHTILSKLSFQILPNSHSLNKYTLEWPISNLAPSPLISPLDYISKSSKLLSEDSLSKSDQVISNKSDTSDTVVYPIVQLTPFSSTIDPSTELVAIKSILSTLTSPRYSKTSWTFTAGYFNPIPELTQLLISTASKSNTIITASPWANGFYGSKGVSRLIPCAYTLLLRRFLEAVKRKNRERDIIVKEWRLGTAGKPNGWTYHSKGLWISLEQKSTQRSSVDISIIGSSNYTKRSYSLDLEAGVIIVTENKDLSMQLGLERDNIERFA…	432	cdp-diacylglycerol-glycerol-3-phosphate 3-phosphatidyltransferase	P:GO:0032049; F:GO:0008444; C:GO:0005739	P:cardiolipin biosynthetic process; F:CDP-diacylglycerol-glycerol-3-phosphate 3-phosphatidyltransferase activity; C:mitochondrion	K00995	map00564,map01100	PLDc,PLDc_2	G3DSA:3.30.870.10 (GENE3D); PIRSF000850 (PIRSF); G3DSA:3.30.870.10 (GENE3D); IPR016270 (PANTHER); cd09137 (CDD); SSF56024 (SUPERFAMILY)	I	CDP-diacylglycerol--glycerol-3-phosphate 3-phosphatidyltransferase [Golovinomyces cichoracearum]
aug-contig_10-processed-gene-14.135	MSTALPGFVQQGRDNLVRNVRGMWDGMRPRDYIRIVVVVGAYLLLRPYLLKYAAKIQAREHAKHAFDPNKPISNSKISPNQLRDGRITEIDENEQSEAEGDGIANGAGWGTKTRKRQRRVDMKAIEDEERRKLQMEGAKDDQDIMQYLVDYEEGKDGW	158	Protein trafficking PGA2	P:GO:0015031	P:protein transport	#N/A	#N/A	PGA2	IPR011431 (PFAM); IPR011431 (PANTHER)	U	putative trafficking pga2 [Golovinomyces cichoracearum]
aug-contig_10-processed-gene-14.144	MTDLDGSDVTERLKATLWHNIGTLVTSEAQRLSNQHEVPISATPQFIGALTEMVWIQIENVAMDLEAFARHAGRSTIGTDDVLLLTRRNEALEGVLREWIEAEVQRKMNGAGKKTDSKAKGRVNKKK	127	CENP-S protein	P:GO:0000712; P:GO:0031297; F:GO:0003682; F:GO:0046982; C:GO:0071821	P:resolution of meiotic recombination intermediates; P:replication fork processing; F:chromatin binding; F:protein heterodimerization activity; C:FANCM-MHF complex	#N/A	#N/A	CENP-S	IPR009072 (G3DSA:1.10.20.GENE3D); IPR029003 (PFAM); PTHR22980 (PANTHER); cd22919 (CDD); IPR009072 (SUPERFAMILY)	#N/A	Inner kinetochore subunit mhf1 [Golovinomyces cichoracearum]
aug-contig_10-processed-gene-15.16	MDPFSFCSSDTLDIPVHIKIVSLDGEQTQIPFSTLIQRPDLRHVGSNLSPYSDLFVTVQPWADSKPLSVPVQTEYKPFKNERRWNEWLTLPINYSTLPLSTQLAITVWDLSPNGGKRACGHAIPFGGTTLPMFDNENQLQKGRQKCHLHNRKIADGLNATKTPSTIPRTKNNGKNVDHQFLDSDSEEMDRLEKLLKKHEMGEIPRVEWLDQLVFRGIEKRAQDASRTSIKDFRRGISRSSTSSMSYNSPDFKNSAWTEETDSVHTEFGNFTLNIELSRFDFPVVFTDFEYPRPPISSLQNLSSSQANFPVKQPPEVHYGPGINGPEERDFASRLKVYDPEVGARDNPAESKHRRLVRSHRTGVVDRDLKPNAKVRDELNRIVAYAPTHQLSPDEKDLIW…	918	Belongs to the PI3 PI4-kinase family	P:GO:0000045; P:GO:0006897; P:GO:0030242; P:GO:0036092; P:GO:0046854; P:GO:0048015; F:GO:0016303; F:GO:0052742; C:GO:0000407; C:GO:0005737; C:GO:0005768; C:GO:0005777; C:GO:0016020; C:GO:0034271; C:GO:0034272	P:autophagosome assembly; P:endocytosis; P:autophagy of peroxisome; P:phosphatidylinositol-3-phosphate biosynthetic process; P:phosphatidylinositol phosphate biosynthetic process; P:phosphatidylinositol-mediated signaling; F:1-phosphatidylinositol-3-kinase activity; F:phosphatidylinositol kinase activity; C:phagophore assembly site; C:cytoplasm; C:endosome; C:peroxisome; C:membrane; C:phosphatidy…	K00914	map00562,map01100,map04070,map04136,map04138,map04140,map04145,map04371,map05152,map05167	PI3K_C2,PI3Ka,PI3_PI4_kinase	G3DSA:3.30.1010.10:FF:000002 (FUNFAM); G3DSA:1.10.1070.11:FF:000002 (FUNFAM); G3DSA:1.25.40.70:FF:000009 (FUNFAM); IPR008290 (PIRSF); IPR001263 (PFAM); IPR035892 (G3DSA:2.60.40.GENE3D); G3DSA:3.30.1010.10 (GENE3D); IPR042236 (G3DSA:1.25.40.GENE3D); IPR000403 (PFAM); IPR002420 (PFAM); IPR036940 (G3DSA:1.10.1070.GENE3D); IPR015433 (PANTHER); IPR000403 (PROSITE_PROFILES); IPR002420 (PROSITE_PROFILES…	TU	Phosphatidylinositol 3-kinase, root isoform [Golovinomyces cichoracearum]
aug-contig_10-processed-gene-15.18	MKSVNRQFGKLMRKNHGDTTNIAVLLNDYEEAEKILSKFIEACKAWRDSWISILSVQLASTSMFKELYDPIIGTNERNGPEPIATPVEKLDRIQKLQLVQSELKPDLLEEVKMIDCIIIKSAVNAKELIQPLKKIIKKRENKRLDWEMCVNRVDGYLKKMKRTDRENSALTKAEEDMAQAASVPDDHLREILPPIISAAVSILPYLAETQIMVQTSLLAQSYTALHNFLEEVGLQISLTSIEEIVELWSKDFNPIQKRVEAIDCIARGKSIHQPTTYHSKGSTIIRHNPRSDIQSRRPSSNTTVSSQHSVPMIETRSLHVSSSKSQRTSPISPTSPQERCTALPSKYASRENSSQISSNSNNYNHSPIATSVDHIKRVPAEKKRPPPPPPPKRITSQKP…	457	BAR domain	P:GO:0006897; P:GO:0051666; P:GO:0097320; F:GO:0005515; F:GO:0008289; C:GO:0015629; C:GO:0030479; C:GO:0031097; C:GO:0043332; C:GO:1990528	P:endocytosis; P:actin cortical patch localization; P:plasma membrane tubulation; F:protein binding; F:lipid binding; C:actin cytoskeleton; C:actin cortical patch; C:medial cortex; C:mating projection tip; C:Rvs161p-Rvs167p complex	#N/A	#N/A	BAR,SH3_1,SH3_9	IPR001452 (PRINTS); G3DSA:2.30.30.40:FF:000100 (FUNFAM); IPR027267 (G3DSA:1.20.1270.GENE3D); IPR001452 (PFAM); G3DSA:2.30.30.40 (GENE3D); IPR046982 (PANTHER); IPR001452 (PROSITE_PROFILES); cd07599 (CDD); IPR036028 (SUPERFAMILY); IPR027267 (SUPERFAMILY)	#N/A	hypothetical protein Golomagni_01967 [Golovinomyces magnicellulatus]
aug-contig_10-processed-gene-15.21	MDQNHPTGSTQPLLTYFAKPRDLGSVQQSPQEEKLPEQQPSQIVEENKPSHQEQPPPSQQDIQEVRITESLSPRAPKYHDTFGETPRRRTYRDYHRSQIDVAEQEYRTRYNSAPTESSFVGKPIHSPSRRSHQAQRGDFTSSGSTVNVFKDQHKDKLISTWPTVDISKTDKKSLPNKAPTESSVDQPEQSSEMGFYESGSRKECGRTAAEPAYTHNTVTIPCHHIRVGDLLFLQGRPCQVIRITTSAATGQHRYLGVDLFTKQLHEESSFISNPSPSVVVQTMLGPVFKQYRVLDLHESSVVAMTETGDVKQSIPVIDQSGLKERLAEAFETGRGSVRVLVISDGGRDLAVDMKVIHGSRL	361	Eukaryotic elongation factor 5A hypusine, DNA-binding OB fold	P:GO:0045901; F:GO:0003723; F:GO:0003746; F:GO:0043022	P:positive regulation of translational elongation; F:RNA binding; F:translation elongation factor activity; F:ribosome binding	#N/A	#N/A	#N/A	G3DSA:2.30.30.30:FF:000033 (FUNFAM); IPR048670 (PFAM); IPR012340 (G3DSA:2.40.50.GENE3D); IPR014722 (G3DSA:2.30.30.GENE3D); IPR001884 (PANTHER); IPR037318 (CDD); IPR008991 (SUPERFAMILY); IPR012340 (SUPERFAMILY)	#N/A	putative nuclear protein qri2 nse4 [Golovinomyces cichoracearum]
aug-contig_10-processed-gene-15.27	MVYDDGSNFVGDSYWQENSELKEGEELSLERNGVLVEVGEYMGKRDQDLNELVDCRARIREIGTFINSTSESFSRSPAEAVQRKNNESNFPRPNAVNLVTPNGQSSKELTSEYVKNNKPEDKAESFVQRPIGHELWNKRRKHNISPTRKSSYTQNLTGTRVVLTSTPSCSIPINYKPIKVKRVTSNSSRVIVDLTNEDEKNQPDNLGKEREEITSISNQTCKFQKKAPSFHVPNSGYASKLAGANLTISSPGFLPQKHTESKIMENSGNIPQEILNLRAPVPASTRLNENTLFFGENVVRGSEVPSVISPKTHPEKRKSSNSLESTLSHTLVKKKDYSRESRTRSVIQKSDLPSCKASLPAASEPNIILKNSDTNCYTTNQSKVLMTKSSRDRPKSILR…	704	Protein of unknown function (DUF2439)	#N/A	#N/A	#N/A	#N/A	#N/A	IPR018838 (PFAM)	#N/A	hypothetical protein Golomagni_01968 [Golovinomyces magnicellulatus]
aug-contig_10-processed-gene-17.179	MTNIPEGQDSKTLYKAMYMSKKKDDDNLSNVSYSQVRDLNPLATDSDGLRAIVEVFIEDYKEKNLQDFALWETFKDDFSVWTCEMWDKVGLCSLRRDMRDLLISNGVRLPVHYGGTSKMTMSKSLVDLVQTDSWPTLTKEMIDWGSRQGFEMDSPSIRRIENGQSPEWTSEELRQIREQKRQQKQLQNNDSKTISPYAFKKSIGKEEYCKFDPPEDISYDANQQIQDEEKRLDELRRLRLFEAEKCRLFKEEEEQTKPYYVQGVSNTYASTGRKSLPYLASNDVRNTWNNSDRSNYDIKIPKNQRERRPHFDSQPQITDNYHEKENWSLANFSKIAANVERTLSNENKYEGTGDNFGYKIRIFKDVCRRMGLPHSQYMRAFPGMLKGIALSHYHSGNLA…	1773	Encoded by	P:GO:0015074; F:GO:0003676	P:DNA integration; F:nucleic acid binding	#N/A	#N/A	RVT_2,rve	IPR001584 (PFAM); IPR036397 (G3DSA:3.30.420.GENE3D); IPR001584 (PROSITE_PROFILES); IPR012337 (SUPERFAMILY)	L	hypothetical protein B7463_g10820, partial [Scytalidium lignicola]
aug-contig_10-processed-gene-18.141	MHSYQMVRALLKGYLPSTEQIVINLKILLSSDFLNPDTIEMISESIKTVGKLLMTNSDFRNFLHDLNIIGRQIFAETSHVLSQTTEVAANTIEQNTEAVEDLNNLESTKESDESKHKIDSGAGKISAVIANGTKESSLGFQESVRQNFSGDQKKVLLYRLRNTVTKLRQRSDYSDSVNMISILIKRCAQIYSRGVDQTISTLQNNINSNKSLELAIKNVWSLLNSIGDREAWIELQKRFNNCMEHLNKDPDFEFFCVEVSERVKQIFTDPNFFDTGKDIFDILSLNDHNTSTNRNLKEDMNDLISQIHTTFESMMNDLDVSQLLEVTHRIIHTIFLNENSVNPQLLTDIYTYFLPHYVQAIQYIPIPRLEIAVPEMDILIENLILEPGHTVNQSSFFPF…	642	#N/A	F:GO:0008289	F:lipid binding	#N/A	#N/A	DUF4449	IPR045967 (PFAM); G3DSA:3.15.10.10 (GENE3D); PTHR31138 (PANTHER); IPR017943 (SUPERFAMILY)	#N/A	putative bactericidal permeability-increasing protein [Golovinomyces cichoracearum]
aug-contig_10-processed-gene-18.143	MPGPLVCAVNAYVVSTALYGAEAWWPGLTRITMKRDKKVSTGVGCHTRLLDRTFLTAIRASLPVWRTTLNTVLHRESGILPTEIILQQKQLRSTARIHRLDSYHPMSLRANELPKDAIKRLKLRKCQNDRVFRVLEQYQTRLQNANLILPVLEAPGELRQSSNIRATARAKCNKKEKAKQFKIWLRNLPAGTLCVYSDGSSSGPAVSAYGYAVYKNGEILASGGKLLLGAEVYDAEIAGAIRGLETALEIGDSTDIKVFLDNQEAAEALGSGRTSSSLQVVRKFKELCSTHPTVEVRWIPGHRGIYGNEKADMLVKRALATITRDRNSPTSEDMCREHQNIFTFATLKRQVTISTQKLVEEWWLKNRTARYEDLDLLMRRKRPPELDFPRWAYHRVIAA…	471	Ribonuclease H protein	F:GO:0003676; F:GO:0004523	F:nucleic acid binding; F:RNA-DNA hybrid ribonuclease activity	#N/A	#N/A	RNase_H,RVT_1	IPR036397 (G3DSA:3.30.420.GENE3D); IPR002156 (PFAM); PTHR33481 (PANTHER); IPR002156 (PROSITE_PROFILES); cd09276 (CDD); IPR012337 (SUPERFAMILY)	#N/A	hypothetical protein K3495_g8968 [Podosphaera aphanis]
aug-contig_10-processed-gene-19.1	MSTNLEAPTSSVSHDIHTQTISTFVQNIFQKYGLSEIAITDIDEKKFGSSVIDLENTTKGELASTIITYITYYVDQDLYNEELFWEFKQDFIGWKRHHFDTAGILKKDLKRILLERGIFVASKGYADSLALEMVINEKEIHVWTTEEIKTVLKRNINYHPKIDIIVKFVKCFDNKKRYTGEPYDILEDKTRIFLALAENMNIRPGQLHAVFPRILTGRAEWYFLNHMRPYDMFSTMYVQLKQHFDTEVNHEHYYTDWTTTSFDKLRQEFSSESLHQILQRLFDKLLLCQRALGPAYAGQQPLKTTLIRACRGIPELEFALFRPADNVEKLFSELRSSLQTTLSRNSQHLIFDGESYENNQSGSSKDSEQFYFDRRFTSNRNKFQNRFQTRFQPQTSSQI…	1632	Encoded by	P:GO:0015074; F:GO:0003676	P:DNA integration; F:nucleic acid binding	#N/A	#N/A	RVT_2	IPR036397 (G3DSA:3.30.420.GENE3D); IPR013103 (PFAM); IPR050951 (PANTHER); IPR001584 (PROSITE_PROFILES); IPR012337 (SUPERFAMILY)	L	Med15 multi-domain protein [Pyrenophora tritici-repentis] KAF7572320.1 Med15 multi-domain protein [Pyrenophora tritici-repentis]
aug-contig_10-processed-gene-19.5	MALEQALSTSSVKKRRIAIMTSGGDSPGMNAVVRAVVRYTIERGCEAYCIYEGYEGLVKGNDLIRRMEWSDVRGWLSEGGTLIGTARCMSFYERYGRLLGAKNMILNGIDALIICGGDGSLTGADKLRYEWPSLLKELVETKQLTQAQVDPFQHLNIVGIVGSIDNDMSGTDATIGCFSALRRICEMVDYIEATASSHSRAFVIEVMGRHCGWLALMAGVATGADFVFIPEKQRAGNWREEMSKIVKKQRDYGKRKTIVIVAEGAQDYQGQKISPEMVRDLLADKNGLALDTRITTLGHVQRGGQACAFDRYLATVQGVEAVNAVLEATPDTPTPFIAITENKITRKPLVQAVLDTMEVAKAIKAKDFDRAMSLRDTEFFDLYNSYMTTTSPGLNSHMQ…	793	Catalyzes the phosphorylation of D-fructose 6-phosphate to fructose 1,6-bisphosphate by ATP, the first committing step of glycolysis	P:GO:0006002; P:GO:0006096; P:GO:0030388; P:GO:0061621; F:GO:0003872; F:GO:0005524; F:GO:0016208; F:GO:0042802; F:GO:0048029; F:GO:0070095; C:GO:0005737; C:GO:0005739; C:GO:0005945	P:fructose 6-phosphate metabolic process; P:glycolytic process; P:fructose 1,6-bisphosphate metabolic process; P:canonical glycolysis; F:6-phosphofructokinase activity; F:ATP binding; F:AMP binding; F:identical protein binding; F:monosaccharide binding; F:fructose-6-phosphate binding; C:cytoplasm; C:mitochondrion; C:6-phosphofructokinase complex	K00850	map00010,map00030,map00051,map00052,map00680,map01100,map01110,map01120,map01130,map01200,map01230,map03018,map04152,map05230	PFK	IPR022953 (PRINTS); G3DSA:3.40.50.460:FF:000008 (FUNFAM); G3DSA:3.40.50.460:FF:000007 (FUNFAM); G3DSA:3.40.50.450 (GENE3D); G3DSA:3.40.50.450 (GENE3D); IPR035966 (G3DSA:3.40.50.GENE3D); IPR035966 (G3DSA:3.40.50.GENE3D); IPR000023 (PFAM); IPR009161 (NCBIFAM); IPR009161 (PIRSF); PTHR13697 (PANTHER); IPR009161 (HAMAP); IPR035966 (SUPERFAMILY); IPR035966 (SUPERFAMILY)	G	ATP-dependent 6-phosphofructokinase [Golovinomyces cichoracearum]
aug-contig_10-processed-gene-19.9	MNSDKDSIKTDLLLSIGPVQTPSCHDDSLAESISRINFQRADVGGFRNLTEESLREEISGKKTKIDDNIESDSDSIEEEEVESDEPDRVKELSNARLELLGQIESAHQAAMFALDFVSLSLTKDLPAQATLTVSPELQKLVGMGTLGIDKLNVSRIAEPQKLEEKKIVMGLQAQSLSKTVDSILASVRGLEEEIELETKYWERILDISNKGWAICRLPSEKQTLGVRIGFSESSLAFQSRSLAALRRNSDGSVSLDQGIAKPEPQAIRVRIQSDGIETGSTAIPQLTPDNAAVEEFILQARSTIFAEELWQELQREARTLLAFGVSSTVNTITCILTPSKSAVIDLVSLFPNHSSSLPKLDDHLAEFIHLALHLNLRWAHRQARRRRAQSQPVLKPNSI…	689	Subunit 17 of Mediator complex	P:GO:0006357; F:GO:0003712; C:GO:0016592; C:GO:0070847	P:regulation of transcription by RNA polymerase II; F:transcription coregulator activity; C:mediator complex; C:core mediator complex	#N/A	#N/A	Med17	IPR019313 (PFAM); G3DSA:6.10.250.2620 (GENE3D); IPR019313 (PANTHER)	K	Mediator of RNA polymerase II transcription subunit 17 [Golovinomyces cichoracearum]
aug-contig_10-processed-gene-2.8	MDKGKCLDSSFHEESRDKMDVDQVYSKNPGPSQNRNSLREPPPRTRLEPKDDVNSKSSFTPDRQLISSLISEQIQQAMIPLLTRINELGSAIGAPAHSSTLPTSQPLPEPTPTPQTSIRPQERRRFPTWSGERRNFNCFINEVQNCIEIDRHLMGSDRAVWYDINFSLPEAAKQKVSVFNGNGEKLNWDYRLFIDHIKRTFGNRQEREDKIELLSKIKQRENQRFSDFFPRFDEALAGAGGESWTEDSKVIWLRKALSESLTTQLIPVSLNFDDYHSSVRIIEDTAYRFEHSSLFKGSKAVSQSPGWLVPEHRPATTIRYDSDGDVVMNPMDSHQRTLRNSQVHGRSNGDQMRAQWVDQKEILRPKCPYLLPKRPEVETRISHTVIPPRVPELTDVALS…	1658	Integrase core domain	P:GO:0015074; F:GO:0003676	P:DNA integration; F:nucleic acid binding	#N/A	#N/A	Chromo,Peptidase_A2E,RVT_1,rve	G3DSA:3.30.70.270:FF:000020 (FUNFAM); G3DSA:1.10.340.70 (GENE3D); IPR043128 (G3DSA:3.30.70.GENE3D); G3DSA:3.10.10.10 (GENE3D); IPR036397 (G3DSA:3.30.420.GENE3D); IPR043128 (G3DSA:3.30.70.GENE3D); IPR041588 (PFAM); IPR021109 (G3DSA:2.40.70.GENE3D); G3DSA:2.40.50.40 (GENE3D); IPR041373 (PFAM); IPR000477 (PFAM); IPR050951 (PANTHER); IPR001584 (PROSITE_PROFILES); IPR000953 (PROSITE_PROFILES); IPR0004…	L	hypothetical protein K3495_g12212 [Podosphaera aphanis]
aug-contig_10-processed-gene-20.137	MNQTQPITSSPVPNRLNRDQRLQIKTLHESGMNQTRIADQLGVTRRQVRYTLSVPYLEPKKAPGRLPTLSHEDVDKIEDFITASPEGRRMSWLELASGPFQHLGVSEFVIQNELKKRGYRRRPSFKKPFLSEVNRRKRLEWAEARKDWTDEDWMNILWTDETWVTGGRRKRDWIGEKVDINCITEKLRKDFGWMFWGCIAGTEQGASLFWEKEWGIITSDTYSQRIVPLIHGMVSMKPQLSVMQDNAPAHTSAVTMNELRERSIITINWPPFSPDLNPIEHVWGSMKDYIQYHYPRLDRGRQRSHDKLRDIVKEAWNDATKPENLEKLIRSMHRRCEAMDQSQSPPSTPLSKRLTRNQCIQIKTLHDAGMNQTKIATHLQISRKQVGHSLRRGSVTPKK…	690	Encoded by	P:GO:0006313; P:GO:0015074; F:GO:0003676; F:GO:0003677	P:DNA transposition; P:DNA integration; F:nucleic acid binding; F:DNA binding	#N/A	#N/A	#N/A	IPR036397 (G3DSA:3.30.420.GENE3D); IPR038717 (PFAM); IPR002492 (PFAM); IPR052338 (PANTHER); IPR009057 (SUPERFAMILY)	#N/A	hypothetical protein K3495_g12851 [Podosphaera aphanis]
aug-contig_10-processed-gene-20.139	MASAPHFSANPSNGVIILKGTQNYLEWLYTIKMASNGSSETDIKNVWKYIDPKISTKPSVPVVPTRPTPADINPTAMTVSKLTPIELEDFKYRNIIWREQKFDVQEIERRLEAVQNKILGSISETLIPQLKSSTTVVDILQHLNDKFRPSDQARKQEVILKRNSLKIIPANREILSWLDQWEMVYEEAKELKLSVVESPQAQYDFLFAVRSIDEAWVTTNLVAIGMDLEYNRIISDFFGYVKEFRQHQRLNEIYARKTEFSNFTDSSGAFSAIRQDGNDNSISLPSTIHKGRKQNGEKVCLCGQSHLYEKCFYINYANTKRPSNFKYRQEIFDKINEKLQPNSMENLRRNLKSKFNYDPQSTPSRALKSDFVGIIQKGNYLDSHSNDMGAFTTHLRQHS…	1597	Encoded by	P:GO:0015074; F:GO:0003676	P:DNA integration; F:nucleic acid binding	#N/A	#N/A	RVT_2,gag_pre-integrs,rve	IPR013103 (PFAM); IPR054722 (PFAM); IPR036397 (G3DSA:3.30.420.GENE3D); PTHR11439 (PANTHER); IPR001584 (PROSITE_PROFILES); cd09272 (CDD); IPR012337 (SUPERFAMILY); IPR043502 (SUPERFAMILY)	L	hypothetical protein K3495_g11344 [Podosphaera aphanis]
aug-contig_10-processed-gene-20.151	MKFPCLDALESRTQFLEARSLSSGPEPTYTSGATLMYHSKDPLFLDWGGVLREFNIAYESWGKINTDRSNVILLHTGLSASSHAHSTATNPQSGWWEKFIGSGRCLDTDKYHIICTNVLGGCYGSTGPSSIDPADGQRFATKFPILTIQDMVRAQFRLLDELRVEKLYASVGSSMGGMQSLAAAVLYPDRVSRIVSISGCARSHPYGIAMRHTQRQVLMMDPKWNRGFYYDNVPPHAGMKLAREIATITYRSGPEWEQRFGRRRADPRKLPALCPDFLVETYLDHSGEKFCLSFDANSLLYVSKAIDLFDIRGSAQTEQVVTEDIGDEQVNHGLVLPKVSFKEQPESTVDMNHKNVRSSTKIPLPDISLAFKSLSNHPTLIMGVESDILFPTWQQKEIV…	443	alpha/beta hydrolase fold	P:GO:0006535; P:GO:0009058; P:GO:0009086; P:GO:0009092; F:GO:0004414; F:GO:0009001; F:GO:0016747; C:GO:0005739	P:cysteine biosynthetic process from serine; P:biosynthetic process; P:methionine biosynthetic process; P:homoserine metabolic process; F:homoserine O-acetyltransferase activity; F:serine O-acetyltransferase activity; F:acyltransferase activity, transferring groups other than amino-acyl groups; C:mitochondrion	K00641	map00270,map01100,map01130	Abhydrolase_1	IPR029058 (G3DSA:3.40.50.GENE3D); IPR008220 (NCBIFAM); NF001209 (NCBIFAM); IPR008220 (PIRSF); IPR000073 (PFAM); IPR008220 (PANTHER); IPR008220 (HAMAP); IPR029058 (SUPERFAMILY)	H	hypothetical protein Golomagni_03451 [Golovinomyces magnicellulatus]
aug-contig_10-processed-gene-22.11	MAGENVGVAEKGQNNKTRQNTTTEQNASKETVANLPIDKNMEIIRNLLKKLRKVYTGEGTEKDLPSENDVAEAVKAFNAHKREWDQTRANTTPIEERMSALEEVVRKSLVDSAQKANSTAVSGPPAPKTYASVVAPPMSKTAVRIRVEGAKDLQPTELLQMAKEHIPGAYAVRQMRSNDTEVFVQSASQRDAALNMTQPTDFKILRHDFPVEVCGVPLRTKIEGGKNANNNRLILEIVNATMVRIPNLKINRIRWLHDGKEVERAKKNGHTRGSVILSLPSETLQEQVVRNGIVIDAMLYTAQVWSPRAQPKQCYNCSQWGHTQASCGKKAQCGECAGAHQTRDCPRKRVSCCNCGKEHRSWQRGACRTYQVYKGSVQKARLELLERTAEIRKEKVPMM…	473	Encoded by	F:GO:0003676; F:GO:0008270	F:nucleic acid binding; F:zinc ion binding	#N/A	#N/A	#N/A	IPR001878 (PROSITE_PROFILES)	#N/A	AIR1 domain-containing protein [Blumeria hordei DH14]
aug-contig_10-processed-gene-22.16	MEESLLLDFPNGECAPLPDSTIFSSEAEAFGWAQRQASTGGYAFSNLYKNKSKVTGDIILSCYNCDKGPKTYQNKPTTTSKSKQRDGTGSKKCGCQYKITIKPNESKKWVIIPKKSHNHGRNSSSIAHPAHRIAALQNTLRAEILNAANSGSSISQIMSAFREREGFNLIGKDISNIIQKERQKQLGGMTPLQWLLKELQDNGYNTRFETKDGNILSKLMYLHPQAIQLWKDHPDVLLMDCTYKTNRFNMPILNICGVTGGNKVIQLGLVFLSSEKENDYSWVLQQLKQIMTLEAIRAPLSIVTDRELALMKSLEAHFSDTPHLLCRWHVNMNVLAKSKKYFPKPTKKGNSYVRSPIFVEFLKQWNAVLAATSEETYKQEVAKLEAMAPKDAYIYVERT…	713	#N/A	#N/A	#N/A	#N/A	#N/A	MULE	IPR018289 (PFAM); IPR052579 (PANTHER); cd07177 (CDD)	#N/A	hypothetical protein K3495_g3010 [Podosphaera aphanis]
aug-contig_10-processed-gene-22.9	MALSPQKDNKVSNESQSILSATQLEDLYQEEFNPNLHTTSTIRQFCDYAFSVYADNKLVESTPASQFSLDFSLFKENDLDKIRKEDISKYRQFLRRNGVYVSVRHFVKISKAFADMIQEGVPWPNDDPDRPIQQHKQENPPPRQQTPTGIQSNQQDNQSQIHDRNNLKTSQIHSPERTFHQNLLPLSHDNPIARNAPQMLPTPEEMIRQRFQTNQYSREVTTLLKMYQEDHKYGGEPTESFNYKFGLFIDLSTKASLPNEALPIAFSSMLRGIALEFYHSNFHSLNLSIPNLSIISRIISKVTNIAKKCYKGLVFNEMVQHLRSIQRGLDREFQTDVAIRNKVISAVSNIPACSSAILQPVSSLSALGNNIYTAIENHEAAIKADQLDNSNSMPNSYFT…	1444	Encoded by	#N/A	#N/A	#N/A	#N/A	RVT_2,rve	IPR013103 (PFAM); IPR012337 (SUPERFAMILY)	L	hypothetical protein K3495_g12054 [Podosphaera aphanis]
aug-contig_10-processed-gene-23.136	MQHHPHHHAPQQGPPPHHLQQPRPSSIVHQQHHTQQAPPTQPQHTNPYPNHSGLPQYTPGAPTSGTHLSQEAPYYQSHPSPYSTPASGTYSSTETPEIMAAAQMGPRPYPPITYHTPQSNSPASVASPSGHDQHRMYGAPQPQMQQNTQIYYTGPQQQYPPMPSQNGPSYPPHPQNHHQPMTNQTNLMMTHGSGQHPMQQHQGQHPQQGITGSPRPKIEPHNPQIPRPVIPQQQQQQQQQQQQQQQQQQQLPTNGSLLNKNNIQTNSGVAGVNPNAAPGPIPATTPLVVRQDNNGVQWIAFEYSRDRVKMEYTIRCDVETVNVETLSPEFKTENCVYPRACCSKEQYRGNRLVYETECNTVGWALAELNPCLRSKRGLIQRAVDSWRNSNQNERLRSRR…	762	Ribosomal protein L24e	#N/A	#N/A	#N/A	#N/A	#N/A	PTHR22949 (PANTHER)	J	ribosomal protein L24E [Golovinomyces cichoracearum]
aug-contig_10-processed-gene-24.37	MEHLAGPQRSAEALATRNADLNAATEQAADEIEIDSENDASSSDAGYETDSAGSVSTSLSSSVRDYAFENGRRYHRFREGAYNFPNDDLEQEREDMKHAMMVNLCGSRLHFAPIDTNPQNILDIGTGTGIWAIEMGDLYPGAKILGVDLSPIQPEWVPPNVTFMVDDVESPWLKPRDYYDYIHARHIVMAIRDWPQLLQRAYDHLKPGGWIELQEIHHYPQSKDESMPANYLVTQFWELINEALTVLGIDFNATQLLEHRMREAGFINVSCKILHVPIGVWPKNGILKLVGLYWRTILIDGLQPIALGPLTRGLKWTKEQVDVWLVDVRKAYMDSRVHSHMPLYLIWGQKPKIEGVQ	357	Methyltransferase	F:GO:0008168	F:methyltransferase activity	#N/A	#N/A	Methyltransf_23,Methyltransf_25,Methyltransf_31	PF13489 (PFAM); IPR029063 (G3DSA:3.40.50.GENE3D); PTHR43591 (PANTHER); cd02440 (CDD); IPR029063 (SUPERFAMILY)	H	Secondary metabolism regulator LAE1 [Golovinomyces cichoracearum]
aug-contig_10-processed-gene-25.31	MAQIFTHHEAGNSRKYIVEFLGVTLGQVAYTLRSGHLFPKKSKGASPKLNAKQVEELEAFVYSSHETRQMSSLDFASKFPNWNVGEGAIKNTLIKRGYAQFLSRNKAPLLEESKSICKAWAVAHLHYTQED	131	Encoded by	#N/A	#N/A	#N/A	#N/A	#N/A	#N/A	#N/A	hypothetical protein K3495_g12985 [Podosphaera aphanis]
aug-contig_10-processed-gene-25.36	MSYRVPDSPNTLSRSNSTTNSFFSVQALENYTKPMKDMDMNIPTEQGPSDLKIPRLLPSHLWNLPYITYSPEILEAASIIDGERVSELFASSVTQNTNISPQARNRLPLQPITPFDGKPANLRSFCSQLVNQIQGEYSITELEKVRFAYQCLGPGSLAKMRPSFRCLEDSSIPPEITTLDEFIAALKQRCEDPSLRDQATTRVEGLYQKTLKFHDFITAFEDDMSDSIYSTMNKSQWKLMLERRLSPQLRNLILTASDVPQDYHAFVAYLRTKDAGLQEIIASSKPPRSHLPLTNHTPAPKTPPTTTHFQPLSANYDLPISQGGSAMDLDTISRKKGLDGHLTLEAKNARRALGRCLRCNKPGHLAINCPLQNANIIAVSEVNPAAPDLDSLKD	394	Zinc finger CCHC domain-containing protein 5-like	F:GO:0003676; F:GO:0008270	F:nucleic acid binding; F:zinc ion binding	#N/A	#N/A	#N/A	IPR001878 (PROSITE_PROFILES); IPR036875 (SUPERFAMILY)	#N/A	hypothetical protein EV44_g4484 [Erysiphe necator]
aug-contig_10-processed-gene-25.40	MSQTNGLTKLAFSRTWHHISASNPHFKLSTIRPLPTSSTDPSISPPSLGRLASRIAVLLMGKHKPIWDPATDCGDYVVVTDCAQLHTTGKKRWQKKYYRHNTRPGSLKTLSMDELIAKQGASEVLRKAVSGMLPKNRLRDDRLGRLKAFEGKKHPYNANIVRFAGQKLADISFPSPNKVG	180	ribosomal protein L13	P:GO:0006412; P:GO:0017148; F:GO:0003729; F:GO:0003735; C:GO:0005762; C:GO:0005840	P:translation; P:negative regulation of translation; F:mRNA binding; F:structural constituent of ribosome; C:mitochondrial large ribosomal subunit; C:ribosome	K02871	map03010	Ribosomal_L13	G3DSA:3.90.1180.10:FF:000007 (FUNFAM); IPR005823 (NCBIFAM); IPR005822 (PIRSF); IPR036899 (G3DSA:3.90.1180.GENE3D); IPR005822 (PFAM); IPR005822 (PANTHER); IPR005822 (HAMAP); IPR005822 (CDD); IPR036899 (SUPERFAMILY)	J	54S ribosomal protein L23, mitochondrial [Golovinomyces cichoracearum]
aug-contig_10-processed-gene-26.10	MSLKQEIETWVAALNLYDNNQYEEAFEKFDPIMETSKILFNCGVIQATLGEHAKAVELYQRAVSLDQYLAVAYFQQGVSNFLLGDFEEALANFNDTLLYLRGNNMIDYVQLGLDFKLYSCEALFNRGLCYIYLKEKEAGMKDLSYAVKEKVVEDHNVIDEAISEEADGYTVFSIPVGTLYRPNQSKVKNLKTKDYLGKAQLIAASDRSDAFTGFTGYEIKNVARKSSIDDRPSEKLSYAATNLVKPGLSSKRPDSGNMFPPTPPPETEKSTSPAVSNSNGMNRAASVKNSLKPMPSRINTERLRNNDRDDQSPLKLQRSRTTVDSRNNSSRQQLSREQQMAPKSSIVNEEINPDDLYDMYSNTSRKESSRSYGRQQLSGSYNEENETYSDYDGDSFDEA…	518	PB1 domain	F:GO:0005515	F:protein binding	#N/A	#N/A	PB1,TPR_1,TPR_2,TPR_8	G3DSA:1.25.40.10:FF:000017 (FUNFAM); G3DSA:3.10.20.90 (GENE3D); IPR011990 (G3DSA:1.25.40.GENE3D); IPR019734 (PFAM); IPR051864 (PANTHER); IPR019734 (PROSITE_PROFILES); IPR053793 (PROSITE_PROFILES); SSF54277 (SUPERFAMILY); IPR011990 (SUPERFAMILY)	T	putative nadph oxidase regulator [Golovinomyces cichoracearum]
aug-contig_10-processed-gene-26.13	MHTESGLPLRYKRLTTDELKNGLVNDGEAMLIVNVSKSKVKASRIKNSAQSSVKKNRTRSKAKNQLVSDQISDLAHQDTYQNILEIPKSDTSSKLKVVKYVSRKTKSRRVQTSSKTIEAKPESVSVTSIRKTFSDWKDYNPKTSVNTEIQKVSDTVDLPADWKKILLNILNNATASDESERAVLTVLNKALSLSCSRLASKNPGWQKNVNEIETLDTTELSLVPIHSGDLNVPRLSYGLDRVLFNHGVYQLQDPRTRVFNFDPYLREIMPIAEFDFNALSQYITSSRDEFLLQKASKEKKKYVGSTSSMTDTLSHFHFLLSNWRPIEYGSLSGILPSKLKVCDYTAYSRAPVAIFLRYRDGSYAIDADKEYETSNILAMLGKAMEKLLTLSSEDFERYR…	886	Mitochondrial protein Pet127	P:GO:0000959; P:GO:0000964; C:GO:0005739; C:GO:0005740	P:mitochondrial RNA metabolic process; P:mitochondrial RNA 5'-end processing; C:mitochondrion; C:mitochondrial envelope	#N/A	#N/A	Pet127	IPR013943 (PFAM); IPR013943 (PANTHER)	#N/A	putative mrna degradation protein [Golovinomyces cichoracearum]
aug-contig_10-processed-gene-27.23	MASQLEPKSRQAIIERCTKETSVKLAINLDGGELPKEICIELMNGENNHATQISKSQIISINSGIGFLDHMLHALAKHAGWSLILKCIGDLYIDDHHTAEDVCLSLGDAFHTALGSKEGISRFGSAYAPLDEALSRAVIDISNRPYSVIDLGLKREKIGDLSCEMIPHCMHSFAQNARITLHVHCLHGDNDHHRSESAFKALALALRNTLTPRRKVEAGSKISKITNNKFPGKVQKSTSKTNLKQKRKSRIYTEKELSIPALNMITPVGVQKPKGKKKGKESMMTILSIVTAERNNQTESKMMKARQMEEIREARKAESKKKQEMKAAKFTDLKDSMRKKRKRISRDEEAGLSSEVATASNLKSRKNVSFV	371	Belongs to the imidazoleglycerol-phosphate dehydratase family	P:GO:0000105; F:GO:0004424	P:L-histidine biosynthetic process; F:imidazoleglycerol-phosphate dehydratase activity	K01693	map00340,map01100,map01110,map01230	#N/A	G3DSA:3.30.230.40:FF:000001 (FUNFAM); G3DSA:3.30.230.40:FF:000005 (FUNFAM); IPR038494 (G3DSA:3.30.230.GENE3D); IPR000807 (PFAM); IPR038494 (G3DSA:3.30.230.GENE3D); IPR000807 (PANTHER); IPR000807 (HAMAP); IPR000807 (CDD); IPR020568 (SUPERFAMILY); IPR020568 (SUPERFAMILY)	#N/A	hypothetical protein B7463_g9445, partial [Scytalidium lignicola]
aug-contig_10-processed-gene-27.29	MAAIELPEEFKEWKEIIDQTLWKKELSVPKEEVLTEELQNYVLSRACWYSRRKEVGVNLWESFQEDFGGWTENNLKQLKGVARDLMIFLRRRGVYVESSKRPVAKRLFEILQEEEPAEWSEYQLQKQKQTGGFLEPFDPEYAIFKPSENNPMVKPNTLKNPEHNPPRNPFEIGTQPNIQGPSTIQRSRERQEDIKYESSEKGLFQHDPQAPCPIEILTRLGYLEKYYNDKEKRYGGELYDILETKLKILYELCRKAGISKEYYHFAFSSMLTGRAQDYFFDSISDKNVSFNQMITLIKDKFETHSNRLEYLSRWRNTTLKLLINKYNTKSKEECFDILVEQLRKTQRALTIPHQHNNDPKLREILLIEQDFKLRDQLLSACQSIPECENALNDPKSTFE…	1612	Reverse transcriptase (RNA-dependent DNA polymerase)	P:GO:0015074; F:GO:0003676	P:DNA integration; F:nucleic acid binding	#N/A	#N/A	RVT_2,rve	IPR036397 (G3DSA:3.30.420.GENE3D); IPR001584 (PROSITE_PROFILES); IPR012337 (SUPERFAMILY)	L	hypothetical protein [Scandinavium sp.]
aug-contig_10-processed-gene-28.119	MLTWLMRGEKSEENVDSTDLHKDVPDTPAPLFVARAFKTALFGTPAPPGRSESESDMKDDSQKDEPTKSQTVTLTYKKPSSILMTPGTATTLKKKVSFGNHIVQKDQIIKADQSAKNSNINQKSNQNPLESNTQLTNQKTPLTYQLEKAREQKFRSEPAERALVTKNLTDTKERVYHKSQSECGNIIDDPGKYNTDSCEEDDATMDLNKPRSQSGKYWKSEFENYHQEARLEMRKLLSYKELARSFAKIKDERSIILAEKLKEEQQKVISMEETVTKLSAKLWATDAKGVERFDDESRILIKELARQTARAVQYKEQVEEFRKLMEHLEPYYSKIEKEGNIDNSFIGIEHHFNNGILILLSQIKKENKELTQKVEEAISLKEENEKLLAMTRDKDEIIY…	682	Spindle pole body formation-associated protein	#N/A	#N/A	#N/A	#N/A	#N/A	IPR021589 (PFAM)	#N/A	putative urease accessory protein [Golovinomyces cichoracearum]
aug-contig_10-processed-gene-28.121	MNEPDTTEDQIISLSTPNGKIHGDFPTFFTPTKHEALDNFAFPNQKDIDEKHQYINESTIENHPNRSARKKSVRALIERTLLGNISEEIEDDEDLADDIYDSDDREIPEDDIGEPKELTISKVTKNLNTKGGTKHPRRFEVESEPLTAYESYFNSNKGGYTTTSNNTLSSLELLDHEEYFNRYTNLENHNEIDLKDLELLHFDKFNQWQFELTQNFNLCLYGFGSKRFLLMQFADYLHQTQKNNEKSKIVVVNGHISNLTVRDIFKTLASAITGDILKFGSPADMLGTIFSLLDEDKHLDVTIVIHSIDGRALRRISNQNILARLSSHSQIHLIASADHPSFPLLWDSSIRSFYNFLFYDCTTFRAYNVEFDVVKEVHDILGRRGRRAGGKEGVTFVLK…	511	Origin recognition complex subunit 2	P:GO:0006260; F:GO:0003688; C:GO:0000808; C:GO:0005634; C:GO:0005664	P:DNA replication; F:DNA replication origin binding; C:origin recognition complex; C:nucleus; C:nuclear origin of replication recognition complex	K02604,K06199	map04110,map04111,map04113	ORC2	IPR056773 (PFAM); IPR056772 (PFAM); IPR007220 (PANTHER)	L	hypothetical protein Golomagni_00622 [Golovinomyces magnicellulatus]
aug-contig_10-processed-gene-28.126	MKGLKIYALAAFLVAIKGSIIGEIAKNPQVVEFPIKKIRRTSGPVSKDRLHRRGEVLAYLENHDTLYFFNISIGTPPQTLRLHLDTGSSDLWTNTPKSRLCSQESRPCKVTGTYNTNSSSTYKYIASDFNISYVDGSGAQGDYVNDDIMIGTTKIKNFQFGVGYRSSSSQGILGIGYPINEVQVGRARKKPYPNLSMRMVKDGLIKSNAYSIWLNDLDASTGSILFGGIDTAQYVGPLKTVPIQEVGGVHTEFLVTMTGLSLGNKVISNDMAQAVLLDSGSSLTYLPNYIVKSIYELLGASYDASEQAAYVPCSYAHSSITLNFTFSEPVIKVDMSELVIPISSSNNQFDDETSTCLFGIAPAGTGSSVLGDTFIRSAYLVFDLDNNQISMAQTNFNAT…	779	Belongs to the peptidase A1 family	P:GO:0006508; F:GO:0003676; F:GO:0004190	P:proteolysis; F:nucleic acid binding; F:aspartic-type endopeptidase activity	#N/A	#N/A	#N/A	IPR001461 (PRINTS); G3DSA:2.40.70.10:FF:000011 (FUNFAM); IPR021109 (G3DSA:2.40.70.GENE3D); IPR038717 (PFAM); IPR036397 (G3DSA:3.30.420.GENE3D); IPR021109 (G3DSA:2.40.70.GENE3D); IPR033121 (PFAM); PIRSR633144-1 (PIRSR); PIRSR609121-1 (PIRSR); PIRSR633144-2 (PIRSR); PIRSR601461-1 (PIRSR); IPR001461 (PANTHER); IPR033121 (PROSITE_PROFILES); IPR033876 (CDD); IPR021109 (SUPERFAMILY)	#N/A	hypothetical protein Golomagni_05231 [Golovinomyces magnicellulatus]
aug-contig_10-processed-gene-28.133	MEGYKYFCLTTEDVSRYRIFRPLKRENEAADELRTILSKTNSELRLRHQLRVKQVTIDGGRDWGLSSFQKFADAEEIEVIVSAPDNQYQNGVSERGIRFLQDAARCCSIQMKVPSIFGNYMLEMVCYTLNCSSQSPVPNHKTPWEVYWSQINEEKSVTKADHLWIPRTLCITHVDASHRILGEKLEANGTRSVFLGYRGKKNKLVWLLDGGRFLVTPHVTAYESVNPDLGWSADPREIVRSLPRHVQDRLKSRKIDYARNEDFNCPGEIVPDELLPRGRGRPKRVIQKPYDNINLVLESPSSVDNELSKVLSEETFSGDITSDKTCNVLSLHDAITGRKFVDLAEENVGETEMYVFQETRKALDKQEFCSKSDGDELFRLAVNYSNFQSYLASTSTDEP…	899	Reverse transcriptase (RNA-dependent DNA polymerase)	P:GO:0015074; F:GO:0003676	P:DNA integration; F:nucleic acid binding	#N/A	#N/A	#N/A	IPR013103 (PFAM); IPR036397 (G3DSA:3.30.420.GENE3D); PTHR11439 (PANTHER); IPR001584 (PROSITE_PROFILES); cd09272 (CDD); IPR043502 (SUPERFAMILY); IPR012337 (SUPERFAMILY)	#N/A	hypothetical protein K3495_g13133, partial [Podosphaera aphanis]
aug-contig_10-processed-gene-28.136	MDKSRAIFIDEQQFRNSEHHASSNHNPSGLERRDSNLSTLSLVEKVQMAHREVFSGPIGESVPSSLTSFAHRSRRADSNTSFSIFRNDEDAFMVLSDENAILDDEFDISDDENLISLDNENSQFKTSPEPSEYDLFVRRNSTRTNFSFQNREKRVRQKINIATKDLNVAIVGFQTSIFGYTIYSILCCLSIGLVYLVLRWIPSWRVLLVGKPCPLYNCDWVVIENQWGEFIIQEIIRKKYEYPISTIFGRLEKHHTHHLEDEDPIVNELQMLEYRYMRFLFHPYEDKFVLVDDWKDPRWTDIASIRLGIDGDERESRGLVFGKNSIEIEQKSIFQLLTDETTERLRNISKSSCDIRVLRNSFWRHVESSELVPGDVFEVTDPALKQLPCESVPISKSPT…	1053	P5-type ATPase cation transporter	P:GO:0006874; P:GO:0055085; F:GO:0000166; F:GO:0005215; F:GO:0005524; F:GO:0016887; F:GO:0019829; F:GO:0140358; C:GO:0016020	P:intracellular calcium ion homeostasis; P:transmembrane transport; F:nucleotide binding; F:transporter activity; F:ATP binding; F:ATP hydrolysis activity; F:ATPase-coupled monoatomic cation transmembrane transporter activity; F:P-type transmembrane transporter activity; C:membrane	#N/A	#N/A	Cation_ATPase,Cation_ATPase_C,Cation_ATPase_N,E1-E2_ATPase,Hydrolase,P5-ATPase	PR00119 (PRINTS); G3DSA:3.40.1110.10:FF:000057 (FUNFAM); G3DSA:1.20.1110.10:FF:000032 (FUNFAM); G3DSA:3.40.50.1000:FF:000068 (FUNFAM); IPR023299 (G3DSA:3.40.1110.GENE3D); G3DSA:1.20.1110.10 (GENE3D); G3DSA:2.70.150.10 (GENE3D); IPR023214 (G3DSA:3.40.50.GENE3D); PF00122 (PFAM); IPR006544 (NCBIFAM); G3DSA:2.70.150.10 (GENE3D); IPR001757 (NCBIFAM); IPR047819 (PFAM); IPR044492 (SFLD); PIRSR611863-3 (…	P	putative cation-transporting ATPase [Golovinomyces cichoracearum]
aug-contig_10-processed-gene-29.17	MEESLLLDFPNGECAPLPDSTIFSSEAEAFGWAQRQASTGGYAFSNLYKNKSKVTGDIILSCYNCDKGPKTYQNKPTTTSKSKQRDGTGSKKCGCQYKITIKPNESKKWVIIPKKSHNHGRNSSSIAHPAHRIAALQNTLRAEILNAANSGSSISQIMSAFREREGFNLIGKDISNIIQKERQKQLGGMTPLQWLLKELQDNGYNTRFETKDGNILSKLMYLHPQAIQLWKDHPDVLLMDCTYKTNRFNMPILNICGVTGGNKVIQLGLVFLSSEKENDYSWVLQQLKQIMTLEAIRAPLSIVTDRELALMKSLEAHFSDTPHLLCRWHVNMNVLAKSKKYFPKPTKKGNSYVRSPIFVEFLKQWNAVLAATSEETYKQEVAKLEAMAPKDAYIYVERT…	753	#N/A	#N/A	#N/A	#N/A	#N/A	#N/A	IPR018289 (PFAM); IPR052579 (PANTHER)	#N/A	hypothetical protein K3495_g3010 [Podosphaera aphanis]
aug-contig_10-processed-gene-29.7	MAAAARQRLLNEYKGFSKEKWVNIELDKDNIFKWSISLIVVNPESVFDGAYLKAEMGFTDKYPYAPPTFKFLQSIYHPNIYPDGKVCISILHAAGEDEQSGELACERWSSIQSVESVLRSILLLLDDPEITSPANVDASVMYRDDRAAYRERASETVKISQKNIPEGFIMPKTLSDAPPPRIIEDDEFWNESDDQDKFGVSDSSGEDNSDFEIDDKDENA	220	Belongs to the ubiquitin-conjugating enzyme family	#N/A	#N/A	K02207	map04120,map05168	UQ_con	IPR016135 (G3DSA:3.10.110.GENE3D); IPR000608 (PFAM); IPR050113 (PANTHER); IPR000608 (PROSITE_PROFILES); IPR016135 (SUPERFAMILY)	O	Ubiquitin-conjugating enzyme E2-34 kDa [Golovinomyces cichoracearum]
aug-contig_10-processed-gene-3.11	MANHRADEKQFLDERGSSGPLAPNGLNPATIMEKPVRERIVDCYFWKDQCFAVNEADIVNRVVENVNFIGGTYGDSQRPSPFLCLAFKLLQLSPSDEILKEYLHYGGEKFKYLRALALFYIRLTRQPKTVYETLEPFLCDYRKLRKRGRIASSLTYMDVFVDDLLTKDRVCGTTLWKIPKRTVMEDLDLLEPRVSPLGDIEDLLESDKEKDYPQQVDEDNLKNEVENST	229	PRP38 family	#N/A	#N/A	K12849,K12851	map03040	PRP38	IPR005037 (PFAM); IPR005037 (PANTHER)	#N/A	hypothetical protein Golomagni_03691 [Golovinomyces magnicellulatus]
aug-contig_10-processed-gene-31.11	MEESLLLDFPNGECAPLPDSTIFSSEAEAFGWAQRQASTGGYAFSNLYKNKSKVTGDIILSCYNCDKGPKTYQNKPTTTSKSKQRDGTGSKKCGCQYKITIKPNESKKWVIIPKKSHNHGRNSSSIAHPAHRIAALQNTLRAEILNAANSGSSISQIMSAFREREGFNLIGKDISNIIQKERQKQLGGMTPLQWLLKELQDNGYNTRFETKDGNILSKPMYLHPQAIQLWKDHPDVLLMDCTYKTNRFNMPILNICGVTGGNKVIQLGLVFLSSEKENDYSWVLQQLKQIMTLEAIRAPLSIVTDRELALMKSLEAHFSDTPHLLCRWHVNMNVLAKSKKYFPKPTKKGNSYVRSPIFVEFLKQWNAVLAATSEETYKQEVAKLEAMAPKDAYIYVERT…	753	#N/A	#N/A	#N/A	#N/A	#N/A	#N/A	IPR018289 (PFAM); IPR052579 (PANTHER); cd07177 (CDD)	#N/A	hypothetical protein K3495_g3010 [Podosphaera aphanis]
aug-contig_10-processed-gene-31.12	MRLPYNVLGFALIIIPSVLAILADDAYDIDYHYDLLGLPLHDNTFFYRPRKDDKATLLYTLSDLNVIGAINPSTGKLLWRQMLPDRHGNGNGFLRGIRGKGTVVSGMGHKVDFWDSMSGISMCSHEFSGVIRDLEVIETAMGEKSIKYVVVLFEEEGKAVIRSLNADSGDVLWEYRDMNSDIPWQVSGSLNDIFLVSLYGSEEAYNVRVTIVDHMDGKKRSEYSLFSRADVRSSDDLLVIGPNSAAPIVAWTDKAKKNINVNILTRSSAVSDRIPVDQKDGSIEKIKVYAPEIFESQPHFLVYIESEKSSKAKVYHVDIKGGKYKIAYELPKLIGKGAITISYEDSRIYFTQISQNEAITFSSTSDEILGRWPLNTGMYGDFSHAVSEVVRRSESSYAV…	974	Protein of unknown function (DUF1620)	P:GO:0034975; F:GO:0005515; C:GO:0072546	P:protein folding in endoplasmic reticulum; F:protein binding; C:EMC complex	#N/A	#N/A	DUF1620,PQQ_2	IPR015943 (G3DSA:2.130.10.GENE3D); IPR011678 (PFAM); IPR002372 (PFAM); IPR026895 (PANTHER); IPR011047 (SUPERFAMILY)	#N/A	hypothetical protein Golomagni_03696 [Golovinomyces magnicellulatus]
aug-contig_10-processed-gene-31.20	MDERQIELECLASIFPEIQINPRDPLTVRIELPVHSASSIDVRFLATSTRSHSTAPEYKVNSNVETSKLSYFPSLNVCIRLPDGYPLDLPPDVYLTTNPRWLSDTVLDELKIKAQILWEESCGSVVLYAIIDFLQHSAENVFGYGEKRKILEVPEELKISLLDFNVDQIQKAFENKTFNCGICLEPKKGALCHQMLDCNHVFCIKCLQDFYVNAILNGDLISVRCLAPDCVKKSKDNQSEFPKKRRLKTLGPTELLQIPLDQDTVTRYVKLMRKLELESDKNTVYCPRKWCGGAARSCEPSGSDDEESDSHSRTPEERKELLSICEDCSFAFCGRCFQSWHGDFVLCTPRSTRELTEEEKASQEYLKLHTTPCPTCTAPCQKSHGCNHMICSNCNTHFC…	544	RWD	P:GO:0016567; F:GO:0004842; F:GO:0005515; F:GO:0008270	P:protein ubiquitination; F:ubiquitin-protein transferase activity; F:protein binding; F:zinc ion binding	#N/A	#N/A	IBR,RWD	G3DSA:3.30.40.10:FF:000416 (FUNFAM); IPR002867 (PFAM); IPR013083 (G3DSA:3.30.40.GENE3D); IPR054694 (PFAM); G3DSA:1.20.120.1750 (GENE3D); IPR016135 (G3DSA:3.10.110.GENE3D); IPR006575 (PFAM); PIRSR037880-1 (PIRSR); IPR031127 (PANTHER); IPR044066 (PROSITE_PROFILES); IPR001841 (PROSITE_PROFILES); IPR006575 (PROSITE_PROFILES); IPR047548 (CDD); cd23820 (CDD); SSF57850 (SUPERFAMILY); IPR016135 (SUPERFAM…	O	hypothetical protein Golomagni_01288 [Golovinomyces magnicellulatus]
aug-contig_10-processed-gene-32.86	MASKVKSRWEVCDENEVLAADGKKTSEQKKRLKAERLQKAPDATAHLQSRPAKRRKLTPEPEAAVSEEQLTTKILRFPASKWGPCRSVEEFEKLNDIAEGAYGWVSRVRERATGKVVVLKRLKMENTNDGVPVTGLREIQTMRGCNHPNILEIREVVVGADTSKIENIFLVLDFFEHDLKTLLEDMIEPFLKSEIKTLLTQLASGVYYLHNNWILHRDLKTSNLLLNNRGVLKIADFGMARYFGAPPPKMTQLVVTLWYRAPELLLGAENYDTAIDMWSVGCIFGELLTKDPLLQGKNEADQLSKIFELCGTPTEQIWPGFRRLPNARHLRLLQNPISQGSVLRAKFPFLTSSGSSLLIDLLSLDPVKRPSAEEMLNHDFFREDPRPKSTEMFPTFPSK…	447	Serine/Threonine protein kinases, catalytic domain	P:GO:0006468; P:GO:0007346; F:GO:0004672; F:GO:0004674; F:GO:0005524; C:GO:0005634	P:protein phosphorylation; P:regulation of mitotic cell cycle; F:protein kinase activity; F:protein serine/threonine kinase activity; F:ATP binding; C:nucleus	#N/A	#N/A	Pkinase	G3DSA:1.10.510.10:FF:000211 (FUNFAM); G3DSA:3.30.200.20:FF:000054 (FUNFAM); G3DSA:1.10.510.10 (GENE3D); G3DSA:3.30.200.20 (GENE3D); IPR000719 (PFAM); PIRSR500950-50 (PIRSR); PIRSR037921-2 (PIRSR); PIRSR000661-51 (PIRSR); PIRSR600239-51 (PIRSR); PIRSR038189-1 (PIRSR); PIRSR000552-1 (PIRSR); PIRSR000666-1 (PIRSR); PIRSR037014-2 (PIRSR); PIRSR000605-51 (PIRSR); PIRSR037281-1 (PIRSR); PIRSR038172-2 (…	T	hypothetical protein Golomagni_01485 [Golovinomyces magnicellulatus]
aug-contig_10-processed-gene-32.92	MRLCMTSEHGGYYMSSKNGLDQFGSKGDFITSPEISQIFGELIGIWFVAEWMAQGKDTKKGIEIVEAGPGRGTLMDDILRTLKSFGQMSSQIKAIYLIETSPSLRDIQKNLLCGDKPMEKTSIGYRSISKFMNLPIMWTENIRFLPQAQDLCSFIVAHEFFDALPIHAFQSVASTEDIISTPTGEHQPKTQTFGNRRTIGSQWREMVVSPVHKPLHNSPEFQLTLSNTKTPHSLYLPEISPRYRALKGSTGSLIEISPDSHVYAHEFARRIGGTKSEPRSNPSGAAIILDYGPSETIPVNSLRGIREHKFVSPFSSPGLVDLSADVDFVALAEAALAASPGVEVHGPVEQSTFLLNMGIKERAGMLLKNVINDAEKTKRIEGSWKRLVDRGASGMGKVY…	421	Arginine methyltransferase involved in the assembly or stability of mitochondrial NADH ubiquinone oxidoreductase complex (complex I)	P:GO:0032981; F:GO:0035243; C:GO:0005739	P:mitochondrial respiratory chain complex I assembly; F:protein-arginine omega-N symmetric methyltransferase activity; C:mitochondrion	K00231,K18164	map00860,map01100,map01110,map04714	Methyltransf_28	IPR038375 (G3DSA:3.40.50.GENE3D); IPR003788 (PFAM); IPR003788 (PANTHER); IPR029063 (SUPERFAMILY)	H	Protein arginine methyltransferase NDUFAF7, mitochondrial [Golovinomyces cichoracearum]
aug-contig_10-processed-gene-32.93	MNYIHFFCLINLLSFSFVITAWPWPAVISQLDTIWARQDINNNENNNNDNNNNNNNAPDMNGSQSSQQTAKSTENQMQPSSTVESNTGLVTGSPKETNSGDKSESQTMSGSKSYDARLPAGGISMMTPAVSLGQQYFKIGDYVTFGWNYTSLEATPTAVNIMATCSANKELYTIQMNQTVANNTGLVVWDTGRYQATAVQNPLLTQTYTLIIYDSDSSISATAQPGYLAVFNQYTFGMYSPQPYTPLGDFRCATCNDGLSSIQKNALAMACVFHVTEMLA	280	#N/A	#N/A	#N/A	#N/A	#N/A	#N/A	IPR055561 (PFAM); PTHR42028 (PANTHER)	#N/A	hypothetical protein GcM1_222024 [Golovinomyces cichoracearum]
aug-contig_10-processed-gene-33.10	MLFSETSHGVQAVDRFVKLLHDMLNRAQEIKNTDKVDPALHRTDLSENFDEIKSIFPPSVSLETKKQIIDAAARTTFNNLLASMAIEYPSFKSIWNLLDIISILSEDEETEPGLLFWLVEELLDSQTIAGCRKVFDYLESRRETITAKHFQAKKLIILRSCNELLRRLSRAEDTAFCGRVFIFLFQSFPLGDKSAVNLRGEYHTENVTTFDNIPLNQTDPDKMQLDSNSTTTRTTHLQKESEIRKLKHMSEDSANSNFAVSFMKETSIMTADQLYPSFWSLQKYFSQPKKLFDRVKFSTFKHSLEATMVMFRSVQTENSSDRAIKSADDSRRGIKRKRGNGDDELANTFNPKYLTSRDLFELEISDLSFRRHILVQCLIILDFLLSLSAKSKEKLAKAT…	619	THO complex subunit 1 transcription elongation factor	P:GO:0006406; C:GO:0000445	P:mRNA export from nucleus; C:THO complex part of transcription export complex	K12878	map03013,map03040	Guanylate_kin,efThoc1	IPR021861 (PFAM); IPR021861 (PANTHER)	Y	hypothetical protein Golomagni_02903 [Golovinomyces magnicellulatus]
aug-contig_10-processed-gene-33.4	MTEDTQDTKKRKRSSHQKSRARKRVAIEPNPQIKIASHEEEQWVPVIASVSGINVDAQILFKPYLKDRTNSNQGKPSILTHELLLLSSDHPKLNYKAKEEEAGGLNALRKHYVGIYDPATGNLDVLEARNTVLRGIVRTHQHEEEDETISNNIREQRNILGQTFGTKKARKAIASITENAILPATLQRGSNELSKISPATAVVLSNVAKATKDMKSREDLAKDADDVKPRPRAMENATNIEDVYTVESLIGTDILMLVPIKEWQDKAKEHKEIFVSSKFVANRIQKNANDVRKLRILRFMLMLLEIYSKSRQSKEGRRLPKIDDMKEIIGDIPEVVLGAAKRKFVENGIINKYQSDLLITHLCAMSLLVDEFQTDTYDLKEDLQLDLSQITRYFSEIGA…	441	A49-like RNA polymerase I associated factor	P:GO:0006351; F:GO:0003677	P:DNA-templated transcription; F:DNA binding	K03005	map00230,map00240,map01100,map03020	RNA_pol_I_A49	IPR009668 (PFAM); IPR009668 (PANTHER)	K	hypothetical protein Golomagni_02705 [Golovinomyces magnicellulatus]
aug-contig_10-processed-gene-34.81	MASSTPLAPTFYGHIASTQDALMLFEACLTGALGHVPRRPHDRERGNLIKSGNVFIYEEHSSGIKRWTDGVPWSPSRILGNFLVYRELERPFPPGEKKRAMKRSKRSPGIHKPESYSIVNSGYIPTVAVAPPPYESSNSGSISKETERSLIGSLVDSYGFKEDGLVKKTVSVTVGPVSHHLVSYYTVADVMNNKLITPSKDPRFQHIVPRQDLISKQNFRTPIDEIDTIDRVVERSVYSYPYSSRSSYEMTNQAISQQRSLSLPTPPLNYQPNSGGVFANYTIGNQSGSYDSIAPNHSTPSFTNHLAPSTGLYPAPIKNESYDLAGYRQQRYSSVSGISSESSRSHMPSVISTFARRPSNYEQASSIDSGMSSASSDSKLTNDSGYSSQGLLNGIRETT…	464	Gti1/Pac2 family	F:GO:0003677	F:DNA binding	#N/A	#N/A	Gti1_Pac2	IPR018608 (PFAM); IPR018608 (PANTHER)	GT	hypothetical protein Golomagni_00593 [Golovinomyces magnicellulatus]
aug-contig_10-processed-gene-34.93	MKFMRLMKNRSYDVIVIGGGHAGSEACAGSARSGASTALITPKLDNIGVCSCNPSFGGIGKGTLLREIDALDGVAGRIIDKAGVQFKVLNKKKGPAVWGPRAQIDRNLYKKYMREELEAYKNLNIILGCVADIVVSEENGKKRVKGIRLESNEYIAANNIILTTGTFLGGEIHIGLDVHSSGRMGEAATSSLSKFLRNSGFSLGRLKTGTPPRLAKDSITFSAMEEQLGDEPPMPFSYLNESVSVKEQLKCYSTYTNEASHNIVRANLDKSIHIRESVNGPRYCPSLESKIIRFADKLKHMIWLEPEGFESGVIYPNGISMTIPSEAQEQLLKTVPGLENVTMLQPGYGVEYDYVDPRNLKSTLETKLVQGLFLAGQINGTTGYEEAASQGIIAGINAG…	653	GidA associated domain 3	P:GO:0002098; P:GO:0008033; P:GO:0030488; F:GO:0050660	P:tRNA wobble uridine modification; P:tRNA processing; P:tRNA methylation; F:flavin adenine dinucleotide binding	K03495,K12479	map04138,map04144	GIDA,GIDA_assoc	G3DSA:1.10.150.570:FF:000001 (FUNFAM); G3DSA:3.50.50.60:FF:000002 (FUNFAM); G3DSA:3.50.50.60:FF:000145 (FUNFAM); IPR026904 (PFAM); IPR044920 (G3DSA:1.10.150.GENE3D); IPR004416 (NCBIFAM); IPR036188 (G3DSA:3.50.50.GENE3D); IPR040131 (PFAM); IPR049312 (PFAM); IPR002218 (PANTHER); IPR004416 (HAMAP); IPR036188 (SUPERFAMILY)	J	hypothetical protein Golomagni_03549 [Golovinomyces magnicellulatus]
aug-contig_10-processed-gene-35.116	MSLPILEEPEFPPWTLKDASAATGTQVTSYISSRMEAYIEDTMSGSELHALWASDFEFFSEVEYKKSTIQTRALRDFLRSRNVLVLKKGLSIATELVKAS	100	#N/A	#N/A	#N/A	#N/A	#N/A	#N/A	#N/A	#N/A	hypothetical protein GcM3_034027, partial [Golovinomyces cichoracearum]
aug-contig_10-processed-gene-35.123	MSMEFTPRRQQESKQPSVASSKLSKLYPTYESNVHVKDTPHQELQSHIRSPYSNSPRTPRRDNSDSSKRDSSKFEYGSMPKPRNKTRPKNVMTSPATNKKIQNVSPRDSTQSAGIPSSSLRTPTATTAYAGPTFHSSPAPSTLPIPRFYSESMPGSPNFNTRRSSKESHTSPKSPKAIQLVDRSSDDDSPLDYIFKMDRERKKTTKNTPTYRTGPVSAPFCYQATSPCSNRDFSYITDINNSCTKRPSKNSSIAKLLIEAVKECDSSIPYDAPFSTPYSERINAIRPFDNSKPKSELQSTKNQSRSDITEALKAYLFSGHLNSTNSSISSDTSESC	336	Proline-rich nuclear receptor coactivator motif	#N/A	#N/A	#N/A	#N/A	#N/A	IPR028322 (PFAM)	#N/A	hypothetical protein Golomagni_01961 [Golovinomyces magnicellulatus]
aug-contig_10-processed-gene-35.125	MNDQIRVKLCRKKEDNKNLTQNELIAWANETYKLKVSQGTVSNTLKRSQELLRGAESAHGSNPNAKRHKAVTYPLMEEALNNWFLTRQEMVNMSGDLLKFKDAAADIHINGKVQTTLDTYFRT	123	DNA binding	#N/A	#N/A	#N/A	#N/A	DDE_1,HTH_Tnp_Tc5	IPR041188 (PFAM); G3DSA:1.10.10.60 (GENE3D)	BD	hypothetical protein K3495_g2199 [Podosphaera aphanis]
aug-contig_10-processed-gene-36.250	MLIEEFREPRYGEYYIYFSNIVKKSSLERLAEADDHEVVRVVHEYFADFTVINPDLFTLELGLPSRIWSSDSDIWHTDTLKRTTEGLLALLLSLKKKPLIRYDKSSLMAKKLGMEVQYFINQENQLFDLRIVDTPPILLILDRRDDPVTPLLTQWTYQAMLHELIGIHNGRVDLSDVPDIRPELKQVVLSQDQDAFFKKNMFLNYGDLGGNIKDYVEQYQSKTKNSSNIESIADMKRFIEEYPEFRKLSGNVSKHVTLVGELNRKVSSESLLEVSEVEQSLACNDNHAADLKNVQRLIQLSSVTSDAKIRLVALYALRYEKSPANSLAALVDLLLAVGNVPRNKIDIIPKILTYQSSLQQAQTSTGSISNILESTGIFSGARDRLKGLQGVENVYTQHS…	506	Belongs to the STXBP unc-18 SEC1 family	P:GO:0016192	P:vesicle-mediated transport	K12479,K20367	map04138,map04144	Sec1	G3DSA:3.90.830.10:FF:000002 (FUNFAM); IPR027482 (G3DSA:3.40.50.GENE3D); G3DSA:1.25.40.60 (GENE3D); IPR001619 (PFAM); IPR043127 (G3DSA:3.90.830.GENE3D); IPR043154 (G3DSA:3.40.50.GENE3D); IPR001619 (PIRSF); IPR001619 (PANTHER); IPR036045 (SUPERFAMILY)	U	Vacuolar protein sorting-associated protein 45 [Golovinomyces cichoracearum]
aug-contig_10-processed-gene-36.254	MPSQRDRDPTKIHQSKSHRKPLHQRSDSESNLNKRADVRLVPKTPPRLLDINDNDDAYFYSQTPLPTLPSNILISRKQAVKNSASDHNISEFQDSSSRISPLSSPCGLKTISTPINGARAISKSRHRNNALLISTGSPSSRPSIKTRQLRIHEDSKTFSLCSPKDDKQSSLGEVASQEENVMSTGSYPLYSSPRVSEQITSTLGAGTIKYDQGTKTPELSNSSCTLQSRENSVSKTTSSSDKFKKQITENSKNSFSCNYEFVGGLRKVAETPNHILPSPASLKNLTSLQLPVEVSSSTVPQDLSSKPSFSSSDSTSSETTNYKIYGTLSPSNSSHSLVSPSPLPVSRNSLTLENSVPITDPEINQLVSHRDIESHKVSKDFPQLSNVLTEQRISTSHSL…	861	serine-rich protein	#N/A	#N/A	#N/A	#N/A	#N/A	#N/A	#N/A	putative serine-rich protein [Golovinomyces cichoracearum]
aug-contig_10-processed-gene-36.274	MIDLKTVAFYLRKVRDGLVISGEKASSSAMEEVDKTLVALKSHETALQIKTKATPMEERMLALEKAVKKSLEGPACNMAPSTVPRSGGRPTYASIVTPPATKAAVRIRVEGAELMQPAELLKKAKQHIVGAYAVRKLRSSDTEVFVQSVSQRDTALSSVQQKEFQILRPDYPVEIVGVPLGTMIERGKTANNGGIIYKMMKETKFRIPDIKINRVRWLYDGKEHQWSRKNGRTQVLVIVSLPTEVLQRKVIRNGIALNAILYTAQLWSPRAQVQQCFNCNQWGYTQASCKKAKRCGECAGAHQTRDCPKTAVSCYNCGKAHRSWQRRSCPNFTAYKSSVQRAKFEFLERTAEIRRNAEAGISGELIKSVAATKRDDQGFTLVSNHRAEGSKRGPGRPRK…	447	Encoded by	#N/A	#N/A	#N/A	#N/A	#N/A	#N/A	#N/A	hypothetical protein K3495_g991 [Podosphaera aphanis]
aug-contig_10-processed-gene-36.276	MLEPGPSQPTAEKRHEEYQYLDLISEILESGEHRPDRTGTGTLSLFAPKPLKFRLSESGKPILPLITTRRIFLRAVITELLWFISGSTSSIPLAEAGIKIWDGNGTREYLDSVGLSHRDVGDLGPIYGFQWRHFGADYINANTDYTGKGVDQLAEVVSKLKTNPYDRRIILTAWNPRDLKLMALPPCHLLAQFYVSFPQGIKSVGTLHCLLYQRSCDMGLGVPFNIASYALLTHMLAHTCELLPGTLTHTMGDAHVYTDHIEALKTQVIREPRPFPEIEIKKEKGGSIDDWLVDDFLIKGYEPHKSISMKMSVMSF	316	Thymidylate synthase	P:GO:0006231; F:GO:0004799; F:GO:0016741; C:GO:0005739; C:GO:0005829	P:dTMP biosynthetic process; F:thymidylate synthase activity; F:transferase activity, transferring one-carbon groups; C:mitochondrion; C:cytosol	K00560	map00240,map00670,map01100,map01523	Thymidylat_synt	IPR000398 (PRINTS); G3DSA:3.30.572.10:FF:000013 (FUNFAM); IPR000398 (NCBIFAM); IPR023451 (PFAM); IPR036926 (G3DSA:3.30.572.GENE3D); PIRSR000389-1 (PIRSR); IPR045097 (PANTHER); IPR000398 (HAMAP); IPR023451 (CDD); IPR036926 (SUPERFAMILY)	F	Thymidylate synthase [Golovinomyces cichoracearum]
aug-contig_10-processed-gene-4.21	MSTYANPLLVQWVGEWLEEARSRNSKGIQVYKKAYESLRANPIPFSHPSEAKQLTGFGDKLCARLTAKMEKFCQENNLPPPKQVSRSSQNKRDIAASSDASDEGEIEIRESQPKKSRKSKTYVPQYRSGGYGLILALATLCKDPPAYMTKQDAISLAQPHCDSSYTAPCDPTKLYTAWNSMKILTDKNLVHEKKGGTRKYSLTSAGWDCARSIQNYIDPSQIPANSLAHTSGKSIVEHHAQTSASASQPIMESLPKNQIPSLIPNGKETISASNIPHFTPIILEPGSFSIEMVLDTREVRTIRDRDYVEKELINRGIKPLKRVMALGDVTWVAKVHDPTRLSNQSIDGGEIILDYIVERKRLDDLIASIKDKRFHEQKFRLGRSGVKNVIYLIEEISMS…	587	ERCC4 domain	P:GO:0000712; P:GO:0000727; P:GO:0006302; P:GO:0006308; P:GO:0031573; F:GO:0003677; F:GO:0004518; F:GO:0008821; F:GO:0048257; C:GO:0005634; C:GO:0048476	P:resolution of meiotic recombination intermediates; P:double-strand break repair via break-induced replication; P:double-strand break repair; P:DNA catabolic process; P:mitotic intra-S DNA damage checkpoint signaling; F:DNA binding; F:nuclease activity; F:crossover junction DNA endonuclease activity; F:3'-flap endonuclease activity; C:nucleus; C:Holliday junction resolvase complex	K08991	map03440,map03460	ERCC4	G3DSA:3.40.50.10130:FF:000003 (FUNFAM); G3DSA:1.10.150.110:FF:000001 (FUNFAM); G3DSA:1.10.10.10:FF:000307 (FUNFAM); IPR027421 (G3DSA:1.10.150.GENE3D); IPR047417 (PFAM); G3DSA:3.40.50.10130 (GENE3D); IPR036388 (G3DSA:1.10.10.GENE3D); IPR042530 (G3DSA:1.10.150.GENE3D); IPR006166 (PFAM); IPR033309 (PANTHER); IPR047417 (CDD); IPR047416 (CDD); IPR011335 (SUPERFAMILY); IPR027421 (SUPERFAMILY)	L	Crossover junction endonuclease MUS81 [Golovinomyces cichoracearum]
aug-contig_10-processed-gene-4.22	MAIRRDLDVREQRRNQPCQNRSNEYFVPKDGIDREVITADICRYLGNDALVRPGNYENPSTNTVQPGYYITAYRNLTSAMIEDLKADSQRWDQERRAANSRENVGYTQSRTHESRQQWGPSGESNKNYSSSINSQASFDQFPQSIYPHPPSAAYNQQLPPSSYMQQENYYVAGSNMAVEQPRGYHSPTGVEVPRVSAPHYVQVPPNQQYTNQAPSQSYSRGSYGQLPPPINNSRLRREDSNFAPQILTAPPSYQEEKKAHFVQPPNAATYGNSFNTRDTFNDRNFPDPGRFNHNSPPSVGLPPLSQTRRDNDRENDSRDSRKYRDLGRRH	330	transcription factor RfeG	#N/A	#N/A	#N/A	#N/A	#N/A	PTHR39609 (PANTHER)	#N/A	putative transcription factor [Golovinomyces cichoracearum]
aug-contig_10-processed-gene-5.107	MAEFKLSVSLLGHEDDVRGVSYPTSKVIVSASRDKTTRLWKRDSDEYSTYETKIVSFSGHWLNAVTYLPPNKEYPKGLLFAGGKDLVIEVREPTNAPEANAEALLLGHNNAICSLDLDPEGKFVVSGAWDNQARIWSVGRWECESILEEHEGSVWAVLAYDSETIITGCADQKIRIYHISGKCLKSFQASKSPVRALCRLSSLHQSGGEFASADNEGVIRFWSLIGEQMGEAIGHESFIYSLASLPTGEIVSSGEDRTLRVWKGTQCIQTITHPAVSVWSVAVCAENGDIVSGASDNIIRVFTRSKERIASKEVLKSFEDSVKNSSIPMQDIQKEKLPGPDFLKSKSGTKDGQVQMIRENNGSVTAHTWSEATLSWNFVGTVVDSVGSNGQKEVYNDKE…	781	PFU (PLAA family ubiquitin binding)	P:GO:0010992; P:GO:0043161; F:GO:0005515; F:GO:0043130; C:GO:0005634; C:GO:0005737	P:ubiquitin recycling; P:proteasome-mediated ubiquitin-dependent protein catabolic process; F:protein binding; F:ubiquitin binding; C:nucleus; C:cytoplasm	K14018	map04141	PFU,PUL,WD40	G3DSA:2.130.10.10:FF:000236 (FUNFAM); IPR015943 (G3DSA:2.130.10.GENE3D); IPR038122 (G3DSA:3.10.20.GENE3D); IPR001680 (PFAM); IPR011989 (G3DSA:1.25.10.GENE3D); IPR015155 (PFAM); IPR013535 (PFAM); PTHR19849 (PANTHER); IPR001680 (PROSITE_PROFILES); IPR001680 (PROSITE_PROFILES); PS50294 (PROSITE_PROFILES); IPR013535 (PROSITE_PROFILES); PS50294 (PROSITE_PROFILES); IPR001680 (PROSITE_PROFILES); IPR0151…	I	hypothetical protein Golomagni_04508 [Golovinomyces magnicellulatus]
aug-contig_10-processed-gene-5.111	MSNRYSFEHRKPKYQGTCSIDSYVTVDFLQNSQNHEAITSHDTPYYSSQQHSEPSPMLPLSASPEIAHPETSRQPPLTHSSKIQEAVQYHDLQRQSPSLALQDHNAPDRLWDHNVKKEKKKNYSACTFSTKSNAEDIREKFFGQEANHLHGTANENYNHCEREVLREIQGHTTKMDLPSDDRFNYSPYRRSEVYSEPSHSSQAYFSNSTSALGHLTPPSWSTVSSTLHSQNREQYSEVPYRYSRNVDSDICDFDPRSIEDDGDDGLEYKQRQRLPVINFCHSERNSLHAPTAISTYKGSIPGSSEGVPGKKSNNSLTDSPKINSLSTKNGRYAVDGIPKAGGLTEPEKSEWLSKQSSARSKLRLLVLLIVTLVILGGITGGIVSGILHKKSSSSPSDSS…	725	Belongs to the glycosyl hydrolase 17 family	P:GO:0005975; P:GO:0071555; F:GO:0004553; F:GO:0042973; C:GO:0005576; C:GO:0009277; C:GO:0009986	P:carbohydrate metabolic process; P:cell wall organization; F:hydrolase activity, hydrolyzing O-glycosyl compounds; F:glucan endo-1,3-beta-D-glucosidase activity; C:extracellular region; C:fungal-type cell wall; C:cell surface	K01210	map00500	Glyco_hydro_17	G3DSA:3.20.20.80:FF:000151 (FUNFAM); G3DSA:3.20.20.80 (GENE3D); IPR000490 (PFAM); IPR050732 (PANTHER); IPR017853 (SUPERFAMILY)	I	putative glucan endo-1,3-beta-glucosidase btgC [Golovinomyces cichoracearum]
aug-contig_10-processed-gene-7.71	MSAISNYDNGHMYMPGNSSQKIHRPILPAPNPASFAVKSPEFNSSKSPFRTAGNEQKCRQKKRSDSKKKRDLAFWRRVYESGLLSEDNKQLVYLKIITGLSWKETQRRFNEGKPFQMQQAALQMRLNRLAEKMDVSSPNSTGFFFTSKVKAEVDKMTQSLWAQEQEPNPQTSGPSNFPVLSSTLIQPTSWPMESVNPRDNFGYCKSTLTTNFPLHMENSWSGIDRNYAYTNSITSPTIMVSNTLGYNYCPDQFFDQSNSYSADVLQFIPWKIDS	274	#N/A	#N/A	#N/A	#N/A	#N/A	#N/A	#N/A	#N/A	hypothetical protein Golomagni_02975 [Golovinomyces magnicellulatus]
aug-contig_10-processed-gene-8.16	MIDQIRVKLCRKKEDNKNLTQNELIAWLNETYKLKLNQGTVSNNLKRSQELLRGAETAHGSNPNAKRHKAVTYPLMEEALNNWFLTRQEMVNMSGDLLKLKDAAADIHINGKVQTTLDT	119	DNA binding	#N/A	#N/A	#N/A	#N/A	DDE_1,HTH_Tnp_Tc5	G3DSA:1.10.10.60 (GENE3D); IPR041188 (PFAM)	BD	hypothetical protein K3495_g2199 [Podosphaera aphanis]
aug-contig_10-processed-gene-9.10	MTTILTSNMTNTKPEFRDNFFRQGYSFHQQLPQHDPLPLGGSYQNPELNFSFLNKQTRGNCELSKISSYNPQISLTESGTISNLRPFKPTSSLKRSSSHVDFSPYDDCSQNTKEELSINQKPKISQDHQLLSFAKIPETHTLIDDQDCVQRIDLTAQLHGMFFLSELGSTPDKITAAKPELTCYRRNLFQISGSVTMPHGSLSYMAERGEKIPLVSMEVKISATESIDGHTVKLIVIPWKTPPPNSPEIDLSHEHEPTTIPLTAYNSNLDIEHGTICSPIAYRRLQFRIATANNGRRRELQQHFSLHLTVVGALADGSRISVCETSTAPIVVRGRSPRNFQARKGIPLLGSSSSRGNPPELQKAMNLMARNALVENKTKNLTNQKIEQSLELSGVETSI…	572	NDT80 / PhoG like DNA-binding family	P:GO:0006355; P:GO:0045944; P:GO:0051321; F:GO:0003677; F:GO:0003700; C:GO:0000228	P:regulation of DNA-templated transcription; P:positive regulation of transcription by RNA polymerase II; P:meiotic cell cycle; F:DNA binding; F:DNA-binding transcription factor activity; C:nuclear chromosome	#N/A	#N/A	NDT80_PhoG	IPR024061 (PFAM); IPR037141 (G3DSA:2.60.40.GENE3D); IPR052605 (PANTHER); IPR024061 (PROSITE_PROFILES); IPR008967 (SUPERFAMILY)	E	putative ndt80 like dna-binding family protein [Golovinomyces cichoracearum]
aug-contig_10-processed-gene-9.18	MSEKELAEKLAKISIGEVKEERKQSKMASGMVPVEEFNRLRRQMDDVLRKMAAQDDKNKNGSNSRVRIEKDPPPENAFGLKPTSLPEFDGNRNHYPAWRTAVLDIFRMDWNLFGYDDSRAFIMIYRAMKGVAITKVDPLRVARANDELHSLRMGERQRWPDFYATWSNKLTEARGDFWDDANKISMLRNSLNDRLITTLAGNHLLPEDNFNEWVRIVGHVAQQLEVVDGRNRRLKQSPQLRSSFSSDSEKISSESSDVIRSQNIDGLTRSGAEVGRAGQLDSSGDMFMGGVNTADMDRGQNRGRAKWKTRVQLEQLKREGKCFRCERQGCITKRCPLLPARRPIGRDLKVNMAALPEIDPSIIEYDSSTEPSVALVDNGCLCSGIINESLLSRLDLPRI…	1602	Integrase core domain	P:GO:0015074; F:GO:0003676	P:DNA integration; F:nucleic acid binding	#N/A	#N/A	Chromo,Peptidase_A2E,RVT_1,rve	G3DSA:3.30.70.270:FF:000063 (FUNFAM); IPR021109 (G3DSA:2.40.70.GENE3D); IPR041373 (PFAM); IPR000477 (PFAM); G3DSA:2.40.50.40 (GENE3D); IPR043128 (G3DSA:3.30.70.GENE3D); IPR001584 (PFAM); IPR036397 (G3DSA:3.30.420.GENE3D); G3DSA:1.10.340.70 (GENE3D); IPR043128 (G3DSA:3.30.70.GENE3D); G3DSA:3.10.10.10 (GENE3D); IPR041588 (PFAM); IPR050951 (PANTHER); IPR001584 (PROSITE_PROFILES); IPR000477 (PROSITE_…	L	hypothetical protein K3495_g13520, partial [Podosphaera aphanis]
aug-contig_110-processed-gene-0.113	MASRKVLMLGAGFVTRPTLDILCEAGVNVSVACRNIETAKGLTQGVKNATPISLDVTNEQQLDAEVAKNDLVISLIPYTFHATVIRSAIRNKKNVVTTSYISPAMLELNDEAKKAGITVMNEIGLDPGLDHLYAVKTIEEVHDAGGKINSFLSYCGGLPSPENSDNPLGYKFSWSSRGVLLALRNAAKYYKDGKIVEVAGKDLMGTAKPYHIYPGFAFVAYPNRDSTSYKQRYNIPEAQTIIRGTLRYQGFPEFIRVLVNIGFLSDESQTYLLEPISWKEATKNILSASSSGVQDLKLAISSKSKFESTEEKDRIINGLSWIGIFSDEKIIPRGNPLDTLCATLEKKMQYEEGERDMVMLQHKFEIEHKDGSKETRTSTLVEYGDPKGYSAMAKLVGVP…	447	Saccharopine dehydrogenase C-terminal domain	P:GO:0019878; F:GO:0004753; C:GO:0005737	P:lysine biosynthetic process via aminoadipic acid; F:saccharopine dehydrogenase activity; C:cytoplasm	K00293,K00797	map00270,map00300,map00310,map00330,map00410,map00480,map01100,map01110,map01130,map01230	Sacchrp_dh_C,Sacchrp_dh_NADP,Spermine_synt_N,Spermine_synth	G3DSA:3.30.360.10:FF:000008 (FUNFAM); G3DSA:3.40.50.720:FF:000072 (FUNFAM); G3DSA:1.10.1870.10:FF:000002 (FUNFAM); G3DSA:3.40.50.720 (GENE3D); G3DSA:3.30.360.10 (GENE3D); IPR005097 (PFAM); G3DSA:1.10.1870.10 (GENE3D); IPR032095 (PFAM); IPR051168 (PANTHER); IPR036291 (SUPERFAMILY); SSF55347 (SUPERFAMILY)	E	hypothetical protein Golomagni_04321 [Golovinomyces magnicellulatus]
aug-contig_110-processed-gene-10.19	MTSAETAECLKTSLTHGLSPAEAITRLHDQGPNELPHEGPEPLWLRFLKQFKEPLIILLLCSAGASVLVGNRDDALSIAVAVTIVITVGFIQEYRSEKSIEALNHLVPNHVNLIREGETRKPSTQSSSIRPPTTKKDTTREALQDLGIDSEFTTTIEVTSSRALASQLVPGDLVLFSTGDRIPADIRVTKAIDLTIDESNLTGENEPAKVTAESKSPRSASISSHANTLQPQSSSLSINSRMDTNADAQSNELTNIALMGTLVRSGHGQGIVYATGGDTRFGQIAAAVTETESPRTPLQLSMDSLGSHLSQISSGIIAIISLIGWLQGKGLLELFTVSISLAVAAIPEGLPIIVTVTLALGVHRMAKHNAIVRKMPSVETLGSVNVVCSDKTGTLTMNH…	1315	Belongs to the cation transport ATPase (P-type) (TC 3.A.3) family	P:GO:0006779; F:GO:0000166; F:GO:0004853; F:GO:0005215; F:GO:0005524; F:GO:0016887; C:GO:0016020	P:porphyrin-containing compound biosynthetic process; F:nucleotide binding; F:uroporphyrinogen decarboxylase activity; F:transporter activity; F:ATP binding; F:ATP hydrolysis activity; C:membrane	#N/A	#N/A	Cation_ATPase_C,Cation_ATPase_N,E1-E2_ATPase,Hydrolase,Hydrolase_3	PR00119 (PRINTS); G3DSA:3.40.50.1000:FF:000028 (FUNFAM); G3DSA:3.20.20.210:FF:000008 (FUNFAM); G3DSA:3.40.1110.10:FF:000040 (FUNFAM); IPR023299 (G3DSA:3.40.1110.GENE3D); IPR038071 (G3DSA:3.20.20.GENE3D); IPR006361 (NCBIFAM); G3DSA:1.20.1110.10 (GENE3D); PF00702 (PFAM); IPR004014 (PFAM); PF00122 (PFAM); G3DSA:2.70.150.10 (GENE3D); G3DSA:1.20.1110.10 (GENE3D); IPR023214 (G3DSA:3.40.50.GENE3D); IPR0…	P	Calcium-transporting ATPase 1 [Golovinomyces cichoracearum]
aug-contig_110-processed-gene-10.25	MGKYGGTVLTGQDNFTLWQTNLEIELAAVRLKKFLRHDKCITPTRQNLKNTRSNDDDNFENELEEWEFQHAQALKIILQSVDNTNRVIIQSCQTASLAYETLVKRYNMKNTARLAQLLSQLFLIQFMKEVDVVEKYDLIINLCSQITDQQPDASISEIVQAVILMRSLPSEFDTTLEILTNKNTFPTLEDVFQAAKSTETRLADPEISTELQIANSVSKPLRNRLKVCWVCQGNHVKSSCPKWLATQEGSDFKKSGLKWHQWRVSKNNSQGANAVNLKNEVVDCNPVSSFDNDSEFEKSTYLCAAANSDPKLNWGLDTMCSCHLTPRKDAFVGKIMPTRVAIEVADGTTIYSEGKGDVRIFWKSSTSSHLLRSTILRGVLYVPDASISLISLGALVEKG…	1399	transposition, RNA-mediated	P:GO:0015074; F:GO:0003676	P:DNA integration; F:nucleic acid binding	#N/A	#N/A	#N/A	IPR013103 (PFAM); PF14223 (PFAM); IPR036397 (G3DSA:3.30.420.GENE3D); IPR054722 (PFAM); IPR039537 (PANTHER); IPR001584 (PROSITE_PROFILES); cd09272 (CDD); IPR012337 (SUPERFAMILY); IPR043502 (SUPERFAMILY)	#N/A	hypothetical protein K3495_g7973 [Podosphaera aphanis]
aug-contig_110-processed-gene-10.26	MFYSETLLSKTGPLARVWLSANIERKLSKNHVLQTNVKDSVDAIVMPNQAPLALRLSGQLLLGVVRIYRRKANYLLDDCNEALIKIKMAFRTSTNNDLVDGFCIPSRDALMLPDVLTEGDDLEMPLLPEAPFLLSQTDDESNTRKKRAGSRDINLQEDFASQFMHSSVENNEEILEPMDELDLGLDLGFDPEVNPLNDLSLEMGRDAPAARDVEDDLISKLDNQIPSKDASFEMIGQDTSLNLEFGGDNSQMPDDDGIRIRNEDEDTEMFLGDNQDITLQSTQLIQSRRISESPLSDIGEMAGTISQPSAEHKTLDAIPMETEENEKKNESIDQERESDKNQGHENEEDQDPGQEQEQMQDLELEQENERIIRKPAQRAKRNRHLQPDPTIELSSAQIK…	670	Conserved region of Rad21 / Rec8 like protein	P:GO:0007062; P:GO:0007064; P:GO:1990414; F:GO:0003682; F:GO:0005515; C:GO:0008278; C:GO:0030892	P:sister chromatid cohesion; P:mitotic sister chromatid cohesion; P:replication-born double-strand break repair via sister chromatid exchange; F:chromatin binding; F:protein binding; C:cohesin complex; C:mitotic cohesin complex	K06670	map04110,map04111	Rad21_Rec8,Rad21_Rec8_N	G3DSA:1.10.10.580:FF:000004 (FUNFAM); IPR006910 (PFAM); IPR006909 (PFAM); IPR023093 (G3DSA:1.10.10.GENE3D); IPR039781 (PANTHER); IPR036390 (SUPERFAMILY)	D	putative double-strand-break repair protein rad21 [Golovinomyces cichoracearum]
aug-contig_110-processed-gene-11.17	MSSTVLPAKSESPSNFSCPTNNRPTARVIQPLHKIGENLSSVSRSVQTSGAAKKKRKNHRGKKTNRPRKPSFTSKDGVDVTNRPENPPSRPDASPQSSLREILYKVHARTRRSIDNEAQLDRREQTTFRRRRSNAMGQSAFGVPLYGSSTSYRLQQSYNKTFDRGNEGITAEDDERSPLIKPWSTSSVGYGVYGLELPLPGRRRDSNRRHSSRSSGTSNPNIAFEKSSPTFSSHFDGYNVNDPPSIPGSPRLETSHVIGFRDVLAMDDFRSTGISPRDVAGSISEHIRCDKPRVESPQSGVRHVHERSNSLQHEDDIHFPEEEYIQEKVKQSFTCGHGPRRRRGKWPDLAMLDEWSKFEKEGASNERRAKKITEPQLIGGRLRPIHKGWHRAEDDAPYR…	862	CorA-like Mg2+ transporter protein	P:GO:0010961; P:GO:0030001; P:GO:0055085; P:GO:1903830; F:GO:0015095; F:GO:0046873; C:GO:0000329; C:GO:0016020	P:intracellular magnesium ion homeostasis; P:metal ion transport; P:transmembrane transport; P:magnesium ion transmembrane transport; F:magnesium ion transmembrane transporter activity; F:metal ion transmembrane transporter activity; C:fungal-type vacuole membrane; C:membrane	#N/A	#N/A	CorA	G3DSA:1.20.58.340:FF:000008 (FUNFAM); G3DSA:1.20.58.340:FF:000014 (FUNFAM); G3DSA:3.30.460.20 (GENE3D); IPR002523 (PFAM); G3DSA:1.20.58.340 (GENE3D); G3DSA:1.20.58.340 (GENE3D); PTHR21535 (PANTHER); IPR044089 (CDD); IPR045861 (SUPERFAMILY); IPR045863 (SUPERFAMILY)	P	hypothetical protein Golomagni_03741 [Golovinomyces magnicellulatus]
aug-contig_110-processed-gene-11.22	MPMIHAVGVSTTYQSFTSFICFTKSETTDDYNSALETSQFLFGGLNLEVIMTDNDLALMNAIRAKHRGSFARKEEWDVWENSWKTVIRQATCEGFNEAWSTLKSVSPPDLVSNVERQWIPHKERFATPWTNNYRHLGHSTSSRAEGAHAKVKAYLGVSTSQLFTVFKRLKDSYQSDITKISARIGQQQQKIGRRARGRIFEKLKSKIPHKALHMIADLIDVINKEENQHVACTGIFQRVWGMPCRHQIKSYLNLNRHLDVSEFCSHWFLSNYSSTTALDSINIMEDKEPISTILAQLNDSISTWDTHQQFAACSQLKQIRDIGITGGYAVMSTGIQEPLIIRLKGRPPGALNKRNTVGVVGRKGLAAESLTQRELSEFEHVARNAGDIIRLTKRQSGPR…	433	protein FAR1-RELATED SEQUENCE	#N/A	#N/A	#N/A	#N/A	#N/A	IPR052579 (PANTHER)	#N/A	hypothetical protein GcC1_011032, partial [Golovinomyces cichoracearum]
aug-contig_110-processed-gene-11.23	MASFQLLEPREEEELHKIRLLNVEEKPFKRVSKRLLAPYSFLTNPSKLPTPPPDSVQRESASLESIQQKVNEERCQFKNDILLDFSAFDSSLIRIQFLRNSNEQERERYRADKARILATAQSVRDSNAQLRIHLDEAKRTLEQRQKFDELAEKITGSRLLRPREDQLANLRKLEEECRELERESKNYKIIWAERREQFGRIVDEGMQLRRLIRDEKEEVERREGMAEEEDGENVDGSSSHDGQTPKHIHGNGTPKHQNGQSDTPDRGGRPESRSASKSVNHTSPTATERRKREYFSQRDDSIMGDINRAAPTMNEPGAFESDASSINKGKTEVEDKMDTS	340	Tho complex subunit 7	P:GO:0006397; P:GO:0006406; C:GO:0000445	P:mRNA processing; P:mRNA export from nucleus; C:THO complex part of transcription export complex	K13176	map03013	THOC7	IPR008501 (PFAM); PTHR23405 (PANTHER)	#N/A	hypothetical protein Golomagni_03435 [Golovinomyces magnicellulatus]
aug-contig_110-processed-gene-13.27	MEESLLLDFPNGECAPLPDSTIFSSEAEAFGWAQRQASTGGYAFSNLYKNKSKVTGDIILSCYNCDKGPKTYQNKPTTTSKSKQRDGTGSKKCGCQYKITIKPNESKKWVIIPKKSHNHGRNSSSIAHPAHRIAALQNTLRAEILNAANSGSSISQIMSAFREREGFNLIGKDISNIIQKERQKQLGGMTPLQWLLKELQDNGYNTRFETKDGNILSKLMYLHPQAIQLWKDHPDVLLMDCTYKTNRFNMPILNICGVTGGNKVIQLGLVFLSSEKENDYSWVLQQLKQIMTLEAIRAPLSIVTDRELALMKSLEAHFSDTPHLLCRWHVNMNVLAKSKKYFPKPTKKGNSYVRSPIFVEFLKQWNAVLAATSEETYKQEVAKLEAMAPKDAYIYVERT…	753	#N/A	#N/A	#N/A	#N/A	#N/A	#N/A	IPR018289 (PFAM); IPR052579 (PANTHER); cd07177 (CDD)	#N/A	hypothetical protein K3495_g3010 [Podosphaera aphanis]
aug-contig_110-processed-gene-14.0	MEESLLLDFPNGECAPLPDSTIFSSEAEAFGWAQRQASTGGYAFSNLYKNKSKVTGDIILSCYNCDKGPKTYQNKPTTTSKSKQRDGTGSKKCGCQYKITIKPNESKKWVIIPKKSHNHGRNSSSIAHPAHRIAALQNTLRAEILNAANSGSSISQIMSAFREREGFNLIGKDISNIIQKERQKQLGGMTPLQWLLKELQDNGYNTRFETKDGNILSKLMYLHPQAIQLWKDHPDVLLMDCTYKTNRFNMPILNICGVTGGNKVIQLGLVFLSSEKENDYSWVLQQLKQIMTLEAIRAPLSIVTDRELALMKSLEAHFSDTPHLLCRWHVNMNVLAKSKKYFPKPTKKGNSYVRSPIFVEFLKQWNAVLAATSEETYKQEVAKLEAMAPKDAYIYVERT…	724	#N/A	#N/A	#N/A	#N/A	#N/A	#N/A	IPR018289 (PFAM); IPR052579 (PANTHER); cd07177 (CDD)	#N/A	hypothetical protein K3495_g3010 [Podosphaera aphanis]
aug-contig_110-processed-gene-14.10	MSQSFSNKPTPSRAYNGLPEDFCVFEDAVNEDWNSGAFDSNNVKSLNGYTIYITISYQRSEMYDEALYQAFAEDFVDWDEKMFDNVRKELLRLLRTTLRQRGCFVASDRNKLSRNLHIASEAEWHEWTDSEITQQQDKQGGFLPRSCYSINRRIKEETPVPLLSTTSVLNPSAATITHHHIDQTPRQITDLIKIYNDNSKKYGGERYDFLNKKLEIFYDLCGKIGLQPVNYSKAFSVMLSGKALEYYYQNIVGRELTMKEIVHEVEQHFETSEVRRFYLNEWRTVTLQSIIDSNPGKPKLKCFELMLEKLNQIQPGLSVSYRNDTVLRDQILVACQGIPECSYSLYKPSETLEGVCADMRNAISTRINEIKYQSLRSGTDEQYWTDRTYSNNKPKYVVG…	1583	Reverse transcriptase (RNA-dependent DNA polymerase)	P:GO:0015074; F:GO:0003676	P:DNA integration; F:nucleic acid binding	#N/A	#N/A	RVT_2,rve	IPR036397 (G3DSA:3.30.420.GENE3D); IPR013103 (PFAM); IPR001584 (PROSITE_PROFILES); IPR012337 (SUPERFAMILY)	L	hypothetical protein K3495_g12155, partial [Podosphaera aphanis]
aug-contig_110-processed-gene-15.0	MGSYTDSRVILRDGISFANWRADLQAKLSQSDVLGHVFHDIRGIDPEIEPEQPTLIKGEDPEKYNARMIEYKNKLRAWIRGEFEAQNIIIQRLDDNKKPQGYHRYTAKQLYDMIAKANEVANLLPHSEAFDKFIATRFTTTADEYCTRFMRNLQNVNNAADSLSSGSATANTYKFSDELAAVYFVKGTRHVKWLNIWRETKAVNISQYAPLNHMITTLRAAAGTRDLTGEQDSDINNFSTSNPVAAAAKSKQRVKRNRCKQCRKFHNSKECTKQTESDIGQDSDDPCTLCRHNHANKDCYKQHPERAPESWYKGEAGKGHYHGKAAISISRNFDTSDEDDRFYI	344	#N/A	#N/A	#N/A	#N/A	#N/A	#N/A	#N/A	#N/A	hypothetical protein K3495_g15482 [Podosphaera aphanis]
aug-contig_110-processed-gene-15.7	MSCTSSSSPLPDESGEPRKKGARGGKRSVTHLSKAQLARKRANDREAQRNIRKRTKEHIGNLERKVKELEQSGRSSSMERILKRNQDLEAEIERLRAQFTSLGQIPHFTQIPSEISEELMTPQKVELHWIPSSSSWSTSENPNVLNSSYPSSEAPSYTHTSFEDEPSRNLYFPNTSPAWNEQAVYGQTNFQPLSRPAQAWAPYQSSYPSSRFSSPVPSQNSSFSDQVSSSTYASPSWQNQPSIYAWQMSTKMKAPHAYVDQLVLGSNQNE	270	B-zip transcription factor	P:GO:0006355; F:GO:0003700	P:regulation of DNA-templated transcription; F:DNA-binding transcription factor activity	#N/A	#N/A	DUF3425	G3DSA:1.20.5.170 (GENE3D); PTHR37012 (PANTHER); cd14688 (CDD); IPR046347 (SUPERFAMILY)	#N/A	hypothetical protein GcC1_033009 [Golovinomyces cichoracearum]
aug-contig_110-processed-gene-16.0	MTSGVKDKSVLKPQSIPGHVSHVLGAGGFDVVTNAEAVVVHLVKFSLKPFNVRNVEAAEATISPKCPFRPTAALFSPRQSPIHCKVDFTLKLSGLALKMGNQPSKGSGNSTLKARISPMASADNLQSYPSLSKADTKESNLSFKALRSKIPGSKNDSPRSSSISTSGGSPPDKLDAALVQSGRSPQSARSRASLPDASTIEKAMKLNTLLAPSVNLSEDFQSPTERTLPPPTPVRPRSAENGFPNMEVRRRSSEVNSVSDKPLSGTVNPLAPLDQAGESILVRRPSLKAARLSVDNASSTSKYQMSMGDIREADVDEYIKRLLDTGYDGKHTKTVCLKNAEIVTICSKARELFLEQPPLIELDAPVKIVGDIHGQYTDLIRMFEMCGFPPNANYLFLGD…	639	serine threonine-protein phosphatase	F:GO:0004722; F:GO:0016787; C:GO:0005634; C:GO:0005737	F:protein serine/threonine phosphatase activity; F:hydrolase activity; C:nucleus; C:cytoplasm	K06269	map03015,map04022,map04024,map04113,map04114,map04218,map04261,map04270,map04390,map04510,map04611,map04720,map04728,map04750,map04810,map04910,map04921,map04931,map05031,map05034,map05168,map05205	Metallophos,STPPase_N	IPR006186 (PRINTS); G3DSA:3.60.21.10:FF:000006 (FUNFAM); IPR011159 (PIRSF); IPR029052 (G3DSA:3.60.21.GENE3D); IPR031675 (PFAM); IPR004843 (PFAM); PIRSR641768-1 (PIRSR); IPR050341 (PANTHER); IPR029052 (SUPERFAMILY)	T	hypothetical protein Golomagni_01822 [Golovinomyces magnicellulatus]
aug-contig_110-processed-gene-16.1	MLEVSTANFSASSSSFSNIANEIIARDVGFPDFSDLSPQNILPKVEATAGLGGDNFTAKTLGLADKYRVYLWNYCRIVGAESNCTDAKFNWAAETLDSKIIEQNARTSAGTNITLPNEMKAGLKSFVFVSKLTQFFYISALISGTAEFIFGIIAIFSRVGFCLTLLVSGMATFTILIASIVATTQVTLVTAALEGTARAFGVESKINTHFLATTFLAVALSVGAGISWSLTSCCCCCATGSSRSRDGGGNKGVDTEKYGSNNPYSRMNDSQTSGLK	276	SUR7/PalI family	P:GO:0031505; C:GO:0005886; C:GO:0051285	P:fungal-type cell wall organization; C:plasma membrane; C:cell cortex of cell tip	#N/A	#N/A	SUR7	IPR009571 (PFAM); IPR052413 (PANTHER)	#N/A	putative integral membrane protein [Golovinomyces cichoracearum]
aug-contig_110-processed-gene-16.3	MEESLLLDFPNGECAPLPDSTIFSSEAEAFGWAQRQASTGGYAFSNLYKNKSKVTGDIILSCYNCDKGPKTYQNKPTTSSKSKQRDGTGSKKCGCQYKITIKPNESKKWVIIPKKSHNHGRNSSSIAHPAHRIAALQNTLRAEILNAANSGSSISQIMSAFREREGFNLIGKDISNIIQKERQKQLGGMTPLQWLLKELQDNGYNTRFETKDGNILSKLMYLHPQAIQLWKDHPDVLLMDCTYKTNRFNMPILNICGVTGGNKVIQLGLVFLSSEKENDYSWVLQQLKQIMTLEAIRAPLSIVTDRELALMKSLEAHFSDTPHLLCRWHVNMNVLAKSKKYFPKPTKKGNSYVRSPIFVEFLKQWNAVLAATSEETYKQEVAKLEAMAPKDAYIYVERT…	753	#N/A	#N/A	#N/A	#N/A	#N/A	MULE	IPR018289 (PFAM); IPR052579 (PANTHER); cd07177 (CDD)	#N/A	hypothetical protein K3495_g3010 [Podosphaera aphanis]
aug-contig_110-processed-gene-16.5	MHRTYSMRQSRAPMASQLLNPAPPKSSTKSGRFFGKSGIGHALRRQTAGQLGPDLAKKLSQLVKMEKNVMRSMELVSRERMEVAHQLSIWGEACDEDVSDITDKLGVLIYEVGELEDQYIDRYDQHRVTIKSIRNIEASVQPSRERKQKITDQIAQLKYKEPSSPKILVLEQELVRAEAESLVAEAQLSNITREKIKAAYSYQFDALREHCEKIAIIAGYGKYLLELIDDSPITPGETRTAYDGYETSKAIIQDCEDALSNWVETSAKVEVNLSSRARTLSLRRRSDIRRQDQGHDLTNQDTPMEHNLWGHIDSHKTKLGDEVEEVEEAGMGRPQEIDRDSEAAYREHEIALT	353	Eisosome component PIL1	P:GO:0006897; P:GO:0070941; F:GO:0008289; C:GO:0005886; C:GO:0036286	P:endocytosis; P:eisosome assembly; F:lipid binding; C:plasma membrane; C:eisosome filament	#N/A	#N/A	Pil1	G3DSA:1.20.1270.60:FF:000005 (FUNFAM); IPR027267 (G3DSA:1.20.1270.GENE3D); IPR028245 (PFAM); IPR028245 (PANTHER)	#N/A	Sphingolipid long chain base-responsive protein PIL1 [Golovinomyces cichoracearum]
aug-contig_110-processed-gene-16.7	MGVTGLWPILAPSARPTPLPTLNRKRLAVDASIWIYQFLKAVRDKEGNALPNSHVVGFFRRICKLLYYGILPVFVFDGGAPILKRQTIQNRKKIREGRREDAVRTAGKLLALQMRRREEEEEEERKRKKEKQKNGPVQVEEEEDVVIDKNTVYVDETGMSIQERNQNRKFRKTDAYHLPELTNGIEGMGQPNDPRVMSTEELEEYAKQFNNGEDVNLYDFSKIDFNGDFFMSLPASDRYNILNAARLRSRLRMGLSKEQLEEMFPDRMAFSRFQIERVRERNELTQRLMNLNGMNDDLIGVSRGRIAGNSNREYVLVKNDGIEGGWVLGVVNTDKGNEGNINRPIDVDNFTQPKDLNVESEEEDEFEDVPVEGLNRLPKLKGTQNLDHEFSVDGLEDDA…	1243	Xeroderma pigmentosum G I-region	P:GO:0006289; F:GO:0003697; F:GO:0004518; F:GO:0004519; F:GO:0004520; C:GO:0005634	P:nucleotide-excision repair; F:single-stranded DNA binding; F:nuclease activity; F:endonuclease activity; F:DNA endonuclease activity; C:nucleus	K10846	map03420	UIM,XPG_I,XPG_N	IPR006084 (PRINTS); IPR001044 (PRINTS); G3DSA:3.40.50.1010:FF:000025 (FUNFAM); G3DSA:3.40.50.1010:FF:000061 (FUNFAM); IPR006085 (PFAM); G3DSA:3.40.50.1010 (GENE3D); G3DSA:3.40.50.1010 (GENE3D); IPR006086 (PFAM); G3DSA:1.10.150.20 (GENE3D); PTHR16171 (PANTHER); cd09868 (CDD); cd09904 (CDD); cd09868 (CDD); IPR036279 (SUPERFAMILY); IPR029060 (SUPERFAMILY)	L	putative dna excision repair protein [Golovinomyces cichoracearum]
aug-contig_110-processed-gene-17.13	MAEEKSSNPTAQSAEFIPWTANKVNNANATDITNYINERLAEYEDENLYGSELHGYFSTDFNDFTMTALKKTTESTKLLRDFLRKRNVFIPKARGLQIATTLIDAASNPFCPMPDEMVNEVIEKFRPISNFAGIQNSKIHTNSGLTSRNSIVTLMKAYTDDQKYGGTPLESFDSKYIIFTDYCNTLSFSTDQRNLAFKVMLRDTALQHYYTNCNPDKPPELNTLHQIIKSYFEGKEHQQSMLVKWNELTLGTILKNNGITNVEVAFNILITELRHIQMCLSPEFRAEKILFAKLLQACRGHPAYRRYHGGHGSKYHHDNYKNNHRNSQSNHNKRKTCFVCRKEGCWSSHHSEGERIQARKRLRDTYNGNKNRHFLSNVDLNENFIETFIQEFEGTDPNN…	1496	Encoded by	P:GO:0015074; F:GO:0003676; F:GO:0035613	P:DNA integration; F:nucleic acid binding; F:RNA stem-loop binding	#N/A	#N/A	RVT_2,rve	IPR036397 (G3DSA:3.30.420.GENE3D); IPR013103 (PFAM); IPR036397 (G3DSA:3.30.420.GENE3D); PTHR41694 (PANTHER); IPR001584 (PROSITE_PROFILES); IPR012337 (SUPERFAMILY)	L	hypothetical protein K3495_g2637 [Podosphaera aphanis]
aug-contig_110-processed-gene-17.18	MMLCFKTMEIHRCRFVPLPPSSINALAFSHSKVTEDQITAPLRLAVGRANGDIEIWNPLKGSWLQETIIRGGKDRSIDGLVWIQDHNEEIEGKLLTGRSRLFSIGYTTTITEWNLATGQPLRQASGNHGEIWCIAAQPALSSTSRAKNEQKGQNLVVGCTDGALVLYSTHDFDLQFEKLLVRPSSKKAKIISLTFQDRNIVVAGCTDSTIRVLDIRTSTLLRAMTLGSGLKGGPKDIIVWAVKALKDGTIISGDSTGELKIWDGKTFTLRQRILAHKQDVLCLTTNFNGTAIFSGGMDRRTVLYKPVAKFKGRWIEVAHRRFHGHDVKAMTSFEGPDLSVFVSGGHDASPIVVPIGKYGFENQRALPFLSQNPAIQSAPKTRLLVSWWDREVWIWRIEQ…	920	WD40 repeats	P:GO:0000462; F:GO:0003723; F:GO:0005515; C:GO:0030686; C:GO:0032040; C:GO:0034455	P:maturation of SSU-rRNA from tricistronic rRNA transcript (SSU-rRNA, 5.8S rRNA, LSU-rRNA); F:RNA binding; F:protein binding; C:90S preribosome; C:small-subunit processome; C:t-UTP complex	K14548	map03008	WD40	IPR015943 (G3DSA:2.130.10.GENE3D); IPR001680 (PFAM); IPR046351 (PANTHER); IPR036322 (SUPERFAMILY); IPR036322 (SUPERFAMILY)	#N/A	hypothetical protein Golomagni_01248 [Golovinomyces magnicellulatus]
aug-contig_110-processed-gene-17.9	MSFQVPDQIIDSSEDETSSLFQESYAMSEEAHRATASNEDTRNTAHQMNESRTPYVHSHQKFSQPGTSNTPNFPPGVYQSICEQITHNVMNHLQNLLPQLMLPQVTSSPQDASPQTYPAQVSSTSPPTHEKKPSKWPVWDGSDASFEAHIFNLKVKVEEDRQFLGSDRAVCLSMFSSIPTDKQPRIMQWYRTGGPDSSYNWQSFLVHITDQLENKQARQTAKSQLQRMRMGQNRIFIDLLQDFELKLTQCNCSHWSDDSKISLLESGINNTLRNLLLSKSLPEDDYSKWVSKVKSVAGRLKNSLYQQKQSSGKQIWYLSQSETNSQNFRENSRAKNSIEVDADGDTKMGGVNSMTIAQAVINALGSNKYKKGDRKPPARWRSPDEFKRLSNEGKCTRCC…	453	#N/A	#N/A	#N/A	#N/A	#N/A	#N/A	#N/A	#N/A	hypothetical protein K3495_g12075 [Podosphaera aphanis]
aug-contig_110-processed-gene-18.23	MEVDTEFPALPAVTRPISPSPSALRSPTPSPPLTTPDQTTVNEDNTSTQSRRPILNLVAPSKRAAQYSTDPTTHTLEMYKGNIEKQEADLIRGYLQQAIARLAAPNNSSKPLRTNSRSQGKDLQNKKFPSGSSKPPIGQNIFKPQEAIFEDHSKGTAEENSWATVASNTNNAQNKKFKDTISDSRLFVRLPINHEWRKLSPAGLRKFIVKSLGVSPASIGLIKPVRTGFALSPCSSEARETLLQTSSGLLKTRAKLELASNWTPLLVPTVPRSIFTLEGRVEVTKEMLANEIERVTSFRPASVRFYGASNLESPHRTWIAFFTNAPRPGFRAFDESGRVTIFKKQKVIDFCKRCNGHHPSRNCSRAPSCGNCGSSMHVENDCKSLTKCKNCGGPDCSDS…	745	EKA-like protein	F:GO:0003824	F:catalytic activity	#N/A	#N/A	#N/A	IPR005135 (PFAM); IPR036691 (G3DSA:3.60.10.GENE3D); IPR036691 (SUPERFAMILY)	#N/A	putative eka-like protein [Erysiphe necator]
aug-contig_110-processed-gene-18.28	MFTILFFISLLAWVPAVLGVYDNMARNSVSVYWGQNALNQSDGPVAQHRLSHYCNNTNIDLIIISFLKALNDEVVNFASATDLCQPIPGTNLDYCPEIEEDITECQETYGKTIVLSIGGAAYNESGFSSEEDAINAADEVWTNFGPLIADTTSRPFGQAVVDGFDFDFEVPTTNMVPFADRLRFLMDQSTESGDKNYYLTAAPQCPYPDSQFGPLLDGSISFDAIMVQFYNNFCGADTFLPGNATQQTFNFATWDNWAKSVSRNPDVKIMLGIPGGETGSKTGYVWGDSLTSLIEYSATFSSFGGVMIWDMTELYNNTGFLDTITTALYSTDVSFIADYEPVLEEPIHFTYKPDPPKSAAAPVWADKGAWTKLIFASLTLILA	383	Fungal cellulose binding domain	P:GO:0005975; F:GO:0004568; C:GO:0005576	P:carbohydrate metabolic process; F:chitinase activity; C:extracellular region	K01183	map00520,map01100	CBM_1,CBM_19,Flocculin_t3,Glyco_hydro_18	G3DSA:3.20.20.80 (GENE3D); IPR001223 (PFAM); IPR050542 (PANTHER); IPR001223 (PROSITE_PROFILES); IPR045321 (CDD); IPR017853 (SUPERFAMILY)	G	Endochitinase 33 [Golovinomyces cichoracearum]
aug-contig_110-processed-gene-18.33	MEESLLLDFPNGECAPLPDSTIFSSEAEAFGWAQRQASTGGYAFSNLYKNKSKVTGDIILSCYNCDKGPKTYQNKPTTTSKSKQRDGTGSKKCGCQYKITIKPNESKKWVIIPKKSHNHGRNSSSIAHPAHRIAALQNTLRAEILNAANSGSSISQIMSAFREREGFNLIGKDISNIIQKERQKQLGGMTPLQWLLKELQDNGYNTRFETKDGNILSKLMYLHPQAIQLWKDHPDVLLMDCTYKTNRFNMPILNICGVTGGNKVIQLGLVFLSSEKENDYSWVLQQLKQIMTLEAIRAPLSIVTDRELALMKSLEAHFSDTPHLLCRWHVNMNVLAKSKKYFPKPTKKGNSYVRSPIFVEFLKQWNAVLAATSEETYKQEVAKLEAMAPKDAYIYVERT…	753	#N/A	#N/A	#N/A	#N/A	#N/A	MULE	IPR018289 (PFAM); IPR052579 (PANTHER); cd07177 (CDD)	#N/A	hypothetical protein K3495_g3010 [Podosphaera aphanis]
aug-contig_110-processed-gene-19.102	MTNTIDKDPILEDVTLEFSNSFSLTKAPILSTPEHHDLGDPKFRHDFSSDFKKKEMKTREYIRYKYETKRTAREVLAGGWKRVAMQFSDDMLEDVWAVVNELEVAVAQIANIGENSDVEKNCTSKVSSEILRHTDYTTGLPVQNTQNDEGLNESGTDIQKSKHLMCNITGLEISKVPDDGHLSEKENEKGTILRPRFTKLGDGGLESDFNTGNEATIVIPKPMFKDLGDGGLETDITNLVISSSTVPPPEKKSMKESPIKFFVLADTSYGSCCIDEIAAQHCDAEVVIHYGRSCLSPTKRLPIIYVFTANSLDLKSIIQSFEKTFDKKNTPVLLMADIMFHDHIKKIQKGLEERGYTNTFAPEVVHDPASRIPNRKIASEVALEEYSLFHISEPPPALI…	700	Required for the first step in the synthesis of diphthamide, a post-translational modification of histidine which occurs in translation elongation factor 2	P:GO:0017183; F:GO:0090560	P:protein histidyl modification to diphthamide; F:2-(3-amino-3-carboxypropyl)histidine synthase activity	#N/A	#N/A	Diphthamide_syn	G3DSA:3.40.50.11860:FF:000001 (FUNFAM); IPR042263 (G3DSA:3.40.50.GENE3D); IPR016435 (PFAM); IPR016435 (NCBIFAM); IPR042265 (G3DSA:3.40.50.GENE3D); IPR010014 (NCBIFAM); IPR016435 (SFLD); SFLDG01121 (SFLD); SFLDF00408 (SFLD); IPR016435 (PANTHER)	J	hypothetical protein Golomagni_01283 [Golovinomyces magnicellulatus]
aug-contig_110-processed-gene-19.106	MSTNLEAPTSSVSHDIHTQTISTFVQNIFQNYGLSEIAITDIDEKKFGSSVIDLENMTKGELASTIITYITYYVDQDLYDEELFWEFKQDFIGWKRHHFDTAGILKKDLKRILLERGIFVASKGYADSLALEMVINEKEIHVWTTEEIKTALKRNINYHPKIGILKNIQTPHISPKIEESNNQDQRQTPIRSNTKQPSEPPTNFPIKQRYSATPFQSIGPQLSEYDNQNIVVKSQLESFWTLPPVPVQTELIDPDIIVKFVKCFDNKKRYTGEPYDILEDKKCIFLALAENMNIRPGQLHAVFPRILTGRAEWYFINHMRPYDMFSTMYVQLKQHFDTEVNHEHYYTDWTTTSFDKLRQEFSSESLHQILQRLFDKLLLCQRALGPAYAGQQPLKTTLI…	1724	Encoded by	P:GO:0015074; F:GO:0003676	P:DNA integration; F:nucleic acid binding	#N/A	#N/A	RVT_2	IPR013103 (PFAM); IPR036397 (G3DSA:3.30.420.GENE3D); IPR050951 (PANTHER); IPR001584 (PROSITE_PROFILES); IPR012337 (SUPERFAMILY)	L	RVT 2 domain containing protein [Pyrenophora teres f. teres]
aug-contig_110-processed-gene-19.111	MEDTKTSIRAVPEIKTPTINKPRLGGSQSAAQRKIQSFFTRSPINNSPTVLNSSSKKKDSLQKDGGKTKLEMPLKQPRFKKNTPEPTCHDSQSLSPQNKYVEGAISPFESSFTPTATQSRKAKKILSYAESESDSDDEILNPSQKRRKGIKARAIKVLDDTDEEAAFCDSPSEATDEDTVNMDNYENEDKSNKRKRHQTSDKSQKRTSNAPPVAQTNEAYDPDDVDIPNSSTVEQWKYNPEDTGRLNLKPSKNLNTPKSIPKNRKEKAHKSEPEKRYPWLAEVRDIEGNPVGHPDYDSRTVFIPPYAWNKFSPFEHQYWTIKQKFWDTIVFFKKGKFYELYENDATIGHQLFDLKLTDRVNMRMVGVPESSLNHWATQFVAKGYKIARVDQCESALGKE…	1184	Component of the post-replicative DNA mismatch repair system (MMR)	P:GO:0006298; F:GO:0003690; F:GO:0005524; F:GO:0030983; F:GO:0140664; C:GO:0005634; C:GO:0032301	P:mismatch repair; F:double-stranded DNA binding; F:ATP binding; F:mismatched DNA binding; F:ATP-dependent DNA damage sensor activity; C:nucleus; C:MutSalpha complex	K08737	map01524,map03430,map05200,map05210	MutS_I,MutS_II,MutS_III,MutS_IV,MutS_V	G3DSA:3.40.1170.10:FF:000002 (FUNFAM); G3DSA:3.30.420.110:FF:000006 (FUNFAM); G3DSA:1.10.1420.10:FF:000019 (FUNFAM); G3DSA:3.40.50.300:FF:000771 (FUNFAM); IPR016151 (G3DSA:3.40.1170.GENE3D); NF003810 (NCBIFAM); IPR000432 (PFAM); IPR027417 (G3DSA:3.40.50.GENE3D); IPR007860 (PFAM); G3DSA:1.10.1420.10 (GENE3D); IPR007696 (PFAM); IPR007861 (PFAM); IPR017261 (PIRSF); IPR036678 (G3DSA:3.30.420.GENE3D);…	L	DNA mismatch repair protein msh6 [Golovinomyces cichoracearum]
aug-contig_110-processed-gene-2.27	MEESLLLDFPNGECAPLPDSTIFSSEAEAFGWAQRQASTGGYAFSNLYKNKSKVTGDIILSCYNCDKGPKTYQNKPTTTSKSKQRDGTGSKKCGCQYKITIKPNESKKWVIIPKKSHNHGRNSSSIAHPAHRIAALQNTLRAEILNAANSGSSISQIMSAFREREGFNLIGKDISNIIQKERQKQLGGMTPLQWLLKELQDNGYNTRFETKDGNILSKLMYLHPQAIQLWKDHPDVLLMDCTYKTNRFNMPILNICGVTGGNKVIQLGLVFLSSEKENDYSWVLQQLKQIMTLEAIRAPLSIVTDRELALMKSLEAHFSDTPHLLCRWHVNMNVLAKSKKYFPKPTKKGNSYVRSPIFVEFLKQWNAVLAATSEETYKQEVAKLEAMAPKDAYIYVERT…	753	#N/A	#N/A	#N/A	#N/A	#N/A	MULE	IPR018289 (PFAM); IPR052579 (PANTHER); cd07177 (CDD)	#N/A	hypothetical protein K3495_g3010 [Podosphaera aphanis]
aug-contig_110-processed-gene-20.13	MPLLLSKNVVHQLKIANFLPKHYREISTSCTLSQVGPEHPSYIDVPGQAPFQRPLRARDIKGTLPPPRDVLKTRALRTPKNHPKFLLKTIPEPKAPKEAQNEFEAWKRRTAELRKANLRESLIELHQRKSERKENLERLSVGRRNRRERLLNAPQREDERLTNPTVTQLNSNLQKGAVSDPNRESRILEKVARVRAKEEAKMQARMDAIHTLYMNARNFITTEKLLEARIQEIFTEEPFMKGNLDDNIWEVLGSPPTVRDLLKRNEGNSRAAVEAHQSPAVITGERMQAIAEELTGGKMEEDNETPTED	309	#N/A	#N/A	#N/A	#N/A	#N/A	#N/A	cd23703 (CDD)	#N/A	hypothetical protein GcC1_040022 [Golovinomyces cichoracearum]
aug-contig_110-processed-gene-20.14	MAWTLPVNSSSRSKLQKKRRGQENISKICSRDVLDAVRKSSIGLCLQSQEALGVMTGRFTSPEPQLQRLLNHHSSTVSNTSASLYSVDQMQQQIVQRTRPKTPILRVGQREDITERSHGLSRELAANYQAVLPTREIGDEVVSPHQPLRKLRKVKSQISLRDLSRDQADGRVRIPTTDSDGDVDTLVGSEPPSPDSKIHDEFWRIPSIRKPSYPSTKSAKGDGDIGLQICVDLLTNELASILFRHHPAEENDRASELQILLMIEAYETIQRQIHENQMDTNVTAYHMSRLEQLLESWLDVLYDLYERSRACNEPNFKCSDPGYLTPSTTMNFARAQVPV	339	#N/A	#N/A	#N/A	#N/A	#N/A	#N/A	#N/A	#N/A	hypothetical protein Golomagni_00442 [Golovinomyces magnicellulatus]
aug-contig_110-processed-gene-20.16	MYLTRVFFIALLCGVMAMPTKNVVSDPAKVAENSSQETTKEIFSSNTEFVGKIREHSISSSPLTNQTDTTTSETTTTIVSEFKQGAKIPNRASLSTNNLTRVLVLDTHNKKLAKRSPFGTASVRKLLRCFRFDDKRADHEDYNTNRKQGSWRFSKEHHKGWIFKIFR	167	#N/A	#N/A	#N/A	#N/A	#N/A	#N/A	#N/A	#N/A	hypothetical protein GcM3_052004 [Golovinomyces cichoracearum]
aug-contig_110-processed-gene-20.17	MTARPGEDLAAILFSDVHYFHSPPTAKPLHDRFDKGSYVYLFENAQERRARIEIANNAGTPDQDAFDGHLDEVRIKYSFKHPTLISFTIEKVEGQEWHLLSFDLKNEQKHLYKLLLVDLYLWTYEDAIQLLNAIRRLLPPQQITVLDEPVTPQMHINHIQRNLAVHKLDHKFISDPSFLQARAMESHHMLPGPPISATPNNQHLSNYVPLAYNPAAPAAPEAISHREKTPPIEDGGFHPLRAAISSEQKLSAEICEPTSQNNKTINILETFGSVSDMSIHASPKIQPSAMLPITAHYKSPSNDLTTSHPTPSDQCQAPPFMAKQVQSNIPVTQYAKYPTSPGVPRIMSTPSLFSPGINFPALTPEDDIKYLYINDSRTPFTQTQIDYPTPQTKCREMEN…	439	#N/A	#N/A	#N/A	#N/A	#N/A	#N/A	#N/A	#N/A	hypothetical protein Golomagni_01914 [Golovinomyces magnicellulatus]
aug-contig_110-processed-gene-21.1	MIDFEKKSFSVAAISILFNPIFWNYVARQEYRSKCLTKLAGGNSRLACYFLGLTIFSLGIIRDLLYERAIREQPAFSPLLAPFFKILSYCLLAAGNTLVFSSIWALGITGTYLGDYFGILMENVVTGFPFNITSAPMYYGSTMNFLGTAIYFGKPAGILLTLEVLTVYLIALRFEDPFTKEIYAKRDLKKK	191	Catalyzes the second two steps of the methylation pathway of phosphatidylcholine biosynthesis, the SAM-dependent methylation of phosphatidylmonomethylethanolamine (PMME) to phosphatidyldimethylethanolamine (PDME) and of PDME to phosphatidylcholine (PC)	P:GO:0006656; F:GO:0008757	P:phosphatidylcholine biosynthetic process; F:S-adenosylmethionine-dependent methyltransferase activity	K00551	map00564,map01100,map01110	PEMT	G3DSA:1.20.120.1630:FF:000005 (FUNFAM); IPR024960 (PIRSF); IPR007318 (PFAM); G3DSA:1.20.120.1630 (GENE3D); IPR024960 (PANTHER); IPR024960 (HAMAP); IPR024960 (PROSITE_PROFILES)	I	Phosphatidyl-N-methylethanolamine N-methyltransferase [Golovinomyces cichoracearum]
aug-contig_110-processed-gene-21.5	MITGTIKQLSPAETQYLQISNLREVPPSPHSQSNPVHIEPQSPTNRRRSSGPDNSDNINDEHRSEVIEVVSSESASKSLTKWQKFMSQENISRSSAPYAQSPQIVPSDIKTRNSSCFSLNSTHVTLPRSSVSSDDVKSYCGNKVKVRNLAHIRSFVLDDLSHFRRQPGRRLRDRNDTPTYEISGMPITDVIEMVAGLLTKIVTTNDRQNTSRNRSPQPTDNTDSTKNNQSSVAAFHGKNVPNITILSYLSRIHKYCPTTYEVFLSLLVYFDRMTERVNKVLVQTSEINVKDSSDSLESSESSVSAKTPPLSPSRSNDGKCNLRTPPNTADGPPKSSRQEASASRLFVIDSYNIHRLVIAGVTCASKFFSDVFYTNSRYAKVGGLPLTELNHLELQFLLI…	448	Cyclin	P:GO:0000079; F:GO:0016538; F:GO:0019901; C:GO:0000307; C:GO:0005634	P:regulation of cyclin-dependent protein serine/threonine kinase activity; F:cyclin-dependent protein serine/threonine kinase regulator activity; F:protein kinase binding; C:cyclin-dependent protein kinase holoenzyme complex; C:nucleus	#N/A	#N/A	Cyclin	IPR013922 (PFAM); G3DSA:1.10.472.10 (GENE3D); IPR013922 (PANTHER); cd20558 (CDD)	#N/A	PHO85 cyclin-7 [Golovinomyces cichoracearum]
aug-contig_110-processed-gene-21.6	MENPTDKDVARTVTVSDGVSIKDDDEILSASNVPVNDDSMVRSAFIPRIDRLMSEDMGFEVVQILVGPEKKLFTIHRDLLLATGDAFVKAFDPKKNTKGRITMSSKSPDIFKLFVDMIYTRQVPAVTSFMTDVAKDLRVRNLCQLYVFTEELDLLPIIRNQIFDRIQDGFLLLDKLPEIPLISSVYRNTSAASQLRKFIASCLVHKVRSNLNFEMDTIAELFKSNEDIVKDFLAMVHYFVPGQDPRIRNCEGQPGCLECLDKVGNVAKAPGVWPCSFHIHTDRDGVELSDNEVNCHLWCKE	301	#N/A	F:GO:0005515	F:protein binding	#N/A	#N/A	#N/A	IPR011333 (G3DSA:3.30.710.GENE3D); IPR000210 (PFAM); IPR000210 (PROSITE_PROFILES); IPR011333 (SUPERFAMILY)	#N/A	putative btb poz domain containing protein [Golovinomyces cichoracearum]
aug-contig_110-processed-gene-23.114	MISRTLRIGLIPGDGIGKEVIPAGRRVLEALSSSHKLKFEFVDLKAGFETFEETGSPLPEKTVEVLRKECDGALFGAVSSPSTAVKGYSSPIVALRKKLDLYANIRPVKSVATARNSIDMVIVRENTEDLYVKEERTFEAADGSKVAEAIKRISERASSRISIMAGEIALRRQRARSTGAPSIHKSPLVTITHKSNVLSQTDGLFRTTSKKILADARFSEVKVEEQIVDSMVYKLFRQPETYDVIVAPNLYGDILSDGAAALVGSLGLVPSANVGENFVIGEPCHGSAPDIMGRNIANPIATLRSVALMLEFMNEDAAAADIYRAVDGNLTDGELLNPDLGGTATTTKVIEDILRRL	357	Homoisocitrate dehydrogenase	P:GO:0006099; P:GO:0006102; P:GO:0009085; F:GO:0004449; F:GO:0047046; C:GO:0005739	P:tricarboxylic acid cycle; P:isocitrate metabolic process; P:lysine biosynthetic process; F:isocitrate dehydrogenase (NAD+) activity; F:homoisocitrate dehydrogenase activity; C:mitochondrion	K05824	map00300,map01100,map01120,map01130,map01210,map01230	Iso_dh	G3DSA:3.40.718.10:FF:000012 (FUNFAM); IPR024084 (PFAM); G3DSA:3.40.718.10 (GENE3D); PIRSR604439-2 (PIRSR); PIRSR604439-4 (PIRSR); PIRSR604439-1 (PIRSR); PIRSR604439-5 (PIRSR); PIRSR000108-3 (PIRSR); PIRSR604439-3 (PIRSR); PTHR11835 (PANTHER); SSF53659 (SUPERFAMILY)	E	Homoisocitrate dehydrogenase [Golovinomyces cichoracearum]
aug-contig_110-processed-gene-23.123	MSYGQKGDVAGKSSNFGIPHFCFLAGLASGVFSAVLLQPADLLKTRLQHSGSSSLVSAFCEISGPSRSVLNFWRGTAPSVLRTGLGSAIYFTSLNNLRRNVAQSQFLHYMRIKSKVGSSHSSSLPELSNLANLITGAVARACAGFVLMPMTVIKVRFESNLYNYKSIFEAGKDIFITEGCKGFLSGIGATTARDAPYAGLYVLFYEQSKKRLSSLTLNNIAIDNDSVTLGGPKSAYVNFSSGVVAAGLATALTNPFDAIKTRIQLQPTLYQNVLHACKKMIREDGLKSLFDGLGLRVARKALSSALAWTLYEEVIRRAELQFG	323	Mitochondrial carrier required for the biosynthesis of heme, possibly by facilitating 5-aminolevulinate (ALA) production. May act by importing glycine into mitochondria or by exchanging glycine for ALA across the mitochondrial inner membrane	P:GO:1904983; F:GO:0015187; C:GO:0005739; C:GO:0005743	P:glycine import into mitochondrion; F:glycine transmembrane transporter activity; C:mitochondrion; C:mitochondrial inner membrane	#N/A	#N/A	Mito_carr	G3DSA:1.50.40.10:FF:000103 (FUNFAM); IPR023395 (G3DSA:1.50.40.GENE3D); IPR023395 (G3DSA:1.50.40.GENE3D); IPR018108 (PFAM); PTHR46181 (PANTHER); IPR018108 (PROSITE_PROFILES); IPR018108 (PROSITE_PROFILES); IPR030847 (HAMAP); IPR018108 (PROSITE_PROFILES); IPR023395 (SUPERFAMILY)	C	Mitochondrial glycine transporter [Golovinomyces cichoracearum]
aug-contig_110-processed-gene-23.129	MTENTKDITVKRDRPDDINDEEEACSSDDMGPQLPSENAPKRKRRKLPYEKLYVSALPKSTRYSKSLMHKEQLAFITMTPTTDFLITSSIDGAVKFWKKVSEGIEFVKEYRAHIGEIKSVSVSTDGRWFATAGADKTVKIFDVVTFDLLSMILMESTPSDMIEYWSPSENYEKPASVFKFKSSTDLFEFKKNKVTPTSLTISPSGSLFCTISFPDRRIRIFKFATGKLYRTYDESLEAIEEMQQANTALQKLEDVEFGRRLGTERELDAPELRNKANVIFDETGNFIIYGSMFGTKVINTYTNRVVKVYGKDENYRPLHIALCQGEPSKKGITTVAMAASNNPLLQESEIRDPILFNTGIGKVRFYMYSNDENISKSDRDVLNEKPKNSTMSKTAETKT…	555	WD domain, G-beta repeat	P:GO:0000413; F:GO:0003755; F:GO:0005515	P:protein peptidyl-prolyl isomerization; F:peptidyl-prolyl cis-trans isomerase activity; F:protein binding	#N/A	#N/A	Pro_isomerase,WD40	IPR002130 (PRINTS); G3DSA:2.40.100.10:FF:000003 (FUNFAM); IPR029000 (G3DSA:2.40.100.GENE3D); IPR002130 (PFAM); IPR015943 (G3DSA:2.130.10.GENE3D); IPR001680 (PFAM); IPR044666 (PANTHER); IPR001680 (PROSITE_PROFILES); IPR001680 (PROSITE_PROFILES); IPR002130 (PROSITE_PROFILES); PS50294 (PROSITE_PROFILES); cd01927 (CDD); IPR029000 (SUPERFAMILY); IPR036322 (SUPERFAMILY)	O	Peptidyl-prolyl cis-trans isomerase cyp15 [Golovinomyces cichoracearum]
aug-contig_110-processed-gene-24.127	MSSKKEICIAIIGLGGVGKCFLSQLKSLSEQFSKSTTSPNISLILISRTNKILYNKNYQSLPFEDIYDSLERSTHSHLKISEIIDYLEAAPSKVILVDNTSSQDIADSYPKILEKKISIVTPNKKAFSGSRKLWEDIFTAATPGTHIYHESSVGAGLPIISTLKDLIDTGDEIIKIEGVFSGTMSFLFNSFAPVEGSGGTWSAEVKRARELGFTEPDPRDDLNGLDVARKLTILARLVGLQVDSPRSFPVQSLIPKELEDMASADEFLTNLPKFDAHMEEIRVSAEKEGKVVRYVGSIIVATNEIKVGVEKFSFSHPISKLMGGDNIISFHTKRYSDSPLIIQGAGAGGDVTAMGVTGDLIKVIRQIS	368	Homoserine dehydrogenase	P:GO:0006520; P:GO:0009067; P:GO:0009090; F:GO:0004412; F:GO:0016491; F:GO:0050661	P:amino acid metabolic process; P:aspartate family amino acid biosynthetic process; P:homoserine biosynthetic process; F:homoserine dehydrogenase activity; F:oxidoreductase activity; F:NADP binding	K00003	map00260,map00270,map00300,map01100,map01110,map01120,map01130,map01230	Homoserine_dh,NAD_binding_3	G3DSA:3.30.360.10:FF:000006 (FUNFAM); G3DSA:3.30.360.10 (GENE3D); IPR005106 (PFAM); IPR001342 (PFAM); IPR022697 (PIRSF); G3DSA:3.40.50.720 (GENE3D); PIRSR000098-1 (PIRSR); PIRSR036497-2 (PIRSR); PIRSR000098-2 (PIRSR); IPR011147 (PANTHER); IPR036291 (SUPERFAMILY); SSF55347 (SUPERFAMILY)	E	hypothetical protein Golomagni_03783 [Golovinomyces magnicellulatus]
aug-contig_110-processed-gene-24.128	MDWSCHYPAFIVNSNEGASVKVEDAKSNVLDENTPKSLIKGVEVADIGWMEIRSQVAEYVQERIKALRIKNHASGAFQNTACIRANAMKFLPNFFEKQQLSKIFLCFPDPHFKARKHKARIVSTTLNSEYAYVIRPGGKIYTITDVEDLHKWMVHHFDAHPAFERVSEEEQEADECVHIMREKTEEAMKVERNQGPKYLALFRRVEDPPW	210	Catalyzes the formation of N(7)-methylguanine at position 46 (m7G46) in tRNA	P:GO:0006400; P:GO:0030488; P:GO:0036265; F:GO:0008176; C:GO:0043527	P:tRNA modification; P:tRNA methylation; P:RNA (guanine-N7)-methylation; F:tRNA (guanine(46)-N7)-methyltransferase activity; C:tRNA methyltransferase complex	#N/A	#N/A	Methyltransf_4	IPR029063 (G3DSA:3.40.50.GENE3D); IPR003358 (PFAM); IPR003358 (NCBIFAM); IPR003358 (PANTHER); IPR025763 (HAMAP); IPR003358 (PROSITE_PROFILES); IPR029063 (SUPERFAMILY)	J	tRNA -methyltransferase [Golovinomyces cichoracearum]
aug-contig_110-processed-gene-24.133	MNSSKNLNGSLKSRNKPKEISSTNVLNFTSTLSPLISSARTTSVGRPRASQKKPGIFSAHNKTFKKRAAKDLTNISSQGFSKSKNTGALDIENIDEAKLYRSKRKMEAKSKAYAKMKRNEVPEDTEVLVDFDRKWAERKETGFDSDSDSCAESVDGQGEMLEYEDEFGRVRLKTRSEVKKLERQKKITLMSTEELGTMSARPEMPSKINYGDTVQSMAFNPDEQIAARMEELAKKRDRSLTPPEMRHYEADKEVRTKGVGFFNFSKDEAIRNEEMRALENERLETETRRKEREEKKKERLLEIEERRKIIQQKRAKKQADSFLDNLDVELKFAEASK	337	Domain of unknown function (DUF4078)	C:GO:0005634	C:nucleus	#N/A	#N/A	DUF4078	IPR025066 (PFAM); IPR025066 (PANTHER)	#N/A	Uncharacterized protein GcM3_091020 [Golovinomyces cichoracearum]
aug-contig_110-processed-gene-24.134	MEESLLLDFPNGECAPLPDSTIFSSEAEAFGWAQRQASTGGYAFSNLYKNKSKVTGDIILSCYNCDKGPKTYQNKPTTTSKSKQRDGTGSKKCGCQYKITMKPNESKKRVIIPKKSHNHGRNSSSIAHPAHRIAALQNTLRAEILNAANSGSSISQIMSAFREREGFNLIGKDISNIIQKERQKQLGGMTPLQWLLKELQDNGYNTRFETKDGNILSKLMYLHPQAIQLWKDHPDVLLMDCTYKTNRFNMPILNICGVTGGNKVIQLGLVFLSSEKENDYSWVLQQLKQIMTLEAIRAPLSIVTDRELALMKSLEAHFSDTPHLLCRWHVNMNVLAKSKKYFPKPTKKGNSYVRSPIFVEFLKQWNAVLAATSEETYKQEVAKLEAMAPKDAYIYVERT…	753	#N/A	#N/A	#N/A	#N/A	#N/A	#N/A	IPR018289 (PFAM); IPR052579 (PANTHER); cd07177 (CDD)	#N/A	hypothetical protein K3495_g3010 [Podosphaera aphanis]
aug-contig_110-processed-gene-24.135	MPLSGQRLTPYYGVTTPQEKMAFQQRVGNLIYPAVILRPEKAYAANTLSRFNQNPNAEHIREADHVIAYLAATKYLGIRYDGKIKEENSIFAASDASFAGDISRRSTQGFLVKLFDGSIAWQSTLQRKIVLTTTEAEIMALTSVGREILSIRRLFASICFDPECDNTLLCDNQQTVGCINKDHPQLTTKMKHIDIHHFWIRQECRKGFLAVLWIPTNNQPADGFTKPLSSQKHKDF	236	reverse transcriptase	#N/A	#N/A	#N/A	#N/A	#N/A	PTHR11439 (PANTHER); cd09272 (CDD)	L	Copia protein [Golovinomyces cichoracearum]
aug-contig_110-processed-gene-25.129	MSDTTNENDTTVTRLAEATKAMNALIESKIAEYNKYKFKDNNLWEAFKDDFCECTAEDFKLARLSLQRALRSHLRTFGVWVKWDRNTTIAKSSYNVVKEEVPTEWTFEEISSSNETFSSNEIATIMNKQVKFEPPKTRSVKNYDKSFAKSVAEQDLKQDLYSADDDKPSLKSNKNQGYGKELANLARMYDNEMIYRGEQDSFNFKLAIFLDHFRRADIPDYIRGKAYPTMLSGPALNHYYANIASNSYQTDFETMCQTTQNYFEGAEYKRSRLARWDELTLRVVMKENEGKSTGECLKLLISELRELQLSIQKELRSDNYLHIKLVNAFRKVPACSYACFKPSETLSGLIGDFQAPITTYEEAKESESAQFFTDRRYHRRNEKEQDNTFVKPKPFKFQF…	1526	ADO33890 polyprotein Pyrenophora tritici-repentis	P:GO:0015074; F:GO:0003676	P:DNA integration; F:nucleic acid binding	#N/A	#N/A	RVT_2,rve	IPR013103 (PFAM); IPR036397 (G3DSA:3.30.420.GENE3D); IPR036397 (G3DSA:3.30.420.GENE3D); IPR001584 (PROSITE_PROFILES); IPR012337 (SUPERFAMILY)	L	hypothetical protein K3495_g12593, partial [Podosphaera aphanis]
aug-contig_110-processed-gene-26.37	MASPENSANQKSPNSPQSPRAAKEKGLSLKMEIDHQEKELLGIIEGTTVAFRKKGPQVLLLEHWNKEAILNDDSPSAAITSFAMAFVADWDSIPEVYSPSAVYDELMDYFGHWTEAMFEKIASPYKQTFGEAFKRRGFKKDRLSVSKWIIKIRDDENFIAPGDEYKTLPQPSLLTPVHQPTFPSHLNRSQQSSSHHEQSQPPIQRFQPPLPMQADTYRQIETAEHSHRTTTPMQSAQHNFPSFTNHRNQWETHGNSAHRQTQQPPVQSTEPHNMIVYSWDDYADLPPREIPTSPVSPNLQAQFIKIWRQTDNFTGDPYDLLDDKTRHFLSVCDSISVTPNQFAPLFRLILNGKAQQFFLTRIGRKESFRGIYDKLKRHFDTEKNHHQYYTDWTSSTFTD…	1708	Encoded by	P:GO:0015074; F:GO:0003676	P:DNA integration; F:nucleic acid binding	#N/A	#N/A	RVT_2	IPR013103 (PFAM); IPR036397 (G3DSA:3.30.420.GENE3D); IPR050951 (PANTHER); IPR001584 (PROSITE_PROFILES); IPR012337 (SUPERFAMILY)	L	hypothetical protein PtrM4_026130 [Pyrenophora tritici-repentis] KAF7578373.1 hypothetical protein PtrM4_026130 [Pyrenophora tritici-repentis]
aug-contig_110-processed-gene-27.154	MALKIPHEYNQFKPWIIADRFNDFTLDPTAENAEAGILHTFILQRIAWYSVNEWVGGRLWEYYQDDFEKWDQEMMSKCNKTIINLLRDFLVKHGVYIPVDRKRGNDAKLLAILKETEIHEWTHEEATYQIKHCGGFAQNFDPFYGNLVSTKQSIDDNSQVQLPSFRVPQLNLKSESTPVSESRQYHENVRENPSNLSNLPNPPTGFSKQLIDIERMYTDKSKKYGGELYDVLSSKLLIFYDYCRKVGLEENQYHNAYSSMLKDRASQFFYDFLSHKNYSFSKMMELTKNHFETESNKQEYLTLWRTTTLAKTRIENPDKKTSECFQIMVDSLLRIQRGLWGSYQVDQNIRDQVLNCCQGFKECELALYNPGETFEAVVAQVRNAIHTKEQQTRNAHQFT…	1736	Reverse transcriptase (RNA-dependent DNA polymerase)	P:GO:0015074; F:GO:0003676	P:DNA integration; F:nucleic acid binding	#N/A	#N/A	RVT_2,rve	IPR036397 (G3DSA:3.30.420.GENE3D); IPR050951 (PANTHER); IPR001584 (PROSITE_PROFILES); IPR012337 (SUPERFAMILY)	L	hypothetical protein [Scandinavium sp.]
aug-contig_110-processed-gene-27.158	MTVRTYFKLSWIGPVLDKGCRVTKRIEKQTGTINFLLYDEDVPKTVDNFRTLSTGEKGYGYQGSSFHRIIPRFMIQGGDFIRGDGTGGKSIYGKKFPDENFKLSHCRPGLLSMANAGPNTNSSQFFITTVETKWLDGLHVVFGEVEDEESMKVVKAIEATGSPSGDIQFEERPTIIESGELV	182	PPIases accelerate the folding of proteins. It catalyzes the cis-trans isomerization of proline imidic peptide bonds in oligopeptides	P:GO:0000413; P:GO:0006457; F:GO:0003755; F:GO:0016018; C:GO:0005737	P:protein peptidyl-prolyl isomerization; P:protein folding; F:peptidyl-prolyl cis-trans isomerase activity; F:cyclosporin A binding; C:cytoplasm	#N/A	#N/A	Pro_isomerase	IPR002130 (PRINTS); G3DSA:2.40.100.10:FF:000032 (FUNFAM); IPR002130 (PFAM); IPR024936 (PIRSF); IPR029000 (G3DSA:2.40.100.GENE3D); PTHR11071 (PANTHER); IPR002130 (PROSITE_PROFILES); IPR029000 (SUPERFAMILY)	O	hypothetical protein Golomagni_04163 [Golovinomyces magnicellulatus]
aug-contig_110-processed-gene-27.160	MAGVGAGMKIFHGNTIPTAKPTTPKTDNGTAAIASIECLEHSLGVQMVDLKTVAFYLSKVRDRLVISGEKASSSAMEEVDKTLVALKAHVTALQTKTKTTPMEERMLALEKVVKKSLEGPACKTAPSTIPRSGGRPSYASVAAPPATKAAVRIRVEGAEKLQPAELLNRAKQHITGAYAVRKLRSSDTEVFVQSVSQRDAALSLAQPKEFKILKPDYPVEIVGVPLGTMIEKGKKADNGRIIYEMMEATKVRIPGIKINRVRWLYDGKEHQWSMKNGRTRGSVIVSLPTEALQREVIRNGIVLNAILYTAQLWSPRAQVKQCFNCNQWGHTQASCNKAKRCGECAGAHQTRDCPKTAVSCCNCGKAHRSWQRGSCPNFTAYKASVQRAKFELLERTAEI…	493	Encoded by	F:GO:0003676; F:GO:0008270	F:nucleic acid binding; F:zinc ion binding	#N/A	#N/A	#N/A	IPR001878 (PROSITE_PROFILES); IPR036875 (SUPERFAMILY)	#N/A	hypothetical protein K3495_g13672 [Podosphaera aphanis]
aug-contig_110-processed-gene-27.163	MPDQGDIVPSREASVQGDGTWGVDASGTSTMKGLAKATRERFDKVETSLTIVDQQTAIEPEKGEIDVNESNYGVDPAGDEPNIRGILNKKKVYGGYSGDLNPDDSERNFDGSLNIYRTAQYPDKQHTKNESERFVKSIWPEVRIASDLKGKGIQIKGLPDGAHKFKVYLDNSWKLVQASDVSVFHKLRQIQRVLFQAAIPYDLWPVKFSLMLEGDFQVIQKFIDNTVASWPQALEATFQLMDRHGTMRRPIIQFARLSPFQSEGYANFAWRLRTAFQELPRQPHYDSAIRDMLFETVKTYMPSVWSTIQPKIRMPTAQLVEEMVIHAGIIAQMPVEQAIYSKAGINITLQGQSAPYYQYEISPATPGAPGKAQIVQPNAISTNTGLSISDPRKDDQKAH…	547	transposition, RNA-mediated	F:GO:0003676; F:GO:0008270	F:nucleic acid binding; F:zinc ion binding	#N/A	#N/A	#N/A	IPR001878 (PFAM); G3DSA:4.10.60.10 (GENE3D); IPR001878 (PROSITE_PROFILES); IPR036875 (SUPERFAMILY)	#N/A	hypothetical protein GcC1_019036 [Golovinomyces cichoracearum]
aug-contig_110-processed-gene-28.122	MEESLLLDFPNGECAPLPDSTIFSSEAEAFGWAQRQASTGGYAFSNLYKNKSKVTGDIILSCYNCDKGPKTYQNKPTTTSKSKQRDGTGSKKCGCQYKITIKPNESKKWVIIPKKSHNHGRNSSSIAHPAHRIAALQNTLRAEILNAANSGSSISQIMSAFREREGFNLIGKDISNIIQKERQKQLGGMTPLQWLLKELQDNGYNTRFETKDGNILSKLMYLHPQAIQLWKDHPDVLLMDCTYKTNRFNMPILNICGVTGGNKVIQLGLVFLSSEKENDYSWVLQQLKQIMTLEAIRAPLSIVTDRELALMKSLEAHFSDTPHLLCRWHVNMNVLAKSKKYFPKPTKKGNSYVRSPIFVEFLKQWNAVLAATSEETYKQEVAKLEAMAPKDAYIYVERT…	753	#N/A	#N/A	#N/A	#N/A	#N/A	#N/A	IPR018289 (PFAM); IPR052579 (PANTHER); cd07177 (CDD)	#N/A	hypothetical protein K3495_g3010 [Podosphaera aphanis]
aug-contig_110-processed-gene-28.127	MVGESDGVAENSQNNTTRQPNTTEQVAATGTVANAQMDKNLEIIRRLLKKLRNVYTGEGTVKDLPEETDVAAAIKAFNIHKKEWDQCRTQTTPIEERMLALEEVVRKSLAEPAQKAGSASVSGSPAPKTYASVVAPPMIKTAVRIRVEGAKDLQPAELLQRAKEHIPGAYAVRQMRSNDTEVYVQSASQRDTALNMAQPEGLKILRHDFPVEVCGVPLRTKIEGGKNANNNDLITEIVNATKVRIPEIKINRIRWLHDGKEVERAKKNGRTRGSVVLSLPTETLQEQVVRHGIVINAMLYTAQVWSPRAQPKQCYNCSQWGHTQASCGKKAQCGECAGAHQTRDCPRKRVSCCNCGKEHRSWQRGACRTYQVYKGSVQKARLELLERTAEIRKEKVPAM…	445	Encoded by	F:GO:0003676; F:GO:0008270	F:nucleic acid binding; F:zinc ion binding	#N/A	#N/A	#N/A	IPR001878 (PROSITE_PROFILES)	#N/A	AIR1 domain-containing protein [Blumeria hordei DH14]
aug-contig_110-processed-gene-28.136	MEESLLLDFPNGECAPLPDSTIFSSEAEAFGWAQRQASTGGYAFSNLYKNKSKVTGDIILSCYNCDKGPKTYQNKPTTTSKSKQRDGTGSKKCGCQYKITIKPNESKKWVIIPKKSHNHGRNSSSIAHPAHRIAALQNTLRAEILNAANSGSSISQIMSAFREREGFNLIGKDISNIIQKERQKQLGGMTPLQWLLKELQDNGYNTRFETKDGNILSKLMYLHPQAIQLWKDHPDVLLMDCTYKTNRFNMPILNICGVTGGNKVIQLGLVFLSSEKENDYSWVLQQLKQIMTLEAIRAPLSIVTDRELALMKSLEAHFSDTPHLLCRWHVNMNVLAKSKKYFPKPTKKGNSYVRSPIFVEFLKQWNAVLAATSEETYKQEVAKLEAMAPKDAYIYVERT…	753	#N/A	#N/A	#N/A	#N/A	#N/A	#N/A	IPR018289 (PFAM); IPR052579 (PANTHER); cd07177 (CDD)	#N/A	hypothetical protein K3495_g3010 [Podosphaera aphanis]
aug-contig_110-processed-gene-29.81	MNKQDELATLLNQQLSLCSTENIKCDSSEYHDAKIEQKINYSISQHYHHSAHTPLNSFTSTVEPMNEKFTVNLDLLGRTLSPALCEEKEMGTTRTAFINQVRQSNEAGHQSRDFNGILLMEDCLFTKPQLFGDPQDKIPNELQKKEITTTVSNEDHDMDGDMIVDTIPLNRNNYWEEEPLSNLCSDDDIINGKFKKLAGSEFYIGNFFAGNQGYCYATDPVYNKVG	226	#N/A	#N/A	#N/A	#N/A	#N/A	#N/A	#N/A	#N/A	hypothetical protein Golomagni_05030 [Golovinomyces magnicellulatus]
aug-contig_110-processed-gene-29.86	MSRPEEILPPDLYYNDSEARKYTTSSRIQNIQATMTNRALQLLDLDKPSLILDVGCGSGLSGEILSSIPEPHMWIGMDISPSMLEIALQRDTEGDLMLTDIGQGIPFRAGSFDAAISISAIQWLCNADSSEVSSTGRLSRFFNGLYASLKRGGRAVCQFYPKNDEQRTMISSAAIKAGFGAGILEDDPGTKNTKLYLVLTVGGSTDDEKCKIVGNDITRVVQGMDGVSVVDMRKARKEKSNRDHKKGSKAWIMEKKEKMERKGKIVKHSSKYTGRKRRVAF	281	Methyltransferase involved in Williams-Beuren syndrome	P:GO:0070476; F:GO:0008757; F:GO:0016435; C:GO:0005730	P:rRNA (guanine-N7)-methylation; F:S-adenosylmethionine-dependent methyltransferase activity; F:rRNA (guanine) methyltransferase activity; C:nucleolus	#N/A	#N/A	Methyltransf_11,Methyltransf_25,WBS_methylT	G3DSA:3.40.50.150:FF:000017 (FUNFAM); IPR022238 (PFAM); IPR029063 (G3DSA:3.40.50.GENE3D); IPR013216 (PFAM); IPR039769 (PANTHER); cd02440 (CDD); IPR029063 (SUPERFAMILY)	Q	hypothetical protein Golomagni_00921 [Golovinomyces magnicellulatus]
aug-contig_110-processed-gene-29.95	MGLAAPRKKNKLSLDPNNTRWTNNTQSFGHKILTSQGWKQGDYLGAKNAIHAEYHTVANSSHIRVTLKDDNLGLGAKIGSGVGHGECTGLDAFKNLLGRLNGKNDDQISKEQKARDDIRKAVYNEKRWGSVRFVSAGYLVGDKIQDLIDAEAKKVTVKAQKNNVTTTILEENTCSTRSSPGECEAQKKLLTTKKRKANFIDEADAEISLKLNKKISLEEFTEDTNMSEIQSVTVTITKNKHRNCEENFRSEERKSKHKERKKKKEEEPGTKIGLQRPTLMRGRHAIRSKNIAQKKLASMDLASLNQIFMTKT	312	glycine rich nucleic binding domain	F:GO:0003676	F:nucleic acid binding	K11135,K14457	map00561,map04975	G-patch	IPR000467 (PFAM); IPR050656 (PANTHER); IPR000467 (PROSITE_PROFILES)	A	hypothetical protein Golomagni_00920 [Golovinomyces magnicellulatus]
aug-contig_110-processed-gene-3.224	MHRCGRRHDTATVTLLIYLTLSPIANSSRLIEALISHGVILVVTSNRHPDDLYLNGIQRKSFIPCIDLLKSHLTVINLDSDIDYRKVPRPSSGVYHTTLDKNAVSHAEGWFTYLGDPNQAAAHSEIKRVWGREIIVPRVSGRAVMFTFDELIGRPMSAADYMELTKSYDSFIVTGIQAMTYRERDLARRFITFIDAVYEARSILVLTSAVQLNQLFLSKEACRSKKSKCEKQLSSKNEVQEAETTRDLIDDLGLKMEDLKNSSIFSGDEEKFAFARALSRLSEMESKEWMERKLGTKNKKSYQIKK	306	AFG1-like ATPase	P:GO:0006515; F:GO:0005524; F:GO:0016887; C:GO:0005737; C:GO:0005739	P:protein quality control for misfolded or incompletely synthesized proteins; F:ATP binding; F:ATP hydrolysis activity; C:cytoplasm; C:mitochondrion	#N/A	#N/A	AFG1_ATPase	IPR005654 (NCBIFAM); IPR005654 (PFAM); IPR005654 (PANTHER)	#N/A	hypothetical protein Golomagni_01342 [Golovinomyces magnicellulatus]
aug-contig_110-processed-gene-3.226	MHRSNILSLSEQINAATREAHTSLNRLILHRLPLALPPYASDPSIYVTGLLHFATIYITFEELWTQILTASHDSTSNKSCDFLDICELENHSSFYQNDPKPPKRDVPIFAPEPGACSRIESILRHLHVPGLSRTERLRADIGNLTHLPKHEVDKKIDDVLKNGSMSTFLNHIKKSVKQNPHVLLNYSWILYMALFSGGRFLRASLREAGGLGASFWSQDSPPDFHNYNSKEALETARFCLDVPKLKKNPLGSFHLKSPGKKISQTISGLNFFYFIGDMDGEDLKVEFKRRMKETETLLTKNEKMDVILEAQHIFKYLIHMVWELDALMGSHNLDNEKAQELEKSKLLLGTQDFLSLGQSGIWHKYQAKALEGTWKSRFPGINIKNPISKVVPFGLPFPS…	462	Heme oxygenase	P:GO:0006788; F:GO:0004392	P:heme oxidation; F:heme oxygenase (decyclizing) activity	#N/A	#N/A	Heme_oxygenase	IPR016053 (PFAM); IPR016084 (G3DSA:1.20.910.GENE3D); PIRSR000343-2 (PIRSR); IPR002051 (PANTHER); IPR002051 (CDD); IPR016084 (SUPERFAMILY)	#N/A	hypothetical protein Golomagni_02392 [Golovinomyces magnicellulatus]
aug-contig_110-processed-gene-3.229	MNDSMDLSQESEAPSTESSNQLPPIPPIPSIPNPPLLIASPSPPSNQEPQSKTIESRHILKPVAPTKRPVSERPTQNGKDKLETQNAFLPKELADIIATRQRRERAWHVRLMICTTAISNIESTLTNFNGDIEKEEVEAFKAYLRLAIANFAAVDTSPTPPKVPTHSRPTKSCSYGSGIDKNVVKKVAIATPRIMMSAASTGGKIKEAHILPKTPQSSQNTWATVARNGQKKARVILSNKKQVVSVSQPIVTKEKSQTTRMDNRLFVRIPVEHEWRKLSPAGLREVIVKKLSISPSLIGKIKPVHSGFALSPCNNEAREAILAAANGLFMTGARLDQATNWTPVIIPTVPMSIRKEHAEVEVSSSMLIEEVERVCSIRPAHVKLYGRNKAEAPHRTWMA…	1729	reverse transcriptase	F:GO:0003676; F:GO:0003824; F:GO:0004523	F:nucleic acid binding; F:catalytic activity; F:RNA-DNA hybrid ribonuclease activity	#N/A	#N/A	#N/A	IPR036691 (G3DSA:3.60.10.GENE3D); IPR002156 (PFAM); IPR036397 (G3DSA:3.30.420.GENE3D); IPR000477 (PFAM); IPR005135 (PFAM); PTHR33481 (PANTHER); IPR002156 (PROSITE_PROFILES); IPR000477 (PROSITE_PROFILES); cd01650 (CDD); cd09276 (CDD); IPR012337 (SUPERFAMILY); IPR036691 (SUPERFAMILY); IPR043502 (SUPERFAMILY)	#N/A	hypothetical protein EPUL_003734, partial [Erysiphe pulchra]
aug-contig_110-processed-gene-30.70	MEESLLLDFPNGECAPLPDSTIFSSEAEAFGWAQRQASTGGYAFSNLYKNKSKVTGDIILSCYNCDKGPKTYQNKPTTTSKSKQRDGTGSKKCGCQYKITIKPNESKKWVIIPKKSHNHGRNSSSIAHPAHRIAALQNTLRAEILNAANSGSSISQIMSAFREREGFNLIGKDISNIIQKERQKQLGGMTPLQWLLKELQDNGYNTRFETKDGNILSKLMYLHPQAIQLWKDHPDVLLMDCTYKTNRFNMPILNICGVTGGNKVIQLGLVFLSSEKENDYSWVLQQLKQIMTLEAIRAPLSIVTDRELALMKSLEAHFSDTPHLLCRWHVNMNVLAKSKKYFPKPTKKGNSYVRSPIFVEFLKQWNAVLAATSEETYKQEVAKLEAMAPKDAYIYVERT…	753	#N/A	#N/A	#N/A	#N/A	#N/A	#N/A	IPR018289 (PFAM); IPR052579 (PANTHER); cd07177 (CDD)	#N/A	hypothetical protein K3495_g3010 [Podosphaera aphanis]
aug-contig_110-processed-gene-31.19	MADEQNESAAWPIADAGLAQEILDLIQQASHYRQLKKGANETTKTLNRGIAEIIILAADTAPLAILLHLPLLCEDKNVVYCYVPSKTALGRACGVSRAVIAASITTNEASDLMSQIKSLRDKVERLMI	128	Ribosomal protein L7Ae/L30e/S12e/Gadd45 family	F:GO:0003723; C:GO:0005730	F:RNA binding; C:nucleolus	K12845	map03008,map03040	Ribosomal_L7Ae	IPR002415 (PRINTS); IPR018492 (PRINTS); G3DSA:3.30.1330.30:FF:000002 (FUNFAM); IPR004038 (PFAM); IPR029064 (G3DSA:3.30.1330.GENE3D); IPR050257 (PANTHER); IPR029064 (SUPERFAMILY)	J	hypothetical protein Golomagni_04024 [Golovinomyces magnicellulatus]
aug-contig_110-processed-gene-31.31	MAKRQKIRLASLLPKTGMLSIRNPRSQNPNLGRDALGLYIKSPEKCDTSMVVSYDHEFVVINDKFPKSSVHMLILPRDAKFSRLHPFEAFEHAEFLASVRLQLRKVKEVVVNEIRRRYEIFSKQDAQREILVREGRAVENEIDGRRQPLMGRNWDVEVISGVHARPSMNHLHIHVLSVDRFSDSLKHRKHYNSFATNFFIPLEDFPLPSDDIRRFPEREGYLNSELKCWRCGKNFGNKFTSFKKHLSDEFEEWKRV	256	C2HE / C2H2 / C2HC zinc-binding finger	P:GO:0000012; F:GO:0003697; F:GO:0003725; F:GO:0003824; F:GO:0030983; F:GO:0033699; F:GO:1990165; C:GO:0005634	P:single strand break repair; F:single-stranded DNA binding; F:double-stranded RNA binding; F:catalytic activity; F:mismatched DNA binding; F:DNA 5'-adenosine monophosphate hydrolase activity; F:single-strand break-containing DNA binding; C:nucleus	#N/A	#N/A	DcpS_C,HIT,zf-C2HE	G3DSA:3.30.428.10:FF:000017 (FUNFAM); IPR011146 (PFAM); IPR032566 (PFAM); IPR036265 (G3DSA:3.30.428.GENE3D); PIRSR601310-3 (PIRSR); PIRSR601310-1 (PIRSR); PTHR12486 (PANTHER); IPR036265 (SUPERFAMILY)	#N/A	Aprataxin-like protein [Golovinomyces cichoracearum]
aug-contig_110-processed-gene-31.32	MSHSTIEVKPLRSLQSKCLKLITGAYNSTSNKVLEHEISTLPIELYLKQKKIQYAGLCEKQPVQQIIASAVERVKLSACGRNRVWERHKESDLAEWRRIVGKEDDTRRQKEILKISTFQQRKNHEPKQHLRHRAPADPEIWNAANITTDQKMGRIRMNLKGTPSAIHQNLKRAQSSIAIQIRSEHIGLNAYLHRRKVPGVEDPRCQCGYPSQNAKHMVMVCPQWAQGRGEVLRKAKNRSFEAMMDSPEDVARITQWIQREGWIEQFRLTRAVEAVMKEMGTGER	284	#N/A	#N/A	#N/A	#N/A	#N/A	#N/A	#N/A	#N/A	hypothetical protein K3495_g2113 [Podosphaera aphanis]
aug-contig_110-processed-gene-32.0	MEESLLLDFPNGECAPLPDSTIFSSEAEAFGWAQRQASTGGYAFSNLYKNKSKVTGDIILSCYNCDKGPKTYQNKPTTTSKSKQRDGTGSKKCGCQYKITIKPNESKKWVIIPKKSHNHGRNSSSIAHPAHRIAALQNTLRAEILNAANSGSSISQIMSAFREREGFNLIGKDISNIIQKERQKQLGGMTPLQWLLKELQDNGYNTRFETKDGNILSKLMYLHPQAIQLWKDHPDVLLMDCTYKTNRFNMPILNICGVTGGNKVIQLGLVFLSSEKENDYSWVLQQLKQIMTLEAIRAPLSIVTDRELALMKSLEAHFSDTPHLLCRWHVNMNVLAKSKKYFPKPTKKGNSYVRSPIFVEFLKQWNAVLAATSEETYKQEVAKLEAMAPKDAYIYVERT…	753	#N/A	#N/A	#N/A	#N/A	#N/A	#N/A	IPR018289 (PFAM); IPR052579 (PANTHER); cd07177 (CDD)	#N/A	hypothetical protein K3495_g3010 [Podosphaera aphanis]
aug-contig_110-processed-gene-32.12	MNQNISTTTDFPTLPTTHPPPLISTCPPSTGRGESLAEILLSTTSAAETRTQEAKLLFEKIARILDEAKVNSNLPENLVKSFQEFIADLNTVARSHFERHVLGTTRPPPYANSKEKRSGTNFTVPMNSSAMIAPQLKSTYAAVTEVPSQHQHPLPPKPMNKIVPARPQPKGAEDHRLFVRVSEGHPAQTMSPYAVLLDLNPFLKENLIREIQVIKTGFAICPTSLPARDKLYSRMSEIETYLSTRGDCKVEKPTRHKAYLLSGIPQSYTGFNGSTTVQVKITGDLISEALKSLTNFTPVSVLPPRDANGSEHFSQRNWVVLFPEETTNLSRVLPLFGVQVYTKLLRKKSRTPQCGNCFGWHNERTCTRNSRCRICGSTQHNEKGHTTCDPTRPHQCPPK…	1668	Encoded by	F:GO:0003676; F:GO:0003824; F:GO:0004523	F:nucleic acid binding; F:catalytic activity; F:RNA-DNA hybrid ribonuclease activity	#N/A	#N/A	Exo_endo_phos_2,RNase_H,RVT_1	IPR000477 (PFAM); IPR002156 (PFAM); IPR036691 (G3DSA:3.60.10.GENE3D); IPR005135 (PFAM); IPR036397 (G3DSA:3.30.420.GENE3D); PTHR33481 (PANTHER); IPR000477 (PROSITE_PROFILES); IPR002156 (PROSITE_PROFILES); cd09276 (CDD); cd01650 (CDD); IPR036691 (SUPERFAMILY); IPR043502 (SUPERFAMILY); IPR012337 (SUPERFAMILY)	#N/A	hypothetical protein K3495_g12850, partial [Podosphaera aphanis]
aug-contig_110-processed-gene-32.13	MASAESSDEGEIRDSSEEKANMSLLNVDSAVVDRQDRKRSSSSSSVSSDNDYRSRDKNSRERSRSPWSYRHSYSIKRIREEEEHSDRSRGDPRKFKVHYEDTPHEYQRRSRPQYLDNPSHSILPYDDGDEMYLNKRARTRSRSPYRAPREKKRGYGEYTRKIEKRPDAYSWKHNSHGLRGVIRRKPDQSVSKRGPSPLPTENKSHEAKTTQGLSQNSISKEKMNEKDEQTSAAQAPPEEEILDEAALIEQRRKRREAIKAKYKASTSSVPDQASHIEKNSEPSSADNSSCTQQCNLPNSTDKKIINQDNQIASVEIAARISLTDLPEPSSPSEFAVSKDEATINKERGLGNCDENNGPSAADYDPTLHMREDRQRDDQRCIEDVSAGGIQFKFPEDRDT…	786	Serine/Threonine protein kinases, catalytic domain	P:GO:0006468; P:GO:0018105; P:GO:0018107; P:GO:0045292; F:GO:0004672; F:GO:0004674; F:GO:0005524	P:protein phosphorylation; P:peptidyl-serine phosphorylation; P:peptidyl-threonine phosphorylation; P:mRNA cis splicing, via spliceosome; F:protein kinase activity; F:protein serine/threonine kinase activity; F:ATP binding	#N/A	#N/A	Pkinase	G3DSA:1.10.510.10:FF:000078 (FUNFAM); G3DSA:3.30.200.20 (GENE3D); IPR000719 (PFAM); G3DSA:3.30.200.20 (GENE3D); G3DSA:1.10.510.10 (GENE3D); PIRSR000550-1 (PIRSR); PIRSR000554-1 (PIRSR); PIRSR630616-1 (PIRSR); PIRSR000604-2 (PIRSR); PIRSR037993-1 (PIRSR); PIRSR500948-1 (PIRSR); PIRSR037014-1 (PIRSR); PIRSR500947-50 (PIRSR); PIRSR500951-1 (PIRSR); PIRSR630616-3 (PIRSR); PIRSR000628-1 (PIRSR); PIRSR…	A	hypothetical protein Golomagni_00143 [Golovinomyces magnicellulatus]
aug-contig_110-processed-gene-32.17	MNQNISTKTDFPTLPTTHPPPLISTCPPSTGGGESLAEILLSTTSAAETRTQEAKLLFEKIARILDEAKVNSNLPENLVKPFQEFIADLNTVARSHFERHVLGTTRPPPPYANSKEKRSGTNFTVPMNSSAMIAPQLKSTYAAVTEVPSQHKHPLPPKPMNKIAPARPQTKGAEDHRLFVRVSEGHPAQKMSPYAVLLDLNPFLKENLIREIQVIKTGFAICPTSLPARDKLYSRMSEIETYLSTRGDCKVEKPTRHKAYLLSGIPQSYTGFNGSTTVQVKITGDLISEALKSLTNFTPVSVLPPRDANGSEHFSQRNWVVLFPEETTNLSRVLPLFGVQVYTKLLRKKSRTPQCGNCFGWHNERTCTRNSRCRICGSTQHNEKGHTTCDPTRPHQCPP…	1669	Encoded by	F:GO:0003676; F:GO:0003824; F:GO:0004523	F:nucleic acid binding; F:catalytic activity; F:RNA-DNA hybrid ribonuclease activity	#N/A	#N/A	Exo_endo_phos_2,RNase_H,RVT_1	IPR036397 (G3DSA:3.30.420.GENE3D); IPR005135 (PFAM); IPR036691 (G3DSA:3.60.10.GENE3D); IPR000477 (PFAM); IPR002156 (PFAM); PTHR33481 (PANTHER); IPR000477 (PROSITE_PROFILES); IPR002156 (PROSITE_PROFILES); cd01650 (CDD); cd09276 (CDD); IPR043502 (SUPERFAMILY); IPR036691 (SUPERFAMILY); IPR012337 (SUPERFAMILY)	#N/A	hypothetical protein K3495_g12850, partial [Podosphaera aphanis]
aug-contig_110-processed-gene-33.9	MSPSKVPLVLPKKWNTRNRNKRGHDSDNQVDKSGDNSEHYESSSDESWEWIHEDKQDNTALLDNEPIPKMLPNEDMENDAGELLIERKSTIVGARNREFQIKIGDAISVNCGDPNELYLTPLKDSIDIGTINGPVKLMSVNKFNQMYPNGISKRSKEYNSVFVCRRGCEARGAFYTDEFIWEEIKPNTEQEVDELHERIKAETKSSKRKNASKGSNIREEDHGGVKGKVETPRKKQKFLAVSPRKLKTPSKLVTPSHKRVMVKKPLEFTPLGTRLLDFDQIASSPFQTARCRLHVSSVPLALPCRENEFASVYSHLEAAIIEGTGACIYISGTPGTGKTATVREVVAQLQAAVLADELDSFSFVEINGMKITDPVQSYSLLWEALKGERISPIHALDLL…	733	AAA domain	P:GO:0006270; P:GO:0033314; F:GO:0003688; F:GO:0005524; F:GO:0016887; C:GO:0005664	P:DNA replication initiation; P:mitotic DNA replication checkpoint signaling; F:DNA replication origin binding; F:ATP binding; F:ATP hydrolysis activity; C:nuclear origin of replication recognition complex	K02603	map04110,map04111,map04113	AAA,BAH	G3DSA:3.40.50.300:FF:000199 (FUNFAM); IPR027417 (G3DSA:3.40.50.GENE3D); G3DSA:1.10.8.60 (GENE3D); IPR054425 (PFAM); IPR048867 (PFAM); IPR043151 (G3DSA:2.30.30.GENE3D); IPR003959 (PFAM); IPR050311 (PANTHER); cd00009 (CDD); IPR027417 (SUPERFAMILY); SSF82061 (SUPERFAMILY)	L	Origin recognition complex subunit 1 [Golovinomyces cichoracearum]
aug-contig_110-processed-gene-34.1	MYGKHQDQFSSPAPYSEAIKVPSMIIPSPESRIGTILGETLHLTKVIGTGAYGVVYLAIDSRTNEPFAVKALNKVTSSGEPLQERQRSFQFREIQLHHYVSAHPNVVSMHKIVELPDCTYVVLEYCEDGDLFTNITERGRFVGDDDLIRNAFSQILDAVEHCHRLGIYHRDLKPENILISNNGRNLLLADFGLATQEVTSEDHGCGSTFYMSPECLDPTRNSKYDCVPNDIWSLGVVLLNLTCGRNPWKQASLDDSTYRAFFSNPEFLQTILPISDEMNTIILQIFESNPMKRIDIASLKKVIRNCQKFTGPIKCGDPRTPPPGMGRLIENDEERAPEQLLDNIASADWNFTSEEDNNQSFANFCKESPQISVPIDGTKPEILCVPITEKWSYDDSCEE…	538	Protein tyrosine kinase	P:GO:0006468; P:GO:0010506; P:GO:0018105; F:GO:0004672; F:GO:0004674; F:GO:0005524; C:GO:0005737	P:protein phosphorylation; P:regulation of autophagy; P:peptidyl-serine phosphorylation; F:protein kinase activity; F:protein serine/threonine kinase activity; F:ATP binding; C:cytoplasm	#N/A	#N/A	#N/A	IPR000719 (PFAM); G3DSA:1.10.510.10 (GENE3D); PIRSR037281-2 (PIRSR); PIRSR628788-2 (PIRSR); PIRSR037393-2 (PIRSR); PIRSR600239-51 (PIRSR); PIRSR000550-3 (PIRSR); PIRSR000620-2 (PIRSR); PIRSR000666-1 (PIRSR); PIRSR000628-2 (PIRSR); PIRSR637770-1 (PIRSR); PIRSR000617-2 (PIRSR); PIRSR038172-2 (PIRSR); PIRSR000661-51 (PIRSR); PIRSR630616-1 (PIRSR); PIRSR038189-1 (PIRSR); PIRSR000559-2 (PIRSR); PIRSR0…	#N/A	Negative regulator of sexual conjugation and meiosis [Golovinomyces cichoracearum]
aug-contig_110-processed-gene-34.16	MAFCSDAGHGDELLRRLANISLTAAREPSVELTDRNEKDMGILIMAMRKLREGIVASRRVDDFSIQAFIFSIRLSILIKHMESFHPAIRHLLFSMHPIQPLASTEKQEFIGYLILDLACRQDELAQAYLIRRRYQLQDAKIDAVLRALTHDNYVLFWKVKRTVDGYRAKLMEFAEESLRRQTLKCLGRSYLKIDLVSLERFTQSTWLSLTQDLGVGWQLEDGKVMIRKEKKR	232	#N/A	#N/A	#N/A	#N/A	#N/A	#N/A	PTHR39398 (PANTHER)	#N/A	hypothetical protein GcM3_034025 [Golovinomyces cichoracearum]
aug-contig_110-processed-gene-34.8	MASCSKDKYSVILPTYNERKNISIITWLLNRTFTEQCIDWELIIVDDGSPDGTQVVVNQLIKAYAPHVLLKARAGKLGLGTAYAHGLNFATGNFVIIMDADFSHHPKFISRMIAVQKTLSSNGGYDIVTGTRYAGDGGVYGWDLKRKLVSRGANIFADTLLRPGVSDLTGSFRLYKKSVLQKVIESTESKGYTFQMEMMVRAKAMGYTVSEVPITFVDRLYGDSKLGGDEILEYAKGVLSLWMKV	245	Glycosyl transferase family 2	P:GO:0006488; P:GO:0006506; P:GO:0035269; F:GO:0004582; C:GO:0005789	P:dolichol-linked oligosaccharide biosynthetic process; P:GPI anchor biosynthetic process; P:protein O-linked glycosylation via mannose; F:dolichyl-phosphate beta-D-mannosyltransferase activity; C:endoplasmic reticulum membrane	K00721	map00510,map01100	Glycos_transf_2	G3DSA:3.90.550.10:FF:000036 (FUNFAM); IPR029044 (G3DSA:3.90.550.GENE3D); IPR001173 (PFAM); IPR039528 (PANTHER); IPR039528 (CDD); IPR029044 (SUPERFAMILY)	M	Dolichol-phosphate mannosyltransferase subunit 1 [Golovinomyces cichoracearum]
aug-contig_110-processed-gene-35.9	MTTVTSNMSAHVPAWKKIGLKLKSQQVSHSSETKEVVVEDKFLKRKAAVSNGDDDEEKNFSINSSLERKVRKVKRLKSDSSAEISEKSKSKDTTQNKTTTPPFLNYLREYHESRETWKFKKNHQTNLLQHVLDVKFVPSSHAHLVYAYIRGLKGQVRTRLRDKVLAVKVKDQEDGIAGFPSNMPNQEQRQKEYEAAIANYITTISASDIRNSGHEEQFLLGYCDELMKDRIVKRIRAEMIINELASCSEPDENIQRTEKGIMLVEKQPIDSPVQKNVRKRKQRTTNVRDESSSSSDSDSDSDSDSDSDSDSDSDSDSGSGSGSGSSSDDNKVSSNNSSNSSTKNPNSSDSDSGSGSGSGSDDNKVSSNNSSNSSTKNPNSSDSDSDSDSDSDSDSDSDS…	465	Uncharacterised conserved protein (DUF2373)	#N/A	#N/A	#N/A	#N/A	#N/A	IPR019327 (PFAM); PTHR22306 (PANTHER)	#N/A	hypothetical protein Golomagni_04766 [Golovinomyces magnicellulatus]
aug-contig_110-processed-gene-36.19	MGSPPASVIKKGDVISPVPVKTELEKRNDLFRKSDIIKTENKEPLLPPSRPIQQSTQSSDYFTGSHSHLASEANPFDFSFAGGSNGNTNSGALQTPGGTRLPPVSNLTSPAGILGPGITGAYWGPNSLRSGPVSPAMIGGPQKAADDYFGDEHHIRDLRSGFVTANESALRSGFTPGTESHVRVSITPGGSSSMFPELVPNPPPVYNSITSRAATPSTLEFHRVAINAKKRNQPLQQVNVTSQPQEHMNETEIKSPVSGNFDDANAAASGLFLLAQSRESPQTNNKYTTSSTQLPAHAHPAVKKSEKEEKAIKKSPNLQHQKRTSISTSSRADDSVSENEKKKPQLLERNKRSSPAVASRRKASEPPSKSHSVKKSRSNNGTAQVIEEQPSEDEVENNN…	533	bZIP transcription factor	P:GO:0006355; F:GO:0003700	P:regulation of DNA-templated transcription; F:DNA-binding transcription factor activity	K09051	map04011	Aft1_HRA,Aft1_HRR,Aft1_OSA,bZIP_1	G3DSA:1.20.5.170:FF:000053 (FUNFAM); IPR020956 (PFAM); IPR021756 (PFAM); G3DSA:1.20.5.170 (GENE3D); IPR021755 (PFAM); IPR004827 (PFAM); IPR051027 (PANTHER); IPR004827 (PROSITE_PROFILES); cd14687 (CDD); IPR046347 (SUPERFAMILY)	K	putative bzip transcription factor [Golovinomyces cichoracearum]
aug-contig_110-processed-gene-36.23	MTHTKSATSSCVSDENGASCSGKIQQQRQQHQKIKVKNPVVELDGDEMTRIIWHRIKNKLILPYLDLQIKYFDLALPHRDLTSDQVTIDAANAIRKYSVGIKCATITPDEARVEEFKLKKMWLSPNGTIRNALGGTVFREPIIIPRIPRLVPGWKEPIIIGRHAFGDQYRAKDIVVKGNGTLKMVFIPEESNNEDVEQEIDVFKFTNGGGVAQTQYNTDESISGFAHASFKLALAKTLPLYLSTKNTILKKYDGRFKDIFQEIYTKNYKSDFEEKKIWYEHRLIDDMVAQMMKSSGGYIMALKNYDGDVQSDIVAQGFGSLGLMTSVLITPDGKTFESEAAHGTVTRHFREHQKGKETSTNPIASIFAWTRGLVHRGTLDNTPEVITFAKALEQACIET…	451	Belongs to the isocitrate and isopropylmalate dehydrogenases family	P:GO:0006102; P:GO:0006739; F:GO:0004450; C:GO:0005739	P:isocitrate metabolic process; P:NADP+ metabolic process; F:isocitrate dehydrogenase (NADP+) activity; C:mitochondrion	K00031	map00020,map00480,map00720,map01100,map01110,map01120,map01130,map01200,map01210,map01230,map04146	Iso_dh	G3DSA:3.40.718.10:FF:000002 (FUNFAM); NF006156 (NCBIFAM); IPR004790 (NCBIFAM); IPR024084 (PFAM); IPR004790 (PIRSF); G3DSA:3.40.718.10 (GENE3D); PIRSR604439-2 (PIRSR); PIRSR604439-5 (PIRSR); PIRSR000108-4 (PIRSR); PIRSR604439-3 (PIRSR); PIRSR000108-3 (PIRSR); PIRSR000108-1 (PIRSR); PIRSR000108-2 (PIRSR); IPR004790 (PANTHER); SSF53659 (SUPERFAMILY)	C	Isocitrate dehydrogenase, mitochondrial [Golovinomyces cichoracearum]
aug-contig_110-processed-gene-36.24	MPTPKTKPESSKSQPNSHEDSSEIKRRLIDSRSDSNHDSSNCKDELSETRPAKKRKMLRDEIEVDITAPEPPSKKQLRLLKKGKPLQQKKNIIDSAQSEGSKNKEPELNKRSEHGVWVGNLSYQTSVEQLKKFLTENCEIAESVITRIHMPGAPDTKTLPRNGDEKAGKLILNKGFAYVDFFCKEAVIKAIELSEKLLNGRRLLIKDKQSFEGRPLKARDELSMKNKPRNKKVFLGNLSFDTTEDDLKENFKKCGPIKTLKLATFEDSGKCKGFAWILFEDLNGAENAVRGFVRVLETVKKPKINLSTEDEDSQANSVEVETSRAQRKLWVNKLKGRILRVEFAEDPQIRYKKQYGKDGSKNMSDFRLAAQEHVNNEHVKPFKKVVYRQQYAPRLTGGI…	409	Pfam:RRM_6	F:GO:0003676; F:GO:0003723; C:GO:0005730	F:nucleic acid binding; F:RNA binding; C:nucleolus	#N/A	#N/A	RRM_1	IPR000504 (PFAM); IPR012677 (G3DSA:3.30.70.GENE3D); IPR012677 (G3DSA:3.30.70.GENE3D); PTHR23236 (PANTHER); IPR000504 (PROSITE_PROFILES); IPR000504 (PROSITE_PROFILES); IPR035979 (SUPERFAMILY)	A	Nucleolar protein 13 [Golovinomyces cichoracearum]
aug-contig_110-processed-gene-37.10	MTSNNHTNLLYVPSSPDFNDPFLSPAGYRDRTPSPKPVSMRSLDQDDPGPSEQHLKESLHYDDQIIPSGPFNDALSVNTQAATARVAEAKAIFGTITNVLDNYCVIG	107	reverse transcriptase	#N/A	#N/A	#N/A	#N/A	#N/A	#N/A	#N/A	hypothetical protein GcM1_167020, partial [Golovinomyces cichoracearum]
aug-contig_110-processed-gene-37.7	MEATRLINRLSRPPKHLLSLSATSRRYESSYQRNKSRLNVKPDSSFLLTSDSPQQDHIIFNPPASAPSVFHTPLKFLPPNDKRIKLLAATAERLGLSQVRLPPPMRPREVDIPRGHLNAADIAEIQRLNNEDPNAWTNKKLARKFNCSSEFISVCLRHAGGDPTARKAEMKAKWEYIESRWGPRRKKAREERQKRWAIALRDG	203	Mitochondrial ribosomal protein subunit L20	F:GO:0003735; C:GO:0005762	F:structural constituent of ribosome; C:mitochondrial large ribosomal subunit	#N/A	#N/A	MRP-L20	PF12824 (PFAM); IPR024388 (PANTHER)	J	hypothetical protein Golomagni_05605 [Golovinomyces magnicellulatus]
aug-contig_110-processed-gene-38.12	MEESLLLDFPNGECAPLPDSTIFSSEAEAFGWAQRQASTGGYAFSNLYKNKSKVTGDIILSCYNCDKGPKTYQNKPTTTSKSKQRDGTGSKKCGCQYKITIKPNESKKWVIIPKKSHNHGRNSSSIAHPAHRIAALQNTLRAEILNAANSGSSISQIMSAFREREGFNLIGKDISNIIQKERQKQLGGMTPLQWLLKELQDNGYNTRFETKDGNILSKLMYLHPQAIQLWKDHPDVLLMDCTYKTNRFNMPILNICGVTGGNKVIQLGLVFLSSEKENDYSWVLQQLKQIMTLEAIRAPLSIVTDRELALMKSLEAHFSDTPHLLCRWHVNMNVLAKSKKYFPKPTKKGNSYVRSPIFVEFLKQWNAVLAATSEETYKQEVAKLEAMAPKDAYIYVERT…	753	#N/A	#N/A	#N/A	#N/A	#N/A	#N/A	IPR018289 (PFAM); IPR052579 (PANTHER); cd07177 (CDD)	#N/A	hypothetical protein K3495_g3010 [Podosphaera aphanis]
aug-contig_110-processed-gene-38.14	MCDHPFDEVLNLEQEFYDEGFMQGFSDGKRAGQSEGRTLGLEKGFEKFRESGRLHGKSLIWANQLFLPQKILNHTIEKVVEDCSNNPSINSMTALPLLKPLSKSQRVTKHLKALHALVESETLSIQNTEEAVSDFDDRMKKALVKSKLIESLIEHSNWKSDTNETSPIISESLHDSKIQI	180	Essential protein Yae1, N terminal	#N/A	#N/A	#N/A	#N/A	Yae1_N	IPR019191 (PFAM); IPR052436 (PANTHER)	#N/A	hypothetical protein GcM3_085008 [Golovinomyces cichoracearum]
aug-contig_110-processed-gene-38.15	MPTTPSILSRTPSCTFTHKTPRTNFPKSKSSSHLLTSKASSAGIKSGRGRSKDETRSRSLSHQDRNDSVWLLRAGAVMISSARESKGQDWLASRASSTSIRRLQEDNHKEWERAYFRESENQSKLSSARGSTFEDYGSGFSSPKRSMSINISPTSQIENYTISRRESKIQSLNSPMTMEPDNYFEWKDFSHENKYPQEPEILDTEYAYEDEDQDEAIVKDFSRAYNKGVGGWIEKVLKQRLFTLDDEIEDSETDDESEKADFTDLSKPSLQTFDITTFPVDIDVPPAQDGDVSLWEDAVWFLSVAIKALL	310	Protein of unknown function (DUF3984)	#N/A	#N/A	#N/A	#N/A	DUF3984	IPR025040 (PFAM)	#N/A	hypothetical protein Golomagni_00932 [Golovinomyces magnicellulatus]
aug-contig_110-processed-gene-38.20	MVPPVTPSPHRFVIKKEHPTIANSQFKVTPRFNLSSTPQPNSSSKHHKSASYLSSHDTPLKNCLSKNDSIEIESENSSSPNEGLGGDTFKCRSEDERDYRNSDKLTAKRKRQSSSPGLLDQPTGQQRRANLFRDDSENDPLSNTLPEPTSLLGPNFSPLLTKRPVAARAPRFIISSPSPIPSQFVNETSVFAKPPIFRPPDSTKQTGHQLEPEYDQFSPHRRGEKYVKGGLAAEVRNWLVNIKSSLPGPQMSNKDPWLVRILIEELSGGGKAGMTIARGKRLKSPQENISDISNEVKIILAGEASTISLHKCKSIEKDSIVGIRGPIWEVTIEGEKWDVGVDWKVL	346	#N/A	#N/A	#N/A	#N/A	#N/A	#N/A	#N/A	#N/A	hypothetical protein Golomagni_06063 [Golovinomyces magnicellulatus]
aug-contig_110-processed-gene-38.26	MARQTIILPEEGKRNVLVTSALPYVNNVPHLGNVIGSVLSADVFSRYSKLRDRPTLFICGTDEYGTATETKALETNKTPRQLCDEFHQKHKDIYDWFEIGFDFFGRTTTEQQTIIAQDVFMKLYENEYLEQRTTKQPYCETHKKFLADRFVEGTCPKCADKGARGDQCDKCGSLLDPQELIDPRCKLDGATPVTRDTSHIFLRLDKVQKPLEEWIAASIDTGGWSANSVSITKSWLERGLEGRSITRDLEWGTPVPLPGYENKVLYVWFDACIGYPSITANYTKDWELWWRNPENVKLYQFMGKDNVQFHTIIFPGSQIGTGDKWTKVNTLSVTEYLNYEQGKFSKSRGIGVFGDSAKETGIPPSVWRYYLIANRPEVGDTQFEWKAFVAANNSELLAN…	608	Belongs to the class-I aminoacyl-tRNA synthetase family	P:GO:0006418; P:GO:0006431; F:GO:0000166; F:GO:0004812; F:GO:0004825; F:GO:0005524; C:GO:0005829; C:GO:0017101	P:tRNA aminoacylation for protein translation; P:methionyl-tRNA aminoacylation; F:nucleotide binding; F:aminoacyl-tRNA ligase activity; F:methionine-tRNA ligase activity; F:ATP binding; C:cytosol; C:aminoacyl-tRNA synthetase multienzyme complex	K01874	map00450,map00970	MetRS-N,WHEP-TRS,tRNA-synt_1g	IPR033911 (PRINTS); G3DSA:2.20.28.20:FF:000001 (FUNFAM); G3DSA:1.10.730.10:FF:000037 (FUNFAM); IPR014758 (NCBIFAM); IPR041872 (PFAM); IPR029038 (G3DSA:2.20.28.GENE3D); IPR015413 (PFAM); IPR014729 (G3DSA:3.40.50.GENE3D); G3DSA:1.10.730.10 (GENE3D); IPR023458 (PANTHER); IPR033911 (CDD); IPR041872 (CDD); IPR029038 (SUPERFAMILY); IPR009080 (SUPERFAMILY); SSF52374 (SUPERFAMILY)	J	Methionine--tRNA ligase, cytoplasmic [Golovinomyces cichoracearum]
aug-contig_110-processed-gene-39.135	MAEIRKKLVIVGDGACGKTCLLIVFSKGTFPEVYVPTVFENYVADVEVDGKHVELALWDTAGQEDYDRLRPLSYPDSHIILICFAVDSPDSLDNVQEKWISEVLHFCCGLPIILVGCKKDLRYEQKTIEELHKTSQKPVTPEQGEEIRKKIGASKYLECSAKTNEGVREVFEHATRAALLTKKKKEKRCIIL	192	Belongs to the small GTPase superfamily. Rho family	P:GO:0007264; F:GO:0003924; F:GO:0005525	P:small GTPase-mediated signal transduction; F:GTPase activity; F:GTP binding	K04513,K07975	map04011,map04014,map04015,map04022,map04024,map04062,map04071,map04072,map04144,map04150,map04270,map04310,map04350,map04360,map04510,map04520,map04530,map04611,map04621,map04660,map04670,map04722,map04810,map04921,map04972,map05100,map05130,map05133,map05152,map05200,map05203,map05205,map05206,map05210,map05418	Ras	PR00449 (PRINTS); G3DSA:3.40.50.300:FF:000329 (FUNFAM); IPR027417 (G3DSA:3.40.50.GENE3D); IPR005225 (NCBIFAM); IPR001806 (PFAM); IPR003578 (PANTHER); PS51420 (PROSITE_PROFILES); IPR001806 (PROSITE_PROFILES); PS51419 (PROSITE_PROFILES); cd01870 (CDD); IPR027417 (SUPERFAMILY)	U	GTP-binding protein rhoA [Golovinomyces cichoracearum] RKF73047.1 GTP-binding protein rhoA [Golovinomyces cichoracearum] RKF78344.1 GTP-binding protein rhoA [Golovinomyces cichoracearum] TQS38556.1 hypothetical protein Golomagni_00935 [Golovinomyces magnicellulatus]
aug-contig_110-processed-gene-39.138	MRRLTQSTWGGNFVKSRLLYNALVRSALTYGCAIWGEAGPKGNIPERIVKPLRSLQRKCLKLITGAYNSTSSRVLEHETSTIPIEIYLKQRRIQHAGSSEKQPAQQTLRYALENIKLSACGRNIVRAKNERNDLVEWRKISGIEENTKKQKEMLKIAAFQQWKHAWNNHASKSHLGHRAPADPIKWHATNIKTDEKTNRLRMNHTGTPLAIHQLLTRAQSSIDIQIRSEHIGLNAYLYRRKVPEVDEPRCPCGYPSQNAKHMIMMCPQWTKGRGDVLRKAKNRTFEAMMESPEDIGRITKWIQEEGYVEQFWLTREVEAVAEKRGYV	327	#N/A	#N/A	#N/A	#N/A	#N/A	#N/A	#N/A	#N/A	hypothetical protein K3495_g6322 [Podosphaera aphanis]
aug-contig_110-processed-gene-39.145	MTNSTLRDSSKVILSHGVSLFKWKSSLQAKLAKNGVIGHVFHDFPGIRPISRPTDPTTNIQNTDPDFDAILNIHLKELEVWTLGEIAAKNIIVNRLDPCMCPRTHDHMTAKQLYNSIADTRKETATAPYATALETFLSTKFVSHADDYIDRFQANLQTVNEAADTLHATTGTEYHVTTGQAAAIFVLGTKHVSWLSNWRDLRACTDNNSYAALETMMSTIRVVDGHRAHNPTQPNQVFAVLNDAGGDGPNDDCKRCKHRHKNRECFKQHPELAVGPRGERWLARKALGDRSRRVNTVSGIDTDSDSEVGLNNVVIAATAAAHNTTVAIYDTGASHHFVPCESMFLNLTTRNKPIRFDQAVGHTSLTKQGTARVTIGNLIFDLNDCLFSPQSSCIIISAG…	1448	transposition, RNA-mediated	P:GO:0015074; F:GO:0003676	P:DNA integration; F:nucleic acid binding	#N/A	#N/A	#N/A	IPR036397 (G3DSA:3.30.420.GENE3D); IPR025724 (PFAM); IPR013103 (PFAM); PTHR11439 (PANTHER); IPR001584 (PROSITE_PROFILES); cd09272 (CDD); IPR012337 (SUPERFAMILY)	#N/A	hypothetical protein K3495_g11368 [Podosphaera aphanis]
aug-contig_110-processed-gene-4.11	MEMKNLKTQGLYDQQQPRNLLTVNSKQLQPLSDNYQMPRTPSQDHKQTWEDKVIHHAVDEFQDGIPDRNRLKVIPNTEWHNKYIASDDLGTPYLTCATNPSSPGRSTYSEKDGLRTQENETVEKFRYHKNSLRFIMTILACAFALAGAQIVSLLYLTLGTRIAEDLNSPSLTIWLLSAGIIAMGALAPFVGPVSDLFGRKPILLSGLICAIFGSIICAATPTAAGFIAGQTLLGFGAVTEELMAISIVSEVVPTAKRGIYTAIILIVILPWSPGTLYADFMASSTWRWIGMPLALWHLLILAMVTGFYFPPPRINSQGLTRRQMLKRIDWIGGLLLTLGLLLILIAMNWGGQQYAWSSSHVLSFILVGLALLLTFCFWEIFGAEFPLYPRRILRVPRPF…	660	Fungal trichothecene efflux pump (TRI12)	P:GO:0055085; F:GO:0022857; C:GO:0005886	P:transmembrane transport; F:transmembrane transporter activity; C:plasma membrane	#N/A	#N/A	TRI12	IPR010573 (PFAM); IPR036259 (G3DSA:1.20.1250.GENE3D); PTHR23501 (PANTHER); IPR020846 (PROSITE_PROFILES); IPR036259 (SUPERFAMILY)	U	Efflux pump FUS6 [Golovinomyces cichoracearum]
aug-contig_110-processed-gene-4.12	MMFCGACARCPLHRNALRISRNLLQTTSNTKATASFSSISSRPPRHLLSIADLSTSELSALILNASRHKAAVTSGDILPNIRDSLSGKTVAMMFSKRSTRTRVSTEGAITLLGGHPMFLGSSDIQLGVNESLRDTSRVISSMSAAMIARVGCHSEVLNLAKWSTVPVINALSNDFHPFQTIADLFTIKEAFNLKGNDLSGLKISWIGDSNNVLFDLAIGAMKLGINISVASPMGYTIPEPMRKLIVSHNTSGAKFEETNVPEEAIRGANILVTDTWISMGQEKESEERLKAFSGFQITEDLAKRGGANKDWKFMHCLPRHQDEVDDDVFYGHRSLVFPEAENRLWSAVSVLEGFVVNKGVIA	362	Belongs to the ATCase OTCase family	P:GO:0006520; P:GO:0019240; P:GO:0042450; F:GO:0004585; F:GO:0016597; F:GO:0016743; C:GO:0005739; C:GO:0043231	P:amino acid metabolic process; P:citrulline biosynthetic process; P:L-arginine biosynthetic process via ornithine; F:ornithine carbamoyltransferase activity; F:amino acid binding; F:carboxyl- or carbamoyltransferase activity; C:mitochondrion; C:intracellular membrane-bounded organelle	K00611	map00220,map01100,map01110,map01130,map01230	OTCace,OTCace_N	IPR006130 (PRINTS); IPR002292 (PRINTS); G3DSA:3.40.50.1370:FF:000017 (FUNFAM); G3DSA:3.40.50.1370:FF:000009 (FUNFAM); IPR036901 (G3DSA:3.40.50.GENE3D); IPR006132 (PFAM); NF001986 (NCBIFAM); IPR036901 (G3DSA:3.40.50.GENE3D); IPR006131 (PFAM); IPR002292 (NCBIFAM); PTHR45753 (PANTHER); IPR036901 (SUPERFAMILY)	E	Ornithine carbamoyltransferase, mitochondrial [Golovinomyces cichoracearum]
aug-contig_110-processed-gene-4.18	MCRYGQSVETNSRRRERGSTSTKAEEMTSKKSSRLRRLSRFLPRLNTEPSLSEFQLPPVPSKRPQPQICKIASPRHPPPSPRLKDSPSQSPLQANKLRRHAISSPSASSFTSSEEQSISRNSTLLRRVAPGRMEYQSMPNLLSLPKTQHKDVYRENSTTKLRKSWLPGSRARSARFNTSDSTYDLPAWINAGGARIEYNLTPLLQGEKVLELWNETAETFVHLWPQKSGRLAQMRVPYTVIESSIRLRNLIRDSQCLLEEKKVQLNLENKDVIKNVDPDTISTPPYTPEQSLSGNDSISEADEDPLDGPRQYHLYFPVDLSAFGSPLSNRDIQKLVDIRNLFALLTSQPLVATPLCPTNFKIFLSIAVLLKENYSNEDENSYGNAVDLAFSFCLKEIPQ…	842	Choriogenin Hminor	#N/A	#N/A	#N/A	#N/A	#N/A	PTHR39601 (PANTHER)	#N/A	putative choriogenin hminor [Golovinomyces cichoracearum]
aug-contig_110-processed-gene-40.10	MDQPPNEDHDPVHKLGQPKSLTIDTRLGSLSQTDDTKGISENRWHTLLLQSSSPESCDQALTRTWLERDSSFSHRETLFGSYSRNRGRSGLKSMEPRTSDFDNGSSGASNFTTSFPFISNSLPTHGSSMKSPKSSASTSSDSAESLLGDTNQFLLEFSDSEKISRLMKTESGRMRGEAECHTNGIRIRGLFYIDEAVGSLMYEGNNKEPNLSTMVADLRRLQIKPTKSPVDELKSIKLSNRALGLKFQFLPVEEAEFNLWLAAFLYWQRIRTGDQPKILSMSLLSPRKKGTDPQISRKMDIKPKQAKVGNIIKVAKLLLWDGTASSTTSPTNKTSLKDSSRSSWKQVSCTLQDNGQFKLMNEIDNTPISVIQLVQLSRCSIQLIDRSVLDEEFCIAIFP…	1157	GTPase-activator protein for Ras-like GTPases	P:GO:0043087	P:regulation of GTPase activity	#N/A	#N/A	C2,RasGAP	IPR035892 (G3DSA:2.60.40.GENE3D); IPR008936 (G3DSA:1.10.506.GENE3D); IPR001936 (PFAM); IPR039360 (PANTHER); IPR001936 (PROSITE_PROFILES); cd05137 (CDD); IPR008936 (SUPERFAMILY); IPR035892 (SUPERFAMILY)	T	Inhibitory regulator protein BUD2/CLA2 [Golovinomyces cichoracearum]
aug-contig_110-processed-gene-40.5	MSASTQPSSSASTDPGDQMHPSLLGIAAAMEQYERQTKQRMSAAQSFLQNIDAWAKSQAGTEIAAIVAPLMEKVSHIVTEFAIGNDNTPTPIGKNPHPQMSQLTTSVPRVTKHIENPHHALPLKPQLSTSPWVTVARKAAKLPDPPANLAKRRPDVQTKTAGNEPPKEDKRLFLRIGRDHPWRQLSPVTIKKMVTERAGVAPSAILAMTQVRSGLAMECASDALRETILRVSPSLQNVNVTIDVASDWTSVIVPHVPLYIRTMSGRIEVTSEMVKAECQAVCGVTPIQVRPNYVKIGQYSTSWIVHFKQVPANLKFRLFDESGPAMPFTRRRPIEQCQRCWGFHSTRNCVKGQRCEKCSGTHEKAACTNKLPKCANCAGPHEATNPDCMARPSRQHGQV…	485	EKA-like protein	#N/A	#N/A	#N/A	#N/A	#N/A	#N/A	#N/A	hypothetical protein K3495_g11956 [Podosphaera aphanis]
aug-contig_110-processed-gene-41.18	MKSPRSLLEIKAKTKLSLSTTGPSKNIYAQTSTPGSSYSLRATSPIPYSKTTKQITPKDFSALLNPNLYHPLSNSEIPPPLRNLATQPKTTVSVPELISAGYFREAAIKAAEILTKTGHEISINQIFDLVYKRLACLTLCHQITIAVQEVKALEDLNSTHYRDEKSGQHIVPWELRVLAVRLQGIGFGDVRKSVIGYYDLVSDVRLNIKNLKKERKLLRSSNDPIEKIQSEINLWEKRLSDLGLRVASALIEMEDFEGASRFLSTLQPSPFNPNLNHQKALLWLCLGDVEAALNCAQDDKVLITLAHIADKQFEKAVEGWENLIKTGNPAEEAMWKQNLAVSLIYLGRIDEARKILERLVDEDGYGFHALTFNLSTIYELTTERSRSLKIGLAERLAEI…	424	regulation of kinetochore assembly	F:GO:0005515; C:GO:0005794; C:GO:0030008	F:protein binding; C:Golgi apparatus; C:TRAPP complex	#N/A	#N/A	TPR_19	IPR011990 (G3DSA:1.25.40.GENE3D); PTHR21581 (PANTHER); IPR011990 (SUPERFAMILY)	#N/A	hypothetical protein Golomagni_00394, partial [Golovinomyces magnicellulatus]
aug-contig_110-processed-gene-41.9	MSTSIVPTTDSLHSIYTEDALPCQYNRWQALLAQFRSLYGDSPSFVSRSPGRVNIIGEHIDYSLYGVLPMAITADVLLAVSTSISSASENSYEVKLCNIQPEVFQSHVFKIQNETVEIDPSLHEWSNYFKSGLKGAINALQRKHGDQFKPKNMKILMDGSLPVGGGLSSSAAFVSASALAVLFANGETSIDKTTLTELAIISERAVGVNTGGMDQSASVFSIRGSALHVSFVPALNTEVVNFPKTTPELNFLIAQSFVQSDKHVTGPVCYNLRVVECSMAAAYLNATLCDKGEIKPLTPDSSPLAISLRSFHERYFSKSLLSFKDQLSELVDLTKSILKREEGYTREEIARVLGCTILELNNRFMFKFPVRAERFMLRQRAIHVFSEARRVLDFLYLLE…	520	Galactokinase galactose-binding signature	P:GO:0006012; P:GO:0046835; F:GO:0004335; F:GO:0005524; F:GO:0016301; F:GO:0016773; C:GO:0005737; C:GO:0005829	P:galactose metabolic process; P:carbohydrate phosphorylation; F:galactokinase activity; F:ATP binding; F:kinase activity; F:phosphotransferase activity, alcohol group as acceptor; C:cytoplasm; C:cytosol	K00849	map00052,map00520,map01100	GHMP_kinases_C,GHMP_kinases_N,GalKase_gal_bdg	PR00959 (PRINTS); IPR000705 (PRINTS); G3DSA:1.20.1440.340:FF:000003 (FUNFAM); G3DSA:3.30.230.10:FF:000056 (FUNFAM); IPR006204 (PFAM); IPR013750 (PFAM); G3DSA:1.20.1440.340 (GENE3D); G3DSA:3.30.70.3170 (GENE3D); IPR014721 (G3DSA:3.30.230.GENE3D); IPR019539 (PFAM); IPR000705 (NCBIFAM); IPR006206 (PIRSF); PTHR10457 (PANTHER); IPR020568 (SUPERFAMILY); IPR036554 (SUPERFAMILY)	G	Galactokinase [Golovinomyces cichoracearum]
aug-contig_110-processed-gene-42.105	MLDMFSTLTYQGNMSSIYKPHIASPLSSSPIKYPTSPTATPHTSLPKSKDQCDSIMSSPPSICSRSATSQSPRARYPQNIHKTPSRRIDLPTMTSHSSPLNGKYSERQKRLNPLSQLRNSKNSEEDRKTRRKLFLNRVKEASKDKRWREREGGFSERDGELLRTLWLAEKERRQEQLRREASEREVPFEFEDINESTQGYNEEIAELEDFLQEERRCSSKFSIPPKTSFSLQETNSEAQLLNENDDDDDEYDHIFMELIQQGYSDLDQSAQQAERQEDHDMVDKGYLSIF	290	#N/A	#N/A	#N/A	#N/A	#N/A	#N/A	#N/A	#N/A	hypothetical protein GcM3_024032 [Golovinomyces cichoracearum]
aug-contig_110-processed-gene-42.93	MRSPQGSPLPPLLFMLYISTLFEDGTSNSRFGYVDDISVVSVGKNPCEALEAAQEEEDRITQLSLTHKIQFDASKSELFIIGGGPKKRLDISNFIVQNGEQHIAPSPQIQWLGIWLDSQLKFKQHVQDWSSKAQRISNFLRSMNKVQRGAVNACVVSTSLYGAEAWLLGLTRITTKRDKKVSTGVGWHTKLVDRTILTAIRAALPILRTNPNIVLHCESGILPAKIILQQIQFRSIARIRLFDNYDPLSSRANETPKDAIKRLKLREGQNERVFRVPERYQTLPQT	286	Ribonuclease H protein	#N/A	#N/A	#N/A	#N/A	#N/A	PTHR33481 (PANTHER); IPR000477 (PROSITE_PROFILES)	#N/A	hypothetical protein K3495_g10621 [Podosphaera aphanis]
aug-contig_110-processed-gene-42.94	MPPIRNSSKRKAPPDGYADIEDDLLIFNNKMKDAENESTVNVPRHQVHWPIFQISHQRSRYVYELYYKKKAISKELYEWLLKNGYADKMLIAKWKKTGYEKVHNYTYNLESVLKLL	116	G10 protein	P:GO:0000398; C:GO:0005634; C:GO:0005681	P:mRNA splicing, via spliceosome; C:nucleus; C:spliceosomal complex	K12873	map03040	G10	IPR001748 (PRINTS); IPR001748 (PFAM); IPR001748 (PANTHER)	K	Protein BUD31-like protein [Golovinomyces cichoracearum] RKF56610.1 Protein BUD31-like protein [Golovinomyces cichoracearum] RKF80088.1 Protein BUD31-like protein [Golovinomyces cichoracearum] TQS36256.1 hypothetical protein Golomagni_03299 [Golovinomyces magnicellulatus]
aug-contig_110-processed-gene-43.24	MSEQISLTTNLPGDSTTATEVHDSIKVSVADLCARGRVQYGNKNFESAADLYSRATEIQAGLNGEMNPENAEILFLYGRSLFKLGQSKSDVLGGADGQKKKRKSSPKPSIAATETEDKSKNGDSKFSDSFVSETSIPNNTPDTEKQNLISDAKKPLFQFTGDENFEESEEDEAQTGDDGEETEDDDDDLAAAFDVLDLARILFKKKLELLEGADNKEKLDADLLTIRHNKERLADTHDLLAEISLENERFPSAVTDFRAALAYKQELYTEERSVIAEAHYKLSLALEFASVTSAADDKNEGKEGGSMELDMSLREEAVKEMEAAIKSTDLKLQAKEAELLKMDLPDDIETMQNQVAEVKEMLSELQTRLEELRGPPIDVKSVLFSPLMGERGILSNATT…	463	SHNi-TPR	P:GO:0006335; P:GO:0034080; F:GO:0005515; F:GO:0042393; C:GO:0005654	P:DNA replication-dependent chromatin assembly; P:CENP-A containing chromatin assembly; F:protein binding; F:histone binding; C:nucleoplasm	#N/A	#N/A	SHNi-TPR	IPR011990 (G3DSA:1.25.40.GENE3D); IPR011990 (G3DSA:1.25.40.GENE3D); IPR019544 (PFAM); IPR051730 (PANTHER); IPR011990 (SUPERFAMILY)	BD	NASP-related protein sim3 [Golovinomyces cichoracearum]
aug-contig_110-processed-gene-43.30	MASPRNNQKARTAPIFREKNGLAQKSQIISSSPAFGTPAHSIRPAAPAHTILPIILPPSTLRPVAFRIFTKKHGLTLTSSALQTLATFVGRYCGTEWRESGLAEPVLEEISKNWKNRNGSVIVDGENNDFKDILKYLEASMDGGRIVSREISRRSSFVLEKPLDSHTDQRYLKNSLREDRHENNDLPNIKSSSLDANDQENQENLRDPRIWLKVIDAFGQPRLVYNPSKKHFDRGPHPGLETPQQFYKITPINNLLGRNGTNHLILGLLSISPTETLTINDLSGSIALDLTHAKPIPEDGAWFTPGMIVLVDGTYVEEDINTGTELGGGGGIGGCIGGKFIGFYVGGPPCERRKITLGINLTNEKESGTVAEGEFGWVDFLGVGSERAVGSKMRKVEQK…	735	DNA polymerase alpha/epsilon subunit B	P:GO:0006260; P:GO:0006261; P:GO:0042276; F:GO:0003677; C:GO:0008622	P:DNA replication; P:DNA-templated DNA replication; P:error-prone translesion synthesis; F:DNA binding; C:epsilon DNA polymerase complex	K02325	map00230,map00240,map01100,map03030,map03410,map03420,map05166	DNA_pol_E_B	IPR007185 (PFAM); IPR016266 (PANTHER)	L	hypothetical protein Golomagni_00764, partial [Golovinomyces magnicellulatus]
aug-contig_110-processed-gene-43.31	METSIRHGSPFWRARVQEDNGRAASSTHNKDTGLVVGASYSHADMLKAENSPARLNNTMPKSPSIPVKMQHDTLPINQTYASRSLTRRGSYTDFLSHTNNDWNVEGDSDHVIDFDYDNHEGDEFGLPSMMSMLKKKDITTSKRLVDLGKKESNSKIMNDGQRNSKNIFRRESNSVDIAIERPKLNNQVVKKSEGKILRPQYKEILRDPANSLHLIDHPPIAPDALPKEIDVHSARLTRINKFKKILQATSINLIDLRAAAWSGIPEEVRAMTWQLLLGYLPSSSERRVGTLNRKRKEYLDGVRQAFERGGASSSSTGKARGLDEAVWHQISIDVPRTNPHVELYGYEATHRSLERILYVWAVRHPASGYVQGINDLVTPFWQVFLASYVTDSDVESGMD…	582	Domain in Tre-2, BUB2p, and Cdc16p. Probable Rab-GAPs.	P:GO:0090630; F:GO:0005096; C:GO:0005794	P:activation of GTPase activity; F:GTPase activator activity; C:Golgi apparatus	#N/A	#N/A	RabGAP-TBC	G3DSA:1.10.472.80:FF:000001 (FUNFAM); G3DSA:1.10.8.270:FF:000037 (FUNFAM); G3DSA:1.10.472.80 (GENE3D); IPR000195 (PFAM); G3DSA:1.10.8.270 (GENE3D); PTHR22957 (PANTHER); IPR000195 (PROSITE_PROFILES); IPR035969 (SUPERFAMILY); IPR035969 (SUPERFAMILY)	U	hypothetical protein Golomagni_00762, partial [Golovinomyces magnicellulatus]
aug-contig_110-processed-gene-44.101	MKYQRRLMRRSKKRLPPSQSNRSSPSSLSTPPASPLLIHWDSDCSNFMSKTQSHHSRQLSLKIPTVTFHSPQPPTLKEILTDEAPSPWTRSAFMAYLSQIHCLENLEFTMDAAKYEKHYHAMMSRASPKSRTDSPPVDSESVRKLWLKLLNAYIRPNGPREVNLPSDIRDNLLSLPCTPNSPPDPSELVKAVKITYELMDQSALVPFLNSLTPSRLNGHSNYPWLSQVSIASSAASSEKSASTCTSRRNSQNHLTVDSNLSVNTSHSARQSLNTIRSACRISSFMFGISPPSSNSSEATDRLIDDDATSSYNLVTPPSTPTGGSSGWKKMSAKFCHRKKNRTFTPLHSGIHSNSTSHEKNYDLV	364	Regulator of G protein signalling domain	#N/A	#N/A	#N/A	#N/A	RGS	IPR044926 (G3DSA:1.10.167.GENE3D); IPR016137 (PFAM); PTHR10845 (PANTHER); IPR016137 (PROSITE_PROFILES); cd07440 (CDD); IPR036305 (SUPERFAMILY)	#N/A	putative regulator of g protein signaling domain protein [Golovinomyces cichoracearum]
aug-contig_110-processed-gene-44.103	MASALRNCCYRVACFRLRFIPKRHVLGRVSEFSTSITSHKDPNLDDLFPDLRRSSRLTAEEYAKIESYVKKDLADSETEEVSEEDEDREDDEFTQMFLNEEDSPNSYDPTGEDVTNKFWENVFNNSYNMKKLDAPEKPKRLKQTFMNMGESEPWEQEGMLPDDEDDLTSLGHGELELHRELRHYARLAAWEMPLLYNLRKPFNPPTIHTPLRFRYTTYMGEQHPAENKVVLEFSPSDIPDLTDPQRLKLRKIAGVRWNPERDIVKMSCESYGTQAQNKRYLGDVFASLVREAKDATDTMEDIPLSTKHHKFKKVPQFPQEWIMNETRQKQLEKHRRELTKKDKDLETEGLLVNGVSYVQTMLEEFDKAANEIVPEVTPTGGKGQGKNTAPGSGSHAKTI…	403	Mitochondrial ribosomal subunit protein	P:GO:0032543; F:GO:0003735; C:GO:0005763	P:mitochondrial translation; F:structural constituent of ribosome; C:mitochondrial small ribosomal subunit	#N/A	#N/A	MRP-S28	IPR019349 (PFAM); IPR039848 (PANTHER)	J	putative 37s ribosomal protein [Golovinomyces cichoracearum]
aug-contig_110-processed-gene-44.105	MESPKIAPFEATSIDSIPEAVNRCKVTFRSQITKPLEFRLRQLRQLYWGLTDYSESLVEACKQDLGKPTFETFLTEIDWCKNDILYVTKNLKKWMKDEAAPDISLSNTFVKPRIRKDPLGTVLIIGAYNFPVQLAVGPFIGAIAAGCTGVLKPSELSPATAMVLKTIFEKYLDPNAFIVVNGAISETTALLNEKWDKIFYTGSAVVGTIIAKKASETLTPICLELGGLNPAVITKNADPRIAARRLLWGKLMNAGQVCISQNYILVEKDILPAFVEHLKLTLNEFYPNGQKNSPDYGRIVNQRHFTRIKKMLDETRGKILIGGDTDEADNFIEITVVEVTDTDDSMIVNESFGPLIPILTFDGVDEAIRISNAVHSTPLGFYPFGNKAETDKMLNEVTS…	512	Belongs to the aldehyde dehydrogenase family	P:GO:0006081; F:GO:0004029; F:GO:0016491; F:GO:0016620; C:GO:0005737	P:aldehyde metabolic process; F:aldehyde dehydrogenase (NAD+) activity; F:oxidoreductase activity; F:oxidoreductase activity, acting on the aldehyde or oxo group of donors, NAD or NADP as acceptor; C:cytoplasm	K00128,K00129,K17819	map00010,map00053,map00071,map00280,map00310,map00330,map00340,map00350,map00360,map00380,map00410,map00561,map00620,map00625,map00903,map00906,map00980,map00981,map00982,map01100,map01110,map01120,map01130,map05204	Aldedh	G3DSA:3.40.309.10:FF:000025 (FUNFAM); G3DSA:3.40.605.10:FF:000004 (FUNFAM); IPR012394 (PIRSF); IPR015590 (PFAM); IPR016163 (G3DSA:3.40.309.GENE3D); IPR016162 (G3DSA:3.40.605.GENE3D); PIRSR000197-1 (PIRSR); PIRSR036492-1 (PIRSR); PIRSR617656-1 (PIRSR); PIRSR036489-3 (PIRSR); IPR012394 (PANTHER); cd07135 (CDD); IPR016161 (SUPERFAMILY)	C	Beta-apo-4'-carotenal oxygenase [Golovinomyces cichoracearum]
aug-contig_110-processed-gene-45.113	MSSVIEALHIIDGNRPILTHEFASRPLSANQLLPLYTAYAEPRPNLIFLPNTNPPTLIFSITHSNLTFIITTSREIEPLLVLEFLHRVVDVLEEFIGSPLLAPKIESNYHVVAQLLNEMCDSGCISTTEPNALRDLVEVEGWIDKLLGNISIPGKPGFPTSSNTNATGSLSLRPSTLTSTALPWRRANVRHTSNEIYVDIIETLSVTIAPSGRPIAAFANGSIFVTSKISGVPDLQLILSVPSGKQSIKNVIESPVFHPCVRLSEWTENPGEISFIPPDGKFVLAGYGVDLLPIQNLKIEKSNPGLKLPLNVEVKTGIGPTCSEFEVRLLITKVSSEGNSSTSASAVRGAFTGGQISSGIGKNSATLSDPSLQDLVVTIPLPKDLRNLSEIRASRGETT…	545	adaptor complexes medium subunit family	P:GO:0006886; P:GO:0016192; C:GO:0030131	P:intracellular protein transport; P:vesicle-mediated transport; C:clathrin adaptor complex	K12398	map04142	Adap_comp_sub,Clat_adaptor_s	G3DSA:3.30.450.60 (GENE3D); G3DSA:2.60.40.1170 (GENE3D); IPR001392 (PIRSF); G3DSA:2.60.40.1170 (GENE3D); IPR028565 (PFAM); IPR050431 (PANTHER); IPR028565 (PROSITE_PROFILES); cd14837 (CDD); IPR011012 (SUPERFAMILY); IPR036168 (SUPERFAMILY)	U	hypothetical protein Golomagni_03963 [Golovinomyces magnicellulatus]
aug-contig_110-processed-gene-46.18	MSKNINYITLNILRVANIISLLLIAVTSWIILVMTIKAGTFFFFDGVSHLVMSLISVFLITSEISLFNRYFAKNWPALGPESGFNFLGLSMILLGSGILRNLREEIVKMGEVDNQVNLGSLGAVLWPLVLSSGILSLLLGFFNIIATYVFCDKAQGITGRQIRMHRNSALATKPDSLKVFTMSSGPKCQSSFSTLPYYNPQKERRRSRFRLPLSITKSKEAPSCRDEEQDTSNPSSFGSLNVEKIERPLDRVSPILPELMLPPTPHHPAYSTTSPKYPASSRYSVEIRREGKRMDACDSEIHLHSNERFASVDIYTASFFKLLHDRGHDFHIGGPSGVGKGTLCNLLLSRHPRLFATTISHTTRAPRPGETPGREYYFVNHADFQSLVDRGAFVEHAQF…	515	Guanylate kinase homologues.	P:GO:0006163; F:GO:0004385; C:GO:0005829	P:purine nucleotide metabolic process; F:GMP kinase activity; C:cytosol	K00942	map00230,map01100	#N/A	G3DSA:3.30.63.10:FF:000002 (FUNFAM); G3DSA:3.40.50.300:FF:000776 (FUNFAM); IPR017665 (NCBIFAM); G3DSA:3.30.63.10 (GENE3D); IPR008145 (PFAM); IPR027417 (G3DSA:3.40.50.GENE3D); IPR056019 (PFAM); PTHR23117 (PANTHER); IPR008144 (PROSITE_PROFILES); cd00071 (CDD); IPR027417 (SUPERFAMILY)	#N/A	hypothetical protein GcM3_107004 [Golovinomyces cichoracearum]
aug-contig_110-processed-gene-46.19	MTNTDSLRTVKAIPFLKHLKAHPTDIFSLAVTSKHILSASGSSAIKIYSTDFAGSSLVQTLAGAHKLGCHHITASCNGNRAASVGFGGEVKIWKLINKSDEWIEEKNAEAGVGEEDGIKLDQNKPGEIWAIALSKDGQYLASSTYDGRINVWDLDDDQRKIREFETNGSFGMCIDLSQNGRLTASGHENGTIYVFNNETGRMMYSLPVRAVAFSPGCTRLAAAGDAGVIAIYDVKHGEQVANLTGHSSWIFSIDWSETGEYLISGSSDGKVKVWSIEQRSVVSTYCETGQTLWSVKFIPKKERIERFATAGASRSICFYREASGG	325	WD domain, G-beta repeat	F:GO:0005515; C:GO:0005634	F:protein binding; C:nucleus	K12601,K12602	map03018	Ribosomal_L32p,WD40	IPR015943 (G3DSA:2.130.10.GENE3D); IPR001680 (PFAM); IPR051510 (PANTHER); IPR001680 (PROSITE_PROFILES); PS50294 (PROSITE_PROFILES); IPR001680 (PROSITE_PROFILES); PS50294 (PROSITE_PROFILES); cd00200 (CDD); IPR036322 (SUPERFAMILY)	J	Meiotic recombination protein rec14 [Golovinomyces cichoracearum]
aug-contig_110-processed-gene-46.20	MEESLLLDFPNGECAPLPDSTIFSSEAEAFGWAQRQASTGGYAFSNLYKNKSKVTGDIILSCYNCDKGPKTYQNKPTTTSKSKQRDGTGSKKCGCQYKITIKPNESKKWVIIPKKSHNHGRNSSSIAHPAHRIAALQNTLRAEILNAANSGSSISQIMSAFREREGFNLIGKDISNIIQKERQKQLGGMTPLQWLLKELQDNGYNTRFETKDGNILSKLMYLHPQAIQLWKDHPDVLLMDCTYKTNRFNMPILNICGVTGGNKVIQLGLVFLSSEKENDYSWVLQQLKQIMTLEAIRAPLSIVTDRELALMKSLEAHFSDTPHLLCRWHVNMNVLAKSKKYFPKPTKKGNSYVRSPIFVEFLKQWNAVLAATSEETYKQEVAKLEAMAPKDAYIYVERT…	753	#N/A	#N/A	#N/A	#N/A	#N/A	#N/A	IPR018289 (PFAM); IPR052579 (PANTHER); cd07177 (CDD)	#N/A	hypothetical protein K3495_g3010 [Podosphaera aphanis]
aug-contig_110-processed-gene-46.21	MSSQPLLQSAPGKRIALPTRVEPKVFFANERTFLSWLNFTVILAALAVGMLNFGDRTSFISAVVFIVVAVSGMIYALYTYHWRAKSIRQRGQAGFDDKIGPTVLAAALIVGIVFNFVLRIIETLNQDGV	129	Domain of unknown function (DUF202)	C:GO:0000329; C:GO:0033254	C:fungal-type vacuole membrane; C:vacuolar transporter chaperone complex	#N/A	#N/A	DUF202	IPR003807 (PFAM); IPR051572 (PANTHER)	OU	hypothetical protein Golomagni_04396 [Golovinomyces magnicellulatus]
aug-contig_110-processed-gene-46.22	MANATHSVVENYSGTAIKRKRSLSDETKFNVNYGLLDSKRRKDLTALRSPISPLETKLEGESEIFMDPSIIANTIESQFNLEILLKHNELRLIDQELAKCQIALEQLRRCHLIPYPITLDTPEAKLKVSDGTGPALCQDKLNIPWAPPFGVTDGPYTRHYARWLIPDPSFDGVAWNGASQPRSGEHYTHGRTTRHRSTEGVIKVGKMGLRGVTSQKLHALSSGYPQAKDKVGPCVLKRGDGKTVKLVCLDCHRENFSSTQGFINHCRISHRRDFKSHEEAANASGQPVNNDGADTILGDSKCSVTSNNLVHPLIRNAPTGKEAKDACRALLARVADSKAMLREGRLPGFRSIPKSACPNIQNSNPSTTSSLTPHLSELLQHKGFPGKVDEIVNEVQQKL…	597	zinc finger	#N/A	#N/A	#N/A	#N/A	#N/A	#N/A	#N/A	hypothetical protein GcC1_039018 [Golovinomyces cichoracearum]
aug-contig_110-processed-gene-46.25	MYPSLLSSISLLWIVAAALDTSSSSNTQQLASATECAAQPVLELCLSSTSAIASACTPTDYSCLCQKYTDVLTCFNNCPDDLRRASTLSSQSAYCANASMYSSTQTSVLPSSTFSASATTLTGTYTPSSSISSVTISGSPTMTGTSSSMPGMTSSTTSTSTNPTSTHENSGNTIKSSLIWLIAASFALLA	190	Gpi anchored serine-threonine rich protein	#N/A	#N/A	#N/A	#N/A	#N/A	#N/A	#N/A	putative gpi anchored serine-threonine rich protein [Golovinomyces cichoracearum]
aug-contig_110-processed-gene-46.28	MANAAPAPGRAAPQTVYPRSHVGFDSITSQIERKLLKRGFQFNIICVEPVRSTTEIQTVSHIIEENGVRLRLNIVDTPGYGDQVNNDRCWDPIVKYIKDQHSAYLRKELTAQRERYIQDTRIHCCLFFIQPSGHALKPIDIVVLKKLSDVVNVVPVIAKSDSLTMEEQKAFKERIREEFTFHNLKMFPYDNDEFDEEERTLNSQIKSIIPFAVVGSEKSIIIGGKPVRGRQNRWGVINVEDENHCEFVYLRNFLTRTHLQELIETTSQIHYETFRAKSLLALKESSSAGGHSGSRPISPAADRELSRGSHRMTMNGY	317	Belongs to the TRAFAC class TrmE-Era-EngA-EngB-Septin- like GTPase superfamily. Septin GTPase family	F:GO:0005525	F:GTP binding	K16938	map05100	Septin	G3DSA:3.40.50.300:FF:000260 (FUNFAM); IPR016491 (PIRSF); IPR027417 (G3DSA:3.40.50.GENE3D); IPR030379 (PFAM); PTHR18884 (PANTHER); IPR030379 (PROSITE_PROFILES); IPR016491 (CDD); IPR027417 (SUPERFAMILY)	DTZ	Septin-like protein spn2 [Golovinomyces cichoracearum]
aug-contig_110-processed-gene-46.33	MTKYKSGTPRGEGNPRDEVQNNYPKSAMRQRGDFEEKSLQSRKRLASISDPINNSEPKVKIHITEAKRNESGFSGKSAQVDPSACLPLPKTLSDQFDLKSLNISSASKIHAKVTQALGVLENFPAVMGTKNAVVLLRAKPNACGKMISIVEIVKREIASTMQGKWYQYNVLDHVPEESNTFPNNANENKPISKESNNNDDVVKEIPENSNTPFEKAIFGVSSVKAQPVMSIYLSRVRIEELRKKHG	246	Alba	F:GO:0003676	F:nucleic acid binding	#N/A	#N/A	Alba	IPR002775 (PFAM)	#N/A	hypothetical protein Golomagni_04395 [Golovinomyces magnicellulatus]
aug-contig_110-processed-gene-47.133	MSATHATLGAAADERKARLAKLKSLKRKHSDSEKLKSDSIVSPSTEELDVAKQHLSGRNYDAETRGPKLGFENHPNLAVKTTLEQQASNIERDILKQNEEEQEDRGVDLFKLQPKKPNWDLKRDLDKVLQILNIRTENAIARLVRERIEGAKNSIESKSKSSTNINIPTSENDEEIGIDGIELVERVKLREKADKDEENNSDDGERLIN	209	cwf18 pre-mRNA splicing factor	C:GO:0005684; C:GO:0071014	C:U2-type spliceosomal complex; C:post-mRNA release spliceosomal complex	K12871	map03040	cwf18	IPR013169 (PFAM); IPR013169 (PANTHER)	#N/A	Pre-mRNA-splicing factor cwf18 [Golovinomyces cichoracearum]
aug-contig_110-processed-gene-47.135	MSLEQPRRRAFGSRGTSSSNFGHGGYGSRSNFSRGFHGRGRGRGQRESSAWRGRGRGKLRFEGSKIATTQPKSQAKEESSSEDYPEEVTKLEEKSSSDDEEVESFSTSKSYSRLIQKFASEAPSAKRRKTSHSAHPEHIDDIETPLADADDNGDFQEPEEANESEIENSGESDEDNQRNDKDESDPFSSHFNDSNCLKIKSFTETEWVTKRLVISEQYRAVVTVLKNGSNLYQFRPVADAGELFLKKRLSETFSKQRPNLEILEKNLASFMFNYQDVLFCDRTPLNSEILRHLVCLHSVNHLLKVRDRIIKNNTKLARDEGSSELDLRDQGFTRPKVLFLLPTRESCVRIVKIIVSLCEPEQQENRKRFDDYYMENAENSLEIKPADFCELFGGNNDDL…	736	Utp25, U3 small nucleolar RNA-associated SSU processome protein 25	P:GO:0000462; P:GO:0006364; F:GO:0019843; F:GO:0034511; C:GO:0005730; C:GO:0032040	P:maturation of SSU-rRNA from tricistronic rRNA transcript (SSU-rRNA, 5.8S rRNA, LSU-rRNA); P:rRNA processing; F:rRNA binding; F:U3 snoRNA binding; C:nucleolus; C:small-subunit processome	#N/A	#N/A	UTP25	G3DSA:3.40.50.300:FF:002356 (FUNFAM); IPR053940 (PFAM); IPR027417 (G3DSA:3.40.50.GENE3D); IPR053939 (PFAM); IPR010678 (PANTHER)	K	hypothetical protein Golomagni_01774 [Golovinomyces magnicellulatus]
aug-contig_110-processed-gene-47.136	MLTKEKAGGITLTIGILYLTVKSPKHDRHGQTVALHSQSHLLNGFYQLRNRKFHGNTLNLSRDDISKSFVENLKSQWNEEVEKLAWWINQKDWNEVRYEAEKIIINIIRRPDEQYEATQSHESKSLSKLHEAADKGKAAISNTMTTMKDGARAKVEDIIKATGTLTTDAHKAVLNSIDNPLHREKDLVSSTREKTSSALVSPFSSLPGTIEETLQKRYARSTSKKSVEETLEDRYKPIDKSDLNI	245	Component of the MICOS complex, a large protein complex of the mitochondrial inner membrane that plays crucial roles in the maintenance of crista junctions, inner membrane architecture, and formation of contact sites to the outer membrane	P:GO:0042407; C:GO:0044284; C:GO:0061617	P:cristae formation; C:mitochondrial crista junction; C:MICOS complex	#N/A	#N/A	#N/A	IPR031463 (PFAM)	#N/A	hypothetical protein GcM3_015001 [Golovinomyces cichoracearum]
aug-contig_110-processed-gene-47.137	MSGAVGPADETMSDHQLSPRSSSARQEENNAHRAESPPPDAPIISPIKTSKSQNNFDGRPTGLRRKPSDSYRRSFQSEFDRPELHDYSSRRRLRASTDASQENDFYNFHPDTRERTRPPRAHRNVDGFWERQPTSATKPHFDENVLDLERGQDRLNDNYDRGSSPDSLFDQKQHYDHRNMSRREKAELGLTWAHLMNSSLKNHIVAFLGEFVGTTMFLFFAFAGAQVANIGVNAEAQSPDFDGTPTFDIAVYLYISFIFGFSLLVNVWIFYRISGALFNPAVTLGMVLVGAIPVVRAIFLFIAQILGGIAASAMVLGMFPIPLSVRTSLGPGTSLVQGVFIEAVLTAELVFTIFMLAKEKHRATFLAPIGIGFALFIAHLVGVFFTGSSLNPARSFGPC…	470	Belongs to the MIP aquaporin (TC 1.A.8) family	P:GO:0006833; P:GO:0055085; F:GO:0015250; F:GO:0015267; C:GO:0005886; C:GO:0016020	P:water transport; P:transmembrane transport; F:water channel activity; F:channel activity; C:plasma membrane; C:membrane	#N/A	#N/A	MIP	IPR000425 (PRINTS); G3DSA:1.20.1080.10:FF:000024 (FUNFAM); IPR000425 (PFAM); IPR023271 (G3DSA:1.20.1080.GENE3D); IPR034294 (PANTHER); IPR000425 (CDD); IPR023271 (SUPERFAMILY)	G	Aquaporin-1 [Golovinomyces cichoracearum]
aug-contig_110-processed-gene-47.142	MLTRHSQLRKQWSNPIRIYYLLDSTTLTSWLCFQRHLHVGYPAHEKQAATNLICENSNATLGYKQRQQSTKKLEEIQALERKFHARQLGLSETREFQQSLDLRWRQLTYWLNKVTKYRIQTTGTEDIPIDPSNLKIRISEKDINTILQDITEGVFTSDNQRCYFKDWLWPELMAKLLHSYPNQALDVLEATTAKLIETHCLPRGAIADILHCIIKHYLQNLISKEATEQAGIAIRICHFIFGIPSSLVLPLTNYSSFLLLSKLPPPYLREFYFYVSEKHEELSIWTLMQFGSRLAKFGDVEIAFDAVQKLMMTKCQLTRSNTLSVCTSLLHNTRLNPDSQIKASEIFQYLIASGVEPNVFLYNVILHDTMQNQEPQSAWNFYETMVAKGIEPDAVTYSI…	749	PPR repeat family	F:GO:0005515	F:protein binding	#N/A	#N/A	PPR,PPR_2,PPR_3	IPR002885 (NCBIFAM); IPR011990 (G3DSA:1.25.40.GENE3D); IPR011990 (G3DSA:1.25.40.GENE3D); IPR002885 (PFAM); PTHR47447 (PANTHER); IPR002885 (PROSITE_PROFILES); IPR002885 (PROSITE_PROFILES)	#N/A	hypothetical protein Golomagni_01770 [Golovinomyces magnicellulatus]
aug-contig_110-processed-gene-47.148	MAPNTRSGSSETQPDNDASGLTLADVMKSLNTIIANQTTHFDNTSSLDKRMTALENLVSVNEEVKNAPDTTIPLGNTKNTPPTKFEPGQRDSFTMPGKPTFQINRSRVFVAPDNSPGPRGPNNLLMLTKPQVDRTARESWPLHNLNSAYIQWLWTYWCELISEKDLSKTSLDSRNGNKPFRPGLRPLSRTNDIENLSHLQHIQAALVQEGTFYEIWPQRVQHLFQGDFAEVQSFCITHRPTWPMTVEAILQILHLSNNLRAPIDAFVAFRSGPKPSESTTEFLKRFNKAFQRMPTRERAEREVEYTIEYTLQTFAGMVWDTLLQRNEAYPLYSALSNAWLVAQSQQNYMARLLSRPVDSQLLPSSVDPLCLEAESSTVESSPTPDMRLNDPVASVNAAS…	504	#N/A	F:GO:0003676; F:GO:0008270	F:nucleic acid binding; F:zinc ion binding	#N/A	#N/A	#N/A	IPR001878 (PROSITE_PROFILES); IPR036875 (SUPERFAMILY)	#N/A	unnamed protein product [Blumeria hordei]
aug-contig_110-processed-gene-47.149	MEESLLLDFPNGECAPLPDSTIFSSEAEAFGWAQRQASTGGYAFSNLYKNKSKVTGDIILSCYNCDKGPKTYQNKPTTTSKSKQRDGTGSKKCGCQYKITIKPNESKKWVIIPKKSHNHGRNSSSIAHPAHRIAALQNTLRAEILNAANSGSSISQIMSAFREREGFNLIGKDISNIIQKERQKQLGGMTPLQWLLKELQDNGYNTRFETKDGNILSKLMYLHPQAIQLWKDHPDVLLMDCTYKTNRFNMPILNICGVTGGNKVIQLGLVFLSSEKENDYSWVLQQLKQIMTLEAIRAPLSIVTDRELALMKSLEAHFSDTPHLLCRWHVNMNVLAKSKKYFPKPTKKGNSYVRSPIFVEFLKQWNAVLAATSEETYKQEVAKLEAMAPKDAYIYEERT…	753	#N/A	#N/A	#N/A	#N/A	#N/A	MULE	IPR018289 (PFAM); IPR052579 (PANTHER); cd07177 (CDD)	#N/A	hypothetical protein K3495_g3010 [Podosphaera aphanis]
aug-contig_110-processed-gene-48.10	MEESLLLDFPNGECAPLPDSTIFSSEAEAFGWAQRQASTGGYAFSNLYKNKSKVTGDIILSCYNCDKGPKTYQNKPTTTSKSKQRDGTGSKKCGCQYKITIKPNESKKWVIIPKKSHNHGRNSSSIAHPAHRIAALQNTLRAEILNAANSGSSISQIMSAFREREGFNLIGKDISNIIQKERQKQLGGMTPLQWLLKELQDNGYNTRFETKDGNILSKLMYLHPQAIQLWKDHPDVLLMDCTYKTNRFNMPILNICGVTGGNKVIQLGLVFLSSEKENDYSWVLQQLKQIMTLEAIRAPLSIVTDRELALMKSLEAHFSDTPHLLCRWHVNMNVLAKSKKYFPKPTKKGNSYVRSPIFVEFLKQWNAVLAATSEETYKQEVAKLEAMAPKDAYIYVERT…	753	#N/A	#N/A	#N/A	#N/A	#N/A	#N/A	IPR018289 (PFAM); IPR052579 (PANTHER); cd07177 (CDD)	#N/A	hypothetical protein K3495_g3010 [Podosphaera aphanis]
aug-contig_110-processed-gene-48.15	MAPPVSRRILLPDPPDADNRVSKPKSTIGKPSYNQINLINDKQISPSTNSLEDSAHQDEIFSEESLDVINTGKNFRLASLDLDDPDPKEKSIHESLSYDDLPSLSGPLTNVLVTTTKAASQRATEAEILFRPIVSILDQQCQTKNPNVPVAHIQAHTKLCDELTSVARRHFEAFVRGVPAAPVNLEYQDGKTGTKGKNLQGTNFQPSYAQVLINNDQAVSHQCSSNKNCSSARIDPNRNIDERLFLRLIEDDALRKLSGYALQTYIKKKLGSDSHLLANILQTKSGFALCQSKGNSVTLAEKLASSNILTETMSSPPNTIIEIDRDNWGKVKINPDSKDISAASLNSYILWTIQVYKEMRYRDSELWSMFKEDFEGWGEHLFNLADKRAVHLLRDYLRE…	2044	Encoded by	P:GO:0015074; F:GO:0003676	P:DNA integration; F:nucleic acid binding	#N/A	#N/A	RVT_2,rve	IPR013103 (PFAM); IPR036397 (G3DSA:3.30.420.GENE3D); IPR001584 (PROSITE_PROFILES); IPR012337 (SUPERFAMILY)	L	hypothetical protein K3495_g4456 [Podosphaera aphanis]
aug-contig_110-processed-gene-48.21	MEESLLLDFPNGECAPLPDSTIFSSEAEAFGWAQRQASTGGYAFSNLYKNKSKVTGDIILSCYNCDKGPKTYQNKPTTTSKSKQRDGTGSKKCGCQYKITIKPNESKKWVIIPKKSHNHGRNSSSIAHPAHRIAALQNTLRAEILNAANSGSSISQIMSAFREREGFNLIGKDISNIIQKERQKQLGGMTPLQWLLKELQDNGYNTRFETKDGNILSKLMYLHPQAIQLWKDHPDVLLMDCTYKTNRFNMPILNICGVTGGNKVIQLGLVFLSSEKENDYSWVLQQLKQIMTLEAIRAPLSIVTDRELALMKSLEAHFSDTPHLLCRWHVNMNVLAKSKKYFPKPTKKGNSYVRSPIFVEFLKQWNAVLAATSEETYKQEVAKLEAMAPKDAYIYVERT…	753	#N/A	#N/A	#N/A	#N/A	#N/A	#N/A	IPR018289 (PFAM); IPR052579 (PANTHER); cd07177 (CDD)	#N/A	hypothetical protein K3495_g3010 [Podosphaera aphanis]
aug-contig_110-processed-gene-48.25	MSLSSYLASKYLNAEPTSTNSKKRNRKGKKSASSGLTIADDDVLGWSCQLKNNEPYHTDEPLTVASGSAELKRAKKNTWKKIGQSASQSKSSDADEAEKIIAQAAAENSAAQQQGEQEPVFLEGIVKMENGTHAGLQSASEIAKQFEKRRQEEKAAWKEEDSSRGPNENKETVYRDATGRRIDLVMRRQEAQREAKVKMAKEREDREAQGGDFQRAEKEKRREQLDEARFLPLTRSIEDEEMNKELKMKERWNDPASRFMAPKEGGKSSSGMPLYVGAAAPNRYGIRPGHRWDGVDRGNGWEAERFKALNNSARNKELSYTWQMDV	326	Pre-mRNA-splicing factor of RES complex	P:GO:0000398; F:GO:0003723; C:GO:0005684; C:GO:0070274	P:mRNA splicing, via spliceosome; F:RNA binding; C:U2-type spliceosomal complex; C:RES complex	#N/A	#N/A	Bud13	IPR018609 (PFAM); IPR051112 (PANTHER)	#N/A	Pre-mRNA-splicing factor cwc26 [Golovinomyces cichoracearum]
aug-contig_110-processed-gene-49.112	MTFLSKKIVLRLSLTSANRYYHIGTASSVHKAIRRGLVKSRGLAFRGKTKPDPDDPREKYKRKHTLPEFNQSPRGYFKRNHDDGDSNFRGAKEKEKPSYGRNDSRYLLRGRGANRPASIGEAPNLWGDNNTITKSLRETMKNEMDWEKGPEDSESRDSDNISHSAPKPYQSSRKPYESSRKPYESSRKPYESSRTTYQSNRTPYESSRKPYESSRKPYESSRTPYESSRTSYESSRTPYESSRTPYESSRTSYESSRTPYESSRTPYESSRTPYESSRKPYESSRTTYESNKTPYESSRKPYESSRTTYESNRMPYESNRKPYESSRTTYESNRTPYESNRKPYESRPTSSFPTQKRNYDPLYLRDGPDESLEEGLQKTPTLNRKARRALIFGKKPDKK…	858	RNA 2'-O ribose methyltransferase substrate binding	P:GO:0000154; P:GO:0006396; P:GO:0031167; F:GO:0003723; F:GO:0008173; F:GO:0016435; C:GO:0005739	P:rRNA modification; P:RNA processing; P:rRNA methylation; F:RNA binding; F:RNA methyltransferase activity; F:rRNA (guanine) methyltransferase activity; C:mitochondrion	#N/A	#N/A	#N/A	G3DSA:3.30.1330.30:FF:000035 (FUNFAM); IPR001537 (PFAM); IPR029026 (G3DSA:3.40.1280.GENE3D); IPR029064 (G3DSA:3.30.1330.GENE3D); PIRSR029256-1 (PIRSR); IPR047182 (PANTHER); IPR047261 (CDD); IPR029028 (SUPERFAMILY); IPR029064 (SUPERFAMILY)	#N/A	hypothetical protein Golomagni_02441 [Golovinomyces magnicellulatus]
aug-contig_110-processed-gene-49.115	MASPENSANQKSPNSPQSPRAAKEKLLSLKMEIDHQKKELLGIIEGTTVAFRKKGPQVLLLEHWNKEAILNDDSSSAAITSFAMAFVADWDSIPEVYSPSAVYDELIDYFGHWTKAMFEKIASPYKQTFGEAFKRRGFKKDRLSVSKWIIKIRDDENFIAPGDEHKTLPQPSLLTPVHQPTFPSHLNRSQQSSSHHEQSQPPIQRFQPPLSMQADTYRQIETAEHNHRTTTTMQSAQHNFPSFKNHRSQWETHENTAHRQTQQPPVQSTELHNMIVYSWDDYADLPPREIPTSPVSANLQAQFIKIWRQTDNFTGDPYDLLDDKTRHFLSVCDSISVTPNQFAPLFRLILNGKSQQFFLTIIGRKESFRGIYDKLKRHFDTEKNHHQYYADWTSSIFTD…	1577	Encoded by	#N/A	#N/A	#N/A	#N/A	RVT_2	#N/A	L	DUF1421 domain containing protein [Pyrenophora teres f. teres]
aug-contig_110-processed-gene-5.163	MPMNLRKIIPTYSPLQYVYNSPRRLHQSQWRNLLTVAIETSCDDTSVAVLEKRSKNSAKLHFNSKITSDNRSYGGIHPINAHESHQKNLASLLHNAMEQLPIYEAAMNDQKKSMVVGDKILRKPDFVTVTRGPGMRANLITGIDTAKGLAVAWQVPLVGVNHIQAHALTPRLVSSINISDTAIDIGEEPSPKFPFLSLLVSGGHTILVHSRSIWDHEILAETSDIALGDMLDKSARAILPTAHISSSSDVVYGRLLEEFVFPSPSLEHKYTPLKASLNARDGTEDGFQWKITPPFLNPGPGGAQKHCKELSFSGIGGKARSIMQNFPDMSVNERRCLGKTVMTVAFEHLGSRVLFALKDAELKHIKTLVVSGGVASNKFLRTVLRDLLDSRGFQSIHLD…	461	Required for the formation of a threonylcarbamoyl group on adenosine at position 37 (t(6)A37) in mitochondrial tRNAs that read codons beginning with adenine. Probably involved in the transfer of the threonylcarbamoyl moiety of threonylcarbamoyl-AMP (TC-AMP) to the N6 group of A37. Involved in mitochondrial genome maintenance	P:GO:0002949; P:GO:0072670; C:GO:0005739	P:tRNA threonylcarbamoyladenosine modification; P:mitochondrial tRNA threonylcarbamoyladenosine modification; C:mitochondrion	#N/A	#N/A	Peptidase_M22	IPR017861 (PRINTS); G3DSA:3.30.420.40 (GENE3D); IPR000905 (PFAM); G3DSA:3.30.420.40 (GENE3D); IPR000905 (PANTHER); IPR022450 (HAMAP); IPR043129 (SUPERFAMILY); IPR043129 (SUPERFAMILY)	H	tRNA N6-adenosine threonylcarbamoyltransferase, mitochondrial [Golovinomyces cichoracearum]
aug-contig_110-processed-gene-50.164	MRALYLQSGLPLKLWPLILTASIDCLNITPNKIAPKSPYYAVYKKFPIIQNLHPFGCRAFWLDPDYNKLKSKAKEGIYVGTEFIGGHIILNTKTHRTVVRRDVCFHENSFPLKSNILAIHNIDRQNINKALTGNRADQWNKAMDNEISNMTQKGVWSLVPKSEAKGKIMTGKWILKEKPDGELKARWCARGFSEQFAGDTYADVLPPTTLRMLLAYAATHKLIIRHVDITAAFLHAPIDQPIFIEQPHNREHPGDLVCKLQKAIYGLRTALKLWQLKLRQVLSDLGFKPLKNDANVFRKGKTIISTYVDDFMILSTSLAHIDKTVIDLANFFKFKDLGHMTNFLGINVKNEPDGNRINKTKSRLSVVIWGWLYVEEQTHQLLTKI	385	Integrase core domain	#N/A	#N/A	#N/A	#N/A	#N/A	IPR013103 (PFAM); IPR043502 (SUPERFAMILY)	#N/A	hypothetical protein K3495_g14889, partial [Podosphaera aphanis]
aug-contig_110-processed-gene-50.169	MKTPHTSAQRQDPTSLKLDRTSVKKTGSSSIKPFESTPPISLKKSRTPKTENLISKRSSITSEFATKKKQKKEDKSPGLKTKTQTTLLQSNKSHSNISKEKKKVEEEEEEEEEVVEDQTESILTGFQSDSDGDVIIAEDGTTSKQSHHFNKDKLGVLKSGALEEVNKNTPDKPGVVYIGRIPHGFYEHEMKDYFSQFGPIRQIRLSRNKKTGASKHHAWIKFESYVVAEIVAKSMDNYLMFGHLLKVKLISDDKVPENLFKGANKRFKKVPWNKIEGRNLKQPLPQEEWQRRIIKEQKRRLDKSLKLKELGYVFESPKITSVDQISSDSISNSGKDDTCVNEASP	345	RNA recognition motif. (a.k.a. RRM, RBD, or RNP domain)	F:GO:0003676; F:GO:0003723	F:nucleic acid binding; F:RNA binding	#N/A	#N/A	#N/A	IPR000504 (PFAM); IPR012677 (G3DSA:3.30.70.GENE3D); PTHR46754 (PANTHER); IPR000504 (PROSITE_PROFILES); cd12307 (CDD); IPR035979 (SUPERFAMILY)	#N/A	putative RNA-binding protein [Golovinomyces cichoracearum]
aug-contig_110-processed-gene-50.171	MELLIFITFCLKLSWTVLSTSEAVDRTLSKLNPDLDQSSVEAADITQNGVHIPQDGAIVIWVNIGGDHNPKNINPPMPMKSYGMTHNVVVGGKKGLIFEPEQIQASVGDMVIFQFMSKNHSVTQSSFDKPCEQMDNGMDSGFIPNPDDAIYPAPQVAMQVTETKPLWFYCKQSTHCGKGMTFSINPGPMGSGKTHEDFKAKAMMSLSGKDSPPPYKDSPPPYKDMPKDMPKDMPKDMPKDMPKDMPKDMPKDESPPKAVLPPPKDAPPKMVKGSGESGGTCSCSCFCGVSSFPSMGSQGIGSFGGLPGALPMSAMRK	317	Serine-threonine rich protein	#N/A	#N/A	#N/A	#N/A	#N/A	IPR008972 (G3DSA:2.60.40.GENE3D); PIRSR602387-1 (PIRSR); IPR052953 (PANTHER); cd00920 (CDD); IPR008972 (SUPERFAMILY)	#N/A	putative serine-threonine rich [Golovinomyces cichoracearum]
aug-contig_110-processed-gene-51.124	MASSNNRVILRDGVSFTSWRADLQAELSSVDVLGHVFHNTRGIDPEIEPTEPTQVKGEDPEKLSQRMKEYKANLREWIKGEYKAQNLIIQRLEDSKRPQDYHRYTAKQLYEMVARANEVTNLLPHSEAFDAFVATKFTTTADEYVTRFLRNLQNVNNAADALTLQTTNNSYKFSEELAAVYFLKGTKHVKWLNVWRETKAVDVSQYAPLRHMIATLRATAGTRNNATEGYYNDDEESAVNPVAAVAKNTRNKNRIRCKNCRRIHDSKDCPKQNEDDMAQDSDDLCTLCRHEHANKDCYKQHPQRAPKRWLNQEASKGHHYGKAAISLSQNFDTSDENPDDDEDCFYLKAKK	351	#N/A	#N/A	#N/A	#N/A	#N/A	#N/A	#N/A	#N/A	hypothetical protein K3495_g2266 [Podosphaera aphanis]
aug-contig_110-processed-gene-52.16	MPQTIKVCPYKDYLTPALHLFWLWFPLGKTGLRAGLLFIPALCIFLLRVAQLHVGYRTSVSGWDTFKSHAFRFQTIQTATWYCISAYLFSEIYMWSASAEAGLRRIKAIPRTNRSTLNESPIYLICFFFFLAILQTGAHLFFDYDRIDISVSKLKVTSATKTGEGTSALQKLKARIPSLVLVFAFWELFYISHNLELYRKSIFDDIDRVGGSSWSQIRDACLDVINDILTRIDNYESPFISVANISETIPSLPRLSGPLKEGLDLPGDIFNTVSPPSSPVHGVARAVGNFAKSRGHSSPTGLSPKAKKLIQTAENIILTEKQKQAITKSSFSAIFKRWALIFLQSHLGWPFRQEYRRVLATIVLGTPYGEVGLIVNAIESLARLAVCSLNEDQFGNVQR…	491	Nuclear envelope protein	P:GO:0006999; P:GO:0070631; F:GO:0030674; F:GO:0106166; C:GO:0005816; C:GO:0070762	P:nuclear pore organization; P:spindle pole body localization; F:protein-macromolecule adaptor activity; F:spindle pole body-nuclear membrane anchor activity; C:spindle pole body; C:nuclear pore transmembrane ring	K14315	map03013	Ndc1_Nup	IPR019049 (PFAM); IPR019049 (PANTHER)	#N/A	hypothetical protein Golomagni_02059 [Golovinomyces magnicellulatus]
aug-contig_110-processed-gene-52.21	MKAVHFGAGNIGRGFIAELLFISGYEIVFCDVTDSLVDQLNEIKSYKVIQVGPEGSHETSIKNYRAINNKTDSDAVVEEIKNADLVTCSVGPGVLKFIAPVIAKGIDQRTNDKLPVAVIACENAIGATDILANHIKDSKNTNPERLVDLYERARFANSAIDRIVPAQDVNAGLDVKLEQFYEWIIERTPFEEDHIPSIKGVEWVDDIMPYIERKLFTVNTGHAAAAYYGYFHKKKTVWNALQNDQIREEVEKGLAETSSLITSKHFFNEEEQQKYVAKIIKRISNPYLEDTVERVGRAPLRKLSRRERFIGPAVELAEQGKSFDALLNAIEMAFRFNDVQGDLESLELGRILATRSPEKVVKDYTLNYAPFTSNPVDSPSPPLLSTPPTPHPPDAASSV…	892	Mannitol dehydrogenase Rossmann domain	P:GO:0019592; P:GO:0019594; F:GO:0003824; F:GO:0008926; F:GO:0016491; C:GO:0005829	P:mannitol catabolic process; P:mannitol metabolic process; F:catalytic activity; F:mannitol-1-phosphate 5-dehydrogenase activity; F:oxidoreductase activity; C:cytosol	K00009	map00051	#N/A	IPR000669 (PRINTS); NF002652 (NCBIFAM); IPR013328 (G3DSA:1.10.1040.GENE3D); G3DSA:3.40.50.720 (GENE3D); IPR013118 (PFAM); IPR013131 (PFAM); PTHR30524 (PANTHER); IPR023028 (HAMAP); IPR036291 (SUPERFAMILY); IPR008927 (SUPERFAMILY)	#N/A	Mannitol-1-phosphate 5-dehydrogenase [Golovinomyces cichoracearum]
aug-contig_110-processed-gene-53.16	MAPNGIKSTPHKTPLEDCLAFNKEGKGKGFDVGNPESCTEEIIIAYILDAITTYEELDFHDEDLWEVFREDFQGWTIEIFNKADKKATRILRDHLRENGVWVRKKQAFPIVRALTDLLLEEKKHAWTKEETEMQSQSLKPFKSRHNTNKSLPTGNLANPGDIYRLNPPVTFPEMSEPLQRSPNHPIKSMLQPASITSSNLIRHQLQLRLKTKPD	214	ADO33890 polyprotein Pyrenophora tritici-repentis	#N/A	#N/A	#N/A	#N/A	#N/A	#N/A	#N/A	hypothetical protein GcC1_179012 [Golovinomyces cichoracearum]
aug-contig_110-processed-gene-53.21	MEESLLLDFPNGECAPLPDSTIFSSEAEAFGWAQRQASTGGYAFSNLYKNKSKVTGDIILSCYNCDKGPKTYQNKPTTTSKSKQRDGTGSKKCGCQYKITIKPNESKKWVIIPKKSHNHGRNSSSIAHPAHRIAALQNTLRAEILNAANSGSSISQIMSAFREREGFNLIGKDISNIIQKERQKQLGGMTPLQWLLKELQDNGYNTRFETKDGNILSKLMYLHPQAIQLWKDHPDVLLMDCTYKTNRFNMPILNICGVTGGNKVIQLGLVFLSSEKENDYSWVLQQLKQIMTLEAIRAPLSIVTDRELALMKSLEAHFSDTPHLLCRWHVNMNVLAKSKKYFPKPTKKGNSYVRSPIFVEFLKQWNAVLAATSEETYKQEVAKLEAMAPKDAYIYVERT…	753	#N/A	#N/A	#N/A	#N/A	#N/A	#N/A	IPR018289 (PFAM); IPR052579 (PANTHER); cd07177 (CDD)	#N/A	hypothetical protein K3495_g3010 [Podosphaera aphanis]
aug-contig_110-processed-gene-53.7	MYGQLPPTQRLIIAITGIPGSGKTTLATAITTRINQLYPLNPDKLAICIPMDGFHFTRAQLDTFPDPEIAHARRGAAFTFNTESISLFLHALRQPLSPRTKTLFAPSFSHILKDPVPDDIAISSATRIVIFEGNYLAFDMDPWRGIASLFDERWFLKVAFDIAEKRLIVRHLASGIVESEQDARTRVHENDLINGKEIVEYQYQINEVVVSKEDEKLREELEVEA	225	phosphoribulokinase uridine kinase	F:GO:0005524; F:GO:0016301	F:ATP binding; F:kinase activity	#N/A	#N/A	PRK	IPR027417 (G3DSA:3.40.50.GENE3D); IPR006083 (PFAM); PTHR10285 (PANTHER); IPR027417 (SUPERFAMILY)	FH	putative uridine kinase [Golovinomyces cichoracearum]
aug-contig_110-processed-gene-54.145	MSVAYSCQLSLLSEFKNSSSTRSWVSVPNPNSYPLIATATSDKTARIYSLKDFTLHSVLEGGHSRSVRSIAWKPAKKNIDPITLVTGSFDATMGIWRYKKNCEDEPLEKQLSVSKNENCIGLETEITHMREKAVASKSIENEKIKDGDDWDFAIVLEGHDAEIKHVAYSPSGQFLASCSRDKSIWIWEEIGEEGDDEFETVAVLQDHTADVKCISWRRDDGMGELLASAGYDDSIRFWRDSDGEGEWECVAILEAHTGTVWALEWEPDISISKFQSEVLGQEEKCIPRLMSASADLTIRLWSKVSAPPLSNRPSYYDSFIPSTMRPGPVMETWEVSASLPQVHKLPIYSISWSEKSGRVLSAGSDGKIVLYEECLTGRQAVGVNIEREWTVIGIFGSSH…	450	Essential component of the cytosolic iron-sulfur (Fe S) protein assembly machinery. Required for the maturation of extramitochondrial Fe S proteins	P:GO:0016226; F:GO:0005515; C:GO:0097361	P:iron-sulfur cluster assembly; F:protein binding; C:cytosolic [4Fe-4S] assembly targeting complex	#N/A	#N/A	WD40	IPR001680 (PFAM); IPR015943 (G3DSA:2.130.10.GENE3D); PTHR19920 (PANTHER); PS50294 (PROSITE_PROFILES); PS50294 (PROSITE_PROFILES); IPR001680 (PROSITE_PROFILES); IPR001680 (PROSITE_PROFILES); IPR028608 (HAMAP); IPR001680 (PROSITE_PROFILES); IPR036322 (SUPERFAMILY)	#N/A	putative cytosolic iron-sulfur protein assembly protein 1 [Golovinomyces cichoracearum]
aug-contig_110-processed-gene-54.154	MSQPENLAGSIVPRTFKSGYVILSYFISYVGSWTTLELISRRTSMYGISNWLILAAASVSMGGIATWCMHYIGNQAIVLANGKLDAQIKYSLGFTSLSFFIAILMSFIAFVTVGSDVSSPIRVVLGGILNSFGIFGMHYLGQAGISNYECSYKVYWIISAVILSFIACVTGLSQFFLFRLSWESSWWKRATCAAIISAGISAIHWLSSIGTLYRLQEASLKPRDRYFQIFTIVVISVLSTLACLILLGLAITAQRRKNKSIKTAQQLVLAIATFNYEGKILVNPTGSLPVKKITDAWLEQANQKRHRSPKSNMLMNDEGMPIKDYSQVFEELFCTTCASISAELGQPLENMGILFDEIINTEQIKKGKRRIEGFEANISSSTIDLENEASALCGTGKGK…	735	Bacterial signalling protein N terminal repeat	#N/A	#N/A	#N/A	#N/A	MHYT	IPR005330 (PFAM); PTHR35152 (PANTHER); IPR005330 (PROSITE_PROFILES)	T	Signaling protein YkoW [Golovinomyces cichoracearum]
aug-contig_110-processed-gene-55.6	MNNTSTKVKGADHNFAPSKTQVLQENPNLDLIFEEISKNSVIVPPPRIAARFYRPTINRRKSSAASSRRNSISSVHSYQSNTCNRETQSSFFAQHQRRNNIIEDRKARLADRAAHVEKVRSRAAFFKAAPRSTTNSEERALAAQQAREKNLAEIVASCAEEVRRAKEIAETMKEKREADGKRLRKDMEERLAEAEKRREKNLRRCSSIKRGRSISNSFKTLTSQENETTNIAASRIQRQWRAYQRKKVVKEFSTLGLSIERVNQESFDYVAGLLEQVNVLKTTARLLRACGLKYTEDRSVSEMTNVKAFLSAYLITGHPKQTLSLKIETKDFQNKEAYPLIKDDLENIQVQDLVNKARNLLINFENTIMQFNTLNQNLPSLSQQNSLSQNYASFFDAFI…	982	T-complex protein 11	P:GO:0007165; P:GO:0010737	P:signal transduction; P:obsolete protein kinase A signaling	#N/A	#N/A	Tcp11	IPR008862 (PFAM); IPR008862 (PANTHER)	T	putative iq calmodulin-binding motif domain protein [Golovinomyces cichoracearum]
aug-contig_110-processed-gene-56.139	MSFSSLMHDLNLKNVPNNACQQRRLAQYSSSSSSLLEDETSTTFRTRSYASTSATSVSISGHISSQLHGGYSHPLARSWQAERQLTKSMLILPIFITDNEDEETIIQSLPGHCRRGLKKIIPFISPLVLKGLRSVIIFGVPLAPGTKDTLGTAADDPKGPVISAIRLLRQCFPELFIIADVCLCEYTSHGHCGILREDGSLNNDLSVDRVSDVALAYAHAGANCVAPSDMNDGRIRAIKLKLIEDGISHRVVLMSYAAKFSGCLYGPFRDAAGSVPSFGDRKCYQLPPGGRGLARRAIERDISEGADIIMVKPASHYLDIISDAKDIGKNMPVAAYQVSGEYAMIHAAAKAGVFDLKTMAFESTEGLAYFCGYFALPAAAVCTDPVRGLERRQTSEALV	399	Belongs to the ALAD family	P:GO:0006783; P:GO:0033014; F:GO:0004655; F:GO:0008270; F:GO:0046872; C:GO:0005829	P:heme biosynthetic process; P:tetrapyrrole biosynthetic process; F:porphobilinogen synthase activity; F:zinc ion binding; F:metal ion binding; C:cytosol	K01698	map00860,map01100,map01110,map01120	ALAD	IPR001731 (PRINTS); G3DSA:3.20.20.70:FF:000048 (FUNFAM); IPR013785 (G3DSA:3.20.20.GENE3D); IPR001731 (PFAM); NF006762 (NCBIFAM); PIRSR001415-3 (PIRSR); PIRSR001415-4 (PIRSR); PIRSR001415-1 (PIRSR); IPR001731 (PANTHER); SSF51569 (SUPERFAMILY)	H	Delta-aminolevulinic acid dehydratase [Golovinomyces cichoracearum]
aug-contig_110-processed-gene-56.145	MALRSTVSLTSALRHLTHKPLIIFTRAKSTASSPSSLAFKAIHRRIYPLQSSETPPSWTAQAAVSNILYETPPPSSAPSKKHILNCLVQNEPGVLSRLSGILAARGFNIDSLVVCHTEVEDLSRMTIVLSGQDGVVEQARRQLEDLVPVWAVLDYTNAALVQRELLLAKINILGPEYYEELQAHHREITTESANSNSSEQQQQAHGNTSSERTFHPGSMPISEALRHKHEHLKSVTFLTHQFGGKVLDISTNSCIVEISAKSDRIDSFMKLIAPFGILESARTGLMALPRSPLYGPNEAEQVVEADEILDVTALPPS	317	ACT domain	P:GO:0009082; F:GO:0030234; F:GO:1990610; C:GO:0005948; C:GO:0042645	P:branched-chain amino acid biosynthetic process; F:enzyme regulator activity; F:acetolactate synthase regulator activity; C:acetolactate synthase complex; C:mitochondrial nucleoid	K01653	map00290,map00650,map00660,map00770,map01100,map01110,map01130,map01210,map01230	ACT,ALS_ss_C	G3DSA:3.30.70.260:FF:000001 (FUNFAM); IPR004789 (NCBIFAM); IPR027271 (G3DSA:3.30.70.GENE3D); G3DSA:3.30.70.260 (GENE3D); IPR019455 (PFAM); IPR054480 (PFAM); IPR053050 (PANTHER); IPR002912 (PROSITE_PROFILES); IPR039557 (CDD); IPR045865 (SUPERFAMILY); IPR045865 (SUPERFAMILY)	E	hypothetical protein Golomagni_02633 [Golovinomyces magnicellulatus]
aug-contig_110-processed-gene-57.137	MDKTSAPLADYFWIAGIDSNSYRDFSLSDAPHVSMNSPPVGAIVEDSKLESPPSTLTPSNRFAHSRKNSKIKFSKRTSTNEKPEEETDFLGSKRLSAQIKGSSNIFGNSPDNSINNNAGVEDIEFDRALLAFTSERELFLDEISFSAGAQVQKPLPMTQLPSKGADLLQIRDAENLGCPTSSFRKSPLRTVGGSIRRRISFRDMNSMKKQPNIQRTVSVRTCKRLSDYNSVIPPPEPINADPEMHPLRRRFEPVLLDRYPPKTATDETQRRGAFPDYLPMFAFPNDIQIVSADERPRSTWHGFAMTTEDAVKIYGVTIIVWTPLNSEASENLERRCHEWRLSHMSNEERELAASLAERLASERAHLSQLLAQLPTVVLGSAARDILEEQISVVEEKIGL…	994	Domain always found downstream of DENN domain, found in a variety of signalling proteins	P:GO:0032483; C:GO:0031410	P:regulation of Rab protein signal transduction; C:cytoplasmic vesicle	#N/A	#N/A	C1_2,DENN,dDENN,uDENN	IPR043153 (G3DSA:3.40.50.GENE3D); IPR005113 (PFAM); IPR001194 (PFAM); IPR051696 (PANTHER); IPR037516 (PROSITE_PROFILES)	#N/A	DENN domain-containing protein [Golovinomyces cichoracearum]
aug-contig_110-processed-gene-57.144	MPLAPSTSVPHRLALHLQKLYFRLIDYSPQLDYQDRLRAISQFQEKSLQNDDVDTQLAVPGHPIWRNPLFSHLFSKKQQRESLALTRKLTNFEEAIELQTPRGLLVHGEVGSGKSMLVDMLADGLPNEKKKRWHFNTFMLETFAKLEQNRRIRCQKTYHNETPEHSLLWLAKDMIEKSPILFIDEFQLPDRAASKIICQLLTAFFQLGGVLIATSNRMPDELSKSNGVNFIAPSTHRVAGGILGFNKKSHISTLSTKNEYAGFIEVLKARCEIWNMEGKRDWRRKEAEQLASEMYRADEIEKGDFTTFPQTSLPNEGSTKHVSRDLSAILPQNYFLKSSKNKAEWGNALKTILFSDAVDPIRWESQTLTVYARELIVPHHYHGVTFWTFKELCGKCLGP…	644	AFG1-like ATPase	F:GO:0005524; F:GO:0016887; C:GO:0005737; C:GO:0005739	F:ATP binding; F:ATP hydrolysis activity; C:cytoplasm; C:mitochondrion	#N/A	#N/A	AFG1_ATPase,DnaJ	IPR005654 (PFAM); IPR027417 (G3DSA:3.40.50.GENE3D); IPR005654 (PANTHER); cd00009 (CDD); IPR027417 (SUPERFAMILY)	#N/A	hypothetical protein Golomagni_00128 [Golovinomyces magnicellulatus]
aug-contig_110-processed-gene-58.100	MKCLRDGPLKPAIQRSLFTKKTDVLSKKSQCPFQIPAFGLGLFNHQIRRATNKASRPKTAIFFPGYGVQKVGMLGPWLKAFPSTAGYFIEEIDQIMGCKFSSTIEEGPNSLLNSTVNSQPAIMACSILILKIIEREFGFKTTERVDFALGHSLGEFAALVTAGNVYFEDSLYLIRKRAEVITDCTRKITAEYGGEYGMVALVTEPGKLPPLIEVIDEFLGYHSVGSKSESAENLPPIQQVLIASINSKNQIVLSGNIEKIYSLITHVRQIGYHAPRAVKLNSDCPFHSPMMIPAKKAMQKMLEGKSRVRGRENQDLVIFPGAIECISNVNARPFKCKEGLKDLWARSCTETVRWWDSIKYLDQDQSVRRWIGIGPGNVGRNLVGKEVGMRGKDPVKGGG…	426	Acyl transferase domain	P:GO:0006633; F:GO:0004314; F:GO:0016740; C:GO:0005739	P:fatty acid biosynthetic process; F:[acyl-carrier-protein] S-malonyltransferase activity; F:transferase activity; C:mitochondrion	K00645	map00061,map00333,map01100,map01130,map01212	Acyl_transf_1	IPR014043 (PFAM); IPR001227 (G3DSA:3.40.366.GENE3D); G3DSA:3.30.70.250 (GENE3D); IPR050858 (PANTHER); IPR016036 (SUPERFAMILY); IPR016035 (SUPERFAMILY)	I	hypothetical protein Golomagni_04235 [Golovinomyces magnicellulatus]
aug-contig_110-processed-gene-58.112	MEESLLLDFPNGECAPLPDSTIFSSEAEAFGWAQRQASTGGYAFSNLYKNKSKVTGDIILSCYNCDKGPKTYQNKPTTTSKSKQRDGTGSKKCGCQYKITIKPNESKKWVIIPKKSHNHGRNSSSIAHPAHRIAALQNTLRAEILNAANSGSSISQIMSAFREREGFNLIGKDISNIIQKERQKQLGGMTPLQWLLKELQDNGYNTRFETKDGNILSKLMYLHPQAIQLWKDHPDVLLMDCTYKTNRFNMPILNICGVTGGNKVIQLGLVFLSSEKENDYSWVLQQLKQIMTLEAITATLCAMGADDDEEQDETTINDDGREVTVANLI	329	NADH pyrophosphatase-like rudimentary NUDIX domain	#N/A	#N/A	K03426	map00760,map01100,map04146	FAR1,MULE	IPR018289 (PFAM); PTHR47718 (PANTHER)	#N/A	hypothetical protein K3495_g3010 [Podosphaera aphanis]
aug-contig_110-processed-gene-59.4	MMTSQSSALDKVLNMASTTRKENPTTNAELSSINGNSTTPTIMATKLSSVDEVVTAQQNDGAGQLAISSAEQLGTKNCKDGARKKSEMINIPEHDNNSMEQNILQLGPLTEFVSTSDYMTNPNLDMHTRFNSPLNSLEIFNPVEFAPFCLPGVMNLPVASNNTLVHNSYLRTSPLHQEPTRVSAYAKLIFEDGYFYMNTYSVVLGRDLKAWHAAIRKEKRRQNQLQNSRGLAGEPETPLCVKREGSRYSRSIVSESGGMLRAENDSDVEERMRWRRLRNLNKVSKKTKSTGSSSPGSRKNYNVQSCKAKVYEAQNLQSTISRVNGPIPADLATLRPSPHDCPLVAIHPPATAPISAYKSISREHVKIAFNSKKSYFEAHVIGRNGCFVQDQWYQTSDIV…	1248	FORKHEAD	P:GO:0006355; P:GO:0060962; F:GO:0003700; F:GO:0005515; F:GO:0043565; C:GO:0005634	P:regulation of DNA-templated transcription; P:regulation of ribosomal protein gene transcription by RNA polymerase II; F:DNA-binding transcription factor activity; F:protein binding; F:sequence-specific DNA binding; C:nucleus	#N/A	#N/A	FHA,Forkhead	IPR001766 (PRINTS); IPR036388 (G3DSA:1.10.10.GENE3D); G3DSA:2.60.200.20 (GENE3D); IPR001766 (PFAM); IPR045178 (PANTHER); IPR000253 (PROSITE_PROFILES); IPR001766 (PROSITE_PROFILES); cd00059 (CDD); IPR008984 (SUPERFAMILY); IPR036390 (SUPERFAMILY)	K	hypothetical protein Golomagni_01021 [Golovinomyces magnicellulatus]
aug-contig_110-processed-gene-6.100	MSYPQQSSHSSNVPHSAHPSLPDRPSASSYTTPFLNSPHDGPRPPAFGGFAPRSVNAPQLPYKNYQQPSYQQQYNNYAAPHQQEVAYGAAPQIRNPFAPPTTTLNSSLAYDEDPEMAAQIAQWQSAYVAKENSSTSGYTGGSRKFLNTNEGSGSATSANAAPLGGSQNMSSAAMTLAAHNDTGVATVVSDAKTNTKTVVRSGGGTTWTDSSLLEWDPLHFRLFVGNLAGEVTDESLYKAFSRWPSVQKARVIRDKRTTKSKGYGFVSFSDGDEFFQAARDMQGKYIGSHPVLLRRSTTEIKAVNPKDQRKNKNKIKGKGSRDKTNAGVQKSGSKLKGGLKLLG	343	RNA recognition motif	F:GO:0003676; F:GO:0003723; F:GO:0003729	F:nucleic acid binding; F:RNA binding; F:mRNA binding	#N/A	#N/A	RRM_1	IPR012677 (G3DSA:3.30.70.GENE3D); IPR000504 (PFAM); IPR050825 (PANTHER); IPR000504 (PROSITE_PROFILES); IPR034215 (CDD); IPR035979 (SUPERFAMILY)	A	hypothetical protein Golomagni_00253 [Golovinomyces magnicellulatus]
aug-contig_110-processed-gene-60.13	MSVEQEKDKSKVHKLSLKGSSKLVAEFFHYSINTILFQRGVYPAEDFTAVKKYGLTMLVSSDDQVKAYIKKIMSQLDKWMIGGKISKLILVITSGDTGEHLERWQFDVHISQQKSGKKGVKNKIDKENEKKNNLVLPDKTEAEIQSEIQSIFRQITASVTFLPELQGNCTFNILVYADMDSDVPIEWGDSDAKEIKNGEKVQLRSFSTSSHKVDTLVSYRLAD	223	HORMA domain	P:GO:0007094; C:GO:0000776; C:GO:0005654; C:GO:0005737	P:mitotic spindle assembly checkpoint signaling; C:kinetochore; C:nucleoplasm; C:cytoplasm	K02537	map04110,map04111,map04113,map04114,map04914,map05166	HORMA	G3DSA:3.30.900.10:FF:000002 (FUNFAM); IPR003511 (PFAM); IPR036570 (G3DSA:3.30.900.GENE3D); IPR045091 (PANTHER); IPR003511 (PROSITE_PROFILES); IPR036570 (SUPERFAMILY)	DZ	Mitotic spindle checkpoint component mad2 [Golovinomyces cichoracearum]
aug-contig_110-processed-gene-60.18	MSICHSSKKRSSSKKKKSSEYYHQIELIDDTSSVLSGKSRGNTPKKKATDQSNQSPRKECSANLYPHQSPFRLREELTRRKFAKYQDLDLLKKKDNSSSNGFGKKSRKRSLEKQEEEESSAQTGGKKSSALNKHSEDTEYAVDVLFENQRGLFCCGIPLFSGRALGNLDPAPWTNIAQKPSATDITNAQPPDPSWEWVGNNWSVYHANEPGECWKYSFAFNGRFSWHRGRWWNSFVRRRAWVRKRVKKNLEHDENESCVFSSHNPRVYPTESGHNNRLSLLKGKNCRSNSIILSKRNTSSETIENVHDISTLKKAFRSARIDREIIEVVKNFIKSGSDDLFNLKDQMHQIMHLFIFHASRLSLVAFLRESLNQALEQRENFINSQNKDEKDKVEALNFA…	412	meiotically up-regulated 65 protein	#N/A	#N/A	#N/A	#N/A	Pex24p	#N/A	#N/A	Meiotically up-regulated gene 65 protein [Golovinomyces cichoracearum]
aug-contig_110-processed-gene-60.23	MGQDYLLHLVDTPGHVDFRAEVSRSYASCGGALLLVDASQGVQAQTVANFFLAFSQGLRLIPVINKIDLASADPPRALEQLNHNFELDPENAVLVSAKTGLNVEAILPKVIEQIPHPVGDHTKPLRILLVDSWYDTYKGVVLLVRVFDGTVKAGDHVRSFATGIKYFVGEVGIMYPNQLPQNHLRAGQVGYIYFNPGMKKSQEALSGDTFTTVGSENIVLPYPGFEEPKSMVFVSAFPLDQSDHSHLEDSINQIVLNDRSVTLQKESSEALGAGWRLGFLGTLHCSVFEDRLRQEHGASLIITPPSVPYKVVWKGGREEIFQTPSQFPDIETRKQEIEALQEPYVTITITLPEEYLGKVIELCEGNRGEQKEINFFTATQVILKYDLPLAQLVDDFFGK…	536	Promotes mitochondrial protein synthesis. May act as a fidelity factor of the translation reaction, by catalyzing a one- codon backward translocation of tRNAs on improperly translocated ribosomes. Binds to mitochondrial ribosomes in a GTP-dependent manner	P:GO:0045727; F:GO:0003924; F:GO:0005525; F:GO:0043022; F:GO:0097177; C:GO:0005739	P:positive regulation of translation; F:GTPase activity; F:GTP binding; F:ribosome binding; F:mitochondrial ribosome binding; C:mitochondrion	#N/A	#N/A	EFG_C,GTP_EFTU,GTP_EFTU_D2,LepA_C	G3DSA:3.30.70.2570:FF:000001 (FUNFAM); G3DSA:2.40.30.10:FF:000015 (FUNFAM); G3DSA:3.30.70.240:FF:000007 (FUNFAM); G3DSA:3.30.70.870:FF:000004 (FUNFAM); G3DSA:3.30.70.870 (GENE3D); G3DSA:3.30.70.240 (GENE3D); IPR013842 (PFAM); IPR006297 (NCBIFAM); G3DSA:2.40.30.10 (GENE3D); IPR004161 (PFAM); IPR038363 (G3DSA:3.30.70.GENE3D); IPR000640 (PFAM); IPR000795 (PFAM); IPR027417 (G3DSA:3.40.50.GENE3D); PIR…	J	Translation factor GUF1, mitochondrial [Golovinomyces cichoracearum]
aug-contig_110-processed-gene-60.29	MSDNTATGQSLQPTISWSFDMLPKSLQRYGEYLDENWRTKVHDPSSSSYTPEMLSAHILRNMVSLMDQELRDDDLWDMFRSIFENWKLQDWKRTPGPVLKIFRNFLFENGVYTKIDNISIASKLDKLVLNEDFPEYPIEDIQSWLAKGKRFNSRFNPVKLVDPIKNPYIRKDQPQSIPPTSNQEFPDIPKFEAEMDSKDSSSFKQFPVNRITNIMPREVTNLMKIYQDDSIKYGGELYDSLDAKLKIFLDLCSKVGIHETQYHYAFSSMLKGRAINFYYQSIALEDRTFLQMVNLTKNHFETDAYKQFYITEWNTTSFRSLLKKNENTSKSQLDILELLFDNLRKIQQCLPNVYHSDLTLRDQIINACESVPECEKALFRPASTSEGVCADLRNAVRLK…	1672	Reverse transcriptase (RNA-dependent DNA polymerase)	P:GO:0015074; F:GO:0003676	P:DNA integration; F:nucleic acid binding	#N/A	#N/A	RVT_2,rve	IPR036397 (G3DSA:3.30.420.GENE3D); IPR013103 (PFAM); IPR050951 (PANTHER); IPR001584 (PROSITE_PROFILES); IPR012337 (SUPERFAMILY)	L	hypothetical protein [Scandinavium sp.]
aug-contig_110-processed-gene-61.22	MEPRARIGKNRGQQNFSDLELQQFLFGYGDDPQSLEPTKRILDEILTDFITELCFEAHRSAQASGRQKIKLEDIKFACRKNPAYLGKIKEVQDKKAEIDAARKLLDQNDDKISKSDVKALEEAPLGEADDDIDMDMQIQRGKSTGLGK	148	Transcription initiation factor IID, 18kD subunit	P:GO:0006366; P:GO:0051123; F:GO:0046982; C:GO:0005669	P:transcription by RNA polymerase II; P:RNA polymerase II preinitiation complex assembly; F:protein heterodimerization activity; C:transcription factor TFIID complex	K03127	map03022,map05168	TFIID-18kDa	IPR003195 (PFAM); IPR009072 (G3DSA:1.10.20.GENE3D); IPR003195 (PANTHER); IPR009072 (SUPERFAMILY); IPR009072 (SUPERFAMILY)	J	Transcription initiation factor TFIID subunit 13 [Golovinomyces cichoracearum] RKF71770.1 Transcription initiation factor TFIID subunit 13 [Golovinomyces cichoracearum]
aug-contig_110-processed-gene-61.23	MPLSNFASVKHPQKTPPSLFLGPPSLSTSHLTLANVSPTLSQDETGLNVPDVPFLRQKSSMPHQIPFRDYNGQGDSEQDSITTEDHHSRYDKENGGIWKGTDKSDDAQWAEMQSTLKDFETSSTNGKHVFGSQHSTALEGLRTAQIELAKAWARSEIEEATEGADNLKKGFPTMRNNPGVDGKPARSTESSGTERGGAKEQDFEADIIIARKRREANDRYFQRMNDSFLDVVSRLEEVASSMNSVAQESKAIWENLDTDRNRTSANENETK	271	Disordered region of unknown function (DUF5315)	#N/A	#N/A	#N/A	#N/A	DUF5315	PF17242 (PFAM)	#N/A	hypothetical protein GcM3_212011 [Golovinomyces cichoracearum]
aug-contig_110-processed-gene-62.120	MLQNNITFTATECHPPATTVKEALDRARECANCAQKTAVIALLESEIGIIWKKILARPDYLMTRDEFAIFNFFQTRFEGQQVARDARKRYWDHKHEDVIWRRDLILHPRSTIKLLADSTSVFSLLNVFQVYQPVIVASNENHKNDSAVFSHENTDIEANVSQSCQVRLMEYSFANSFGKPFVTDYTPPQCNFNRVIMKFTATSQGRQFDRLAIMYLGDIEVWRTSTAEPTRSGIYFEYIKDMSAYLSLWTSPQKLIFDLGNLIDEKYTGPINTTLTVIFSKTDSLSRHASQIIPISSRKSNLNASSVFQLPFDTAINTVTLPQNAKRAVFSLSACGQGDEEFWWSNVLQSHTQTFSKRNLTLFGYSPFREVQVLIDGQLAGVHWPFPVIFTGGIIPGLW…	735	amidase a	#N/A	#N/A	#N/A	#N/A	PNGaseA	PF25156 (PFAM); IPR056948 (PFAM); IPR021102 (PANTHER)	#N/A	hypothetical protein Golomagni_02405 [Golovinomyces magnicellulatus]
aug-contig_110-processed-gene-63.119	MGASIYILLLFLAITLTVVAEETTSIPDNLLSLTGTPVSTVPTGPYISFSSTLTVTSSAISTVSLISTITEKSTTRTTTEATTIYGIGNQAENVTIAPEPSETRTLLIGRPSTSSNVTANSTSSTPHEPSATNETPCNNYPQFCSRKYGHITEVSAHNSPFVRSGNAGANQALSVASQLDDGIRLLQAQIRFVNETPHFCHTSCQVLDAGPINHYLGQVYEWVSTHQYDVVSILLGNGDYKKVTEIAPFVEKSGLVQYAYIPKKIPMMMDDWPTLSSLILSGKRVLIFMDYEANQTAVPWIMDQFSHIWETPFSPTNRSFPCTIERPPNLSPNDAKQRMYILNNNLNYEISILGNSLLVPNIPLLNITNNVTGFGSLGQNVQQCNDTWNYAPKFLNVDY…	459	Tat pathway signal sequence	P:GO:0006629; F:GO:0008081	P:lipid metabolic process; F:phosphoric diester hydrolase activity	#N/A	#N/A	#N/A	IPR017946 (G3DSA:3.20.20.GENE3D); IPR051057 (PANTHER); IPR017946 (SUPERFAMILY)	#N/A	putative secreted protein [Golovinomyces cichoracearum]
aug-contig_110-processed-gene-64.21	MSGTHSQDSSNIVLSAGISLTKWKSGLQDRLAKNNVIGHVLHDYPGIRPITRPVDPTEGMAHNDVNFEVILQAHLRELEVWTLGEISAKNIIINRLKSSMCPRTHDHMTAQQLYDGIANTRKETATAPYALALEIFLRTRFVSHADEYIDRFQANLQSLNEAADTLHATTGTEYHITKGQAAAIFVLGTKHVPWLNTWRDLRACTDENSYTTLESVMCTLRVIDGHRVSLPNHNHPADHPNQAFAMHAKNGKDGPNDE	258	#N/A	#N/A	#N/A	#N/A	#N/A	#N/A	#N/A	#N/A	hypothetical protein K3495_g15510 [Podosphaera aphanis]
aug-contig_110-processed-gene-65.130	MEESLLLDFPNGECAPLPDSTIFSSEAEAFGWAQRQASTGGYAFSNLYKNKSKVTGDIILSCYNCDKGPKTYQNKPTTTSKSKQRDGTGSKKCGCQYKITIKPNESKKWVIIPKKSHNHGRNSSSIAHPAHRIAALQNTLRAEILNAANSGSSISQIMSAFREREGFNLIGKDISNIIQKERQKQLGGMTPLQWLLKELQDNGYNTRFETKDGNILSKLMYLHPQAIQLWKDHPDVLLMDCTYKTNRFNMPILNICGVTGGNKVIQLGLVFLSSEKENDYSWVLQQLKQIMTLEAIRAPLSIVTDRELALMKSLEAHFSDTPHLLCRWHVNMNVLAKSKKYFPKPTKKGNSYVRSPVFVEFLKQWNAVLAATSEETYKQEVAKLEAMAPKDAYIYVERT…	753	#N/A	#N/A	#N/A	#N/A	#N/A	#N/A	IPR018289 (PFAM); IPR052579 (PANTHER); cd07177 (CDD)	#N/A	hypothetical protein K3495_g3010 [Podosphaera aphanis]
aug-contig_110-processed-gene-65.132	MAKNFNINSKTITAPLAALCMAAILFVYSRTSILAAKRNAQKHREADGGQLNWHNENLRRHGKLERPVKEGTLGQLAATLQDRKKDTFSKAETSPGQIKRDLGERSAAEKELRDLIEADARGK	123	#N/A	#N/A	#N/A	#N/A	#N/A	#N/A	#N/A	#N/A	hypothetical protein Golomagni_00895 [Golovinomyces magnicellulatus]
aug-contig_110-processed-gene-65.139	MKSHDLRDLVDFPGDALRPAKKQKQNGPKNIMLKGLAREIQNLGCDNPIAIIPESLMYKKRHFGSQKPVAKWHLKPFKNTARDDQSLILRHWRKKVETTPQLNRRASTSFTESEIEDSVFAKFNVRIETVNYNDDQYKAHFQCSDWSKDETDYLMKLAEEYDLRWPIIWDRYDFQPRSSDMKSGGEKAVMSTSKARGVEDLKERYYQVSSGIMQITRDKTPLTAHERHILESMLKYNKQQEISRKKFAEVMFHRTIEEAIEEENLLLELKRILARSEKLGYERQELYTLLDAPPTTNPIGAYTSSQGLQQLLASLVQADKAKRGKSLNVPVVSPAGPNQTNQTNQYVDLSRESIGRDPNSGSIPPTKKSGQGSSDHRQLTPEEEVMFGVRQFDRITTTG…	550	SANT/Myb-like domain of DAMP1	P:GO:0000122; P:GO:0006281; P:GO:0006338; P:GO:0043486; F:GO:0003714; C:GO:0000812; C:GO:0035267	P:negative regulation of transcription by RNA polymerase II; P:DNA repair; P:chromatin remodeling; P:obsolete histone exchange; F:transcription corepressor activity; C:Swr1 complex; C:NuA4 histone acetyltransferase complex	#N/A	#N/A	DMAP1,SANT_DAMP1_like	G3DSA:1.10.10.60 (GENE3D); IPR032563 (PFAM); IPR027109 (PANTHER)	BK	hypothetical protein Golomagni_00897 [Golovinomyces magnicellulatus]
aug-contig_110-processed-gene-65.140	MRFKSKYECSKRPKEPYYSRLQLTCGAMPIATASGADPKNTGSARSRDHNQGNQDRKYTAEQKAEVLRVRRCSPTAFYDILGLEKVKKTATEAEIRKAYRRISLLTHPDKNGYEHADEAFKIVSRAFGVLSDKEKRALHDRSGGDPDSRFRGQQASSPFSGFGGRASGDGNRSGAYREELTPEEMFRRFFGGGTMGGFGGFDNSPGFVFNMGGGPGIRVQPFGGATPRRRPRSANPQQEQAASLRQTIMSFLPLIIILVLPILSSLISGFNSSPPGPTMRFDRPVQPHTLHRRTSNLKINYYIDPNDVKKFTPSKFNSLDNQAEINYVNRLNLDCQKEIQNKEDIINQAQGWFFTDPGKIFEASNLPMAACKRLESLGMRRLS	383	Domain of unknown function (DUF1977)	P:GO:0051085; P:GO:0071218; F:GO:0030544; C:GO:0005789	P:obsolete chaperone cofactor-dependent protein refolding; P:cellular response to misfolded protein; F:Hsp70 protein binding; C:endoplasmic reticulum membrane	K09518	map04141	DUF1977,DnaJ	IPR001623 (PRINTS); G3DSA:1.10.287.110:FF:000069 (FUNFAM); IPR036869 (G3DSA:1.10.287.GENE3D); IPR001623 (PFAM); IPR015399 (PFAM); IPR051100 (PANTHER); IPR001623 (PROSITE_PROFILES); IPR001623 (CDD); IPR036869 (SUPERFAMILY)	O	putative J domain-containing protein C17A3.05c [Golovinomyces cichoracearum]
aug-contig_110-processed-gene-66.20	MLRPLTTSTLPGLRLLKKDPSKTTSFSDFIELVKFKRKYITPTGENRFFIPMALSTSKLEMWFISSLAHASYCNEHISIYKPLFNVWKTSTNRLIRLKNKFLLRRWHSSATAGSDFGGRNTGCRPKNENQILEKHTHEELLNLVDDYQESYNLNVHSNSECGSLYHPEPDPNHKAPGESAYYYSSIPSADQETRETVEKLKLVLEMDRENLDLAYKIYRSLPHSRANYLDSETRHKLLHVLSVVEFKAEHSMLRYLSVVDDVKAVGIPLTLSEWNSAISFVARYVRITTETEVESALKMWKEMEYSAGVKGDNVTFNILFDVSCRAGKFALAEMIYKEMEARGLEYTRYHRVTKIMFHGFKQDGDGVRAAYRELVQSGEIVDTVVLNAMISALLKAREP…	615	PPR repeat	F:GO:0005515	F:protein binding	#N/A	#N/A	PPR	IPR011990 (G3DSA:1.25.40.GENE3D); IPR002885 (NCBIFAM); IPR002885 (PFAM); IPR011990 (G3DSA:1.25.40.GENE3D); PTHR47447 (PANTHER); IPR002885 (PROSITE_PROFILES); IPR002885 (PROSITE_PROFILES)	#N/A	putative pentatricopeptide repeat protein [Golovinomyces cichoracearum]
aug-contig_110-processed-gene-66.22	MEESLLLDFPNGECAPLPDSTIFSSEAEAFGWAQRQASTGGYAFSNLYKNKSKVTGDIILSCYNCDKGPKTYQNKPTTTSKSKQRDGTGSKKCGCQYKITIKPNESKKWVIIPKKSHNHGRNSSSIAHPAHRIAALQNTLRAEILNAANSGSSISQIMSAFREREGFNLIGKDISNIIQKERQKQLGGMTPLQWLLKELQDNGYNTRFETKDGNILSKLMYLHPQAIQLWKDHPDVLLMDCTYKTNRFNMPILNICGVTGGNKVIQLGLVFLSSEKENDYSWVLQQLKQIMTLEAIRAPLSIVTDRELALMKSLEAHFSDTPHLLCRWHVNMNVLAKSKKYFPKPTKKGNSYVRSPIFVEFLKQWNAVLAATSEETYKQEVAKLEAMAPKDAYIYVERT…	753	#N/A	#N/A	#N/A	#N/A	#N/A	#N/A	IPR018289 (PFAM); IPR052579 (PANTHER); cd07177 (CDD)	#N/A	hypothetical protein K3495_g3010 [Podosphaera aphanis]
aug-contig_110-processed-gene-67.1	MTTNLASVKRKRISDGSKSAASLRRKQSKDTQKQPEKIVWQARGKTSSTPDTLLVGRYLPSGKCCDLDISSTKKIKTKIAAFDFDSTIIQTKSGKVFPTNAQDWKWWNPSVPAKLKKLHLEDDFLIAIISNQAGLSLKTDSDPKSKLSQFKTKVLDIFEQLNIPMTIYAATEKDFYRKPRTGIWTELLRDYGIEDSMESLNLEDSIFVGDAAGRQAYRNKLKDFSCCDRNFAENIGIRFATPEEYFLSESARPFVYPFRPSDYIQESGIHKISPDQKHLLNSTNVVPQIYIKKNEVDIVLLCGSPGAGKSCWYQRNLKCHGYIRINQDILKTRDKCIKVASKSLEEGKSVAIDNTNANIEVRSEWVRLAARYNIPIRCVYLTTSTEICIHNNAVRAFND…	455	Polynucleotide kinase 3 phosphatase	P:GO:0006281; P:GO:0046939; F:GO:0003690; F:GO:0046403; F:GO:0046404	P:DNA repair; P:obsolete nucleotide phosphorylation; F:double-stranded DNA binding; F:polynucleotide 3'-phosphatase activity; F:ATP-dependent polydeoxyribonucleotide 5'-hydroxyl-kinase activity	#N/A	#N/A	AAA_33,PNK3P	G3DSA:3.40.50.1000:FF:000078 (FUNFAM); G3DSA:3.40.50.300:FF:000737 (FUNFAM); PF13671 (PFAM); IPR023214 (G3DSA:3.40.50.GENE3D); IPR006549 (NCBIFAM); IPR027417 (G3DSA:3.40.50.GENE3D); IPR013954 (PFAM); IPR006551 (NCBIFAM); PIRSR004682-3 (PIRSR); PIRSR004682-1 (PIRSR); PIRSR004682-4 (PIRSR); PTHR12083 (PANTHER); cd01625 (CDD); IPR027417 (SUPERFAMILY); IPR036412 (SUPERFAMILY)	L	Bifunctional polynucleotide phosphatase/kinase [Golovinomyces cichoracearum]
aug-contig_110-processed-gene-67.10	MDSQESISEMQNRHRIEQKNLQARIMQKKKGATKKTRRGIVSECEELQLQLSRKQEQERANSNQNIDQSLNLYGHTSDENHSMDPLKDELIKAKPTVDNITQALNTCTLVPESMPLSSFPVKKRNRQKERLARRAAENEAAIEEAKKEAANQPDNQSMERKIIMNQCAAKGLTEKFIRPDGHCLFSAIADQLTQIGIPLSGEADYQPEDQMYKIVREAAAIYLEEHSDDFLAWLDEPLCQYVEKIKNTAEWGGHLELLALARNYNVKICVIQNGALQTIHPLPDETKKPQEIWVAYYRHGFGLGEHYNSLRKVS	314	OTU-like cysteine protease	P:GO:0016579; F:GO:0004843	P:protein deubiquitination; F:cysteine-type deubiquitinase activity	#N/A	#N/A	OTU	G3DSA:3.90.70.80 (GENE3D); IPR003323 (PFAM); IPR050704 (PANTHER); IPR003323 (PROSITE_PROFILES); IPR049771 (CDD); IPR038765 (SUPERFAMILY)	OT	hypothetical protein Golomagni_02135 [Golovinomyces magnicellulatus]
aug-contig_110-processed-gene-67.15	MEESLLLDFPNGECAPLPDSTIFSSEAEAFGWAQRQASTGGYAFSNLYKNKSKVTGDIILSCYNCDKGPKTYQNKPTTTSKSKQRDGTGSKKCGCQYKITIKPNESKKWVIIPKKSHNHGRNSSSIAHPAHRIAALQNTLRAEILNAANSGSSISQIMSAFREREGFNLIGKDISNIIQKERQKQLGGMTPLQWLLKELQDNGYNTRFETKDGNILSKLMYLHPQAIQLWKDHPDVLLMDCTYKTNRFNMPILNICGVTGGNKVIQLGLVFLSSEKENDYSWVLQQLKQIMTLEAIRAPLSIVTDRELALMKSLEAHFSDTPHLLCRWHVNMNVLAKSKKYFPKPTKKGNSYVRSPIFVEFLKQWNAVLAATSEETYKQEVAKLEAMAPKDAYIYVERT…	753	#N/A	#N/A	#N/A	#N/A	#N/A	#N/A	IPR018289 (PFAM); IPR052579 (PANTHER); cd07177 (CDD)	#N/A	hypothetical protein K3495_g3010 [Podosphaera aphanis]
aug-contig_110-processed-gene-68.11	MDKSSHPIPGPKQETITPVDSSHEKGSSIPSSRAVDRLLPREPTSATSSTNPSRDSSPSRLLKSQIKAAYITRSSGPAPGAASTRSRKNNPPEISSVRSTNPPSAAATQRALSASSIPILQSVPPDSNTKLPVQRSLVTNEVKDNPYRSVPRHRSPPPLNDSTTLSPRKFDVELVSTPLRKSSKITDEAEDLFVDSESEELPLFSGMRTPARGVSGASSTLETVQEISQPGTPTHGADKIIEKFEITMTKSATCQEDEDEYGSPKTIKLKPSISANESGNESAEKKEVKLKVIRASLPSVNRPSGIPSKSFISAGIGRGKASGEGSSQNMTVETETVSSISQIAVGPGGLGNIGNIRAKPSCETIRPKKEKKKTVRKPPSLTSGTVNSLSCGLLTNELS…	853	Vacuolar segregation subunit 7	P:GO:0000011; P:GO:0010513; P:GO:1903778; C:GO:0000329; C:GO:0070772	P:vacuole inheritance; P:positive regulation of phosphatidylinositol biosynthetic process; P:protein localization to vacuolar membrane; C:fungal-type vacuole membrane; C:PAS complex	#N/A	#N/A	Vac7	IPR024260 (PFAM); IPR024260 (PANTHER)	#N/A	hypothetical protein Golomagni_02137 [Golovinomyces magnicellulatus]
aug-contig_110-processed-gene-69.155	MGIRAKITFTTLNDFIYPAKRVITLDSESGKVVIGRSSKSSSKDLHSSQDNAWFDSPVMSRNHAEISLDTDLKSLILRDIGSMHGTSINNFQLVNHMPVELRNGDLVLFGTEVKRGSETYPPCKFIIHYEISSYETANSFTTPDVTNLESNLYNEDYNKVSAGGLTQTQMILTSDEGMINRIDFQNKNSQTEPVTSVINDCSKISSRDLDDITLFETSSKIQKTIETTGNDRKRLYEIKSNSMSLDPAASLKDQDGKKIISDSSSQPKKDLDFLYHSDEKKKTDASSEDNVDKEPAPGAFTQEFDAQVKGPRDNFISEKGDLWDYVTQKGYSCEIERFNRNECEPLFAKDEISTKFGVELNSGHGSTLSPCEYDHPRHDEQDRTKIEYASTKNTLVEIN…	705	Forkhead associated domain	F:GO:0005515; C:GO:0005737	F:protein binding; C:cytoplasm	#N/A	#N/A	#N/A	IPR000253 (PFAM); G3DSA:2.60.200.20 (GENE3D); IPR051176 (PANTHER); IPR000253 (PROSITE_PROFILES); IPR008984 (SUPERFAMILY)	#N/A	putative fha domain protein [Golovinomyces cichoracearum]
aug-contig_110-processed-gene-69.159	MTACPPLSNSSLTTGASGPTLCEILAPHHRHLFISPTSAFSDLSLGLAKDVLDKSAGNLVDAQIERLKQIREQKKRKRKTAQPDLDLQVSKIRKIHTQGFAIENIWEQARRIIDALREDVEKNIDQINQTVASSGEEKFGNLVSDTDDKNQAQDENSDSGDEQEDTISCEDYISETSSNMKEDAELESEDDGIAEDLSKEASENLTSDEDNQGQEEDEDNEKTDTYYHEDPYGLNDGFFSIDEFNKQTELLELNDASADQYPEKDDEEDIDWNADPMSVHTKIVSSTNRSTGVNADKPQEDDGPTFGNMDLNAPSGESDEESETEKNKDYNIAQDNTNDIMYDDFFEPAPRKAGRAERQVRFLERKERTSKKLELSAEEPNLERTISDVKRDLFDDEST…	733	Involved in nucleolar processing of pre-18S ribosomal RNA	P:GO:0006364; C:GO:0005634; C:GO:0005732; C:GO:0032040; C:GO:0034457	P:rRNA processing; C:nucleus; C:sno(s)RNA-containing ribonucleoprotein complex; C:small-subunit processome; C:Mpp10 complex	K14559	map03008	Mpp10	IPR012173 (PIRSF); IPR012173 (PFAM); IPR012173 (PANTHER)	A	U3 small nucleolar RNA-associated protein MPP10 [Golovinomyces cichoracearum]
aug-contig_110-processed-gene-7.3	MQSAQHNFPSFTNPRNQWETHGNSAHRQTQQPPVQSTEPHNMIVYSWDDYADLPPREIPTSPVSPNLQAQFIKIWRQTDNFTGDPYDLLDDKTRHFLSVCDSISVTPNQFAPLFRLILNEKAQQFFLTRIGRKESFRGIYDKLKRHFDTEKNHHQYYTDWTSSTFTDMRQKMKDSSLSEVLEAFIEKKQLTQRALGVGYQDDGQLRTQIITNYRGVPELEQALFDPGSTSQELFAKLRSAITIYGDRTPSRYMQETEEYDQFIIDRRFNSNGSRRGGYNGRDKGHHKKVNSSYNKGKLTPRYSNSQEWKNKSYICKKEGCHSSNHSKEERMGARAQYFIDCEFFNDTPEYDQFLAEYEGEQPSQHKLQMQDEEEGQEMTGSNRYSAKTKFESNEIFQLS…	1474	Encoded by	P:GO:0015074; F:GO:0003676	P:DNA integration; F:nucleic acid binding	#N/A	#N/A	RVT_2	IPR036397 (G3DSA:3.30.420.GENE3D); IPR050951 (PANTHER); IPR001584 (PROSITE_PROFILES); cd09272 (CDD); IPR012337 (SUPERFAMILY)	L	hypothetical protein PtrM4_026130 [Pyrenophora tritici-repentis] KAF7578373.1 hypothetical protein PtrM4_026130 [Pyrenophora tritici-repentis]
aug-contig_110-processed-gene-7.4	MLCHHSRHIFQLLILLVTFITSIVCIPAKKNMLTQSGSDSQFSVTGPNGAYPRANYLANGKILGVYTNFQNSDQVLTLVTSSDNGDSWTLTGTAARKAEKDGTLDNGYVLQIPSGRVLLAFRNHDRDALGRITVYRITICRSDDNGASWKFHSDAVVVNATPENNGVWEPFLRNARDGSIQLYFSRERSALDQDSVMMNSRDGGTTWNDEKLISGLVESRSRDGMVGIAETGGQLIAVFETNENGGPFYLETVTSWDDGASWGNRKTLYKSPNGKNAGAPQIAIMKNTLLVSFMTDEDNNIGNAASWIDAADSKLLTSQDGGGTWSKTTIFQEPSYWPGLMVLNSNDEFLYLAGSNGLKSRKIRL	365	glycoside hydrolase family 93 protein	#N/A	#N/A	#N/A	#N/A	BNR_2	IPR011040 (PFAM); G3DSA:2.120.10.10 (GENE3D); PTHR38792 (PANTHER); cd15482 (CDD); IPR036278 (SUPERFAMILY)	G	/Sialidase superfamily/BNR/Asp-box repeat protein [Golovinomyces cichoracearum]
aug-contig_110-processed-gene-7.8	MAPAISLLSVNAILILNSEDGARVFTKYYNTPHKNAASALTFTTSTTITNPISPYCDIKAQKAFEKGLLEKTSKQTSDIILYDNQIVLYKSESDVMIYVVGGFDENEVMLYNVVLAVRDSLHLLFKQTVDKRTVIENYDLVALAIDEIVDDGIILETDPTIIAQRVSKALTQDVAQLKGIDLSEQGMNNLAQFGKAKLGDWLRQGL	206	Clathrin adaptor complex small chain	P:GO:0006886; P:GO:0006890; P:GO:0006891; C:GO:0030126	P:intracellular protein transport; P:retrograde vesicle-mediated transport, Golgi to endoplasmic reticulum; P:intra-Golgi vesicle-mediated transport; C:COPI vesicle coat	#N/A	#N/A	Clat_adaptor_s	G3DSA:3.30.450.60:FF:000013 (FUNFAM); G3DSA:3.30.450.60 (GENE3D); IPR022775 (PFAM); IPR039652 (PANTHER); cd14829 (CDD); IPR011012 (SUPERFAMILY)	U	putative coatomer subunit zeta [Golovinomyces cichoracearum]
aug-contig_110-processed-gene-70.178	MEESLLLDFPNGECAPLPDSTIFSSEAEAFGWAQRQASTGGYAFSNLYKNKSKVTGDIILSCYNCDKGPKTYQNKPTTTSKSKQRDGTGSKKCGCQYKITIKPNESKKWVIIPKKSHNHGRNSSSIAHPAHRIAALQNTLRAEILNAANSGSSISQIMSAFREREGFNLIGKDISNIIQKERQKQLGGMTPLQWLLKELQDNGYNTRFETKDGNILSKLMYLHPQAIQLWKDHPDVLLMDCTYKTNRFNMPILNICGVTGGNKVIQLGLVFLSSEKENDYSWVLQQLKQIMTLEAIRAPLSIVTDRELALMKSLEAHFSDTPHLLCRWHVNMNVLAKSKKYFPKPTKKGNSYVRSPIFVEFLKQWNAVLAATSEETYKQEVAKLEAMAPKDAYIYVERT…	753	#N/A	#N/A	#N/A	#N/A	#N/A	#N/A	IPR018289 (PFAM); IPR052579 (PANTHER); cd07177 (CDD)	#N/A	hypothetical protein K3495_g3010 [Podosphaera aphanis]
aug-contig_110-processed-gene-70.179	MQAQGWPKSLLRWTSSFLENRKVQVRFQGGVTDPKKLVCGVPQGSPISPLLFLLYMAEPMRSGNTIVRFSYADDVGILGFGRTISESAAAVQKEIDSLTNWAKDNAVLFDVKKSEVIQFPGRKREHPVGIAVNGSIINPAEHVRWLGVYLDPRLTFKYNVATWCAKALKLAQFLSRVNTVTRGAAPKALITAIESCIVSVATFGAEVWWPGMTRPVAKGTVVPPTAHLCGLIDKALHIALRAALPVWRTTPNVVLHREGGIPPARILLEGYRLRLAARLNSLDDRHPLRWRASICPNVGTLKYKLKPRLSKRPEKQMSRVQRALRQLPQSEAAEPLSAHKYSSTLGSKVNGVQDYQNWIRTIDVIDICAYSDGSSEGPGRSSWGYVLQRGGIIFQRGKG…	659	reverse transcriptase	F:GO:0003676; F:GO:0004523	F:nucleic acid binding; F:RNA-DNA hybrid ribonuclease activity	#N/A	#N/A	Exo_endo_phos_2,RNase_H,RVT_1	IPR036397 (G3DSA:3.30.420.GENE3D); IPR000477 (PFAM); IPR002156 (PFAM); PTHR33481 (PANTHER); IPR000477 (PROSITE_PROFILES); IPR002156 (PROSITE_PROFILES); cd09276 (CDD); IPR012337 (SUPERFAMILY)	#N/A	hypothetical protein K3495_g6723 [Podosphaera aphanis]
aug-contig_110-processed-gene-71.139	MNGIDDDRIFDDELVAEIAATKSDDGSLSSAVEDPTNIALQFLSNASPEAIAGVAVGLATCTYFVLGRVGLILMGAFAGVILHATWERQSTTDRMSVRRENSLDIIKRILDLGENNKCGAVHIKEERYADDFETLQPETAAALRELVDAIIRDYVKSWYQRIIPKDISFLTATQKCLNRFIFSISCHLSKKRPEDIFLDFLTNSSSIIIVFLSELSAALTLSPGPATEAVYSYLFANPESSLANALDEQNQKKKLKIAASDLLQNFLDKSIHNCNPVRIFLNEILSSLVLESILKSCSKPEWINGWIVFILEEGESNLSQAIDAGMEKDRHEGGPIENTKNTGHTGSAPSLESNPLCEKKGTANFTKLSKSEQAIIETRKLSLLIAEEEAKKKTELPSS…	1039	Sorting nexin C terminal	F:GO:0035091; C:GO:0043231	F:phosphatidylinositol binding; C:intracellular membrane-bounded organelle	#N/A	#N/A	Nexin_C,PX,PXA	G3DSA:3.30.1520.10:FF:000065 (FUNFAM); IPR003114 (PFAM); IPR013937 (PFAM); IPR036871 (G3DSA:3.30.1520.GENE3D); PTHR22775 (PANTHER); IPR001683 (PROSITE_PROFILES); IPR003114 (PROSITE_PROFILES); cd06093 (CDD); IPR036871 (SUPERFAMILY)	U	putative px domain-containing protein [Golovinomyces cichoracearum]
aug-contig_110-processed-gene-73.2	MVGLILRRWFWPKLRDYVRRFIRNCDVCERTTVWREAKAGFLRSLPVPDRIGSDLTIDFVTDLPPSEGCTNIMVITDRLSKDIFMFGTNSMKAENCAKLFIDRYYQYFGFPRYLTSDRGSDWTSHFWKAFYQHTGITQRLTTSYHPQSNASERANQEIYKYLRVFTCYAQDDWMNLLPLAQLALNGRPNSAIGGMSPFFLRHGYDLNPLMEPTSFQDQNSSHPGRVSATAYIQRLRDAQDYAQAAMASAQQRAEQNANRLRRQPERFQVGEKVWLDLRHIKTPQLSKKLAWQHAKYEVTAVPDALTVELNVPGNIHKRFHVELVKRAGNDKFPSQITDDTQNQPIIDDLEEPEYEVESILRARTARRGRGLFRQALVKWVGWVEPTWEPIENLKDTVAL…	444	Encoded by	P:GO:0015074; F:GO:0003676	P:DNA integration; F:nucleic acid binding	#N/A	#N/A	Chromo,Peptidase_A2E,RVT_1,rve	IPR023780 (PFAM); IPR001584 (PFAM); G3DSA:2.40.50.40 (GENE3D); IPR036397 (G3DSA:3.30.420.GENE3D); IPR041588 (PFAM); IPR050951 (PANTHER); IPR001584 (PROSITE_PROFILES); IPR000953 (PROSITE_PROFILES); IPR016197 (SUPERFAMILY); IPR012337 (SUPERFAMILY)	Z	hypothetical protein K3495_g1172 [Podosphaera aphanis]
aug-contig_110-processed-gene-75.10	MTGPPNTNIDIDRENWGKIKIDPSNVETTATLINSYILWTIQMYKEMKYRDSELWSMFKEDFEGWNENMFNSADKRAVHLLRDYLRENGVWVAKVNRTSRAKMIQQILDDKEEHIWTEGDIAEALLDEERTGRIFNSYYNPRIREQEATSRVSSVATSVVDATTGINAISPTYVPLTKCFTNSNAKEKDKQNFTGAPVNNHPPSQESINRSKEPESRAPPISYQPFDRWNPGTIQPQLVPAVRAIADLMKIYQNDKKYGEGHDILDAKLQIFYDYCDKLSIPEFQYSNAYSAMLKGRASNYYYQYLRGRNYTFDQMVSMTRNYFETEEFRQEYLTKWRETTLAKKILENPEKSKLQCLDITIDELQRVQQGLSPEYQQENNLRDQILNACRGINECNMA…	1735	Encoded by	P:GO:0015074; F:GO:0003676	P:DNA integration; F:nucleic acid binding	#N/A	#N/A	RVT_2,rve	IPR036397 (G3DSA:3.30.420.GENE3D); IPR013103 (PFAM); IPR001584 (PROSITE_PROFILES); IPR012337 (SUPERFAMILY)	L	hypothetical protein K3495_g4456 [Podosphaera aphanis]
aug-contig_110-processed-gene-76.16	MEESLLLDFPNGECAPLPDSTIFSSEAEAFGWAQRQASTGGYAFSNLYKNKSKVTGDIILSCYNCDKGPKTYQNKPTTTSKSKQRDGTGSKKCGCQYKITIKPNESKKWVIIPKKSHNHGRNSSSIAHPAHRIAALQNTLRAEILNAANSGSSISQIMSAFREREGFNLIGKDISNIIQKERQKQLGGMTPLQWLLKELQDNGYNTRFETKDGNILSKLMYLHPQAIQLWKDHPDVLLMDCTYKTNRFNMPILNICGVTGGNKVIQLGLVFLSSEKENDYSWVLQQLKQIMTLEAIRAPLSIVTDRELALMKSLEAHFSDTPHLLCRWHVNMNVLAKSKKYFPKPTKKGNSYVRSPIFVEFLKQWNAVLAATSEETYKQEVAKLEAMAPKDAYIYVERT…	753	#N/A	#N/A	#N/A	#N/A	#N/A	MULE	IPR018289 (PFAM); IPR052579 (PANTHER)	#N/A	hypothetical protein K3495_g3010 [Podosphaera aphanis]
aug-contig_110-processed-gene-77.148	MAESKIDSKVNLKNVEESNSGMAIAGLLLPGSMKLRGPENYLQWKQVMIRNIIASGLLKYIQSSQNNPSIDISNWQSLKEEDLSGISEWVMGNTKAANAIMYNCSSTPQTIIANYHNAAEMWNALEQAYEGTGIVVQHQELIKFVTLKYEDFNDLSGFITAFKNTIQRLSQVMDNNETIPSYWPAMLFVHALQKKFPIWTDRQRNRQRDKDIHNRPSLEELISDIQDEARRTNLKDSKSDTTKALYSGGKGKDKSSSKFCKTCKSRYHVTSDCLHNNSVKRKAWEEKTGKKWLSKEEFERIKCTNSDSSDSQDTLNKKINLYSSSRNKGSFSYKSSRSQYIAMVNFLPKALTSKDPAIILKDRWLADSGADTMVTNQMSDFTDYQNNPIEIDGAGGTTS…	1492	Reverse transcriptase (RNA-dependent DNA polymerase)	P:GO:0006508; P:GO:0015074; F:GO:0003676; F:GO:0004190	P:proteolysis; P:DNA integration; F:nucleic acid binding; F:aspartic-type endopeptidase activity	#N/A	#N/A	RVT_2,gag_pre-integrs,rve	IPR036397 (G3DSA:3.30.420.GENE3D); PF14223 (PFAM); IPR013103 (PFAM); IPR054722 (PFAM); PTHR11439 (PANTHER); IPR001584 (PROSITE_PROFILES); IPR001995 (PROSITE_PROFILES); cd09272 (CDD); IPR012337 (SUPERFAMILY); IPR043502 (SUPERFAMILY)	L	hypothetical protein K3495_g13243, partial [Podosphaera aphanis]
aug-contig_110-processed-gene-78.11	MPPKTNTQTNSTREQASLADFELESSSGISTVVRNIPNVSASNYSTERIENSSSHPVKTLDRELNVAKPTNRTRGSRSRARSSTTTPAVSRFKPKNVRRSAAELAELAQKEDARKVAVMAEHAREQARLARGRGKQRGRGDTMGRGRGTIGSASSIFGVTPESLRNTSGMMSVRSGGAGSSGSSGTSARISVNNREPGKYRPDASGGTGPRGNTTYFTPQYPGEDDDVIRVDIENINLVSDDDDNLEYTGDRKILNDKRGVSRGGLRPVRLYREEHKERVTIVNTTSKPSVDLKATSQDDNDEEEGLFVTDNKRSSSSVNKKIEILTSDRKDREISLEPKIKQEPNLDQSFSLVESPSIITQSGILTDSILESRQSNQNDLDTSSNLIESELKGDSMLK…	654	DNA-directed RNA polymerase III RPC4	P:GO:0006383; P:GO:0042797; F:GO:0003677; C:GO:0005666	P:transcription by RNA polymerase III; P:tRNA transcription by RNA polymerase III; F:DNA binding; C:RNA polymerase III complex	K03026	map00230,map00240,map01100,map03020,map04623,map05169	RNA_pol_Rpc4	IPR007811 (PFAM); IPR007811 (PANTHER)	K	hypothetical protein Golomagni_03062 [Golovinomyces magnicellulatus]
aug-contig_110-processed-gene-78.16	MREVNFSIPNVNKASVGITTALYDRRALDCTSTLPLINSLNHLAYLTTSSARIRDILTVDGGVERLVCLLKAGRSKDPMDMWKWNLAFQCVVNVGVRGSENVRTRIVEADLIPVIATILDNYIKVVDRCREKAEEAMQAQEHRLHASRAVESQISNKNFSFGNRSLRPQLSRGSRRQPPPPSIDIPLPLTNGAQTMSDAMDITPTTSQPIVSSLPERANFTTNRRHHHHRIQDVRQHSLPSRYTLQSLGVSAPPMDTADGLSIRPVRDVDRLPSMVAEFQNSHVSRPDSPTTPLPTSSMHTDAVTADPTPTSNLRQRRRPNIRHQTSIGAAEDLNADSMVSDEPRDPEISGVSTATIQSSVNVNIQEIGMDDSESILNAVESRLGLNTPTVSDTQGTDN…	634	MYND finger	P:GO:0006511; P:GO:0007163; C:GO:1990304	P:ubiquitin-dependent protein catabolic process; P:establishment or maintenance of cell polarity; C:MUB1-RAD6-UBR2 ubiquitin ligase complex	#N/A	#N/A	zf-MYND	G3DSA:6.10.140.2220:FF:000003 (FUNFAM); G3DSA:6.10.140.2220 (GENE3D); IPR002893 (PFAM); IPR051664 (PANTHER); IPR002893 (PROSITE_PROFILES); SSF144232 (SUPERFAMILY)	#N/A	MYND-type zinc finger protein samB [Golovinomyces cichoracearum]
aug-contig_110-processed-gene-78.17	MMHFTRARKRHNLAAPMVIQTHEKKPQASLRILGIVFDSKLNWDAHVHSVHLKAAAQLKVMSRLTQSTWGANFMKSKLLYSTLVRPALTYGSAIWAEAGPKGSLPERIVKPLRSIQRKCLKLITGAYSSTSCRVLEHETSVLPIELYLKQKRIQYAGFSEKQPAKEAVESAFERIKLSACGRENIRSRHKRGDLAEWKEICGKETDKRRQKEILNIASFQQWEIIWRNHTPKQHLRHRAPADPETWKAANITIDQKTGRLRMNLKGTPSAIHKNLKRAQSSIATQIRSEHIGLNAYLHRRKVPGVEDPRCQCGYPSQNAKHMVMVCPQWARGRGGVLRKARNRSFEAMMDNPEDVGRITKWIQREGWIEQFRLTRAVEAVMEERRMGKG	389	#N/A	#N/A	#N/A	#N/A	#N/A	#N/A	PTHR33481 (PANTHER)	#N/A	hypothetical protein K3495_g6322 [Podosphaera aphanis]
aug-contig_110-processed-gene-79.13	MLDLLFSYSQRLIDSWYGPTMASNDGFDANILIERILDYYDQMVVHRKSDSFAEINDLMSGIRLICAKPINERVTTLILDDPRIIEIVQDLRSFCSEIEFRLETLWSLKAVAGENKVCARILEYPYINVFANLISVELSGMRSAEKKPIKKIAFIGSGPLPLTSLCLTGMIFEAPTGISVLNIDRDEGALELSKTLCSRLGKKAGDIEFLLAEAGSNVELYEYDAVYLAALVGSTQQEKEILLEQVTSKMRPGALLVMRSGCRIKSLMYSNLDPTSEAVSKLIDIVEILHPSKFNTINSTFIGRVKEANDRSSST	315	Nicotianamine synthase protein	P:GO:0030418; F:GO:0030410	P:nicotianamine biosynthetic process; F:nicotianamine synthase activity	#N/A	#N/A	NAS	IPR004298 (PFAM); IPR029063 (G3DSA:3.40.50.GENE3D); IPR004298 (PANTHER); IPR004298 (PROSITE_PROFILES); IPR029063 (SUPERFAMILY)	#N/A	hypothetical protein Golomagni_02589 [Golovinomyces magnicellulatus]
aug-contig_110-processed-gene-8.10	MDLTEGLGEEKLNLENLYLKLQDLELLEEQIMVGVDTVFGRAFFNGLEIYTDGTNGQKIRHKSFSDSPFFEEVRDKAIFFKNAVQKINQFRDILRMHINICSRPYLRSLHILELPDEILIQICEYVQGREEYYVRHLPEINIGIDEVKNMRLTCRRFCNASSHLLISCMNLEFDSDSLSYLKEISNHPTISKGVRVIRLNLLYYDYVLEEDIDTFGDYHARRLLETTECIQDMANYGTDLFTGTPKDVVKSSILKGFSIGNAWLYLGGETTNKVSEEDLGYQKLLLKAYRKYRKLYARQKHLQLTGNYPRAISAAMSKMSNATRLDIFNSDFITRPKRHQRPDFITMVNNEESLIRSTLFPITWEKGRRFGLGEPPLELLYQLPIAIKKAGIFLTSLDI…	614	#N/A	#N/A	#N/A	#N/A	#N/A	F-box-like	#N/A	#N/A	hypothetical protein Golomagni_00173 [Golovinomyces magnicellulatus]
aug-contig_110-processed-gene-8.12	MSEHANGSITLPRDFRFRYQDALSTPEPLCDAELSQPSPPRQRIKLRRRVASSLRAPTEQFLQSVAAADFPLPTIEYSEAIGDSKRSDMVDEYKAESFVPQGYNHPPKTPTPSENELRPDWYTGAIPENNYRRPTSSHSVDSDLSHESTCSNGRFSRLSEDESCMTPESEYSNPFIFPTIKAKANKEKQFYEEEKSQIRTGKLNANIRIKVRNNAPWSSAQTAHLWATYLLYLQDPTVTPLRIGASLAPPEGVCHRVAREARRSWKGPKINQSRLLHNNCHPQDEDMNISQPEKKVRIYAKWPHSSSATRNNLRNLCRQRDASTVSRFHHYQQSRIQTPFSKSTPCRPSQNVVTTSHESNLNVQDISISLSLSTATSMQPDGPLASLAHHRIRDDYQSS…	602	#N/A	#N/A	#N/A	#N/A	#N/A	#N/A	#N/A	#N/A	hypothetical protein Golomagni_00170 [Golovinomyces magnicellulatus]
aug-contig_110-processed-gene-8.2	MVLANENEKDEALILTRILDVEAVDNDLGYFQDRETLDHWITQPNEKPQISNLYEVAEYLRNNRKHHQLLPVAFPTETVYGLGADATNSDAVKGIYKAKGRPSDNPLIIHVCDLNMLREVIRPGYLGTALSQVECDDNHPSPTEDPIPNIYKSLIKRFWPGPLTILLPNAIDSKLAPEVTAGLNTFGARMPDSCLALSLISLTGKPLAAPSANASTKPSPTTANHVLHDLRGKIEIIVNGGEPCTVGLESTVVDGLCYPPVILRPGGIDIDLIRECPGWEDVCNAYEDEKNIPTSSSKIPRAPGMKYKHYSPKAQVILHESSSMFTSFDNEDMSDSRRQPNIQLWQNFSLIDFSNKSNNRNTSHLPLLPSLIGIIRTKHWDSWGGINGLKIGADSNFSE…	516	Putative GTP-binding controlling metal-binding	P:GO:0006450; F:GO:0000049; F:GO:0003725; F:GO:0016779; C:GO:0005737	P:regulation of translational fidelity; F:tRNA binding; F:double-stranded RNA binding; F:nucleotidyltransferase activity; C:cytoplasm	#N/A	#N/A	SUA5,Sua5_yciO_yrdC	G3DSA:3.90.870.10:FF:000008 (FUNFAM); IPR038385 (G3DSA:3.40.50.GENE3D); IPR006070 (PFAM); IPR005145 (PFAM); G3DSA:3.90.870.10 (GENE3D); PIRSR004930-1 (PIRSR); IPR050156 (PANTHER); IPR006070 (PROSITE_PROFILES); IPR017945 (SUPERFAMILY)	J	hypothetical protein Golomagni_03641 [Golovinomyces magnicellulatus]
aug-contig_110-processed-gene-8.5	MAQSDNDSQHSEPKGEDEERLEELVFGNGFDFRTKLKSDEGTKKERSSHEQVLESLFFMDSGPSRNDQRNQARNSATHISSLQSTFDDATDEPAWIDSDDERLVVSLATNSRLRKLRVNEDEDIINGQEYIRRLQRQYVRLNPVPLWAQEPCRAFKQRRRSSTMIDSSASSSEDDDPQSSIQPLANILQQAGSLTILPNSTKRPKLRPEVLDIQQTRPIPSTQSSAVLSLSFHPKLPILLSSGLASTLFLHHIDPIAHPTPNPLITSVYVKRTPLFTSSFLFPKGEKIIFSGRRKYFHVWDLESGNIEKVTRVYGQKDEQKSMEVIKPSPCGRYLALQATSKKGGGIINILDANTTQWIVSMRIEGAQGVADFAWWRNGEGLTVISKTGEVGEWSIEER…	552	WD40 repeats	P:GO:0006364; F:GO:0005515; C:GO:0032040; C:GO:0034388	P:rRNA processing; F:protein binding; C:small-subunit processome; C:Pwp2p-containing subcomplex of 90S preribosome	K14553	map03008	WD40	G3DSA:2.130.10.10:FF:000549 (FUNFAM); IPR015943 (G3DSA:2.130.10.GENE3D); IPR045161 (PANTHER); IPR001680 (PROSITE_PROFILES); PS50294 (PROSITE_PROFILES); IPR036322 (SUPERFAMILY)	#N/A	hypothetical protein Golomagni_00172 [Golovinomyces magnicellulatus]
aug-contig_110-processed-gene-8.8	MKISIRTTACVLVTFLFSFFSFLVSAITVSYDSSYDDPSRNLDSIACSDGTNGLLTKNYATQGSLPSFPRIGGASVIAGWNSENCGTCWTLTYNHTSINVLAIDKASQGFNIAKAAMDTLTGGHATAFGRVDANYTRAEPSDCRM	145	Cerato-platanin	#N/A	#N/A	#N/A	#N/A	Cerato-platanin	IPR010829 (PFAM); IPR036908 (G3DSA:2.40.40.GENE3D); IPR010829 (CDD); IPR036908 (SUPERFAMILY)	#N/A	hypothetical protein Golomagni_03292 [Golovinomyces magnicellulatus]
aug-contig_113-processed-gene-0.1	MEESLLLDFPNGECAPLPDSTIFSSEAEAFGWAQRQASTGGYAFSNLYKNKSKVTGDIILSCYNCDKGPKTYQNKPTTTSKSKQRDGTGSKKCGCQYKITIKPNESKKWVIIPKKSHNHGRNSSSIAHPAHRIAALQNTLRAEILNAANSGSSISQIMSAFREREGFNLIGKDISNIIQKERQKQLGGLTPLQWLLKELQDNGYNTRFETKDGNILSKLMYLHPQAIQLWKDHPDVLLMDCTYKTNRFNMPILNICRVTGGNKVIQLGLVFLSSEKENDYSWVLQQLKQIMTLEAIRAPLSIVTDRELALMKSLEAHFSDTPHLLCRWHVNMNVLAKSKKYFPKPTKKGNSYVRSPIFVEFLKQWNAVLAATSEETYKQEVAKLEAMAPKDAYIYVERT…	753	#N/A	#N/A	#N/A	#N/A	#N/A	#N/A	IPR018289 (PFAM); IPR052579 (PANTHER); cd07177 (CDD)	#N/A	hypothetical protein K3495_g3010 [Podosphaera aphanis]
aug-contig_119-processed-gene-0.79	MVEASLKGEEKVNGALDMSGLLLPSSMRLTGPDNYLQWKQIVLRNIIAAGLAKYLRAESEESKVDLTKWQSMDQSKLDKLFEWVTGNTKTANTIMYNCESTAQLIITNYQTAAEMWRALEQAYEGTGIVVQHQELIRFVNFKYEDYDDLSNFITSYKNTVQRLSQVMDENEIIPRYWPAMLFVHALQEKFPIWADRQRNRQRDKDVRMRPSLEELISDIQDEARRTDDNSKSDSIKTLHVQGKDSEPNSRCKTCNSKYHITDNCLHNNEDRRRAWENRTGKKWLSKEEYKKQRSLVVDVNSYGSSNKRVDLYYSLSKAARFPTVLPLKSSPTEKSFLPKALTKKDPSIIFKDRWLADSGADTMVTNQISDFLEYTADQLDIQGAGGITTSPGVGIVQLN…	1503	Reverse transcriptase (RNA-dependent DNA polymerase)	P:GO:0015074; F:GO:0003676	P:DNA integration; F:nucleic acid binding	#N/A	#N/A	RVT_2,gag_pre-integrs,rve	IPR013103 (PFAM); IPR036397 (G3DSA:3.30.420.GENE3D); PF14223 (PFAM); IPR054722 (PFAM); PTHR11439 (PANTHER); IPR001584 (PROSITE_PROFILES); cd09272 (CDD); IPR012337 (SUPERFAMILY); IPR043502 (SUPERFAMILY)	L	hypothetical protein K3495_g13243, partial [Podosphaera aphanis]
aug-contig_119-processed-gene-1.145	MADECLDDRSTSDIMLPSPLMPNASRHGRGRHGGSFTKNKTRGRAYSAIDERQWLISKTLSKVLKLTTNGDDGPEASDNWANCEKVVSMPLILQYHEEKYNRSQLAHDEISVLGTEFSEIQALCNLSKSKFALKPKPGISNPDLNASDYLIGSNPSTIFPTANEPTSTNLIALSLQSSSLPKLIVYETSYANYPLVLASGGIRRAGGQAFLSFKTVPLIDATELPPVTADVSIYIDLPLAMERDKNIKWFRSEIGTVITEGDTEGKIDKSIWKNVVGRRADIGNLFEDGQVKKEVPIGLRGKGAKPKKSGKGKVTAIAEIRSHEKNIETCPSE	333	RNA 2'-phosphotransferase, Tpt1 / KptA family	F:GO:0016740	F:transferase activity	#N/A	#N/A	PTS_2-RNA	IPR002745 (PFAM)	E	hypothetical protein Golomagni_05442 [Golovinomyces magnicellulatus]
aug-contig_119-processed-gene-1.146	MSDTETPEFKPWTAKDVSASTSTQIAEYIEERIQAYIEDNISGRELYELWNLDFESFSSVEYKKTTAQTKALQDFLRSRNVFIPRKGHSIATELLKAQTTPWARMPDEYLNEIDEKHRPINFSSKSPNKLHPDSMRTRVEAKTTNSYSFINLMKINNDEAKYGGSSSDLFDSKFETFCENCDMTCIGVEDRNRAFRFMLKENALGHYRALIREKKGIIPSLDSLYTSIKNIFEGQEHEQMLLATWNELSLQSVINEQEGSKDVAKALTTLTTKLRTIQSGLNQSLRNSTYLYAKLSTACRGHPAIQAACSTYSSNNNVTDLSNRLQASIATWKAELSFNQQAQVQYPQEIDTEIDQYYTDRRFKGQVNRHIHQNHKRNTQNFEKTKKCFVCRNPNCWST…	1470	Encoded by	P:GO:0015074; F:GO:0003676	P:DNA integration; F:nucleic acid binding	#N/A	#N/A	RVT_2,rve	IPR036397 (G3DSA:3.30.420.GENE3D); IPR013103 (PFAM); IPR050951 (PANTHER); IPR001584 (PROSITE_PROFILES); IPR012337 (SUPERFAMILY)	L	hypothetical protein K3495_g2637 [Podosphaera aphanis]
aug-contig_119-processed-gene-10.122	MNDQIRVKLCRKKEDNKNLAQNELIAWVNETYKLKLSQGTVSNTLKRSQELLRGAETAHGSNPNAKRHKAVTYPLMEEALNNWFLTRQEMANMSGDLLKFKDAAADIHINGKVQTTLDT	119	CENP-B homolog protein 2-like	#N/A	#N/A	#N/A	#N/A	DDE_1,HTH_Tnp_Tc5	G3DSA:1.10.10.60 (GENE3D)	BD	hypothetical protein K3495_g2199 [Podosphaera aphanis]
aug-contig_119-processed-gene-10.124	MEESLLLDFPNGECAPLPDSTIFSSEAEAFGWAQRQASTGGYAFSNLYKNKSKVTGDIILSCYNCDKGPKTYQNKPTTTSKSKQRDGTGSKKCGCQYKITIKPNESKKWVIIPKKSHNHGRNSSSIAHPAHRIAALQNTLRAEILNAANSGSSISQIMSAFREREGFNLIGKDISNIIQKERQKQLGGMTPLQWLLKELQDNGYNTRFETKDGNILSKLMYLHPQAIQLWKDHPDVLLMDCTYKTNRFNMPILNICGVTGGNKVIQLGLVFLSSEKENDYSWVLQQLKQIMTLEAIRAPLSIVTDRELALMKSLEAHFSDTPHLLCRWHVNMNVLAKSKKYFPKPTKKGNSYVRSPIFVEFLKQWNAVLAATSEETYKQEVAKLEAMAPKDAYIYVERT…	753	#N/A	#N/A	#N/A	#N/A	#N/A	#N/A	IPR018289 (PFAM); IPR052579 (PANTHER); cd07177 (CDD)	#N/A	hypothetical protein K3495_g3010 [Podosphaera aphanis]
aug-contig_119-processed-gene-11.12	MGKIKQNKRNNSSTESSPYIKTRKGVNNVFKFNTNVGQHILKNPGVAEAIVAKAFLRPSDTVLEVGPGTGNLTVRILEKASKVIAVELDPRMAAEVTKRVQGKPEQKRLEVLLGDVIKMDTLPRFDVCISNTPYQISSPLVFKLLALPNPPRTSVLMFQREFAQRLTARPGDALYCRLSVNVQFWSKVTHIMKVGKNNFKPPPQVESSVVRIEPKLGSERPGVSWDEWDGMLRICFVRKNRTLRASWLGTKEVLALVEKNYRVWCAMKNIAIDETVIGEDEAMEIVETEEDVWDGIMDVDESIDDTPSFFKEEQDRIRREASQKTPSKKNKTRVAELVREKIRKVLEDDTELADKRAGKCDENDFLRLLFAFNEEGIHFS	380	Belongs to the class I-like SAM-binding methyltransferase superfamily. rRNA adenine N(6)-methyltransferase family	P:GO:0006364; P:GO:0031167; F:GO:0000179; C:GO:0005730	P:rRNA processing; P:rRNA methylation; F:rRNA (adenine-N6,N6-)-dimethyltransferase activity; C:nucleolus	#N/A	#N/A	RrnaAD	G3DSA:3.40.50.150:FF:000007 (FUNFAM); G3DSA:1.10.8.480 (GENE3D); IPR001737 (PFAM); IPR011530 (NCBIFAM); IPR029063 (G3DSA:3.40.50.GENE3D); PIRSR017269-1 (PIRSR); IPR001737 (PANTHER); IPR001737 (PROSITE_PROFILES); cd02440 (CDD); IPR029063 (SUPERFAMILY)	H	hypothetical protein Golomagni_02350 [Golovinomyces magnicellulatus]
aug-contig_119-processed-gene-11.13	MTEKPQTAGKVVSKNRASRAGTRSVASLTPEQLARKRANDREAQRSIRLRTKTRIADLEKRIRELSGEHDERVLEAVCKRNLELEEELKHLRHLSEALRKSENGANSSPESIMVPAIAAHRLTVEVQSSLGSWDDQQQQMVYLPPWNWNSRVPHEGTDIPPTFYGNENSEEIISGSYASPALGVLNHQSTPNQHNNTSEPISRHTTPAPIPIPGRGIPPLSARSNQVKSSSYPRNASSPSPVLRSISSAHYDANSSNLSFTSHPTDRILNFNHSTSSGTGTNGRSSGSGGVGVGNLLGLESTHTQSDTPTTDYSTPNSLPFLSQMQQSFCSWEISLPFHSPANAIESMLLGCLQQMRQFNSPNIKKPKKPWQPNIKGLIYPELRDEVQGTDLMLSDVIK…	548	Domain of unknown function (DUF3425)	#N/A	#N/A	#N/A	#N/A	DUF3425	G3DSA:1.20.5.170 (GENE3D); IPR021833 (PFAM); PTHR37012 (PANTHER); cd14688 (CDD)	#N/A	putative bzip transcription [Golovinomyces cichoracearum]
aug-contig_119-processed-gene-12.10	MEESLLLDFPNGECAPLPDSTIFSSEAEAFGWAQRQASTGGYAFSNLYKNKSKVTGDIILSCYNCDKGPKTYQNKPTTTSKSKQRDGTGSKKCGCQYKITIKPNESKKWVIIPKKSHNHGRNSSSIAHPAHRIAALQNTLRAEILNAANSGSSISQIMSAFREREGFNLIGKDISNIIQKERQKQLGGMTPLQWLLKELQDNGYNTRFETKDGNILSKLMYLHPQAIQLWKDHPDVLLMDCTYKTNRFNMPILNICGVTGGNKVIQLGLVFLSSEKENDYSWVLQQLKQIMTLEAIRAPLSIVTDRELALMKSLEAHFSDTPHLLCRWHVNMNVLAKSKKYFPKPTKKGNSYVRSPIFVEFLKQWNAVLAATSEETYKQEVAKLEAMAPKDAYIYVERT…	753	#N/A	#N/A	#N/A	#N/A	#N/A	#N/A	IPR018289 (PFAM); IPR052579 (PANTHER); cd07177 (CDD)	#N/A	hypothetical protein K3495_g3010 [Podosphaera aphanis]
aug-contig_119-processed-gene-12.27	MVGESDGVAENSQNNTTRQPNTTEQIAATGTVASVPMDKNLEIIRRLLKKLRNVYTGEGTVKDLPEEPDVAAAIKAFNIHKKEWEQCRAKSTPKEERMLALEEVVRKSLAEPAQKAGSSPVSGPPAQKTYASVVAPPMMKTAVRIRVEGAKDLQPAELLQRAKEHIPGAYAVRQMRSNDTEVYVQSASQRDTALNMAQPEGLKILRHDFPVEVCGVPLRTKIEGGKNANNNELITEIVNATKVRIPEFKINRIRWLHDGKEVERAKKNGRTRGSVVMSLPTETLQEQVVRHGIVINAMLYTAQVWSPRAQPKQCYNCSQWGHTQASCGKKAQCGECAGAHQTRDCPRKRVSCCNCGKEHRSWQRGACRTYQVYKGSVQKARLELLERTAEIRKEKVPTM…	473	Encoded by	F:GO:0003676; F:GO:0008270	F:nucleic acid binding; F:zinc ion binding	#N/A	#N/A	#N/A	IPR001878 (PROSITE_PROFILES); IPR036875 (SUPERFAMILY)	#N/A	AIR1 domain-containing protein [Blumeria hordei DH14]
aug-contig_119-processed-gene-12.30	MSNSGNKPKSPSLDPKCHRLKSPSDSGVQNEQISFTFPVADTEVELRHSKFSRYVAELQPLLRGSIPVILAYALQNSLQTVSVLIVGRLSPEALATASFSYMFAMSTAWLIALGGSTALDTLASSTFTGSNNPHDLGTLLQRAFIVLTAFYVPVAILWAFSTPVFRFFGQEEFICVESARFLTVLIPGGLGYIYFETMKKYLQAQEIMHPGTYVLLITSPVSACLNYIFVYTFNLGLLGAPMATGISYWLSFILLVLYTRCFNVSSCWGGWSRNCFINMTTFARLAILGVIHIGTEWWAFEIVALAAGRLGTISLAAQSVIMTTDQVMNTIPFGIGVAASTRVGNLLGARNAKGAAIAANAAAWLSIIVGAFVLAILMSVKNFYAKAFNDDIAVVKLTA…	512	MatE	P:GO:0055085; P:GO:1990961; F:GO:0015297; F:GO:0042910; C:GO:0016020	P:transmembrane transport; P:xenobiotic detoxification by transmembrane export across the plasma membrane; F:antiporter activity; F:xenobiotic transmembrane transporter activity; C:membrane	#N/A	#N/A	MatE	IPR002528 (NCBIFAM); IPR002528 (PFAM); PTHR11206 (PANTHER); IPR045069 (CDD)	V	hypothetical protein Golomagni_02619 [Golovinomyces magnicellulatus]
aug-contig_119-processed-gene-13.13	MNPSDPPPPYTSRLSYDNHNRGQTEDNISQASPSISTSARRSMEDEVRPLPAHWIRQFDTKSGHQYFVDTSRIPPRSIWHHPYDDTIYLSSLPQSERLQIENLSRTGNSSLGTSTISPSSVQTQRNEDYESLSGIQKFGRRFKDAILNSTHDERIEARKDRERMEIELYHQHQHIRAKMSEAVRTGKPQLIGKDGEGKDVWIDAPYKYNGNRGGNYPSLFGANLTVSGREFCGRNNHVFNPYGDGFSCDSDLRYARPQAPYHRPVGSRFGGGMGLPLGMGLAGGMIGGMMF	291	#N/A	#N/A	#N/A	#N/A	#N/A	WW	#N/A	#N/A	hypothetical protein Golomagni_04405 [Golovinomyces magnicellulatus]
aug-contig_119-processed-gene-13.15	MSYSFPYSDSESASSTDSFFSLKEAGTTKNDSKNVVQNKKLCNCFAMEERSALEILGSISPTDAKELLQLLNSQRLRETPNENDTKKFRKNITLPKWNGQSEDFEFYIGRLETRIERELAPFIESAAICLDMIDTLPEKKQSRVSDWFEESRSNENFSWQDLMKVFRREFENKEARQAASEIVSRMEQGKNQLFVDFLRDFEYRLAQSGGNETYTPLGKTQQLKASLNPRLRRSLIGVKLPSPKNYREWVAEVKEVAAELEAAPGYRARNAPETTTRIGMPKGGIVISEDNSNPKIDSDGDTVMGGTNALLAVIKDLVKDKEELSAKIKKKGVGKISNFNENPTVDPKDKRPRAPWRSAKVFQELREKGLCTRCTKAGHNCWKCPNFKQARRRKIELSA…	416	Integrase core domain	#N/A	#N/A	#N/A	#N/A	#N/A	IPR005162 (PFAM)	#N/A	hypothetical protein K3495_g11334 [Podosphaera aphanis]
aug-contig_119-processed-gene-13.18	MEESLLLDFPNGECAPLPDSTIFSSEAEAFGWAQRQASTGGYAFSNLYKNKSKVTGDIILSCYNCDKGPKTYQNKPTTTSKSKQRDGTGSKKCGCQYKITIKPNESKKWVIIPKKSHNHGRNSSSIAHPAHRIAALQNTLHAEILNAANSGSSISQIMSAFREREGFNLIGKDISNIIQKERQKQLGGMTPLQWLLKELQDNGYNTRFETKDGNILSKLMYLHPQAIQLWKDHPDVLLMDCTYKTNRFNMPILNICGVTGGNKVIQLGLVFLSSEKENDYSWVLQQLKQIMTLEAIRAPLSIVTDRELALMKSLEAHFSDTPHLLCRWHVNMNVLAKSKKYFPKPTKKGNSYVRSPIFVEFLKQWNAVLAATSEETYKQEVAKLEAMAPKDAYIYVERT…	753	#N/A	#N/A	#N/A	#N/A	#N/A	#N/A	IPR018289 (PFAM); IPR052579 (PANTHER); cd07177 (CDD)	#N/A	hypothetical protein K3495_g3010 [Podosphaera aphanis]
aug-contig_119-processed-gene-14.100	MMASKFEPRTPVNLAPPKTDPITTAALKKANGVDSELCYVAIKGKVFDVTGNKAYLPGGSYHVFAGHDASRALALTSTKVEDVRPDWEDLDEKEKTVLDEWMTFFSKRYNIVGQVQTDGAA	121	Cytochrome b5-like Heme/Steroid binding domain	C:GO:0005783; C:GO:0012505; C:GO:0016020	C:endoplasmic reticulum; C:endomembrane system; C:membrane	#N/A	#N/A	Cyt-b5	G3DSA:3.10.120.10:FF:000003 (FUNFAM); IPR036400 (G3DSA:3.10.120.GENE3D); IPR001199 (PFAM); IPR050577 (PANTHER); IPR036400 (SUPERFAMILY)	#N/A	putative steroid-binding protein 3 [Golovinomyces cichoracearum]
aug-contig_119-processed-gene-14.108	MFISSGILLWTNKYYSDYIIGAFHTFPEPVAKQLRKAIYYTNVDLKPSLALKYYKEAIRIGEELGVDRFSDEMMGIKVQIAILFEKCEKYPKAIEVLEAVRSDNLKWLEVVGFRQGWEARRNKVLRKTVQISVKLGDLYSNIHVLEQGLAEERLTWAVEETLREQQRRMKEGIKEDEGSWFDEDEIGSQFETLAHMHEEKNRHYLSAPLFLQALNLSPPRSCHTVVLMNNLAASLVQQVPTASNPALPDARESLISNATKFAEKAIALAGMIQPPERNDECDTGCTVATFNLAEIAEMSGDLINARKKYEEAAEMAKGIGFKAGLKKSRIALKRIEKQIEEKTSKATNVI	350	Tpr domain-containing protein	P:GO:0006515; F:GO:0005515; F:GO:0051787; C:GO:0031942	P:protein quality control for misfolded or incompletely synthesized proteins; F:protein binding; F:misfolded protein binding; C:i-AAA complex	#N/A	#N/A	#N/A	IPR011990 (G3DSA:1.25.40.GENE3D); IPR040201 (PANTHER); cd24145 (CDD)	#N/A	hypothetical protein Golomagni_04011 [Golovinomyces magnicellulatus]
aug-contig_119-processed-gene-14.99	MAKASAENSSPADPGGQLHPSLLGIAAAMEKSENEHRQRMSLAQEFLGIIDAWAKTKAETEEAALVAPFIDRTAPIVIVMTIGTANTHESPCKTLNPNTSTMTTAGPRVTKSVENVHHTLPKRPQQDLSPWVTVSLGHYSTKGSEVTKPNCIPHTTEADFAANVDDIKYSERRQTDFSPLGRTTRVAEVISIRSGSAIECVSDALRDSILSASSLLKAEEATIEPASNWVSIIVPRVPIHIRTLQGTVLVTNEIVANECFTMCGAMPEKVRPTKAKLGRFSSSWLINFKQKPAKLGFRLFHESGPAFPFSRRRPIEQCQRCWGFHSTRSCTKAQCCKRCKGSHESTECQVTIPKCANCSGPHESTELNCMARPQRQNGVIVPRTTAESRIIRERGTLDF…	425	#N/A	#N/A	#N/A	#N/A	#N/A	#N/A	#N/A	#N/A	putative eka-like protein [Erysiphe necator]
aug-contig_119-processed-gene-15.124	MNTKGFDFALKSIIKCSKTSPSSRSCSFLRYGKLSSPLLKARTISHTRASYSLPSRQPGRYDPIEAQRAKPLVTGNQISNILTHRYAKYIYVFIAGGAVIFYVKHLETAPVSGRRRFMYFTDADAEEEGRILYKNVMQEFRHSILPPWDQRTQQVNRVMKRLIAANGLAHIEWEVNVISSNASNAFVIPGGKVFVMSGILPIAQTDAGLAAVLSHEIAHGIASHQAESMSSSIMIIWPLRVLFFFFFDIWSIGILGNVILELGINRPASRTQEREADFIGLIMMAKACYNPKAAVNFWRRMEMSEAAQGKKDFPWLSTHPSAASRAELINKWLPIAEAVREETNCPITRRYTDRFKPTIDYYWPPINKDRGIFF	374	Peptidase family M48	P:GO:0006508; P:GO:0006515; P:GO:0034982; P:GO:0051603; F:GO:0004222; C:GO:0005743; C:GO:0016020	P:proteolysis; P:protein quality control for misfolded or incompletely synthesized proteins; P:mitochondrial protein processing; P:proteolysis involved in protein catabolic process; F:metalloendopeptidase activity; C:mitochondrial inner membrane; C:membrane	#N/A	#N/A	Peptidase_M48	G3DSA:3.30.2010.10 (GENE3D); IPR001915 (PFAM); IPR051156 (PANTHER); cd07331 (CDD)	O	Mitochondrial metalloendopeptidase OMA1 [Golovinomyces cichoracearum]
aug-contig_119-processed-gene-16.134	MQDFSTNTNLSQDQGPSRQTNPTLLPSHLWNLPYITHSPEILEAATKQDGERVSQLFASSIAPTTITTPIPIISSPQTRIHLPIQPITPYDGTPRNLRSFCSQLVNQIPPDNSISETEKVRFAYQCLGTGALAKMRSSFRCLENPSLPAEITTLEEFLAALKQRCEDPSLRDQATTTVEGLFQRNTKFHEFITIFEDNMVDSIYSTVDKSHWKLVLERRLSSRLRNLILSASDVPSEYHAFVAYLRQKDAGLQEILATSGVISSRPTVQFNNLPIPSPNLVRPVTRPSNFELPVSQGGSAMDLDLVSRQKGADGRLTQQAKDARRTLGRCVWCNKLGHTVRDCPLGSRSVASIAVQEIPTNNQVEELKGQLQQ	373	Retrotransposon gag protein	F:GO:0003676; F:GO:0008270	F:nucleic acid binding; F:zinc ion binding	#N/A	#N/A	#N/A	IPR001878 (PROSITE_PROFILES); IPR036875 (SUPERFAMILY)	#N/A	hypothetical protein EV44_g4484 [Erysiphe necator]
aug-contig_119-processed-gene-16.143	MPATIETTIKWCEDSAIKYKNSRLQDEELWEIAYDDLNEAIATGVVDIESLKPTSDYKTALMDLRGVLRRNGVYICRKAGKKVTECFSEFLRTSANGTVPVWPLASLQSLINSEVTSITDISLGLQYLCRQNSIIKRESGNNAFTTKMENQIDNNNLENPSPIITPSSINQPISSSSTNDLPRILGNILRMYQVDDKKYGGWDDSLDYKMEMYKDICDINQCPANHRIDGLMLALKEPALSEFRSHRHDAGMTFEGMIKHLRECYEDPSQRSDDAMHTLLTNACWGIAEFQSALSAPSPHLSTFINQLKMAVSNYHAIMKEPISTYIAESYLEDNEKSPEVNFTNRRFKDNYRSRGGSRSGYRNKGLISTSRESTHDVTVNSRNRPGLFNFGNKCYVCG…	1582	ADO33890 polyprotein Pyrenophora tritici-repentis	P:GO:0015074; F:GO:0003676	P:DNA integration; F:nucleic acid binding	#N/A	#N/A	RVT_2,rve	IPR013103 (PFAM); IPR001584 (PFAM); IPR036397 (G3DSA:3.30.420.GENE3D); IPR036397 (G3DSA:3.30.420.GENE3D); IPR050951 (PANTHER); IPR001584 (PROSITE_PROFILES); IPR012337 (SUPERFAMILY)	L	hypothetical protein DID88_002715 [Monilinia fructigena]
aug-contig_119-processed-gene-17.169	MAGEDSCVAKIGTKNSSLHQKSTATPAAKEAATNPIMNPNLEIIRTLLKKLRKVYLKEEVEDDFDITSKDINEAIKAFNNHKKAWENMQAKTSPIEERMLALEEVVKKSLAVPARKAGPNTVSRAAAQKTYASITAPPMAKTAVRIRVEGAKNLQPTELLTKAQEHIKGACAVRQLRSNDTEVYVQSASQQDTALRMVEPKEFKILKQDYPVEVMGVPLGTMIQRGKETDNFRIIYQIQEATKARIPGIKITRIKWLHDGKEHQWSQKNGHTRVSVIVSFPTEIIQREVVKNGIVINAVLYTTQLWSPRAQVKQCFNCNQWGHTQASCNKAKRCGECAGAHQTRDCPKKAVSCCNCGKAHRSWQKGSCPNFAKYKANILRARYELLERTMDIRRIMEDK…	478	Encoded by	F:GO:0003676; F:GO:0008270	F:nucleic acid binding; F:zinc ion binding	#N/A	#N/A	#N/A	IPR001878 (PROSITE_PROFILES); IPR036875 (SUPERFAMILY)	#N/A	hypothetical protein K3495_g991 [Podosphaera aphanis]
aug-contig_119-processed-gene-17.179	MGVKKYAFVPMQDEDLGPARVVEKKRDKHLHRSRKLLSNEGNSKEESGRSRSSSRNRVVKYSSNAKARRRSINDAQFLERWGDEEKASSVEPEFHESAPKRIKTTHQHDSEDDLDEEERERRRDQREKEEFAKRLASKDADKTKKLVEDRSSAKQGSILAQRRALAEDAALRTAALPDLRERSRQEYLKKREAERLALLRKQVDEETEELRSGVPLSEKEKAEFSKNREVLRIAEERLRIDDHLDGYSMPEDYITEKGKIDRKKKEEAMYKRYIERDEYGQEKFITEHEEWENDQIAKAKAQIQISEPVNRNYDYVLDEQQGIKWVMDSRLPGEMNNMSKEDRFLAEKIKAAEMKALSIEETRKSLPIYSYREQFLAAIAEYQVLVIVGETGSGKTTQL…	1007	Helicase associated domain (HA2) Add an annotation	F:GO:0003676; F:GO:0003723; F:GO:0004386; F:GO:0005524; C:GO:0005622; C:GO:0071013	F:nucleic acid binding; F:RNA binding; F:helicase activity; F:ATP binding; C:intracellular anatomical structure; C:catalytic step 2 spliceosome	K12813,K12814	map03040	DEAD,HA2,Helicase_C,OB_NTP_bind	G3DSA:3.40.50.300:FF:000007 (FUNFAM); G3DSA:1.20.120.1080:FF:000001 (FUNFAM); G3DSA:3.40.50.300:FF:000726 (FUNFAM); IPR011545 (PFAM); IPR048333 (PFAM); IPR001650 (PFAM); IPR027417 (G3DSA:3.40.50.GENE3D); IPR011709 (PFAM); G3DSA:1.20.120.1080 (GENE3D); PF21010 (PFAM); IPR027417 (G3DSA:3.40.50.GENE3D); PTHR18934 (PANTHER); IPR001650 (PROSITE_PROFILES); IPR014001 (PROSITE_PROFILES); cd18791 (CDD); I…	A	Pre-mRNA-splicing factor ATP-dependent RNA helicase-like protein cdc28 [Golovinomyces cichoracearum]
aug-contig_119-processed-gene-17.187	MTTETPAKEEVPNIPGTLLEYPSERDKRAKDREERSREIESRTEEWGNGIDPDKYSPSQLNQYALWRLTNYQNRERIFDKKMDTEYLFNEFWEDFNTFELSHFKMLTRDVVRPLRHFLRDHGVWIRNERTYSTAKSLYDCTRSEKNIWLDEGHDSENPFAERNENDTKDSTNSNNTKTEPISFCPAKYNQLQKHSEPHQNHKDIANLTRTYNDEVKYSGETSDNFDDKFNIFMDYCTRFGIPSQALHDAFPCMLKGMALTFYYNKCRGESIQNLQTLMKSNFEGPEYQRFNLKRWNELTFQNIIDSNPDKNPMEQITILTITLDKMQKTLSSEWQSEAVMHNKIVSACKDVEACKMACYRPSQTVSGLILDLRSGVEIHNKPLATSSTTTYHSESPEET…	1397	Encoded by	P:GO:0015074; F:GO:0003676	P:DNA integration; F:nucleic acid binding	#N/A	#N/A	RVT_2,rve	IPR036397 (G3DSA:3.30.420.GENE3D); IPR013103 (PFAM); IPR050951 (PANTHER); IPR001584 (PROSITE_PROFILES); IPR012337 (SUPERFAMILY)	L	hypothetical protein EPUL_006805, partial [Erysiphe pulchra]
aug-contig_119-processed-gene-17.189	MSYSFPYSDSESASSTDSFFSLKEAGTTKNDSKHVVQNKKLCNCFAMEERSALEILGSISPTDAKELLQLLNSQRLRETPNENDTKKFRKNITLPKWNGQSEDFEFYIGRLETRIERELAPFIESAAICLDMIDTLPEKKQSRVSDWFEESRSNENFSWQDLIKVFRREFENKEARQAASEIVSRMEQGKNQLFVDFLRDFEYRLAQSGGNEAYTPLGKTQQLKASLNPRLRRSLIGVKLPSPKNYREWVAEVKEVAAELEAAPGYRARNAPETTTRIGMPKGGIVISEDNSNPKIDSDGDTVMGGTNALLAVIKDLVKDKEELSAKIKKKGAGKISNFNENPTVDPKNKRPRAPWRSAKVFQELREKGLCTRCTKAGHNCWKCPNFKQARRRKIELSA…	416	Integrase core domain	#N/A	#N/A	#N/A	#N/A	#N/A	#N/A	#N/A	hypothetical protein K3495_g11334 [Podosphaera aphanis]
aug-contig_119-processed-gene-17.190	MWLPSLLVVLLCFLHTVACAEDYYELLGISREATNTEIKRSYRQLSKRNHPDKNPGNEEAKQKFVKVAEAYEALSNEETRRIYDEYGHEGIEQHKQGGGRAEYHDPMDLFSRFFGGSNSFGNQGQRRGPDMEVQIKVPLKDFYNGHKTEFTIEKQHICDKCDGSGSANGKVETCKSCSGNGFQVKRHMLAPGLYQQIQVTCNDCRGQGKTIKHKCPVCNGHRVVRRSATFSLVIDRGAPNGAVVHYENDADESPDYEAGDLHVTLVETEPSLDENNELRVDGTFFRRRGDDLHWKEVLSLREAWLGSWSRNLTHLDGHIVALSRARGEVVQPGHVERVVGKGMPKWNENGDSVYHSTEFGDLLVEYTVVLPDQMENDMEKDFWNLWEMWRSRTGVDLQK…	416	DnaJ central domain	P:GO:0006457; F:GO:0030544; F:GO:0031072; F:GO:0051082	P:protein folding; F:Hsp70 protein binding; F:heat shock protein binding; F:unfolded protein binding	K14002	map04141	DnaJ,DnaJ_C,DnaJ_CXXCXGXG	IPR001623 (PRINTS); G3DSA:2.10.230.10:FF:000001 (FUNFAM); IPR002939 (PFAM); IPR001305 (PFAM); G3DSA:2.10.230.10 (GENE3D); G3DSA:2.60.260.20 (GENE3D); IPR036869 (G3DSA:1.10.287.GENE3D); G3DSA:2.60.260.20 (GENE3D); IPR001623 (PFAM); IPR044713 (PANTHER); IPR001623 (PROSITE_PROFILES); IPR001305 (PROSITE_PROFILES); IPR001305 (CDD); cd10747 (CDD); IPR001623 (CDD); IPR036869 (SUPERFAMILY); IPR008971 (SU…	O	DnaJ-related protein spj1 [Golovinomyces cichoracearum]
aug-contig_119-processed-gene-18.10	MSLHLRSCQPIRSARATAALLSPLSNQRRYAWFWDRFKKRSQESSGQTVISNPLTEEYLTRKPSPPKLVQGGLAESSILEDEEIVGPKPKAVESKDGQVETLVRNPASMAAVLDPAPEARRRWERKMVIRDIRKRGRLTKAQQIKRTEREIVSKSHDFKTSVKKLVHLANQIKGKSLEDAIIQMRFSKKKVAKDVKEHLEHSKNEAIVRRGMGLGYSARNEFTPITIMTNDKKRVKVTDPTTIYVDQAWCGKGLYEKTPDYRARGRMNIMRNPTTSITVVLKEEATRIRIHKERETREAKKKTWVQLPNRPIISQRQYYSW	321	Belongs to the universal ribosomal protein uL22 family	P:GO:0006412; F:GO:0003735; C:GO:0005840; C:GO:0015934	P:translation; F:structural constituent of ribosome; C:ribosome; C:large ribosomal subunit	#N/A	#N/A	Ribosomal_L22	G3DSA:3.90.470.10:FF:000017 (FUNFAM); IPR001063 (PFAM); IPR036394 (G3DSA:3.90.470.GENE3D); IPR047867 (PANTHER); IPR001063 (CDD); IPR036394 (SUPERFAMILY)	J	hypothetical protein Golomagni_01697 [Golovinomyces magnicellulatus]
aug-contig_119-processed-gene-18.16	MVKFYESAFKYDYSFPAVTLAYFLRYPNPYSTHVLSTDVISRDIDLQGRLHTVRVHRKRTRLPSAVLKFLPKSVLGSLSNSSSESFILERSTVDIKEGWMRTESKNLDWTGIISVVEKQEYRRQVSIASGEQVNTNDLSTPSAGKTDVVTTVIFRSRLGSRLRAKASRTAGDISTGVSEIEDEQPKKGFLASLSTYGVQRSIEAIASHRTENQLGKSKEGMVVVLERLRSGGLMAVLDGMRKDREIAMAPPI	252	PRELI-like family	C:GO:0005758	C:mitochondrial intermembrane space	K02619	map00790	PRELI	IPR006797 (PFAM); IPR037365 (PANTHER); IPR006797 (PROSITE_PROFILES)	U	putative msf1 domain protein [Golovinomyces cichoracearum]
aug-contig_119-processed-gene-18.3	MANPVQKFQVTKAPSGPSPVTPEQRYWKGFRSPLNIPFQSPVTHLSFTPPSTNSHLPSNDDYFVATSGARLQIYSIRTRKLVKIISRFTDIAHSGEIRRDGRIVVAGDETGKIQVFDVQSRAILKTWEEHKQPVWTTKFSPVTLTTLMSTSDDYTSRLWDLPSGESTIKFTGHTDYVRSGSFMPGTLSNLILTGSYDNTVRLWDPRTPERATMTFKHSAPVESVLSMPSGTQIAAAAGNQISILDVVAGKPLQILKNHQKTVTSLCLASNGTRLVTGGLDGHVKIFETVGWNNVYGTKYSSPVLTVNVVNTGASKEDKHLVVGLQSGIMSVKTRLSGQEKVKQREREKEMQALVEGTLEKHDRKTKKRTRGLDKFSKRISFAGEGAEVVIEGQEQRRQK…	532	UTP15 C terminal	P:GO:0006364; P:GO:0045943; F:GO:0005515; C:GO:0005730	P:rRNA processing; P:positive regulation of transcription by RNA polymerase I; F:protein binding; C:nucleolus	K14549	map03008	UTP15_C,WD40	IPR020472 (PRINTS); IPR015943 (G3DSA:2.130.10.GENE3D); IPR015943 (G3DSA:2.130.10.GENE3D); IPR001680 (PFAM); IPR018983 (PFAM); PTHR19924 (PANTHER); PS50294 (PROSITE_PROFILES); IPR001680 (PROSITE_PROFILES); IPR001680 (PROSITE_PROFILES); PS50294 (PROSITE_PROFILES); IPR001680 (PROSITE_PROFILES); cd00200 (CDD); IPR036322 (SUPERFAMILY)	#N/A	U3 small nucleolar RNA-associated protein 15 [Golovinomyces cichoracearum]
aug-contig_119-processed-gene-18.4	MPDPVTEDGWLALAEEAKRTACDLENRIEVVELYKRAVAIQPCSNKIWLAYCEWVWSLYNQCKASDPEWTEEERSLGQEIFNMQVVIDLWQQGTQATRYRLNDSHELWNRYISIELDALSDSPTDEQIQNIKILFTERLKIPHATWDETSQMFSTFLSKYRESDWESTMVEVTKISKDAKIQYSQREPYEVKLQRAVESGDPGAIKSQFLDYLNWEQGQTLKISKKGSNLSSVNLCVALFERALTSAQLAKDPVVWEDYIIVLLDIKNSSNSSVELPLILSICHRATKNCPWSGALWARYILCAEVEPLPFSSIEQIKHAATNTGDLDRDGINDVVLFYVAWCGYLKRRTLVEGATDEDFDLVEMGLPTALEDVRLWGKRRYGKAWKGDPYFRIENILI…	1034	Occluded RNA-recognition motif	F:GO:0003676; F:GO:0003723; F:GO:0005515	F:nucleic acid binding; F:RNA binding; F:protein binding	#N/A	#N/A	Lsm_interact,RRM_1,RRM_occluded	G3DSA:3.30.70.330:FF:000365 (FUNFAM); IPR012677 (G3DSA:3.30.70.GENE3D); IPR012677 (G3DSA:3.30.70.GENE3D); IPR012677 (G3DSA:3.30.70.GENE3D); IPR000504 (PFAM); IPR011990 (G3DSA:1.25.40.GENE3D); IPR011990 (G3DSA:1.25.40.GENE3D); IPR012677 (G3DSA:3.30.70.GENE3D); IPR031766 (PFAM); PTHR24012 (PANTHER); IPR000504 (PROSITE_PROFILES); IPR000504 (PROSITE_PROFILES); IPR000504 (PROSITE_PROFILES); IPR000504 …	A	putative RNA-binding protein [Golovinomyces cichoracearum]
aug-contig_119-processed-gene-18.9	MQYGGASDDFDLCLKIFYDQCRKAGVPSTLYGEAFSIMLKGKAREFYYDRVAGHNYQFQAMIAQIQQHFETHERRQQMLQTWNTLTLSKFIDQYPEKPVAQCFELLLEQMHKTQRGLAREYQTDSMIRDNLINACRDVKECAFACFKPSSTLETLCADIHSAIGTSVRIKNNNKASIYNAINEDEETFYTDRKYHGRPRYQHSNSYSPYKIGQKLDGYRTKKCFVCHKTGCWSTNHSQYDRDKAIFEFKKRMQDRGTPFSNTKFQQFITEFEGMDDQENQNQDYIEDHAIEAMIADMILDENPGQVPENAVTTHYITDFGEVDGLKTLTVLRNQATSHAITCKSPISSFIIKQRYSDSTFQGIIIDTGAAKWSTADRGQFKALQRLQKVKLDTSKAGQV…	1436	Reverse transcriptase (RNA-dependent DNA polymerase)	P:GO:0015074; F:GO:0003676	P:DNA integration; F:nucleic acid binding	#N/A	#N/A	RVT_2,rve	IPR036397 (G3DSA:3.30.420.GENE3D); IPR013103 (PFAM); IPR050951 (PANTHER); IPR001584 (PROSITE_PROFILES); IPR012337 (SUPERFAMILY)	L	hypothetical protein K3495_g12144 [Podosphaera aphanis]
aug-contig_119-processed-gene-19.117	MAGFEVAPHELRSNPSNSSNFVEESLGPSEFVTQDVSKYGIGEHCISDRPTPISQGPRGKISKLNGIDVYITKPINKSASPIKFLLFLTGATGLHSVNNQIQADKFADEGFLVILPDMFPNDPLPGSATYQEEKDPTIIEQMKFRIAETVKSFLIDMWLARQTPEKVVPIIRKVIDAAKTEFSEVIANGDGIYSVGFCFGGRLILLLAKEGSNYLLPIPRTQRPDDEESSLGDRSPLIKAGAICHATQIAKADFENVKSPLCFICVENDQLFPEEVRMYGEQSLKFDKVDCEFKTYAGVPHGFAVFGEYEDEKIREAQEEAFIQILSWLKRN	332	Dienelactone hydrolase family	F:GO:0016787	F:hydrolase activity	#N/A	#N/A	DLH	IPR002925 (PFAM); IPR029058 (G3DSA:3.40.50.GENE3D); PTHR17630 (PANTHER); IPR029058 (SUPERFAMILY)	Q	Hydrolase tropI [Golovinomyces cichoracearum]
aug-contig_119-processed-gene-19.118	MKLPEGQNERVFRVLERYKTRLQNANLIFPASEAPGELRQSSNIRDTARAKNLPAGTLCVYSDGSSSGPAVSSYGYAVYKNGEILASGGKLLLGAEVYDAEIAGAIQGLETALEIGDSTDIKVLLDNQEAAETLGSGRTSSSLQAVRKFKELCSTHPTIEVRWIPGHSGIYGNEKADKLAKRALATIIRDRNSPTSEDVCREHQNIFIFAALKRQVTISTQKLVEEWWLNNKMARYEDLDLLMRRKRSPELDLPRWAYYRLIAARTEHGDLASYHRHFQHLNEEFMCKCGREKRPWHFVESRPAIQKWQTETKESRPRTRDMIGQEGWQVFWRFLTVTKCYSNSEI	346	Ribonuclease H protein	F:GO:0003676; F:GO:0004523	F:nucleic acid binding; F:RNA-DNA hybrid ribonuclease activity	#N/A	#N/A	#N/A	IPR036397 (G3DSA:3.30.420.GENE3D); IPR002156 (PFAM); IPR002156 (PROSITE_PROFILES); cd09276 (CDD); IPR012337 (SUPERFAMILY)	#N/A	hypothetical protein K3495_g12441 [Podosphaera aphanis]
aug-contig_119-processed-gene-2.20	MSEIVLHLRSEVGKKQERRSALTPATTKSLIQAGYVVNVERSPQRIFDDAEFEEAGATLVPENSWVEAPGDHIIIGLKELPSEGDTSQIPLKHTHIQFAHCYKQQQGWDKVLCRFWRGGGTLLDLEFLVDDNGRRVAAFGYHAGFAGAALALKVWAWNLSHPNTEPLPAISCYVNEEELITDIKSCVSNGKEKSGRMPRVIIIGALGRCGKGATTLCQKVGISGENLIEWDMAETAKGGPFMEIVQSDIFINCIYLSSKIPNFVDKESLNVPDRKLSVICDVSADTTNPFNPIPIYNKATTFSEPTVLVDVPSEPSLSVISIDHLPSLLPREASEAFSHDLLPSLLQLKNRKDSPVWIRAEKLFQEKIATLPEAYS	376	Belongs to the AlaDH PNT family	P:GO:0009085; P:GO:0019878; F:GO:0004753; F:GO:0004754; C:GO:0005737	P:lysine biosynthetic process; P:lysine biosynthetic process via aminoadipic acid; F:saccharopine dehydrogenase activity; F:saccharopine dehydrogenase (NAD+, L-lysine-forming) activity; C:cytoplasm	K00290,K11874	map00300,map00310,map01100,map01110,map01130,map01230	AlaDh_PNT_C,AlaDh_PNT_N	G3DSA:3.40.50.720:FF:000217 (FUNFAM); G3DSA:3.40.50.720 (GENE3D); IPR007886 (PFAM); IPR027281 (PIRSF); PIRSR018250-4 (PIRSR); PIRSR000183-2 (PIRSR); PIRSR000183-3 (PIRSR); PIRSR018250-1 (PIRSR); PIRSR018250-3 (PIRSR); IPR051168 (PANTHER); IPR027281 (CDD); IPR036291 (SUPERFAMILY); SSF52283 (SUPERFAMILY)	E	hypothetical protein Golomagni_02771 [Golovinomyces magnicellulatus]
aug-contig_119-processed-gene-20.108	MAQICTLHEAGYSRKYIVEFLGVTLGQVAYTLRSGHLSPKKNKGASPKLNTTQVDELEDFVGSSHETRQISYLDLASNFPNWNVGEAIKIALTKRGYPRCFSRNKSPLSEENKRGVSARHGLRLIFTIARKTGRSSFGAMKLGSMTGRLHPNSSLKRSAS	160	#N/A	#N/A	#N/A	#N/A	#N/A	#N/A	#N/A	#N/A	hypothetical protein GcC1_014017 [Golovinomyces cichoracearum]
aug-contig_119-processed-gene-20.94	MGKYGGTVLTGQDNFTLWQTNLEIELAAVRLKKFLRHDKCITPTRQNLKNTRSNDDDNFENELEEWEFQHAQALKIILQSVDNTNRVIIQSCQTASSAYETLVKRYNMKNTARLAQLLSQLFSIQFMKEVDVVEKYDLIINLCSQITDQQPDASISEIVQAVILMRSLPSEFDTTLEILTNKNTFPTLEDVFQAAKSTETRLADPEISTELQIANSVSKPLRNRLKVCWVCQGNHVKSSCPKWLATQEGSDFKKSGLKWHQWRVSKNNSQGANAVNLKNEVVDCNPVSSFDNDSEFEKSTYLCAAANSDPKLNWGLDTMCSCHLTPRKDAFVGKIMPTRVAIEVADGTTIYSEGKGDVRIFWKSSTSSHLLRSTILRGVLYVPDASISLISLGALVEKG…	1351	transposition, RNA-mediated	P:GO:0015074; F:GO:0003676	P:DNA integration; F:nucleic acid binding	#N/A	#N/A	#N/A	IPR013103 (PFAM); IPR036397 (G3DSA:3.30.420.GENE3D); PF14223 (PFAM); IPR054722 (PFAM); IPR039537 (PANTHER); IPR001584 (PROSITE_PROFILES); cd09272 (CDD); IPR012337 (SUPERFAMILY); IPR043502 (SUPERFAMILY)	#N/A	hypothetical protein K3495_g7973 [Podosphaera aphanis]
aug-contig_119-processed-gene-21.73	MSDLFTELTAPNGKKYTQPLGLFINNEWVKSRDGKKIITINPTDESEITSVYAASAQDIDVAVAAARKAFEDPSWRDLQSSDRGSLMLKLSDLIKKNADILATIETWDNGKTYNSSLSDIRSVVNVLRYYGGYADKIHGQVIDAGPEKFAYTIKEPIGVCGQIIPWNFPMLMAAWKLGPALACGNTVVLKAAEQTPLSALYMCNLIKEAGFPPGVVNIVNGYGREAGAAIATHPDVDKIAFTGSTVTGKEIMKMASGTMKNITLETGGKSPLLVFADADLEQAVKWAHIGIMSNQGQVCTATSRILVQESIYDSFLASFKKQVQKVSVVGDPFTEGTFQGPQVTKAQYERVLGYIKAGKEEGATLVSGGETSSENVPSGKGFFVTPTIFTGVRPHMKIF…	500	Aldehyde dehydrogenase family	P:GO:0006598; F:GO:0004029; F:GO:0016491; F:GO:0016620	P:polyamine catabolic process; F:aldehyde dehydrogenase (NAD+) activity; F:oxidoreductase activity; F:oxidoreductase activity, acting on the aldehyde or oxo group of donors, NAD or NADP as acceptor	K00128,K00129	map00010,map00053,map00071,map00280,map00310,map00330,map00340,map00350,map00360,map00380,map00410,map00561,map00620,map00625,map00903,map00980,map00981,map00982,map01100,map01110,map01120,map01130,map05204	Aldedh	G3DSA:3.40.309.10:FF:000012 (FUNFAM); G3DSA:3.40.605.10:FF:000011 (FUNFAM); G3DSA:3.40.605.10:FF:000026 (FUNFAM); IPR015590 (PFAM); IPR016162 (G3DSA:3.40.605.GENE3D); IPR016163 (G3DSA:3.40.309.GENE3D); PIRSR617656-1 (PIRSR); PIRSR036489-3 (PIRSR); PIRSR000197-1 (PIRSR); PIRSR036492-1 (PIRSR); PTHR43720 (PANTHER); IPR016161 (SUPERFAMILY)	E	Aldehyde dehydrogenase [Golovinomyces cichoracearum]
aug-contig_119-processed-gene-21.76	MKTHDPRYTGKFMGWIQSGWAKIMRVTRVFHEVACRNNVKERLVPDHSKIGGNEEADGVARSALSSLPARHLQLSQINKAYFRRLMHQRQQELIDKWWSTACPDRYLDLDLQMRRRKPPELNLPRHLLHRLMAARTGHGAYNSTSSRVLEHETSTLPIEIYLKQRRIQHAGSSEKQPAQQTLRFALENIKLSACGRNTVRATNERNDLAEWRKISGIEENTKKQKEMLKIAAFQQWEHAWNNHAPKADVSHRAPADPIKWHATNIKTDEKTNRLRMNHTGTPRAIHQLLTRAQSSIAIQIRSEHIGLNAYLYRRKVPEVDEPRCPLDKGKRRRLEKAKNRTLEAIMESPEDIGRITKWIQGEGYIEQFRLTREVEAAAEKRGIQIVDPVKDSNSKYTGK…	3701	Endonuclease-reverse transcriptase	F:GO:0003676; F:GO:0003824; F:GO:0008270	F:nucleic acid binding; F:catalytic activity; F:zinc ion binding	#N/A	#N/A	#N/A	IPR001878 (PFAM); IPR000477 (PFAM); IPR036691 (G3DSA:3.60.10.GENE3D); IPR005135 (PFAM); PIRSR604808-2 (PIRSR); PIRSR604808-3 (PIRSR); PTHR33481 (PANTHER); IPR000477 (PROSITE_PROFILES); IPR001878 (PROSITE_PROFILES); IPR000477 (PROSITE_PROFILES); IPR001878 (PROSITE_PROFILES); cd01650 (CDD); cd01650 (CDD); IPR036691 (SUPERFAMILY); IPR043502 (SUPERFAMILY); IPR036691 (SUPERFAMILY); IPR043502 (SUPERFAM…	#N/A	hypothetical protein K3495_g12178 [Podosphaera aphanis]
aug-contig_119-processed-gene-21.79	MNLENSAPVKEPRKLLTRDQCIEIRTLKRFGLTLQAITNELGLTVRQVQRACARNDENPSSRKGRSQILSSEQVDEIEAFVRESPKTRQMSYLELAMGPFSHRGYSEQLISNALKKRGYSRCIARKKAPLSTVNKQKRLEFAQLHLDWSEEQWS	154	DDE superfamily endonuclease	P:GO:0006313; P:GO:0015074; F:GO:0003677	P:DNA transposition; P:DNA integration; F:DNA binding	K00846	map00051,map01100,map01120	DDE_3,HTH_23,HTH_Tnp_Tc3_2	IPR002492 (PFAM)	#N/A	hypothetical protein K3495_g12757 [Podosphaera aphanis]
aug-contig_119-processed-gene-21.81	MSQRLPAPHPASRSPPDDGRRIALPPVQSRDDFHYRTDLPDLQPPVSDKRIRDYQIHQIPSRQIQPKVRGVDGDLGVHSILNPDVPIGSKTSSRSPNDHVESMSRNPNLRIKSNSQNMISSQQELAPNTLSPIENTSRCQIWASRRILTPKSPLRCTSSSKVASAGAPDTGGSPISAPSKQIQNQGIGPISNQNSPFIKDSLVVKQQIPNQQFSQSFSCPTLEGISGSSSSHRPTPNSIASKLNPATSENLPYVPLKSQTLSVTAPNQSGHPSPKKSYALSGMSSGNSSKQIGDLNKWSRNPEGPYVTPGSSQNCSSASFSRQTSASDPIHVLTVTTNQGLFNIPVDVHHASRLAGEKRARNAGASARFRQRRKEKEKEACSAIEKLESQVRDLETRLE…	549	#N/A	P:GO:0006355; F:GO:0003700	P:regulation of DNA-templated transcription; F:DNA-binding transcription factor activity	#N/A	#N/A	bZIP_2	G3DSA:1.20.5.170 (GENE3D); IPR004827 (PFAM); cd14705 (CDD)	#N/A	putative transcription factor bzip [Golovinomyces cichoracearum]
aug-contig_119-processed-gene-22.115	MASGGVFGGFGQTQQNQQPQQSLSLFGTLGQSTQNQQQGGGLSGGLSSDQRNYSSQLGTSQFGALGQSNQLQQQNSTAFGQSQPSQQLQPLLQLGKSGIWQPNSSLKERSIPEQMEAVVEKWNSVSPNCAFKYYFYNKVDDNMAPYYRPGVNEDPKAWNEALSKKPDKGYIPVLCVGFAQIGERIKLQQRNLANFNARLHEINSSLSQMMRDHETRNSIKALDARRKHVVLKQRCLALATKVQVLRNRGYALGGDEEDLKIKLLALERQVNDPALGARGEEIWARMVAVQERAKFLNQETRKAGLEATNPMDEEFTRRAKKILEDYHTQLVHLSSELDSIKHDYEEWLNDPTHPKPHLGKDGPSNINVRRPLNFK	375	Nucleoporin complex subunit 54	P:GO:0006607; P:GO:0006999; P:GO:0036228; F:GO:0017056; C:GO:0005643; C:GO:0044613	P:NLS-bearing protein import into nucleus; P:nuclear pore organization; P:protein localization to nuclear inner membrane; F:structural constituent of nuclear pore; C:nuclear pore; C:nuclear pore central transport channel	K14308	map03013	Nucleoporin_FG,Nup54	G3DSA:1.20.5.3600 (GENE3D); IPR025712 (PFAM); G3DSA:1.20.5.490 (GENE3D); PF18570 (PFAM); IPR024864 (PANTHER)	UY	hypothetical protein Golomagni_01351 [Golovinomyces magnicellulatus]
aug-contig_119-processed-gene-22.120	MFQNIACILDNAADTEHLPLHLIKPFRNFIEDLIGVARRHFESHVTGSTWPPSPYSATHINVKKQTLANMINNRPTPPQAAALPAKPQTIATVLTTAPQLRQQRPQQARISKPALAPVAKEKQAWEDNRLFARIPPGHPSLSMSPYATILHLNAFLKEKLIREIQITKTGFAICPVSLSTHEVLIARMGELEAFLSNKGECKLERPTNHSAYLLPGIPHSYAGYNGNTIERIEITPSIIS	240	Encoded by	#N/A	#N/A	#N/A	#N/A	#N/A	#N/A	#N/A	hypothetical protein K3495_g15551, partial [Podosphaera aphanis]
aug-contig_119-processed-gene-22.129	MPGRRRTPGTEAQRAALRRQQVRQNVQAYRQRNRERKLSESGTNPPNFPSNYRFSRASSTGSESYWESLSLQTSSIQTDVTVRAVKNGTIFSLKLPFKLKLGYASLEVFVNNSSGEPPDNFLLSTLILDQGIDSTTPSFLESPVQLFQLEPGTSQTIKVEIRCGGLKTEVSFNSSGTSWMLEEALIALAFNMLSRERRDQKLIMKSIYIENHSLGLLNIGLKSFTEGICLQASNILISTAMTMAVSELLINDCEERSRIHLQGANTLVNHGRPKNNSARKFLQDYRELQLPINTIDKKANFLSEPIMGDWKESSAKNRL	319	#N/A	#N/A	#N/A	#N/A	#N/A	#N/A	#N/A	#N/A	hypothetical protein GcM1_221047 [Golovinomyces cichoracearum]
aug-contig_119-processed-gene-24.17	MPQVASYTPKWLSRPNPGHDIFNLGSPESQPRDISHQNRSRASNKRLEKPGPRRCIALRGSEVFVAVGKEIRWADLVNVKEVWDEHQFENCSSLREEKSETRSSIFGAQNSLYRIIKTPVADDIRQLLISPRGNHVAILTTHTIHIAILPEPPQLKCLDKSPVKLKCFTLGPTTHVTSQAGIITALWHPLGVNSNCVVTVTEDAVVRVWELSMGSHASFDQPTIGIDLKKLVDGTSADQDFRASNSGFSGKTFSPDSFEMQVASACFAGKGSGGWSPMTLWIAMRTGDVYALCPLLPEKWSPTPNLISSLSVSIVARVAAIEDDPTVSQVEKDLAQQQLVWMSEIDNQEPYIIEIPGEPSVEVFCRPLRPGKIPKLQGPLQIELGPEESDDELVDLLSD…	880	Nuclear pore complex protein An-Nup82	P:GO:0000055; P:GO:0000056; P:GO:0006406; P:GO:0006606; P:GO:0006913; F:GO:0005515; F:GO:0017056; C:GO:0005643	P:ribosomal large subunit export from nucleus; P:ribosomal small subunit export from nucleus; P:mRNA export from nucleus; P:protein import into nucleus; P:nucleocytoplasmic transport; F:protein binding; F:structural constituent of nuclear pore; C:nuclear pore	#N/A	#N/A	#N/A	IPR037700 (PANTHER); IPR036322 (SUPERFAMILY)	#N/A	hypothetical protein Golomagni_02007 [Golovinomyces magnicellulatus]
aug-contig_119-processed-gene-25.187	MDTWSYEQVETMKRIGNIASNSIYNPLNKKAPINLDADDTDSSMERYIRQKYQDKVIKASKESSAASPDSEDLPPPLPPKTGSRFGVRSSSSTFPFSVKHIKEVAQKSDKNFMPSLKRNKTSRVFSVSMEEANDYGSKNSKLHDTDFTEKRNLTVLKEMEGNLEKSIETLVCLGESDTRKTKQREMSNIPISDNANVSVCLSVDDSSHNSCKNSSNPFDLLSPGYMTVQPLSSQSTGRLQQGQINNNLGQQALGYNTTYLAPLQSSYSLDPVSQNMFINKSHSLFPNRTGPGFPGAQVTQPELIQQPTTPTPISPQKHDSPLISQYMSQLSLKNPNCNPFTQDSGQAQLAKNNDNNNYNSYNNRHLTSLNPQQYPVQQPAHSNNMPGKYPSEILSYSAQ…	574	Putative GTP-ase activating proteins for the small GTPase, ARF	F:GO:0005096	F:GTPase activator activity	K12486	map04144	ArfGap,UBA	IPR038508 (G3DSA:1.10.220.GENE3D); IPR001164 (PFAM); IPR037278 (SUPERFAMILY)	T	putative uba ts-n domain-containing protein [Golovinomyces cichoracearum]
aug-contig_119-processed-gene-26.26	MSTNLEAPTSSVSHDIHTQTISTFVQNIFQKYGLSEIAITDIDEKKFGSSVIDLENTTKGELASTIITYITYYVDQDLYDEELFWEFKQDFIGWKRHHFDTAGILKKDLKRILLERGIFVASKGYADSLALEMVINEKEIHVWTTEEIKTALKRNINYHPKIGILKNSQTPHISPKIEESNNQDQRQTPIRSNTKQPSEPPTNFPIKQRYSATPFQSIGPQLSEYDNQNIVVKSQLESFWTLPPVPVQTELTDPDIIVKFVKCFDNKKRYTGEPYDILEDKTRIFLALAENMNIRPGQLHAVFPQILTGRAEWYFINHMRPYDMFSTMYVQLKQHFDTEVNHEHYYTDWTTTSFDKLRQEFSSESLHQILQRLFDKLLLCQRALCPAYAGQQPLKTTLI…	1657	Encoded by	P:GO:0015074; F:GO:0003676	P:DNA integration; F:nucleic acid binding	#N/A	#N/A	RVT_2	IPR013103 (PFAM); IPR036397 (G3DSA:3.30.420.GENE3D); IPR001584 (PROSITE_PROFILES); IPR012337 (SUPERFAMILY)	L	RVT 2 domain containing protein [Pyrenophora teres f. teres]
aug-contig_119-processed-gene-27.0	MSASTQPSSSASTDPGDQMHPSLLGIAAAMEQYERQTKQRMSAAQSFLQNIDAWAKSQAGTEIAAIVAPLMEKVSHIVTEFAIGNDNTPTPIGKNPHPQMSQLTTSVPRVTKHIENPHHALPLKPQLSASPWVTVARKAAKLPDPPANLAKRRPDVQTKTAGNEPPKEDKRLFLRIGRDHPWRQLSPVTIKKMVTERAGVAPSAILAMTQVRSGLAMECASDALRETILRVSPSLQNVNVTIDAASDWTSVIVPHVPLYIRTMSGRIEVTSEMVKAECQAVCGVTPIQVRPNYVKIGQYSTSWIVHFKQVPANLKFRLFDESGPAMPFTRRRPIEQCQRCWGFHSTRNCVKGQRCEKCSGTHEKAACTNKLPKCANCAGPHEATNPDCMARPSRQHGQV…	485	EKA-like protein	#N/A	#N/A	#N/A	#N/A	#N/A	#N/A	#N/A	hypothetical protein K3495_g11956 [Podosphaera aphanis]
aug-contig_119-processed-gene-27.4	MYYSTHISAPQPQVSQSTSSALGQYTPHQHQTSLQSAPSHYSASPSTYSQYGNYSNGLTSPQSSLNHVSGAMCHQGNVLPHPANIAGIQNTISGSNFASQPGYDASGQVAPPGVKPKVTATLWEDEGSLCFQVEAKGVCVARREDNHMINGTKLLNVAGMTRGRRDGILKSEKLRHVVKIGPMHLKGVWIPFERALEFANKEKITELLYPLFVHNIGALLYHPTNSNRTNSVIAASERRKQEQNQMRNSSFAHGFPSFNQHHHSMGTTFNSNQMSNNQHQSVTPHPHWSRSNIDRVQSFPTPPTSASSLMGNMNNSEGNFQWGPPQSGIGNIQNSAPITIDASLNSSRSMPTTPASTPPGSSIQSIHYRQQQQQQQANQSYEISRQVFTTPSSQQNACS…	655	KilA-N	P:GO:0045944; F:GO:0003677; F:GO:0003700; F:GO:0043565; C:GO:0005634	P:positive regulation of transcription by RNA polymerase II; F:DNA binding; F:DNA-binding transcription factor activity; F:sequence-specific DNA binding; C:nucleus	K12763	map04113	KilA-N	G3DSA:3.10.260.10:FF:000003 (FUNFAM); IPR018004 (PFAM); IPR036887 (G3DSA:3.10.260.GENE3D); IPR029790 (PANTHER); IPR003163 (PROSITE_PROFILES); IPR036887 (SUPERFAMILY)	K	hypothetical protein Golomagni_02659 [Golovinomyces magnicellulatus]
aug-contig_119-processed-gene-28.171	MIDSSQVKTQISSEAATNFSHVKTTSISQNAIQDLENSSPMRHAKHLAQTSLDTDLTSSAKLQSNRQSPSSVNFELSRSPRKFSSPDRRFPVKPYSPQRHSSTIQSPSIEDVLRDNEGITKAIEILEGKGSDTEDEKCSDDTILIKAGSPGADNDHSNMDDTITSTFSSFSAIPDMTNFSELRQNTIRNIDASLTARSQITPATCRRSMALPFYDKHYDDGNTTNLLEFTADVDKYTNTPSPAKLARQSVLHNKRLLDMTLNSSPSVKRHTMTNLLDFDIPPAPTPRSLPTITPRELESLKSGFLSEISSLKASLSGKEAEVFSLKTAVADAEKRVGESLEQLREEQGQRQQLAADKDDWEKSWREMESMVRGLNEKILHGEQDREELEGRLAESDARR…	670	Central kinetochore-associated	#N/A	#N/A	#N/A	#N/A	Kinetocho_Slk19	IPR024312 (PFAM)	#N/A	hypothetical protein Golomagni_01985 [Golovinomyces magnicellulatus]
aug-contig_119-processed-gene-28.179	MTSNKQVVILHTKEEWDTWIELMKTTSLKYDVWKFVNPELEDSEREQLKEPKRPTTNDVRTPSTGSTSTKISELTIDEKDEYAFLKEEYVRDLKRYEKQKEALADLRIKVQESIHPTNITFTYDCDTVHQMLRNLAVQFAPTDEIRRQEIELEWQALQTNWTNNMEVNQWLHNWEVTYNKMARIKSSDIEGLKPVYKFLNSVNTLDPQFATSWILKLSMGDKITFPELLIIFRNYRRNISNLLKQQPQHGAFPTLQGLNEHGRSVAEDMKPSSNSSDQHKSKLKCQCGSKHKYNRTIKYCAYLIPEAAKYWKQVLDPERVTKVDKKLSTDTDFRKLVEKWRKEYKPPGGTSTVNTQNLYASDRPETPPTVAMASLGKLTAFNLANSTFQISSELKKPIY…	1537	Encoded by	P:GO:0015074; F:GO:0003676	P:DNA integration; F:nucleic acid binding	#N/A	#N/A	RVT_2,gag_pre-integrs,rve	IPR036397 (G3DSA:3.30.420.GENE3D); IPR054722 (PFAM); IPR013103 (PFAM); PTHR11439 (PANTHER); IPR001584 (PROSITE_PROFILES); cd09272 (CDD); IPR012337 (SUPERFAMILY); IPR043502 (SUPERFAMILY)	L	Retrovirus-related Pol polyprotein from transposon TNT 1-94 [Golovinomyces cichoracearum]
aug-contig_119-processed-gene-28.184	MPPSFCDPVSESNLVSSPLMSASRTLLLAPPSIAAHEERLREVLADFDRNTTDLQMMDRLSNGIATLPHSTYDLILVLTGVDGTRSESTRLLDRKSFQQVYLSLKAGGKFKAQNTILSQDRGSTEFREAILAGLVLEDEEIVKPHSLASETVPLRFSRRKDEESALSSDEPLKEHRITNYTEPHSRTSNVGNGSESRKDEAGSDESDDLVDEDTLLTEEEMHRPLNIPAECAPRAGKRRRACKDCTCGLAERLAAEENDKISKADAKLRTLKLDANDLSEVDFTVKGKIGSCGNCSLGDAFRCVGCPFIGMPAFKPGEEKDLYKLQNT	328	Component of the cytosolic iron-sulfur (Fe-S) protein assembly (CIA) machinery. Required for the maturation of extramitochondrial Fe-S proteins. Part of an electron transfer chain functioning in an early step of cytosolic Fe-S biogenesis. Electrons are transferred to the Fe-S cluster from NADPH via the FAD- and FMN-containing protein TAH18. Has anti-apoptotic effects in the cell. Involved in nega…	P:GO:0016226; F:GO:0051536; C:GO:0005737	P:iron-sulfur cluster assembly; F:iron-sulfur cluster binding; C:cytoplasm	#N/A	#N/A	CIAPIN1,DRE2_N	G3DSA:3.40.50.11000 (GENE3D); IPR046408 (PFAM); IPR031838 (PFAM); IPR007785 (PANTHER); IPR007785 (HAMAP)	#N/A	hypothetical protein Golomagni_00874 [Golovinomyces magnicellulatus]
aug-contig_119-processed-gene-29.15	MLNGHESYQSLEFQELCKEYKIYTLCMPPHSSHLLQPLDVGWFSPLKRAYSREVESLMRNHINHITKFEFLPAFKAVFDRSFTPVNICSASWGAGLVPYQPETILSKLGVQLRTPTPPAAHTEALWEARTPSNARELEAQSTVICERVGQNKSSSPASIIEKIDQLKKRDEMMILSAELMKERIASLERANEAASKRRERKKKRIQKRGVLTKGTGEDILAQREADQQLAREKCQGGERSGLSRQALARCKTCGETGHNSRTCKKKESVASAYILC	276	Transposase	F:GO:0003676; F:GO:0008270	F:nucleic acid binding; F:zinc ion binding	#N/A	#N/A	DDE_1,HTH_Tnp_Tc5,HTH_psq	IPR004875 (PFAM); IPR001878 (PROSITE_PROFILES)	#N/A	hypothetical protein OPT61_g5076 [Boeremia exigua]
aug-contig_119-processed-gene-29.16	MGATEIDGSWVMRLDEFVAWKPVQRSELGSWVKGVERWRQRERAKVRLRLRPDMVDYMAWPSLFLARPNKAQQEYTHQKRFLQPQKRSGINSWPIEAAVTGAPGILSESKRNNGGKLATQAVSSDFINSSYQNTSNSKVTVTTITTRSHSPAPSMILDIYSDSNDSASFFVSLNTVGRATNSATELSISEPTLSVISQGQETVSLPPLYLASTSHPSHSLNFSSTSATTDSNSISNHRYSSFTVNSTPPRLSFVSLIITASSSPTDNIASESKATSLSSLPLESIVPAQITSTPTTPTEDVGNGEIGEPISQTPTSTERSHYSSHHSSDTPLVIGGVMGSIAGTAIVIFLIITFIRWHKNNKWMVPLDNDDTQGIAEISPGASSALPSSDMVQQRLHPF…	546	#N/A	#N/A	#N/A	#N/A	#N/A	#N/A	#N/A	#N/A	hypothetical protein Golomagni_00788 [Golovinomyces magnicellulatus]
aug-contig_119-processed-gene-29.18	MPATIETTIKWCEDSAIKYKNSRLQDEELWEIAYDDLNEAIATGVVDIESLKPTSDYKTALMDLRGVLRRNGVYICRKAGKKVTECFSEFLRTSANGTVPVWPLASLQSLINSEVTSITDISLGLQYLCRQNSIIKSESGNNAFTTKMENQIDNNNLENPTPIITPSSINQPISSSSTNDLPRILGNILRMYQVDDKKYGGWDDSLDYKMEMYKDICDINQCPANHRIDGLMLALKEPALSEFRSHRHDAGMTFEGMIKHLRECYEGTDFKRSELQAYHAISYKLIRERNPNKLPSECVVILVDTLNEKRRGLDPSQRSEDAMHTRLTNACWGIPEFQSALSAPSPHLSTFINQLKMAVSNYHAIMKEPISTYIAESYLEDNTREEVNDRHIVSARIL	398	Reverse transcriptase (RNA-dependent DNA polymerase)	#N/A	#N/A	#N/A	#N/A	#N/A	#N/A	#N/A	hypothetical protein EV44_g1317 [Erysiphe necator]
aug-contig_119-processed-gene-30.21	MSAKIQKIVVRLQQTIKDGQPYEAQQQTRVAASRHVKSKNWDSAIEILFNVAESLLKAGQGGSGGDLSLMLVNVYNKAELKPDPNNKGKLLTLLRLSRELTLHSWSAKYGQYPAGEPDLHHVTGSIYAEEREIYEAERHLTLGTKDSPEILANLEYEWYNLDDSHTAPIYAARVVFPYLLAGNVRDANKSLQIFLDKLIITNNTILVQNVSFRMTNVRIFPSLPLLNFLSLLLVAVQKDNPNAFKQLTSRYSTHIKEISVWDDALALVGEIYFGIPRPRQGNPLFDIMGSIFSGTSPAKPKTKRIGTVELEKHLEEPIADVLD	323	Protein of unknown function (DUF410)	P:GO:0045048; F:GO:0005515; C:GO:0005829; C:GO:0072380	P:protein insertion into ER membrane; F:protein binding; C:cytosol; C:TRC complex	#N/A	#N/A	DUF410	IPR007317 (PFAM); IPR011990 (G3DSA:1.25.40.GENE3D); IPR007317 (PANTHER)	#N/A	Golgi to ER traffic protein 4 [Golovinomyces cichoracearum]
aug-contig_119-processed-gene-30.23	MIEHLDQLQYCLSDEYQGDKAMLNKLIEAARREPAYRLACFRPSSSLQGLINDLYSSVTTFEDTENPQKSNEVLFVDRQYHFSDPKSANRKFKSRPIQISQSEESGQRNVTNNRRCYFCGAKGYQQHFLCNSNDWEHEMETLVLETSSDIVEEIQDLRYDQFITSSGAVSPELALDLIADLQDKLFTHTITKCPNSEEKDSFIYLSEDRYSISEFHGIMIDVDVSQVSTGGYGQCLALNKISKTEINFSTAGTVNVQFGIGSTPSIGSVDTNTPVGTLTFHIVKANTPFILCLKDMDSLDVYFNNMQDMLIQRQSHFPIIRKFGHAFLLPTRFKIPATFLTEIELRQLHRRFGHPSVNRLIRILERSSHEKNDSSHRNALEKIGKPCHYCQKHGKSPGR…	1078	Encoded by	P:GO:0015074; F:GO:0003676	P:DNA integration; F:nucleic acid binding	#N/A	#N/A	RVT_2,rve	IPR036397 (G3DSA:3.30.420.GENE3D); IPR013103 (PFAM); IPR050951 (PANTHER); IPR001584 (PROSITE_PROFILES); IPR012337 (SUPERFAMILY)	L	hypothetical protein K3495_g11818, partial [Podosphaera aphanis]
aug-contig_119-processed-gene-30.30	MRSLNTSLPGTTPIKQPDPPEQLLAAFKAAALSVTNLYKSAASNQGEARLEGYQNAIDELLNFLDKENIGLNDGEGWRIRRWATERLDGRDMTSHNTESDDEGDKTDRGSSPVCQRTNNSTRISPLTSNNRRILSPIRRDPTPPSIVSANDENITTLPTPLTAFTFQASYPYPQDADIVLADLESEGSRTSNTDPSILPHASLQASGITLPRLPRARSNHSNRHGSKAAGSLGKGAGQKRKINYGDFFDIGNGGYGRDNLGGGGKRGRFA	270	#N/A	#N/A	#N/A	#N/A	#N/A	DUF4588	PTHR38645 (PANTHER)	#N/A	hypothetical protein Golomagni_02812 [Golovinomyces magnicellulatus]
aug-contig_119-processed-gene-30.32	MEESLLLDFPNGECAPLPDSTIFSSEAEAFGWAQRQASTGGYAFSNLYKNKSKVTGDIILSCYNCDKGPKTYQNKPTTTSKSKQRDGTGSKKCGCQYKITIKPNESKKWVIIPKKSHNHGRNSSSIAHPAHRIAALQNTLRAEILNAANSGSSISQIMSAFREREGFNLIGKDISNIIQKERQKQLGGMTPLQWLLKELQDNGYNTRFETKDGNILSKLMYLHPQAIQLWKDHPDVLLMDCTYKTNRFNMPILNICGVTGGNKVIQLGLVFLSSEKENDYSWVLQQLKQIMTLEAIRAPLSIVTDRELALMKSLEAHFSDTPHLLCRWHVNMNVLAKSKKYFPKPTKKGNSYVRSPIFVEFLKQWNAVLAATSEETYKQEVAKLEAMAPKDAYIYVERT…	753	#N/A	#N/A	#N/A	#N/A	#N/A	#N/A	IPR018289 (PFAM); IPR052579 (PANTHER); cd07177 (CDD)	#N/A	hypothetical protein K3495_g3010 [Podosphaera aphanis]
aug-contig_119-processed-gene-4.104	MEESLLLDFPNGECAPLPDSTIFSSEAEAFGWAQRQASTGGYAFSNLYKNKSKVTGDIILSCYNCDKGPKTYQNKPTTTSKSKQRDGTGSKKCGCQYKITIKPNESKKWVIIPKKSHNHGRNSSSIAHPAHRIAALQNTLRAEILNAANSGSSISQIMSAFREREGFNLIGKDISNIIQKERQKQLGGMTPLQWLLKELQDNGYNTRFETKDGNILSKLMYLHPQAIQLWKDHPDVLLMDCTYKTNRFNMPILNICGVTGGNKVIQLGLVFLSSEKENDYSWVLQQLKQIMTLEAIRAPLSIVTDRELALMKSLEAHFSDTPHLLCRWHVNMNVLAKSKKYFPKPTKKGNSYVRSPIFVEFLKQWNAVLAATSEETYKQEVAKLEAMAPKDAYIYVERT…	753	#N/A	#N/A	#N/A	#N/A	#N/A	#N/A	IPR018289 (PFAM); IPR052579 (PANTHER); cd07177 (CDD)	#N/A	hypothetical protein K3495_g3010 [Podosphaera aphanis]
aug-contig_119-processed-gene-4.115	MVYSAGKLASQLKEFIFSNHVYADELSDEVIQKICEEADKEREEPVPSGITKRKGKARRSLAPRYPSEWANSKQQFLKAVRKFETPEHHDGQNQSARVQASYNLETPPSKQTRSYDMKQSSIDQSQTAQNTQILTTPSLSMIPREIISLFSGFGKLNEDNWDTWKGHMQDNLEIYNLWDTVTGNEMRPTDSYPDLLDSWTAREKIARVAIKNSLGSKDYKQVRHANTAACTWKTLTSLNQATGAQGKMDLIWKFWSMRCEEETSVQEHIGEIRAVHSELSDLGIFIENYLLALLISKSLPSSYENCVSTIFAGIKDLEEADPEFVSNKIIEEEMRRQNCYAKGGGKEGQGPRQIARRKKAEAEQKKGQEKKDVELANEEAFYTNSGASVHIANHREMFI…	2737	Encoded by	P:GO:0015074; F:GO:0003676	P:DNA integration; F:nucleic acid binding	#N/A	#N/A	#N/A	IPR025724 (PFAM); PF14223 (PFAM); IPR054722 (PFAM); IPR036397 (G3DSA:3.30.420.GENE3D); IPR013103 (PFAM); IPR039537 (PANTHER); IPR001584 (PROSITE_PROFILES); IPR001584 (PROSITE_PROFILES); cd09272 (CDD); cd09272 (CDD); IPR043502 (SUPERFAMILY); IPR012337 (SUPERFAMILY); IPR012337 (SUPERFAMILY)	#N/A	hypothetical protein K3495_g12742 [Podosphaera aphanis]
aug-contig_119-processed-gene-5.154	MTIHQPSLQYSRRRPNGEPEELYLQSPVSQQSQRQRQRKQSSGSQEWILFEPSSEDTAESFRNTSSVRTLTVGFSQISDFESLETGAWSFNDDEEFDENNGEDEELDSLDSHLPEFRNEPGAHSNLGPGPSGTILPTHDGLGSFRLDHKVNDNEAQQHLYSFERFNPHKVEMGKESTKLDLLGLDAGQVQEAELLRRIELWRLEQSNLLHEIHRESLQHGSEVQNNEQKRKIEGLVQETVASLSNSGTETSQDESESLFIRITRKLIQDLIGIDDNLLSILFGESLACDIEPSRTSDLQSTPDKKYGNISWELKILERIACELGTLASKISAHPTRFNNCSNSSSISLPLPDTAMAPGTEKYQTAIPNNARYESSVTSRLLNFKFKPTIRKQSQPIPDS…	592	#N/A	#N/A	#N/A	#N/A	#N/A	#N/A	#N/A	#N/A	hypothetical protein Golomagni_04839 [Golovinomyces magnicellulatus]
aug-contig_119-processed-gene-5.155	MVEGVVVDLEQNEVQHAPVVNAKSYGRETLELKGTALKIIEKFLKRVDSDLKKDGFRPSISFMNEVNEALDAVSTLRSLEDEPANWNKFLEDRMLALENAVNKSLESKSQKPVNTISASTDSKASYASALSQGLSKTAVRIRISGAEKMLPAELLSKAKEHIKGAYAVRQMRSHDTEVFVQSAHQRDTALNMPHPETFKILRQDYPVEVSGVPLSTKIAGGKNADNNGIIKNIIEGSTIRIPGLQINRIRWLHDGKEVLNSQKNGHTRGSIVYWTLCSSPPNYGLQKDMSNSASTVTSGGTLRHHVQRQLDVLKEITFRIVNVYSPITSRQDLIGWDSISKALTDDGSECIVTGDFNCHHPLWGGLLARRDIRAQNLLHLTENQGLKLVTPCGIPTFRR…	1339	reverse transcriptase	F:GO:0003824	F:catalytic activity	#N/A	#N/A	Exo_endo_phos_2,RNase_H,RVT_1	IPR005135 (PFAM); IPR000477 (PFAM); IPR036691 (G3DSA:3.60.10.GENE3D); PTHR33481 (PANTHER); IPR000477 (PROSITE_PROFILES); cd01650 (CDD); IPR036691 (SUPERFAMILY); IPR043502 (SUPERFAMILY)	#N/A	hypothetical protein Golomagni_04582 [Golovinomyces magnicellulatus]
aug-contig_119-processed-gene-6.116	MQEITSLSEFEELKSSSLLIIDFYATWCGPCKFISPTFEKIAAEHASSTSIIFAKCDVDNASDVAQACHISAMPTFKFFRNGVNVDEVRGANLHKLNQKLDQFIADVAKEQEVKNNKSNLTSASASTPKPESLRDLIDANSSKLLGTSNLSSVQNIISPPPAGYAIASVAGSSQLLIHIVFSALVNLDSLLISMMKDSALSAPSRIEVGSNISVKIHTVNDEERNDLGMEMLKKAENLQSFSLFNDDYIDSTAVLKLKPSKFSKIKSLTIRFDSNFSGDSSVETKIGKIDILGVKI	296	PITH domain	#N/A	#N/A	K03671	map04621,map05418	PITH,Thioredoxin	PR00421 (PRINTS); G3DSA:3.40.30.10 (GENE3D); IPR013766 (PFAM); IPR010400 (PFAM); IPR037047 (G3DSA:2.60.120.GENE3D); PIRSR000077-4 (PIRSR); PIRSR037293-1 (PIRSR); PTHR46115 (PANTHER); IPR013766 (PROSITE_PROFILES); IPR010400 (PROSITE_PROFILES); cd02947 (CDD); IPR036249 (SUPERFAMILY); IPR008979 (SUPERFAMILY)	O	hypothetical protein EPUL_002275 [Erysiphe pulchra]
aug-contig_119-processed-gene-8.22	MVETIPPFVSFLLPATLRLSHNRQSSSSISNTKKVSRRSISLDSPTKTDVKPSPTNLKFLSSSCNEISSDKEQNNSSKRTSRNYLNSQYPSTLRCLKCSTDLAYTSQILSKSFIGRLGRAYLVAPPPPPPFVPSFPPKPRPKADLINTRSERPMSRELMTGRHVVTDISCIVCGTILGWKYLDAREESQRYKVGKVILERERICVWGSWEDETGDDLNTGILDEWADRVSDTSVQFDSDDEEEREKLFSGIWNRDVVARRRKSKKPASREIDTISFNIDETSN	283	Yippee zinc-binding/DNA-binding /Mis18, centromere assembly	#N/A	#N/A	#N/A	#N/A	Yippee-Mis18	IPR004910 (PFAM); IPR039058 (PANTHER); IPR034751 (PROSITE_PROFILES)	#N/A	hypothetical protein Golomagni_04733 [Golovinomyces magnicellulatus]
aug-contig_119-processed-gene-9.17	MASEHDRLSQKISEVFDVKISRRLGELKRVTDALREWEAHQESLSELKSLLSDPSTDDELRKLASEDLADTNSRVETISRNLAAALTPVHPFEKFPCLIELRPGAGGSEAAIFAADLLRMYTAYCARVGLHTSLLKYETIDGTDSPLAEAIIEVSNAGAYGRLRTEAGVHRVQRVPATESKGRVHTSAVGVLVLPSLPTSPGENQLLSEADLDDPSSDYYVNPTDVRTDVMRARGAGGQHVNTTDSAVRLTHIPTNTVVAIQDSRSQHANRAKAWQLLRSRLAQAKREAREEEVMKLRRGVIGVSKMGRGDKVRTYNWGQQRVSDHRSGIHCYNLDDVMSGGTELDKIIESVKTWQLECEMEAILMDEKTSTDISK	376	PCRF	P:GO:0006415; F:GO:0003747	P:translational termination; F:translation release factor activity	#N/A	#N/A	PCRF,RF-1	G3DSA:3.30.160.20:FF:000070 (FUNFAM); G3DSA:3.30.160.20 (GENE3D); G3DSA:6.10.140.1950 (GENE3D); IPR005139 (PFAM); IPR000352 (PFAM); G3DSA:3.30.70.1660 (GENE3D); IPR050057 (PANTHER); IPR045853 (SUPERFAMILY)	J	Peptide chain release factor 1 [Golovinomyces cichoracearum]
aug-contig_11-processed-gene-1.0	MTNNKHSLGEGRATRLQKAAFSNLLGTVYGQGNLLFNPDGTCLYSPVGNRVSVFDLVNNKSYTFPFAHRKNISRLDLTPGGKLLLSVDEDGRAILTNVPRRIALHRLTFKGSVTALAFSPSGRHFAVGIGRLIEVWLTPSSPDQNEDGKIDFSPFVRHHVHAGHYDTVESIQWSGDSCFFLSAAKDLTARIWSLDAEEGFTPTTLAGHREGVVSAYFSLDQKIIYTISRDGAVFQWTYLPAPLSDSNEDEEHGGTRNEISRWRISQRHYFMENGTKVRSTAYHPESNILVVGFSNGVFGLYEMPEFNKIHSLSVSQNKIDALTINKSGEWLAFGSSKLGQLLVWEWQSESYILKQQGHFDSINALVYTPDSRRIITTADDGKVKIWDVKTGFCIVTFTE…	907	Dip2/Utp12 Family	P:GO:0000028; P:GO:0000462; F:GO:0005515; C:GO:0032040; C:GO:0034388	P:ribosomal small subunit assembly; P:maturation of SSU-rRNA from tricistronic rRNA transcript (SSU-rRNA, 5.8S rRNA, LSU-rRNA); F:protein binding; C:small-subunit processome; C:Pwp2p-containing subcomplex of 90S preribosome	K14558	map03008	Utp12,WD40	IPR020472 (PRINTS); G3DSA:2.130.10.10:FF:000219 (FUNFAM); G3DSA:2.130.10.10:FF:000470 (FUNFAM); IPR007148 (PFAM); IPR015943 (G3DSA:2.130.10.GENE3D); IPR001680 (PFAM); IPR015943 (G3DSA:2.130.10.GENE3D); IPR015943 (G3DSA:2.130.10.GENE3D); IPR027145 (PANTHER); PS50294 (PROSITE_PROFILES); PS50294 (PROSITE_PROFILES); IPR001680 (PROSITE_PROFILES); IPR001680 (PROSITE_PROFILES); IPR001680 (PROSITE_PROFIL…	A	hypothetical protein Golomagni_05323 [Golovinomyces magnicellulatus]
aug-contig_11-processed-gene-10.13	MEKFLRDWRQDALNKHQYDSAVFIGDKLLALTQNDKDAFWLAQVHFSTGNYTRAQSFLSRQDLIARNPSCQYLAAHCLIKQGKFDEALVILGDKNPVHLISSDSNIRRKFQHTNGNSKTGSKADGRSDRDKRDEASTDDAGNIRFEAAMCFLRGLCHAKQNAFDRAKECYKDAVRIDVQCFEAFEQLMKNCLMSPDEEWEFLASLDFDSIIVSKDASSSQEAAEFTKTLYTTRLSKYKNPAAFKAATETLSTHYNLSKNPDLLLSQADLLFTQCRFKEALIITNYILQDDKYNFSIYPLHLACLYELLMKNELFLIAHDLADNHPDEPCSWLAVGVYYLATNKVAEARRYFSKASMMDPHFGPAWIGFAHTFAQEGEHDQAISAYSTAARLFMGTHLPQ…	619	Anaphase-promoting complex, cyclosome, subunit 3	P:GO:0016567; P:GO:0031145; P:GO:0045842; P:GO:0051301; F:GO:0005515; C:GO:0005680; C:GO:0005737	P:protein ubiquitination; P:anaphase-promoting complex-dependent catabolic process; P:positive regulation of mitotic metaphase/anaphase transition; P:cell division; F:protein binding; C:anaphase-promoting complex; C:cytoplasm	K03353	map04110,map04111,map04113,map04114,map04120,map04914,map05166	ANAPC3,TPR_1,TPR_10,TPR_12,TPR_16,TPR_2,TPR_8	IPR011990 (G3DSA:1.25.40.GENE3D); PF12895 (PFAM); IPR019734 (PFAM); PF13424 (PFAM); PTHR12558 (PANTHER); IPR019734 (PROSITE_PROFILES); IPR019734 (PROSITE_PROFILES); IPR011990 (SUPERFAMILY); IPR011990 (SUPERFAMILY)	DO	hypothetical protein Golomagni_04033 [Golovinomyces magnicellulatus]
aug-contig_11-processed-gene-10.8	MYSNLALALLGLSTLGSSHMIMKSPVPFAATKLASDNGPLKDDGSDFPCKFGYDAEGANNVMPLGSRQELAFIGGATHGGGSCQVSITYDSAPTANSVFKVIHSIEGGCPARNVAGNIGSSSATEDPDRYGFSVPENLPPGNAVLAWTWFNKVGNREMYMNCAPVTLTGPSAKQAISKNETQVEKRDMDAYNALPNMFVANIGNGCKTKDNTDLKFDNPGQSVEVLSSNSLAGPLGNCAATAKTTASSTDSSDDPSPAAGAFFTASPVPKPAAAPDAESEPKVEPVPASDPAPEPKVAPEPESQSPAAASSIPEDDYTPTESTIKQPSYESSNTDTNLTSPSNSSPSTGVKGSIKAGDSCSSEGAWNCVEGNSYQRCASGTWSVLMPLAEGTSCDAGNG…	433	#N/A	#N/A	#N/A	#N/A	#N/A	#N/A	G3DSA:2.70.50.70 (GENE3D); PTHR36182 (PANTHER)	#N/A	hypothetical protein GcM1_242084 [Golovinomyces cichoracearum]
aug-contig_11-processed-gene-11.16	MEESLLLDFPNGECAPLPDSTIFSSEAEAFGWAQRQASTGGYAFSNLYKNKSKVTGDIILSCYNCDKGPKTYQNKPTTTSKSKQRDGTGSKKCGCQYKITIKPNESKKWVIIPKKSHNHGRNSSSIAHPAHRIAALQNTLRAEILNAANSGSSISQIMSAFREREGFNLIGKDISNIIQKERQKQLGGMTPLQWLLKELQDNGYNTRFETKDGNILSKLMYLHPQAIQLWKDHPDVLLMDCTYKTNRFNMPILNICGVTGGNKVIQLGLVFLSSEKENDYSWVLQQLKQIMTLEAIRAPLSIVTDRELALMKSLEAHFSDTPHLLCRWHVNMNVLAKSKKYFPKPTKKGNSYVRSPIFVEFLKQWNAVLAATSEETYKQEVAKLEAMAPKDAYIYVERT…	753	#N/A	#N/A	#N/A	#N/A	#N/A	#N/A	IPR018289 (PFAM); IPR052579 (PANTHER); cd07177 (CDD)	#N/A	hypothetical protein K3495_g3010 [Podosphaera aphanis]
aug-contig_11-processed-gene-11.21	MSADEQTHFEISDLDKATDTDLNRFAKSELEYWKENGFKNRNLWDEYVLGFEGWTSEHFAKVDRHTRSKLRDHLIVNGVYMTPIGKLNKRLIAEQLMEPLQAKTYHVFTQDDEREWSDKRDLSISESSFGQKVPQYSSTNPTSLTIKRERLTPLDDHPPMNLPIRDFYGKNKQNTENSFEKQPQKWEDRPQPKCKQLEILAKLYKDQDKYTDDNDSFDYKLLIFYDLCRQACVQHEYYAEALTHMLNGKAKDIYLDSVLGKPQMTFEERCTKIKSYFETPAWKNDRQTAFNTLMFDIVLKNHPEKSMMENFNDMETELRRVQRGMDPPYSGDLALRNRIVNACFRVRELRNVLFRPADTAEAVCSDIRAALAQCAFDDPKTSTHYMTERRYQTVNKKPS…	1675	Reverse transcriptase (RNA-dependent DNA polymerase)	P:GO:0015074; F:GO:0003676	P:DNA integration; F:nucleic acid binding	#N/A	#N/A	RVT_2,rve	IPR013103 (PFAM); IPR036397 (G3DSA:3.30.420.GENE3D); IPR036397 (G3DSA:3.30.420.GENE3D); IPR050951 (PANTHER); IPR001584 (PROSITE_PROFILES); cd09272 (CDD); IPR012337 (SUPERFAMILY)	L	hypothetical protein K3495_g12084, partial [Podosphaera aphanis]
aug-contig_11-processed-gene-11.22	MASESSKNSVTNNGLEELYEKFLKIGIHKKSYSLIDTNCIHVNILPSDTSKITEKMRNTYVTSMMLGYNLSNSVDMALLTNFEEDFEGWKVEDFAALDRDIRKAFRELLAYRGIYLGKPTSKINNLLANLTKAEDLPEWDDDVLIKSKVHKDTYAYSRKQILLSGKIITKVPASTPEPIRSIKDSGNEEKLLQTQKVQNQTIPFAQPIQADIPIIPNQSIERQLIAPSETSYPPDSQQSKQSQQKVNRSDPAYYTIPPISTPNSDIDDYTWNQFNKKWDKSQNYTGKAYDILDDKMRYFLNICLVAHIILSQFHAVFPTILTGKAKSFFLYEVSQNINISFATMYKKIKKHFDTEINHRVYYQDWTTITFNSVKQTQVNDGQKDDDLSILDILLDKLQL…	1719	Encoded by	P:GO:0015074; F:GO:0003676	P:DNA integration; F:nucleic acid binding	#N/A	#N/A	RVT_2	IPR013103 (PFAM); IPR036397 (G3DSA:3.30.420.GENE3D); IPR050951 (PANTHER); IPR001584 (PROSITE_PROFILES); IPR012337 (SUPERFAMILY)	L	hypothetical protein HIM_12545 [Hirsutella minnesotensis 3608]
aug-contig_11-processed-gene-11.28	MGWFWGSSNDDKGADNDPLRNLEPGLREFLKKESPVKYKSSPPQPSPPQLSSSHSISSTTSSKEPSNSSSSQQIYSEKKTLPLVFKDGRYRHLWESYQSPEVVDSYMKSDQEKIDEILEGFKIRRAEIGKAALENCALEQEALSDCWTNGSAKSRLMLCREESKAFNRCHTMQSKLLKALGYLSSFDRPVEVDEEIQMRADKLYHIMLDKEKNIEAARAEGKPTSKFSPLLSKEISSSPLKPETEAAQRDVDQASRLPSDLKESVRKQLKERLEKLTPLEKEIEEQAIKAEIRAGESLGGNLTDVYEKQELDRKVRREQGKETIGDKVISAFGFGLNKK	339	#N/A	#N/A	#N/A	#N/A	#N/A	#N/A	#N/A	#N/A	putative autophagy protein [Golovinomyces cichoracearum]
aug-contig_11-processed-gene-12.14	MADKMAKYRTEIQQMMYVSGETSEASAETTGMIEEIVRQQVIEMASRRGSRSISTDDLIFLIRHDQAKVSRLRTFLSWKDVRKNVKDSDDKGVDADLGTGDEPVTAVAGGPVVDTAKKNKKAKVGLPWEVPSFYNQEVPEREDEEDEDEEEMNYATLQRLKKADERTKLMTKEEYVTWSEYRQASFTFRKSKRFKEWAGFGVVTDSKPNDDIVDILGFLTFEIVQTLTEEALKIKEQEDLFKEKTGGEQSGKKRKIQGLFDPPSEGHTTVEPRHIQEAFRRLQHRSTIQRAMCNFTRGLNRTSLKLF	307	Transcription initiation factor IID, 18kD subunit	P:GO:0006366; F:GO:0003712; F:GO:0046982; C:GO:0000124	P:transcription by RNA polymerase II; F:transcription coregulator activity; F:protein heterodimerization activity; C:SAGA complex	K11313,K19476	map04144,map05202	TFIID-18kDa	G3DSA:1.10.20.10:FF:000023 (FUNFAM); IPR009072 (G3DSA:1.10.20.GENE3D); IPR003195 (PFAM); IPR003195 (PANTHER); cd22926 (CDD); IPR009072 (SUPERFAMILY); IPR009072 (SUPERFAMILY)	K	SAGA complex subunit spt3 [Golovinomyces cichoracearum]
aug-contig_11-processed-gene-13.101	MSFPSKPQIQLLGSNGPIHAITYSSSPSTYILTGSSDRTIRLYNPSRVDETSALSNARIDEKSRYKSAQLIQSYSAHGYEVLSISIAPDNNTFASAGGDRTLFLWDVATATTTRRFSGNHGHSARINTVAFAGEAASLLVSGSFDATVRIWDLKSRNVKPVMVLNEATDSVSCVIASDGDIWTSSVDGKVRRYDIRMGRMIVDLIGIPVTCLRATKDQRGLLLSGLDSQIRLMDIETGSLLRSYRADGWKNEEFRMWSCFGGRERWILSGNEEVEGSDGEIVVWDTLSGNLVERVKVEGSKVEGRKKIGRDGKDKERRNVISCIVWKEDGNADQWCCGGTDGIVTVFGS	349	WD domain, G-beta repeat	P:GO:0000398; F:GO:0005515; C:GO:0071013	P:mRNA splicing, via spliceosome; F:protein binding; C:catalytic step 2 spliceosome	#N/A	#N/A	WD40	IPR020472 (PRINTS); IPR015943 (G3DSA:2.130.10.GENE3D); IPR001680 (PFAM); IPR051980 (PANTHER); PS50294 (PROSITE_PROFILES); IPR001680 (PROSITE_PROFILES); IPR001680 (PROSITE_PROFILES); IPR001680 (PROSITE_PROFILES); PS50294 (PROSITE_PROFILES); IPR036322 (SUPERFAMILY)	#N/A	hypothetical protein Golomagni_00636 [Golovinomyces magnicellulatus]
aug-contig_11-processed-gene-13.102	MAPLSRGIKSEHSLSPKNKPKLEKLKVVEYQNFSPPANSSEPCAAENLAVEDDGLGPRIWTGNRFLPRFSHEQFIPGEGKCYFYDDGSYCKAVIDGEVVNAHWGVTKTGKPRKRLAIACMTCREKKIKCDPNYPRCVQCEKFGRTCKFKNAPRGSQSLPGTPFADITELPIQQSSIKDEGITGVKRESFQSVSPRQTLVRHEILDNEIHHQKRQKNGYCEFTPKISIISPRYSVKNLSLPSTPFFEKNKCTFFDSTVSSQLQTNPYILWPEFVTDLLNIFFKHIPETISGIFAEVSFKNWALTPISKTLDDNTTLYAILCLASVFSPNPEVRAKGGLYAQSCRLGCEDRPFSLQLVHSRLLLALYYFTSNESDLAWDICGSAMRAASKLKLNLELEKSD…	740	Fungal specific transcription factor domain	P:GO:0006351; P:GO:0006355; F:GO:0000981; F:GO:0003677; F:GO:0008270; C:GO:0005634	P:DNA-templated transcription; P:regulation of DNA-templated transcription; F:DNA-binding transcription factor activity, RNA polymerase II-specific; F:DNA binding; F:zinc ion binding; C:nucleus	#N/A	#N/A	Fungal_trans,Zn_clus	IPR001138 (PFAM); IPR036864 (G3DSA:4.10.240.GENE3D); IPR007219 (PFAM); IPR050815 (PANTHER); IPR001138 (PROSITE_PROFILES); cd12148 (CDD); IPR001138 (CDD); IPR036864 (SUPERFAMILY)	B	hypothetical protein Golomagni_00637 [Golovinomyces magnicellulatus]
aug-contig_11-processed-gene-13.103	MAGENVGVAEKGQNNKTRQNTTTEHNASKETVANLPMDKNMEIIRNLLKKLRKVYTGEGTEKDLPSENDVAEAVKAFNAHKREWDQTRANTTPIEERMSALEEVVRKSLVDSAQKANSTAVSGPPAPKTYASVVAPPMSKTAVRIRVEGAKDLQPTELLQMAKEHIPGAYAVRQMRSNDTEVFVQSASQRDAALNMTQPTDFKILRHVFPVEVCGVPLRTKIEGGKNANNNRLIMEIVNATMVRIPDLKINRIRWLHDGKEVERAKKNGHTRGSVILSLPSETLQEQVVRNGIVIDAMLYTAQVWSPRAQPKQCYNSSQWGHTQASCGKKAQCGECAGAHQTRDCPRKRVSCCNCGKEHRSWQRGACRTYQVYKGSVQKARLELLERTAEIRKEKVPTM…	473	Encoded by	#N/A	#N/A	#N/A	#N/A	#N/A	#N/A	#N/A	AIR1 domain-containing protein [Blumeria hordei DH14]
aug-contig_11-processed-gene-14.23	MAGENVGVAEKGQNNKTRQTTTTEHNASKETVANLPMDKNMEIIRNLLKKLRKVYTGEGTEKDLPSENDVAEAVKAFNAHKREWDQTRANTTPIEERMSALEEVVRKSLADSAQKANSTAVSGPPAPKTYASVVAPPMSKTAVRIRVEGAKDLQPIELLQMAKEHIPGAYAVRQMRSNDTEVFVQSASQRDAALNMTQPTDFKILRHDFPVEVCGVPLRTKIEGGKNANNNRLIMEIVNATMVRIPNLKINRIRWLHDGKEVERAKKNGHTRGSVILSLPSETLQEQVVRNGIVIDAMLYTAQVWSPRAQPKQCYNCSQWGHTQASCGKKAQCGECAGAHQTRDCPRKRVSCCNCGKEHRSWQRGACRTYQVYKGSVQKARLELLERTAEIRKEKVPTM…	473	Encoded by	F:GO:0003676; F:GO:0008270	F:nucleic acid binding; F:zinc ion binding	#N/A	#N/A	#N/A	IPR001878 (PROSITE_PROFILES)	#N/A	AIR1 domain-containing protein [Blumeria hordei DH14]
aug-contig_11-processed-gene-17.132	MAQLRSPAILESSREPHSVSLKVLRLSRPSLSIQQPLPASSDQILSSASYAYPIPNTFNNGYILSPLLTLPPAFGYAYVGETFSCTLCANNEILPGSTTEKSITAVRIEAEMKTPSSSVPTKLDINSAESFSPDLGKRDNNEESVGTPLAIGESLQKIIHFELKEEGSHVLSVSVTYSELSATNGRVRTFRKLYQFACKNCLVIRSKTSILPSNLQSRWALESQIENCGEETITLENIYLNEHTGFKCTSLNWDIVPAGSVKENPKLMPGDVYQVCFFLEEEDEKRELAGKNQILVNMSLCWRGAMGNKGFLSINPLGTK	320	Protein of unknown function (DUF974)	C:GO:1990072	C:TRAPPIII protein complex	#N/A	#N/A	DUF974	IPR055429 (PFAM); IPR055427 (PFAM); IPR010378 (PANTHER)	#N/A	putative trafficking protein particle complex subunit 13-like protein [Golovinomyces cichoracearum]
aug-contig_11-processed-gene-17.135	MDNLWTRRSNNSKLSVPTASSNSNTTSTQDHPSRGHSYGRRHGENSTHGNKSPFNIVSPSTVALPSPSSGASSSFGLGTGAFASFGTSKSSKTSSSSLDLGNVGPVKTQNTETGDTTAKRPKASLSDQNNSGNSSPSPTHILRHNWVVWFRPPTVKSNGYVQYEKTLHPVAGFGNVEDFLAVYRHLKRPSTLPPVSDYHLFKKGIRPVWEDDENRKGGKWIVRLKKGLADRFWEDLVFAIVGDQFADASEEVCGAVLSVRNGEDILSIWARNDGGRVLKIRETMKRILGFPPDTRVEWKSHDSSILQRTAIDEHRKEKFNHQNLNTGRNGNRAVESLASPLPEKK	345	Eukaryotic initiation factor 4E	P:GO:0006413; F:GO:0000340; F:GO:0003723; F:GO:0003743; C:GO:0016281	P:translational initiation; F:RNA 7-methylguanosine cap binding; F:RNA binding; F:translation initiation factor activity; C:eukaryotic translation initiation factor 4F complex	K03259	map01521,map03013,map04066,map04150,map04151,map04211,map04910	IF4E	G3DSA:3.30.760.10:FF:000015 (FUNFAM); IPR001040 (PFAM); IPR023398 (G3DSA:3.30.760.GENE3D); IPR001040 (PANTHER); IPR023398 (SUPERFAMILY)	J	Eukaryotic translation initiation factor 4E type 2 [Golovinomyces cichoracearum]
aug-contig_11-processed-gene-18.114	MDSLKSDPDFLHRLASELPKDIRLRLYYLSTPQTPSPSLYLEVHGKKPDQTLCSKHFLVVAINQSSNEDCQERREILAYAVEVLIYFTAHNTTFFISKADSTGYLDKLKLAKHVPSPIQTITTTFLQFLIDSHKKAHVKNTISLFARAQDQYLFPGSVENPGKHVLNDRGLIRWWCRILNPILESSQDELNSFWDSVRGYIIIPGLDIRETLSYTPPRTKNLWSVGHPLLEISGIKGIVSPRNLIPRFPDDPKARFLDELDEEIVKSGNSNGHWKNVKTLDHFWEMMAFRQECSAGRLVGFIWIVLSPNQEPTQIESSYTNSKVVTSVDNSKIVSRSENQSKLLDYHTLLDVSQSRSTTCDEQVDTRSLSMKMNYETNSVTSSKPLKRPFSNKNRILAG…	526	Histone acetylation protein	P:GO:0006325; P:GO:0006355; P:GO:0006974; F:GO:0004402; F:GO:0010484; F:GO:0032931; C:GO:0005634	P:chromatin organization; P:regulation of DNA-templated transcription; P:DNA damage response; F:histone acetyltransferase activity; F:histone H3 acetyltransferase activity; F:histone H3K56 acetyltransferase activity; C:nucleus	#N/A	#N/A	HAT_KAT11	IPR013178 (PFAM); IPR051236 (PANTHER); IPR016849 (PROSITE_PROFILES)	#N/A	putative h3 k56 histone acetylation protein kat11 [Golovinomyces cichoracearum]
aug-contig_11-processed-gene-18.124	MSKFSLSSSIRGGSEDDSEDNLPSPEELLRSDFLSSDFDASNYLSSLCDRHQSLEDLQSDLRERSQFLSQELIDLVNANYERFLSLGSDLNGGEEQVEDVRVGLLGFNSGVLDVRGKVKTKKDELERLLIEKIKIRRKISLGRKLLEVDIRLEELEGNLMITSSAQNLNESVEKGNGCQFHDKHTEDETTKNHDIPDNDLENLTCFATDYRSLESLMADIGVDHPYIKAQQTRMIRSRNMILTNLSEEIHQIKVSKDKSRLIELLGIYRKLDAAGEVIGILQEFNLRG	288	COG (conserved oligomeric Golgi) complex component, COG2	P:GO:0006891; P:GO:0007030; P:GO:0015031; C:GO:0016020; C:GO:0017119	P:intra-Golgi vesicle-mediated transport; P:Golgi organization; P:protein transport; C:membrane; C:Golgi transport complex	#N/A	#N/A	COG2	IPR024602 (PFAM); IPR009316 (PANTHER)	#N/A	hypothetical protein Golomagni_00135 [Golovinomyces magnicellulatus]
aug-contig_11-processed-gene-18.132	MPITITVVGSLNTDLVTVTSRIPSGGETLTANSFFTGLGGKGANQAVACARLSRPNPSAKIPVNIIPDVTIKMIGAVGADDFGSHIINSMASVNIDTSGVKVKEGQTTGVAIILVEESSGENRILLNPGANSTVKAKDFEQPSALGNPLPDLVILQLEIPLPTVLQILKTSRKAGLDVLLNTAPAVKLPDEAYQGLAHLILNETEAMILTGRSLLDVNQPDFDWTNVTNEFIIKGVRNVIVTLGAKGALFASCENGQNTVEHIPATQVEKVVDTTAAGDTFVGAYALGVVRGNEKIDILKNACLAAARTIEKKGAQDSIPWSDEVGCK	328	Catalyzes the phosphorylation of ribose at O-5 in a reaction requiring ATP and magnesium. The resulting D-ribose-5- phosphate can then be used either for sythesis of nucleotides, histidine, and tryptophan, or as a component of the pentose phosphate pathway	P:GO:0006014; F:GO:0004747; F:GO:0016301	P:D-ribose metabolic process; F:ribokinase activity; F:kinase activity	K00852	map00030	PfkB	IPR002139 (PRINTS); IPR029056 (G3DSA:3.40.1190.GENE3D); IPR011611 (PFAM); PTHR10584 (PANTHER); IPR011877 (HAMAP); IPR011877 (CDD); IPR029056 (SUPERFAMILY)	G	Ribokinase [Golovinomyces cichoracearum]
aug-contig_11-processed-gene-18.133	MHLNELSAVPKALQSSDFKLIEPQLARLDKHLILRTYVEGYSLSDIDSKIWVSLRSNKAAVSYLKRNLLVNLCRWYKFVESTHPEIQEEIKAQVEKERAKRVAASKAGGSYAMALQDTDKGVVTRFPPEPSGYLHIGHLKAAMLNDYFAHELYQGTLLLRFDDTNPSKEKQEYQDSIVEDLKLAGIKPDKTSFTSDYLGNLYEYCIRLIKEGHAYTDDTDQETMRDQRMKGIASKNRNNSVETNLALFQEMKVASEIGLRNCVRAKMSVDNPNKAMRDPVIYRCNLLPHHRTGETWKIYPTYDFACPIVDSMEGVTHALRTTEYTDRNPQYQWFLDTLKLRQVHVWDFARMNFIRTVLSKRKLTKLVDSGVVWGWDDPRMPTIRGVRRHGMTISALRDF…	623	Belongs to the class-I aminoacyl-tRNA synthetase family	P:GO:0006412; P:GO:0006418; P:GO:0006424; P:GO:0043039; F:GO:0000166; F:GO:0004812; F:GO:0004818; F:GO:0005524; C:GO:0005737; C:GO:0005829; C:GO:0017102	P:translation; P:tRNA aminoacylation for protein translation; P:glutamyl-tRNA aminoacylation; P:tRNA aminoacylation; F:nucleotide binding; F:aminoacyl-tRNA ligase activity; F:glutamate-tRNA ligase activity; F:ATP binding; C:cytoplasm; C:cytosol; C:methionyl glutamyl tRNA synthetase complex	K01885	map00860,map00970,map01100,map01110,map01120	tRNA-synt_1c,tRNA-synt_1c_C	IPR000924 (PRINTS); G3DSA:3.40.50.620:FF:000037 (FUNFAM); G3DSA:2.40.240.10:FF:000004 (FUNFAM); G3DSA:1.10.1160.10:FF:000001 (FUNFAM); G3DSA:3.90.800.10:FF:000001 (FUNFAM); IPR004526 (NCBIFAM); IPR014729 (G3DSA:3.40.50.GENE3D); G3DSA:1.20.1050.10 (GENE3D); IPR020058 (PFAM); IPR020056 (G3DSA:2.40.240.GENE3D); G3DSA:3.90.800.10 (GENE3D); IPR020061 (G3DSA:1.10.1160.GENE3D); IPR049437 (PFAM); IPR0200…	J	putative glutamate--tRNA ligase, cytoplasmic [Golovinomyces cichoracearum]
aug-contig_11-processed-gene-18.134	MTSFGLMTRKEWVVPPRPKPGRKPATDTPPTKRKAQNRAAQRAFRERRAARVGELEGQLEEAREEQQNLEAELRSQIKQLEAEVERFKIEIDSWKSRCSILDSIVVYEKRAKEAALAELTFLREGAQATGTDSVPLPFRIVHSATNRQDFNIPNSTLSDNGPGTTTCGVQTTKGEDAHIDEAPESTELQCGNCTLDSSCACLEEALKDSLTMCSTSEYKRSHSPPANNLPDKRSRPSESCSPLEIDFTTQFASKGVMKMPELIEKIPPIESCGFCDDGTYCLCAEAIATSNEQHVSFINDISSSTLASVSDSKQPFHQKILPQQEISKENGPGTCQQCKADPRSGKFCRSLSALRESDSSKLPEGCCKKMGSVCCMSTNKSPMEPPRLSCADAYKTLSS…	462	Minimal binding motif of Hap4 for binding to Hap2/3/5	P:GO:0006355; F:GO:0000976; F:GO:0001228; F:GO:0003700; C:GO:0005634; C:GO:0090575	P:regulation of DNA-templated transcription; F:transcription cis-regulatory region binding; F:DNA-binding transcription activator activity, RNA polymerase II-specific; F:DNA-binding transcription factor activity; C:nucleus; C:RNA polymerase II transcription regulator complex	#N/A	#N/A	Hap4_Hap_bind,bZIP_1	IPR018287 (PFAM); G3DSA:1.20.5.170 (GENE3D); IPR050936 (PANTHER); IPR004827 (PROSITE_PROFILES); IPR046347 (SUPERFAMILY)	K	hypothetical protein Golomagni_00136 [Golovinomyces magnicellulatus]
aug-contig_11-processed-gene-19.113	MLEPTKLPSRFPCWVRAKFSYGGESKHDLGFMEGDLIECLNAGDGSWWMGRLWRDKRVKGLFPSNFVEVLDANFRPAVRSTSPMPNRSPSTSPFNPQPPRNTKSKLFRKPYQSYSAPAPPIKKPIDSPKQICTPPRAQSPAPLLRNTQPRVQSQVRRFESNIKPQSSPLHYDYRYDGIHSPSRVQNNHNPGLQIPGDFPPEPSIHSNYNSRVPSPLPIHNEISTHVVSPQEDVNCNYYYRTPSPHPPFQYEYDDRHQTILMDPQLNSTSSSPPPVPPPHRIIYTPNVIENVTTPRENYEDKPRAPTPTPPSSRGTGLTPSPLRSAMDDVMSSLADMGIPHDEPSSEAPLNPWSPEAFDQTYSRAWRNNESRLRNSNRYEVNENLYREEKGQPFEEKNQP…	1225	Transglutaminase-like superfamily	P:GO:0140278; F:GO:0005515; C:GO:0005737; C:GO:0110085	P:mitotic division septum assembly; F:protein binding; C:cytoplasm; C:mitotic actomyosin contractile ring	#N/A	#N/A	SH3_1,SH3_2,Transglut_core	G3DSA:3.10.620.30:FF:000005 (FUNFAM); G3DSA:2.30.30.40:FF:000168 (FUNFAM); G3DSA:3.10.620.30 (GENE3D); IPR001452 (PFAM); IPR056409 (PFAM); G3DSA:2.30.30.40 (GENE3D); IPR002931 (PFAM); IPR052557 (PANTHER); IPR001452 (PROSITE_PROFILES); IPR036028 (SUPERFAMILY); IPR038765 (SUPERFAMILY)	D	putative variant sh3 domain-containing protein [Golovinomyces cichoracearum]
aug-contig_11-processed-gene-19.114	MSTEEEAALASHYSVLHELGSGSFGTVYKAIEKKTGEVVAIKHIDLESSEDDIAEIQQEISVLRTCASPYVTQYKTSFLRGHKLWIIMEYLGGGSCLDLLKPGPFNEGHIAIICRELLLGLEYLHQEGKIHRDIKAANVLLSTTGKVKLADFGVAAQLTNIKSQRNTFVGTPFWMAPEVIQQAGYDFRADIWSLGITAIELIHGEPPNASIHPMKVLFLIPKAPAPRLEGPKYSKEFKDFVAQCLVKESDKRPSAKELLRHKFIRSAGKVEALQELIERRQEWDGGRNRPSHPKFYEETLNTINPKNCSDEWLFDTVKAPTIPQICNNTKRRRKLSVIKTNDQNLYFESEEAMKKLDLKDSPLEYSSPTQNIVTKSTMRKQTSVVRQRTPIREQRLSCC…	616	Serine/Threonine protein kinases, catalytic domain	P:GO:0006468; F:GO:0004672; F:GO:0004674; F:GO:0005524; C:GO:0005737	P:protein phosphorylation; F:protein kinase activity; F:protein serine/threonine kinase activity; F:ATP binding; C:cytoplasm	K08286,K08838,K21618	map00620	Pkinase	G3DSA:1.10.510.10:FF:000411 (FUNFAM); G3DSA:1.10.510.10 (GENE3D); IPR000719 (PFAM); PIRSR000661-50 (PIRSR); PIRSR500947-50 (PIRSR); PIRSR637770-2 (PIRSR); PIRSR600239-51 (PIRSR); PIRSR038189-2 (PIRSR); PIRSR000559-2 (PIRSR); PIRSR000632-1 (PIRSR); PIRSR000550-3 (PIRSR); PIRSR000620-1 (PIRSR); PIRSR037568-1 (PIRSR); PIRSR000604-1 (PIRSR); PIRSR630220-1 (PIRSR); PIRSR000554-1 (PIRSR); PIRSR000619-2…	T	Germinal center kinase 1 [Golovinomyces cichoracearum]
aug-contig_11-processed-gene-19.122	MQTADKSLLWNNGSNFNPRASISDNFSTFLSTINQSDILVYSDGSKLTHGNTGWGYVIFQVGRRVCSGSGPLGNTIEVQDAEVHATLHGIRATLSLPSARFTNNLWLFLDNKEVTKILLKSSPVRSSQNLYTEFWELEKKWGSRNRLPHTQEGQVNIYWVPSHSRIIGNEIADLEAKKAAAISISEPQLDRSFASLEKWHQARVISDRESWWNKQAPKSYTRLEIRSAPLLPKELLLSRKQLGRLIAARTGHGDFAAYHTRFKHTEAKVQCRCGSLKTPFHFFFCRILRRRGYRPEGNIHVLVPRLLGTAEGAVILTKWLSTKFFEEICP	330	Encoded by	F:GO:0003676; F:GO:0004523	F:nucleic acid binding; F:RNA-DNA hybrid ribonuclease activity	#N/A	#N/A	RNase_H,RVT_1	IPR002156 (PFAM); IPR036397 (G3DSA:3.30.420.GENE3D); IPR002156 (PROSITE_PROFILES); cd09276 (CDD); IPR012337 (SUPERFAMILY)	#N/A	hypothetical protein K3495_g7148 [Podosphaera aphanis]
aug-contig_11-processed-gene-2.169	MSSLDISKHLQVPTLERPFGIELWPIFDRIFYSVKGYHADEFEFNPAGTPMASAKSTFTAIVTYYVVILGGRELMRSRPAYKLNTIFKLHNFFLSTLSGALLLMFLEQIVPTIYRHGLFFSICDPQGGWTPQLVILYYLNYLTKYFELLDTVFLVLKKKPLTFLHCYHHGATALLCFSQLLGVTTVSWVPISLNLTVHVIMYWYYYQSARGIRIWWKEWITRLQIMQFVIDLGFIYFAAYNFFISAHLPSVPHYGRCAGEDVAALSGIAILTSYLVLFISFYIVTYSKTSGKRASGRKAAKSLKDAEIPDVQAILHGNSSKSSTGSNNSTRANRSRKA	338	Very-long-chain 3-oxoacyl-CoA synthase	P:GO:0019367; P:GO:0030148; P:GO:0034625; P:GO:0034626; P:GO:0042761; F:GO:0009922; C:GO:0005789; C:GO:0016020	P:fatty acid elongation, saturated fatty acid; P:sphingolipid biosynthetic process; P:fatty acid elongation, monounsaturated fatty acid; P:fatty acid elongation, polyunsaturated fatty acid; P:very long-chain fatty acid biosynthetic process; F:fatty acid elongase activity; C:endoplasmic reticulum membrane; C:membrane	K10245,K10246	map00062,map01040,map01110,map01212	ELO	IPR002076 (PFAM); IPR002076 (PANTHER)	I	Elongation of fatty acids protein 2 [Golovinomyces cichoracearum]
aug-contig_11-processed-gene-2.175	MSNKGLSKADREIASQGFHEDEETRNARKLFGVTSQNLSSVSNTLPESSDKDVRQRHQRGRSAGSRPPKVENKEGETNFNINEDDEDEEEEYDYDDMAPGANWDRNLPSEAVSNKTALRWSGFDWKPHKSMFLRGPGNWISYKEDILIQLRAIGYRPRINLTPLDETKFAGIVQATTTPEARALIRGLTKGSQMMRVFESSYQQVGAAQQESAYEELSKLRYKGGCPLKYVTDFKCCVSNLSAVGGKISKFHVKATFKSSVKEKARLWHSTMIAMPIYQNLTIDQLYENFLAFLNNRIQREEVITKEVVRNRVKSIQSTQSSEVVDTKQKADHEDKKKSRLKKNMAFDTGADIDATNDQKNFTPGTIVELSSKQFSIQTGNGIIFGSCMGEVLLPLKGP…	1486	Reverse transcriptase (RNA-dependent DNA polymerase)	P:GO:0015074; F:GO:0003676	P:DNA integration; F:nucleic acid binding	#N/A	#N/A	#N/A	IPR013103 (PFAM); IPR025724 (PFAM); IPR036397 (G3DSA:3.30.420.GENE3D); IPR039537 (PANTHER); IPR001584 (PROSITE_PROFILES); cd09272 (CDD); IPR043502 (SUPERFAMILY); IPR012337 (SUPERFAMILY)	#N/A	hypothetical protein K3495_g13133, partial [Podosphaera aphanis]
aug-contig_11-processed-gene-20.6	MSLDKVKHIILVLSGKGGVGKSSITAQLALCLSLEGKSVGILDIDLTGPSIPRLFGIESAKVTQAPGGWLPVSIHPANPAAGIGKLSCMSLGFLLRDRGDAVVWRGPKKTAMVRQFLSDVLWSDIDYLLIDTPPGTSDEHISLAETLLTAVTPDQIAGAVVVTTPQAVATADVKKELNFCIKTGINVIGIVENMSGFVCPQCSECTKIFGSGGGEKMAEEFNFKFLASVPVDPQLVILFETGKIPVYPQGTDLGSHVFGDDTNKMTTSNFMSGEILVEKYRFCSLFPIFKSITKDIVTTIECTNKISDLS	310	Component of the cytosolic iron-sulfur (Fe S) protein assembly (CIA) machinery. Required for maturation of extramitochondrial Fe-S proteins. The NBP35-CFD1 heterotetramer forms a Fe-S scaffold complex, mediating the de novo assembly of an Fe-S cluster and its transfer to target apoproteins	P:GO:0016226; F:GO:0005524; F:GO:0051536; F:GO:0051539; F:GO:0140663; C:GO:0005829	P:iron-sulfur cluster assembly; F:ATP binding; F:iron-sulfur cluster binding; F:4 iron, 4 sulfur cluster binding; F:ATP-dependent FeS chaperone activity; C:cytosol	#N/A	#N/A	ParA	G3DSA:3.40.50.300:FF:001300 (FUNFAM); IPR027417 (G3DSA:3.40.50.GENE3D); IPR033756 (PFAM); PIRSR038134-1 (PIRSR); PIRSR038134-2 (PIRSR); IPR019591 (PANTHER); IPR028600 (HAMAP); IPR019591 (HAMAP); IPR019591 (CDD); IPR027417 (SUPERFAMILY)	D	hypothetical protein Golomagni_04522 [Golovinomyces magnicellulatus]
aug-contig_11-processed-gene-21.10	MEESLLLDFPNGECAPLPDSTIFSSEAEAFGWAQRQASTGGYAFSNLYKNKSKVTGDIILSCYNCDKGPKTYQNKPTTTSKSKQRDGTGSKKCGCQYKITIKPKESKKWVIIPKKSHNHGRNSSSIAHPAHRIAALQNTLRAEILNAANSGSSISQIMSAFREREGFNLIGKDISNIIQKERQKQLGGMTPLQWLLKELQDNGYNTRFETKDGNILSKLMYLHPQAIQLWKDHPDVLLMDCTYKTNRFNMPILNICGVTGGNKVIQLGLVFLSSEKENDYSWVLQQLKQIMTLEAIRAPLSIVTDRELALMKSLEAHFSDTPHLLCRWHVNMNVLAKSKKYFPKPTKKGNSYVRSPIFVEFLKQWNAVLAATSEETYKQEVAKLEAMAPKDAYIYVERT…	753	#N/A	#N/A	#N/A	#N/A	#N/A	#N/A	IPR018289 (PFAM); IPR052579 (PANTHER); cd07177 (CDD)	#N/A	hypothetical protein K3495_g3010 [Podosphaera aphanis]
aug-contig_11-processed-gene-21.9	MSSSSVKDVAVSSGQEDKQKSVNNYIKEKIKEFSEFNFKDDNLWEAFKDDFSSFTEADFKAASLSAQRGLRLYLRSNGVWVEWDSKRKTTIAKSLYNTLTEKVPTEWTQDEVSNSNETFNSVKILHLIKSVSNKQSTSSLKERETSTTLTSNNQPANNPHFKPYQPPTDYARELTNLSKMYEPELKYHGDDDCFDFKLNIFIELCEKSGVPEALYGKAYSTMLCGPALTHYYSITLNGHRKSFDRLSSATREHFEGPEIKQNRSARWEALSLSRIIMENEGKGKYTLDCLMPLIKELRFLQLSLDPEYRTDKHLHLKLLNSCRSMQACQLACFKPSETLSGLINDLQASISTSEEANESSTTQLFTDRRFHKSRNYNPKTSSQKLPLNHHTSRNPPGVK…	1584	Encoded by	P:GO:0015074; F:GO:0003676	P:DNA integration; F:nucleic acid binding	#N/A	#N/A	RVT_2,rve	IPR036397 (G3DSA:3.30.420.GENE3D); IPR036397 (G3DSA:3.30.420.GENE3D); IPR013103 (PFAM); IPR050951 (PANTHER); IPR001584 (PROSITE_PROFILES); IPR012337 (SUPERFAMILY)	L	hypothetical protein K3495_g12593, partial [Podosphaera aphanis]
aug-contig_11-processed-gene-22.19	MSPASKSKEAVSDPATNVPGSFSGREERHKAREEKSKEIEDPDAEWGHGINPENYSPVQLNQYALWRLSNYRSREHSFERKMHTEDLFNEFWEDFNTFELKHFNMLIRDVTRPLREYLRDHGVWVRNERTVPIALSLFNCTRSDNNLWLEKGYDAPKTSEKQELNTNPVQESEPRAVESSNSTYQHAFVPKCQDPVSSTDHPFVRDISNLAKSYTDELKYSGNSDDNFDDKYDIFMEMCNRFGIRTDGLKFAFPTMLKDIALSFYFNRCRGKSLSDLCQAMRENFEGPEYRRYNLQKWNAISFQNIIDENPSKSGMEQVTILINRLDKLQKSLSPEFRTDATLHDKIISACINIEACKMACYRPSPTVPGLIHDLKSGIEIFNKLLPSSSVLPAQSTSQ…	1430	Encoded by	P:GO:0015074; F:GO:0003676	P:DNA integration; F:nucleic acid binding	#N/A	#N/A	RVT_2,rve	IPR036397 (G3DSA:3.30.420.GENE3D); IPR013103 (PFAM); IPR050951 (PANTHER); IPR001584 (PROSITE_PROFILES); IPR012337 (SUPERFAMILY)	L	hypothetical protein K3495_g12054 [Podosphaera aphanis]
aug-contig_11-processed-gene-22.23	MGFRRYQSCGKYDGSETAGKWLRKLTFDLREAEVQETPEVFFESIDLNFVGEAADWVDSTPQYLIFTEQLEVPTKEDVEDFKIAFMSRFPSKNTNDRGEDSIQEDTGNFTQGPSETLSEYYGRAQHLLRRSHTRDTPSKDAITLSPSERILLKGIIKAFLRGLYEKNLKKTILTRPLPISLRDAFEQAQQVLAEKVKGSSSQPLEPQNFRPKSNGAQSERNPAGQGGHLSFGKPNPNSGYKDQFQQRDFTQPQGKGTYQKQGNRPNGSRNTPPRTLSRHPIVNGSKLYDRSMGNLCLSCGEIGHRKPECTSRPLEYWEQGYLKDMIYSNMNSNFAGFEDRGSLRYREIENSSWRNRNLEKAEGRQASQQAKKPSYERIIDNNDIPHLTCEEYDGISCNG…	1808	WGS project CABT00000000 data, contig	P:GO:0015074; F:GO:0003676; F:GO:0008270	P:DNA integration; F:nucleic acid binding; F:zinc ion binding	#N/A	#N/A	#N/A	IPR001584 (PFAM); IPR036397 (G3DSA:3.30.420.GENE3D); G3DSA:3.10.10.10 (GENE3D); IPR043128 (G3DSA:3.30.70.GENE3D); IPR043128 (G3DSA:3.30.70.GENE3D); IPR041588 (PFAM); G3DSA:1.10.340.70 (GENE3D); IPR050951 (PANTHER); IPR001584 (PROSITE_PROFILES); IPR001878 (PROSITE_PROFILES); IPR012337 (SUPERFAMILY); IPR043502 (SUPERFAMILY)	#N/A	hypothetical protein EPUL_006396, partial [Erysiphe pulchra]
aug-contig_11-processed-gene-23.95	MLRVTLAATAPLQSFLAAITGRKCLKWKQGLLQPLPIPDRYHSELSIDFMTDLPAKKEGNPKFMMVIVDRLAKTVTLEAMTSMTAEECAERFIQCHFRFHGFPSALTSDRGSNWTSRFWTQLCKMLKIEQRLSTSHHPQTDGATERMNREVLSYLRAYVTYAQFDWVKLLPGAILAINNRDTSLGVSPFFLTHGYHIDPVPTIDNRKSTKTPEGRAKDFINRLHEETEFAQAAMASTQKRMEEYANRSRRPAESFRTGDQVWLNLKNIETPQLSKKLSWMHGKYKVIGIPAANVVTLDVPTGIFPKFHVDLLKRAHDDPLPSQVRDDPQPPPLISADEDGDALWEVEKILRAEEHRRGRGFVRRVLVKWKGYQAPTWEPRNELQGKDALKEFIAKYGTR…	417	Integrase core domain	P:GO:0015074; F:GO:0003676	P:DNA integration; F:nucleic acid binding	#N/A	#N/A	Chromo,Glycoprotein_B,RVT_1,Retrotrans_gag,gag-asp_proteas,rve	G3DSA:2.40.50.40 (GENE3D); IPR023780 (PFAM); IPR001584 (PFAM); IPR036397 (G3DSA:3.30.420.GENE3D); IPR050951 (PANTHER); IPR000953 (PROSITE_PROFILES); IPR001584 (PROSITE_PROFILES); IPR016197 (SUPERFAMILY); IPR012337 (SUPERFAMILY)	L	hypothetical protein K3495_g1821 [Podosphaera aphanis]
aug-contig_11-processed-gene-24.11	MEQLKVHNSLKPGAPVPFLPKDEGKVSWIMRDYFELKVQFVMNITDVDDKIILKARRQKLLELEKLKSLTEPELITMAMAAFRFYVKMNLPSIIEVDTSEELTLENFVTRRDALYGRVLIGESLIEGVKPGDTETKIKMHLANLKSASEAIQKKRIFGGADEVLLPYLDSLYKGLVDGNDHKIFTDVTKYWEERFMEDMDSLNVLRPNVITRVTDYVPQIIKFVEKIISKGFAYETDGSVYFDINAFEKAGNKYARLRPESRNDRTLHEEGEGSLSKDLGGKRGAGDFALWKKSKIGEPFWPSPWGNGRPGWHIECSVMASDVLGSQMDIHSGGIDLTFPHHDNELAQSEAYFCTEGCKSYNWVNYFLHMGHLSIAGSKMSKSLKNFQTIRDALQTEYT…	771	tRNA synthetases class I (C) catalytic domain	P:GO:0006418; P:GO:0006423; F:GO:0000166; F:GO:0004812; F:GO:0004817; F:GO:0005524; C:GO:0005737	P:tRNA aminoacylation for protein translation; P:cysteinyl-tRNA aminoacylation; F:nucleotide binding; F:aminoacyl-tRNA ligase activity; F:cysteine-tRNA ligase activity; F:ATP binding; C:cytoplasm	K01883	map00970	DALR_2,tRNA-synt_1e	IPR024909 (PRINTS); G3DSA:3.40.50.620:FF:000186 (FUNFAM); IPR015803 (NCBIFAM); IPR014729 (G3DSA:3.40.50.GENE3D); G3DSA:1.20.120.1910 (GENE3D); IPR032678 (PFAM); IPR024909 (PANTHER); IPR009080 (SUPERFAMILY); SSF52374 (SUPERFAMILY)	J	hypothetical protein Golomagni_02207 [Golovinomyces magnicellulatus]
aug-contig_11-processed-gene-24.14	MSLQLDTVEEVTVYVQERLDLYKAKGIRDDPLWERWVEDFEGWDIKLFSKIESELRRDLRDYLISRGVYMEPNPKGKHIDQQLATEVKREEFHEWTPEQIAFYQKKNPLVRTLRAAAEYEKRREDVESLKCEKQADYKEETKFLSEINSDCEVSKQTNTENNDYPPHSILKNRPKQQKNYQMPWEERPLHKSKQLESLAKLYKDEDKYKDGTDSFDYKLKIFFNNCNNACVEKKYLKDAIGIMFTGGAREKYLDLTLHDNHLTFEDRCDLIKSHYETDHWINRRETVWNTINLIEEMRKCSDKLEVFNNLERELRRIQRGLQSHAGDAALRTRIINACSGVAELHFVLFSPAKIAEGVCSDIRARFMQLSLSNTSSSQYHQLEYPERGYDSTYLAEQER…	1618	Reverse transcriptase (RNA-dependent DNA polymerase)	P:GO:0015074; F:GO:0003676	P:DNA integration; F:nucleic acid binding	#N/A	#N/A	RVT_2,rve	IPR036397 (G3DSA:3.30.420.GENE3D); IPR036397 (G3DSA:3.30.420.GENE3D); IPR001584 (PROSITE_PROFILES); cd09272 (CDD)	L	hypothetical protein K3495_g12084, partial [Podosphaera aphanis]
aug-contig_11-processed-gene-24.8	MTHRISPFLFPGTEATSDKLSIIHLKRDHQIPVILREHDEDDEGYAEGKVVNTRFGNFPHRTLIGLPWGSQVRASKVDTGSRGRRVKADALKRKRESVGTTNHSSKNIKTENTQDEELENQKLPSVTREDTENQKSPSVTREEKEAEVASSGFIHLLPPTPENWTSSLPHRTQVVYTPDYSYILHRLRARPGTRLIEAGAGSGSFTHASARAVFNGYPGINNSSKNRSELGKVWSFEFHEQRYEKLQVEIQDHGLENIVQVLHRDVCTDGFLIHEQTQHSNVGPERKLDDTQSESMVSTTNCEKSQQTQKSPSASAVFLDLPAPWLALPHLTRSAPAQSTFNQMPFAPQPSLSSTVPFISALDPSAPVHICTFSPCIEQVQRTVSVMRRLGWVDINVTE…	602	tRNA methyltransferase complex GCD14 subunit	P:GO:0030488; F:GO:0160107; C:GO:0005634; C:GO:0031515	P:tRNA methylation; F:tRNA (adenine(58)-N1)-methyltransferase activity; C:nucleus; C:tRNA (m1A) methyltransferase complex	#N/A	#N/A	GCD14	G3DSA:3.10.330.20 (GENE3D); IPR029063 (G3DSA:3.40.50.GENE3D); IPR049470 (PFAM); PIRSR017269-1 (PIRSR); PIRSR018249-2 (PIRSR); IPR014816 (PANTHER); IPR014816 (PROSITE_PROFILES); IPR029063 (SUPERFAMILY)	J	tRNA -methyltransferase catalytic subunit trm61 [Golovinomyces cichoracearum]
aug-contig_11-processed-gene-25.182	MEESLLLDFPNGECAPLPDSTIFSSEAEAFGWAQRQASTGGYAFSNLYKNKSKVTGDIILSCYNCDKGPKTYQNKPTTTSKSKQRDGTGSKKCGCQYKITIKPNESKKWVIIPKKSHNHGRNSSSIAHPAHRIAALQNTLRAEILNAANSGSSISQIMSAFREREGFNLIGKDISNIIQKERQKQLGGMTPLQWLLKELQDNGYNTRFETKDGNILSKLMYLHPQAIQLWKDHPDVLLMDCTYKTNRFNMPILNICGVTGGNKVIQLGLVFLSSEKENDYSWVLQQLKQIMTLEAIRAPLSIVTDRELALMKSLEAHFSDTPHLLCRWHVNMNVLAKSKKYFPKPTMKETYKQEVAKLEAMAPKDAYIYVERTWLIWKEKIVRFWVDKQLHFGYTVTST…	727	MULE transposase domain	#N/A	#N/A	#N/A	#N/A	MULE	IPR018289 (PFAM); PTHR47718 (PANTHER); cd07177 (CDD)	#N/A	hypothetical protein K3495_g3010 [Podosphaera aphanis]
aug-contig_11-processed-gene-25.183	MAESKIDSKVNLKNVEESNSGMAIAGLLLPGSMKLRGPENYLQWKQVMIRNIIASGLLKYIQSSQNNPSIDISNWQSLKEEDLSGISEWVMGNTKAANAIMYNCSSTPQTIIANYHNAAEMWNALEQAYEGTGIVVQHQELIKFVTLKYEDFNDLSGFITAFKNTIQRLSQVMDNNETIPSYWPAMLFVHALQKKFPIWTDRQRNRQRDKDIHNRPSLEELISDIQDEARRTNLKDSKSDTTKALYSGGKGKDKSSSKFCKTCKSRYHVTSDCLHNNSVKRKAWEEKTGKKWLSKEEFERIKCTNSDSSDSQDTLNKKINLYSSSRNKGSFSYKSSRSQYIAMVNFLPKALTSKDPAIILKDRWLADSGADTMVTNQMSDFTDYQNNPIEIDGAGGTTS…	1492	Reverse transcriptase (RNA-dependent DNA polymerase)	P:GO:0006508; P:GO:0015074; F:GO:0003676; F:GO:0004190	P:proteolysis; P:DNA integration; F:nucleic acid binding; F:aspartic-type endopeptidase activity	#N/A	#N/A	RVT_2,gag_pre-integrs,rve	IPR036397 (G3DSA:3.30.420.GENE3D); PF14223 (PFAM); IPR013103 (PFAM); IPR054722 (PFAM); PTHR11439 (PANTHER); IPR001584 (PROSITE_PROFILES); IPR001995 (PROSITE_PROFILES); cd09272 (CDD); IPR012337 (SUPERFAMILY); IPR043502 (SUPERFAMILY)	L	hypothetical protein K3495_g13243, partial [Podosphaera aphanis]
aug-contig_11-processed-gene-25.188	MAATGNLRDVFMKDTSTLNITQYNVNRSKDRVQQHFLQLLDPLKHHIFALQEPWRNPTDNTTLKHPAYHLIFPDGDKSRTCIYVSKHLATNTWKKENVPEETNGDITSISLETDVGKVWVHNIYNPPPLSHSSRDMNTLNWIPQILEKEGHHVLVGDFNIHHASWGGQAVTVQHKIADSFNDIMKEQNMELILPKGTITWMSRGSQSTLDLVFVSKELEGSVLEYRPANELEASSDHVPICTKLNLKAVEEVKRQPRLQCKKADWENTNAILAGKLRELRFGQNQPSSQQTIDEQATAIIHAIQKTMEEIIPKCRPSPFAKPYWTKECSEAVKETQRERRQWTIYQTEESWIEYRKASNRKKNTIKKAKNIGWRAVFSEATSDPSKLWRLTKWAKKTPE…	1030	Reverse transcriptase (RNA-dependent DNA polymerase)	F:GO:0003824	F:catalytic activity	#N/A	#N/A	Exo_endo_phos_2,RNase_H,RVT_1	IPR005135 (PFAM); IPR036691 (G3DSA:3.60.10.GENE3D); IPR000477 (PFAM); PIRSR604808-3 (PIRSR); PIRSR604808-2 (PIRSR); PTHR33481 (PANTHER); IPR000477 (PROSITE_PROFILES); cd01650 (CDD); IPR043502 (SUPERFAMILY); IPR036691 (SUPERFAMILY)	#N/A	hypothetical protein K3495_g12004 [Podosphaera aphanis]
aug-contig_11-processed-gene-25.196	MAGESAGVAENSQNNTTRQPNTTEQIAATGTVASVPMNKNLEIIRRPLKKLRNVYTGEGTVKGLPKESDFAAAIKAFNIHKKEWDQCRTQTIPIEERMLALEEVVRKSLAEPAQKAGSSSVSGPPALKTYASVVAPPMIKTAVRIRFEGAKDSQPPELLQRAKEHITGAYAVRQMRSNATELCVQSASQIDTALNMAKPEGLKILRHDFPVEVCGVPLRTKIESRKNANNNELITEIVNATKARISEFKINRMRWLHDGKEVERSKKNGHTRESVVLSLPTETLQEQVVRHGVIINAMLYTAQVLSPRAQPKQCYNCSKWGHTQASCGKKAQCGEYAGAHQTRDCPRKRVSCCNCGKEHRSWQRGACRTYQVYKKSVQKPRLELLERTAEIRKEKLPTT…	443	Encoded by	F:GO:0003676; F:GO:0008270	F:nucleic acid binding; F:zinc ion binding	#N/A	#N/A	#N/A	IPR001878 (PROSITE_PROFILES)	#N/A	AIR1 domain-containing protein [Blumeria hordei DH14]
aug-contig_11-processed-gene-27.12	MSTSTSSTVSFVQLYKESSSLTMNLTNVTQLEGQATYNIWSSTMIAVFRSMKLVEVVVDGMKPASNTNEDEDERKAYETLNNSALGIFIQVASPEIHKCIIDMENPHTMWTYLKSEYHRDTPNALVYQLGSLCQMTWSYHQTRPMSESIQKYESEWFQLQRLARNSSDPYRKGFSLFLAEDKAKRDFLLGALSRHLKNVVDNLTTKDDLTFSDVKQRFLDLDHEINSAFLTREPVNRANPLKPKPNRVKKSLECSFCRKHHPGYSQGHLYTDCKRLKEFRKKSKKNDTPEETAHMTVQNTQVSSQNFYLDTCATSHMCPYLGRFKNLSLCTGIVKTSSGGGMAIKGKGTVTLNCRLTDGKINKYILENVLYIPELALPLFSWRVERNKGLTLHDDGTTV…	580	#N/A	#N/A	#N/A	#N/A	#N/A	#N/A	IPR054722 (PFAM)	#N/A	hypothetical protein K3495_g14149 [Podosphaera aphanis]
aug-contig_11-processed-gene-27.4	MANSELNSVTYESLPKLLEHDTKVKVAGVDADGMLRGKVMSKEKFLSIAKSGFGFCSGLFRWDMHDDLYPNDLIIKGKSTIDMPDMLAFPDLNTFRRIPWENDIPFFLVSFHDPLQKTPIAACPRGLLKSTMEKLKSHGLGAMAGVEYEFAQFRVPPADLSSPSSPHNRVSIAKYLESNTVSSLPPLTEGRFGYSITRSVQNSDYFYNIFDSCKKFNCGIEGWHSETGPGVYEAALSYDEVQQLADKASLFKHAVKSIAIQYGITPCFMAKPWQNLPGNSGHMHISLVDAEGKNIFAREQKDPAAPYEDVANLSDLGRHFLAGLLDGLPDIMPIFAPTINSYKRLDERFWAPVSVSWGLEHRASSIRIIAPPTSKPGGTRFEIRVPGADTNPYYVLATI…	491	glutamine synthetase	P:GO:0006542; F:GO:0003824; F:GO:0004356	P:glutamine biosynthetic process; F:catalytic activity; F:glutamine synthetase activity	K01915	map00220,map00250,map00630,map00910,map01100,map01120,map01230,map02020,map04217,map04724,map04727	Gln-synt_C	G3DSA:3.30.590.10:FF:000005 (FUNFAM); G3DSA:3.30.590.10 (GENE3D); IPR008146 (PFAM); IPR036651 (G3DSA:3.10.20.GENE3D); PIRSR604809-1 (PIRSR); PIRSR604809-2 (PIRSR); PTHR43785 (PANTHER); IPR008146 (PROSITE_PROFILES); IPR014746 (SUPERFAMILY); IPR036651 (SUPERFAMILY)	E	Type-1 glutamine synthetase 2 [Golovinomyces cichoracearum]
aug-contig_11-processed-gene-27.8	MEESLLLDFPNGECAPLPDSTIFSSEAEAFGWAQRQASTGGYAFSNLYKNKSKVTGDIILSCYNCDKGPKTYQNKPTTTSKSKQRDGTGSKKCGCQYKITIKPNESKKWVIIPKKSHNHGRNSSSIAHPAHRIAALQNTLRAEILNAANSGSSISQIMSAFREREGFNLIGKDISNIIQKERQKQLGGMTPLQWLLKELQDNGYNTRFETKDGNILSKLMYLHPQAIQLWKDHPDVLLMDCTYKTNRFNMPILNICGVTGGKKVIQLGLVFLSSEKENDYSWVLQQLKQIMTLEAIRAPLSIVTDRELALMKSLEAHFSDTPHLLCRWHVNMNVLAKSKKYFPKPTMKGNSYVRSPIFVEFLKQWNAVLAATSEETYKQEVAKLEAMAPKDAYIYVERT…	753	#N/A	#N/A	#N/A	#N/A	#N/A	#N/A	IPR018289 (PFAM); IPR052579 (PANTHER); cd07177 (CDD)	#N/A	hypothetical protein K3495_g3010 [Podosphaera aphanis]
aug-contig_11-processed-gene-27.9	MSAPDNKNTETPVERNIKLQNFIQEHINKYTHPELHDYDLWETFQEDFKDWRLEDFKVVQNQFIIALRNQLRCRGVLVQKGRGYPIAQRLYDTVHQKDPLIWTEEEIKEQLISDTTNFDSRYNPNRNNPNLSLIPEKTSENNDSLQTGQEFIKKDLDKSKEFRFSQSSPHLTSNIKKLADMTKFYTEEEKYSGSQDRFDFKLTIFKDICERVNLPEDKRIKGLPIMLKGDAKKFYYQSLFPHINNLTNFDAVVNKIKSNFEGAEYQRTILENWQDITLDSFTLKSPEKPLSENFEDLLAMLRNLQLGLAPRYRDEEFLYTKLLHACKKNQACELACFKPASTLEGLIIDLRASISLKNKSKDSQYVVTNSDSYYTDRRYKSRPVDSKNVTRQSQHTLLL…	1526	Encoded by	F:GO:0003676	F:nucleic acid binding	#N/A	#N/A	RVT_2,rve	IPR013103 (PFAM); IPR036397 (G3DSA:3.30.420.GENE3D); cd09272 (CDD); IPR012337 (SUPERFAMILY)	L	hypothetical protein EPUL_004867 [Erysiphe pulchra]
aug-contig_11-processed-gene-28.14	MAQSSGIITEKVFTTNHLGIGRLQGKNAIVTGAAGGIGLETCILFAREGANVLLADISAPALEKAYAKISQLVPSARKVETKLCDVSKEVDVKAIVDHVDSWGGVDIIFNNAGIMHADDADAIDTPEKIWDLTQAINVKGVWFGCKYAVISFRKHKKSKGCVINTASVVALVGSATPQLAYTASKGAVLALTRELAIVHAREGFRFNALCPAPLNTPLLQDWLGDDRPKRLRREIHFPCGRFGEAIEQARAVLFLASDDANFINGQEFVVDGGMTKAYVTPEGPPTEAPINNSLLSEPIDDFKITCTSDMRV	312	Enoyl-(Acyl carrier protein) reductase	#N/A	#N/A	#N/A	#N/A	adh_short_C2	IPR002347 (PRINTS); IPR002347 (PRINTS); G3DSA:3.40.50.720:FF:000084 (FUNFAM); IPR002347 (PFAM); G3DSA:3.40.50.720 (GENE3D); PIRSR614007-1 (PIRSR); PIRSR611284-1 (PIRSR); PIRSR611284-2 (PIRSR); PIRSR000095-1 (PIRSR); PIRSR617711-1 (PIRSR); PIRSR614058-1 (PIRSR); PIRSR000094-3 (PIRSR); PIRSR000102-3 (PIRSR); PIRSR614058-2 (PIRSR); PIRSR614007-2 (PIRSR); PIRSR617711-2 (PIRSR); PTHR43180 (PANTHER); c…	Q	putative oxidoreductase YxbG [Golovinomyces cichoracearum]
aug-contig_11-processed-gene-28.22	MTNRAGSIQGILKNSSARSAPPKTKLRKNSSAKVVLPSGPGNEEEKYGKDPTHRNTLQNSGRSRSQSSISRRVSNQNTARFNGEDINIRLKWDEANLYLTEQERSSTMKIDEPKTPYAKRYDPAEDEEEMQVLESKENHIFGTEEARSPDDTNIRTTKLNKTRESINFDFKIKTSEEEIPSFFLGEPKEAIPEKDVAEFTTKKEKAVHVTAEENVGWSKEEREKHRNFEEMRKRHYEMKNVVNLLGHPGNDDDDELDEGEDKMDDIQP	268	Protein phosphatase inhibitor 2 (IPP-2)	P:GO:0009966; P:GO:0043666; F:GO:0004864	P:regulation of signal transduction; P:obsolete regulation of phosphoprotein phosphatase activity; F:protein phosphatase inhibitor activity	#N/A	#N/A	IPP-2	IPR007062 (PFAM); IPR007062 (PANTHER)	#N/A	hypothetical protein Golomagni_01888 [Golovinomyces magnicellulatus]
aug-contig_11-processed-gene-28.25	MSHKLDMPVLKVDVATIHQVDPRNAGSLHSMWTVFSRCASALEEGKRLENLSWRVWNRETLCCGSVGQLAVSRTPSFHSLNSRPSDKKFEQQSDRNFLLRHTTSDDLEKMVTIITEKKKLQELPDLRLSHNKNVPRRETGSRPLVSPSSPAIPIKANATNAVQGVTPGSANYLQRFDQSVSSDLTGDIMSVVPFDDSQSKAKTIFALGGSSGDESCNHGGSTQNSSWARLSQVQQRKKNAMFSFGGSSNEEEAPLTQKVADVSKTGSVLDKVASWRQTTFQEEIARRTIREEVIVDDVFETDEEDEVDESAIEDEDDSSEWEDSVEGSGNVSVDEKNLFRRVDSRPNLTSRRSLITTMLHQHDRMEALVSAATNSKSTPEINSNNSSTSQEKSTSLAHD…	516	Protein of unknown function (DUF3295)	P:GO:0000122; P:GO:0006808; P:GO:0031930; C:GO:0005737	P:negative regulation of transcription by RNA polymerase II; P:regulation of nitrogen utilization; P:mitochondria-nucleus signaling pathway; C:cytoplasm	#N/A	#N/A	DUF1752,DUF3295	IPR013860 (PFAM); IPR021711 (PFAM); IPR053043 (PANTHER)	#N/A	hypothetical protein Golomagni_00390 [Golovinomyces magnicellulatus]
aug-contig_11-processed-gene-28.26	MRAKGIPRQITEFVKSFLTDRTTEIKLGNHTSEQIQINTEIPQGSPLSPILFLFFASTLLPLLCTPHSTSVGFVDDTNILTWSDSTEENCRTLENMHKICEDWAAKNGVKFAPEKYQLMHFSRTTKRHNLQASIQIQGHNTNPGTSIRILGLYLDPKLHWGAHIKKTEQRAETQIRSITSLTHSTWGATFHKARVLYSAIVRPSITYGSQIWAQDGQKGKIPERLVQPLRKIQNKCLRTITGAYKSTSQKALEHETAILPMEIYLKYRRVQHAGLSLNQPVRKTIEAACNKIGPKNHNYKDPLTLSDTKDSETWNRACKAEESKEGQKRALKVAAFQEWADSWPNQTRNTHNRHRIAADPEICKAANIFIERITKKKKLNFRHTPSELHRNLTRAQSSI…	517	Encoded by	#N/A	#N/A	#N/A	#N/A	Exo_endo_phos_2,RVT_1	IPR000477 (PFAM); PTHR33481 (PANTHER); IPR000477 (PROSITE_PROFILES)	K	hypothetical protein K3495_g12004 [Podosphaera aphanis]
aug-contig_11-processed-gene-28.27	MSADEQTHFEISDLDKATDTDLNRFAKSELEYWKENGFKNRNLWDEYVLGFEGWTSEHFAKVDRHTRSKLRDHLILNGVYMTSIGKLNKRLIAEQLMEPLQAKTYHVFTQDDEREWSDKRDLSISESSFGQKVPQYSSTNPTSLTIKRERLTPLDDHPPMNLPIRDFYGKNKQNTENSFEKQPQKWEDRPQPKCKQLEILAKLYKDQDKYTDDNDSFDYKLLIFYDLCRQACVQHEYYAEALTHMLNGKAKDIYLDSVLGKPQMTFEERCTKIKSYFETPAWKNDRQTAFNTLMFDIVLKNHPEKSMMENFNDMETELRRVQRGMDPPYSGDLALRNRIVNACFRVRELRNVLFRPADTAEAVCSDIRAALAQCAFDDPKTSTHYMTERRYHTVNKKPS…	1675	Reverse transcriptase (RNA-dependent DNA polymerase)	P:GO:0015074; F:GO:0003676	P:DNA integration; F:nucleic acid binding	#N/A	#N/A	RVT_2,rve	IPR036397 (G3DSA:3.30.420.GENE3D); IPR036397 (G3DSA:3.30.420.GENE3D); IPR013103 (PFAM); IPR050951 (PANTHER); IPR001584 (PROSITE_PROFILES); cd09272 (CDD); IPR012337 (SUPERFAMILY)	L	hypothetical protein K3495_g12084, partial [Podosphaera aphanis]
aug-contig_11-processed-gene-29.158	MEESLLLDFPNGECAPLPDSTIFSSEAEAFGWAQRQASTGGYAFSNLYKNKSKVTGDIILSCYNCDKGPKTYQNKPTTTSKSKQRDGTGSKKCGCQYKITIKPNESKKWVIIPKKSHNHGRNSSSIAHPAHRIAALQNTLRAEILNAANSGSSISQIMSAFREREGFNLIGKDISNIIQKERQKQLGGMTPLQWLLKELQDNGYNTRFETKDGNILSKLMYLHPQAIQLWKDHPDVLLMDCTYKTNRFNMPILNICGVTGGNKVIQLGLVFLSSEKENDYSWVLQQLKQIMTLEAIRAPLSIVTDRELALMKSLEAHFSDTPHLLCRWHVNMNVLAKSKKYFPKPTKKGNSYVRSPIFVEFLKQWNAVLAATSEETYKQEVAKLEAMAPKDAYIYVERT…	753	#N/A	#N/A	#N/A	#N/A	#N/A	#N/A	IPR018289 (PFAM); IPR052579 (PANTHER); cd07177 (CDD)	#N/A	hypothetical protein K3495_g3010 [Podosphaera aphanis]
aug-contig_11-processed-gene-29.162	MKPSESESTKNTRPRSGENELGSHDHDQEEAKTRDKSPEISDSKSRDSSEEGELEETSIERDECHNQASEDLGKSSVPPLPSEPLPETAQEIDDGWAPIWEEKLKGFYFYNRFTGASQWTNPRVPETSAAVSTLGPPGVDTPSRVSPAEPPPIVTSSGYNPAIHGDYDPNAWYAQPAQTNLALEISSQTSDLSAHYTATAAFNRFTGRFQNPEITAENFNDENKSRRQMNAFFDVDAAANSHDGRSLKAERSGKKLSKTELKQFKEKRKMKKEERRRAWLRD	282	WW domain	F:GO:0005515	F:protein binding	#N/A	#N/A	WW	G3DSA:2.20.70.10 (GENE3D); IPR001202 (PROSITE_PROFILES); IPR036020 (SUPERFAMILY)	A	hypothetical protein Golomagni_04320 [Golovinomyces magnicellulatus]
aug-contig_11-processed-gene-29.163	MEESLLLDFPNGECAPLPDSTIFSSEAEAFGWAQRQASTGGYAFSNLYKNKSKVTGDIILSCYNCDKGPKTYQNKPTTTSKSKQRDGTGSKKCGCQYKITIKPNESKKWVIIPKKSHNHGRNSSSIAHPAHRIAALQNTLRAEILNAANSGSSISQIMSAFREREGFNLIGKDISNIIQKERQKQLGGMTPLQWLLKELQDNGYNTRFETKDGNILSKLMYLHPQAIQLWKDHPDVLLMDCTYKTNRFNMPILNICGVTGGNKVIQLGLVFLSSEKENDYSWVLQQLKQIMTLEAIRAPLSIVTDRELALMKSLEAHFSDTPHLLCRWHVNMNVLAKSKKYFPKPTKKGNSYVRSPIFVEFLKQWNAVLAATSEETYKQEVAKLEAMAPKDAYIYVERT…	753	#N/A	#N/A	#N/A	#N/A	#N/A	#N/A	IPR018289 (PFAM); IPR052579 (PANTHER); cd07177 (CDD)	#N/A	hypothetical protein K3495_g3010 [Podosphaera aphanis]
aug-contig_11-processed-gene-29.169	MANKEINIKGMSVSGAVTDFNRKIISQEALKFLALLHRSFNGIRKELLQRRIIKQEELDKGFLPDFLPETKHIREDDSWKGAIPAPGLVDRRVEITGPTDRKMVVNALNSDVWTYMADFEDSNAPTWDNMINGQVNLYDAIRRKIHFRQGQKEYTLRTDRTLPTLIVRPRGWHLDEKHLIIGEEPISGSLFDFGLYFFHNAKELIKRGAGPYFYLPKIESHLEARLWNDVFNLAQDYIGIPRGTIRATVLIETILAAFEMDEIIYELRDHSSGLNCGRWDYIFSVIKKFRQHGSFVLPDRSAVTMTVPFMDAYVKLLIQTCHRRQVHAMGGMAAQIPIKNDKLANEKAMQGVYNDKLREVKSGHDGTWVAHPTLASIASDVFNTHMPRPNQIFAHKSDF…	542	Belongs to the malate synthase family	P:GO:0006097; F:GO:0003824; F:GO:0004474; C:GO:0005737; C:GO:0005782	P:glyoxylate cycle; F:catalytic activity; F:malate synthase activity; C:cytoplasm; C:peroxisomal matrix	K01638	map00620,map00630,map01100,map01110,map01120,map01200	Malate_synthase	G3DSA:1.20.1220.12:FF:000001 (FUNFAM); G3DSA:3.20.20.360:FF:000001 (FUNFAM); IPR001465 (PFAM); IPR048356 (PFAM); IPR006252 (PIRSF); IPR044856 (G3DSA:1.20.1220.GENE3D); IPR046363 (G3DSA:3.20.20.GENE3D); IPR048355 (PFAM); IPR006252 (NCBIFAM); PIRSR015582-2 (PIRSR); PIRSR001363-1 (PIRSR); PIRSR601465-50 (PIRSR); IPR006252 (PANTHER); IPR006252 (CDD); IPR011076 (SUPERFAMILY)	H	Malate synthase, glyoxysomal [Golovinomyces cichoracearum]
aug-contig_11-processed-gene-29.179	MSLNFLLISILFSTFYSIVTAHFTLDYPQSRGLNEDEQDQFPCGGQNTISKQRTLYPLTGGAISLTMDHPKSNVQVLIAFESEPTTSFNTVLRPTFTQYGIGSFCMTNINLPSSLHVSEGTNATIQIITNGDPDGGLYQCADITFGISAFDFEVCQNSTGVTTSKDNLRGNANETSLDGQKSEKSGAIHFWPTYLSYIIFPAIFTYAKILF	211	Expression library immunization antigen 1	#N/A	#N/A	#N/A	#N/A	#N/A	IPR046530 (PFAM); IPR046936 (PANTHER); cd21176 (CDD)	#N/A	Uncharacterized protein GcC1_203019 [Golovinomyces cichoracearum]
aug-contig_11-processed-gene-3.17	MRALHLQSGLPLKFWPIILTASINSLNITPNSVASKLPYRDVFQKIPNVKHLHQFGCRAFWLDPDQNKLKSKTKDGIYVGTEFTGGHIILNPDTQRTVVRRDIRVHEDSFPLKSQILGVQNPNRCIIELELSGPKAQLWSKAMDDEINNMVRNNVWTLVPKADANGKLMTGKWILKEKLNGQMKARWCAHGFSEPFADDTYADVLPPTTFRMLLAFAATYNLHIQHVDITAAFLHAEIDRPIYIEQPHTREQPGNLVCKLHKSIYGLKTAPRRWQRKLRQVLHNLGFKPLKYNANIFRRGQTIISKYVDDFMILSVSTTQIQHTINALANAFQLKDLGNMTKFLGIDVERKSDGIYIDLQDKIDTLCDEMDSTWGNNTTPKGTSGYLFLINGTPIARSS…	409	Reverse transcriptase (RNA-dependent DNA polymerase)	#N/A	#N/A	#N/A	#N/A	#N/A	IPR013103 (PFAM); IPR043502 (SUPERFAMILY)	#N/A	hypothetical protein K3495_g14889, partial [Podosphaera aphanis]
aug-contig_11-processed-gene-3.19	MRDNLGEIRHGEEELLVSLDDYRHDTTSAPPESLINYVAEIRRHSLSRSMAAERQLQRIDVDLPRHIAVGMIPKKIHEVTHFARYIDRLAEEIATKSGKIITHFVDLGSGQNYLGRTLASPPFNKKIIAIDNKQCNITGAKKMDISASITKKDLVLRNKKLYRLNQIISKPVELLSSKERKIMRQHNNGGEDDDECGGERGRRLPKNHPPSQPGSQTDYRQSRELASNDNNSSGCMLKEQEEKEKGHIYYIHHQVENGDFGNVLSQMEPQLSTPFGNEKIGFKDYQSFSLKESEVATKEDKNKGSLTKCDKNINLMTVSIHSCGNLSHHGIRSLILNESVHAIAIIGCCYNLLSERFSEPTMKHPLLHPRRQLIEKAKVSTITSSSSSFYSSNPLIDEK…	625	Methyltransferase domain	#N/A	#N/A	#N/A	#N/A	Methyltransf_32	IPR025714 (PFAM); IPR052220 (PANTHER)	A	Methyltransferase-like protein 25 [Golovinomyces cichoracearum]
aug-contig_11-processed-gene-3.21	MSDPRQTSNTSSQYIQPASYFFSHATQSHSKFLVKKNADAKKKKIPFSSLDKTIVRAEQVPKDNSTESNTDSNMSAMDVEELSASSERLSNRSKPYRKVLEETHEKSDIDYFAFTPQNLFESQHAFWYANWTLSRQNDPRWLELGEWRFFAIDYFNTRNLDCGSFWMDCKDIPSLSEILDIHPDDRELARRVYFTSENYLIIRNYLKAIQSILDEVQLTLYGMLPEIIQVFTSQPDPSAQAACAMISAVVDTLINVGVTAVTATHSAEQASRWYKKIVTSKWIPDSVVRWLRNQDQFNAWGEITPISNSEIESLSTRVAELFETAKSSYPPHSKPELVPGLQKIKDSYIKIKKNFPWVKPITQMPATLRIGLRFNLQILVKEHARLHIESNSLGGDGIC…	915	#N/A	#N/A	#N/A	#N/A	#N/A	#N/A	#N/A	#N/A	hypothetical protein GcC1_179023 [Golovinomyces cichoracearum]
aug-contig_11-processed-gene-30.16	MEESLLLDFPNGECAPLPDSTIFSSEAEAFGWAQRQASTGGYAFSNLYKNKSKVTGDIILSCYNCDKGPKTYQNKPTTTSKSKQRDGTGSKKCGCQYKITIKPNESKKWVIIPKKSHNHGRNSSSIAHPAHRIAALQNTLRAEILNAANSGSSISQIMSAFREREGFNLIGKDISNIIQKERQKQLGGMTPLQWLLKELQDNGYNTRFETKDGNILSKLMYLHPQAIQLWKDHPDVLLMDCTYKTNRFNMPILNICGVTGGNKVIQLGLVFLSSEKENDYSWVLQQLKQIMTLEAIRAPLSIVTDRELALMKSLEAHFSDTPHLLCRWHVNMNVLAKSKKYFPKPTKKETYKQEVAKLEAMAPKDAYIYVERTWLIWKEKIVRFWVDKQLHFGYTVTST…	727	MULE transposase domain	#N/A	#N/A	#N/A	#N/A	MULE	IPR018289 (PFAM); PTHR47718 (PANTHER); cd07177 (CDD)	#N/A	hypothetical protein K3495_g3010 [Podosphaera aphanis]
aug-contig_11-processed-gene-30.3	MEILSQVPKSVCGFFAIIGFLFLGRKVLRKYGPKGTYALVTGASDGLGKEYAIQLAQKGFSLILVSRTASKLETLSTEISQKYVGSGVQVKTMAMDFSENKDDDYAKLESLIEDLDIGVLVNNVGQSHSIPVPFILTPKKEMTDIIGINVTATLRVTQLVAPGMVRRKRGLILTMGSFGGLLPTPLLATYSGSKAFLQQWSTALGGELKSSNIDVELVISYLVTTAMSKIRKTSLLIPNPRNFVRSVLSKIGRSGGAQNMAYTCTPFWGHGLMQWWLENTFGLGTAYVVEKNRQMHESIRKRALKKAERDAKRN	314	Component of the microsomal membrane bound fatty acid elongation system, which produces the 26-carbon very long-chain fatty acids (VLCFA) from palmitate. Catalyzes the reduction of the 3-ketoacyl-CoA intermediate that is formed in each cycle of fatty acid elongation. VLCFAs serve as precursors for ceramide and sphingolipids	P:GO:0030497; F:GO:0045703; C:GO:0005783	P:fatty acid elongation; F:ketoreductase activity; C:endoplasmic reticulum	K10251	map00062,map00140,map01040,map01100,map01110,map01212	adh_short	IPR002347 (PRINTS); G3DSA:3.40.50.720:FF:000317 (FUNFAM); PIRSF000126 (PIRSF); G3DSA:3.40.50.720 (GENE3D); IPR002347 (PFAM); PIRSR617711-2 (PIRSR); PIRSR611284-2 (PIRSR); PIRSR614007-2 (PIRSR); PIRSR614007-1 (PIRSR); PIRSR000095-1 (PIRSR); PIRSR617711-1 (PIRSR); PIRSR611284-1 (PIRSR); PTHR43086 (PANTHER); IPR027533 (HAMAP); cd05356 (CDD); IPR036291 (SUPERFAMILY)	Q	Very-long-chain 3-oxoacyl-CoA reductase [Golovinomyces cichoracearum]
aug-contig_11-processed-gene-32.125	MEESLLLDFPNGECAPLPDSTIFSSEAEAFGWAQRQASTGGYAFSNLYKNKSKVTGDIILSCYNCDKGPKTYQNKPTTTSKSKQRDGTGSKKCGCQYKITIKPNESKKWVIIPKKSHNHGRNSSSIAHPAHRIAALQNTLRAEILNAANSGSSISQIMSAFREREGFNLIGKDISNIIQKERQKQLGGMTPLQWLLKELQDNGYNTRFETKDGNILSKLMYLHPQAIQLWKDHPDVLLMDCTYKTNRFNMPILNICGVTGGNKVIQLGLVFLSSEKENDYSWVLQQLKQIMTLEAIRAPLSIVTDRELALMKSLEAHFSDTPHLLCRWHVNMNVLAKSKKYFPKPTKKGNSYVRSPIFVEFLKQWNAVLAATSEETYKQEVAKLEAMAPKDAYIYVERT…	736	#N/A	#N/A	#N/A	#N/A	#N/A	MULE	IPR018289 (PFAM); IPR052579 (PANTHER); cd07177 (CDD)	#N/A	hypothetical protein K3495_g3010 [Podosphaera aphanis]
aug-contig_11-processed-gene-32.126	MSSPSSRLYNEKKTDKNPKGLTLSVIGCGTMGSALLGRLMEACERAREKGDEVPFDRFFATVNSEESRFNLLSKFSAHQSYFRAYSGENDLWMDSADVVILAFKPEMVEQILSQKGVRDALAGKLVISVIVGTPQKRLLDAISLSKPSEVVEKGSSLYSDISYVPTDKPPYIKRAMMNIAAEYGQSMTVIETPPSIEINDGFEKLTKWIFEQCGKISFVGCETFDIAGVLSGASGALLSVALEGILDGAVSQGLVRTQAKELVTQSLISLATLLENGAHPAVMRENFTIPHGTTIFGLMSLEEDRVRWAYTKATIASSERSKDIGGRS	328	Pyrroline-5-carboxylate reductase dimerisation	P:GO:0006561; P:GO:0055129; F:GO:0004735	P:obsolete proline biosynthetic process; P:L-proline biosynthetic process; F:pyrroline-5-carboxylate reductase activity	K00286	map00330,map01100,map01110,map01130,map01230	F420_oxidored,P5CR_dimer	IPR029036 (PFAM); IPR028939 (PFAM); G3DSA:1.10.3730.10 (GENE3D); G3DSA:3.40.50.720 (GENE3D); PIRSR000193-1 (PIRSR); PTHR11645 (PANTHER); IPR000304 (HAMAP); IPR008927 (SUPERFAMILY); IPR036291 (SUPERFAMILY)	E	Pyrroline-5-carboxylate reductase [Golovinomyces cichoracearum] RKF79868.1 Pyrroline-5-carboxylate reductase [Golovinomyces cichoracearum]
aug-contig_11-processed-gene-32.131	MKNSGHHGTESTSRTVTGMNNSDAKKLKKRKVLLMGKSGSGKSSMRSIIFSNYVAKDTRRLGATIDVDLSHVKFLGNLTLNLWDCGGYYRQYKNSDSGTVISHLASTELPNPLSHHLSQAYPTGSQDAFMENYLTQQRQHVFSNVGVLIYVFDIESRDFNRDLLTYRSIVTAIAQFSSTASIYILIHKMDLVVPNLREDLYFDRVSLIRSKSLSFSPIPFATSIWDQSLYKAWAEIIHDLVPNLDQIEEHLGTLGKLIMAQEVLLFERSSFLVVSSWLSEIGAENPTTDRYERLSNIIKNFKQTTSRFTGTPKSAEQFVVMEVKLLSFSMFMTKFTTNTYLAVILAPGEETFNSAVENCHLARKEFENLDSPVPKSVGRGAQ	382	Gtr1/RagA G protein conserved region	P:GO:0009267; P:GO:0010507; P:GO:1904263; F:GO:0003924; F:GO:0005525; C:GO:0000329; C:GO:0005634; C:GO:1990131	P:cellular response to starvation; P:negative regulation of autophagy; P:positive regulation of TORC1 signaling; F:GTPase activity; F:GTP binding; C:fungal-type vacuole membrane; C:nucleus; C:Gtr1-Gtr2 GTPase complex	K16185	map04140,map04150	Gtr1_RagA	G3DSA:3.30.450.190 (GENE3D); IPR027417 (G3DSA:3.40.50.GENE3D); IPR006762 (PFAM); IPR027417 (G3DSA:3.40.50.GENE3D); PIRSR038134-1 (PIRSR); PIRSR038134-2 (PIRSR); IPR006762 (PANTHER); IPR027417 (SUPERFAMILY)	U	Ras-related GTP-binding protein A [Golovinomyces cichoracearum]
aug-contig_11-processed-gene-33.1	MEESLLLDFPNGECAPLPDSTIFSSEAEAFGWAQRQASTGGYAFSNLYKNKSKVTGDIILSCYNCDKGPKTYQNKPTTTSKSKQRDGTGSKKCGCQYKITIKPNESKKWVIIPKKSHNHGRNSSSIAHPAHRIAALQNTLRAEILNAANSGSSISQIMSAFREREGFNLIGKDISNIIQKERQKQLGGMTPLQWLLKELQDNGYNTRFETKDGNILSKLMYLHPQAIQLWKDHPDVLLMDCTYKTNRFNMPILNICGVTGGNKVIQLGLVFLSSEKENDYSWVLQQLKQIMTLEAIRAPLSIVTDRELALMKSLEAHFSDTPHLLCRWHVNMNVLAKSKKYFPKPTKKGNSYVRSPIFVEFLKQWNAVLAATSEETYKQEVAKLEAMAPKDAYIYVERT…	736	#N/A	#N/A	#N/A	#N/A	#N/A	MULE	IPR018289 (PFAM); IPR052579 (PANTHER); cd07177 (CDD)	#N/A	hypothetical protein K3495_g3010 [Podosphaera aphanis]
aug-contig_11-processed-gene-33.13	MKSKSDINRTRQLISIVIVGKIVMSLSDPVAANLSGSAKLNEVTKLVKYLAEDLKENNLKREKYLETLKVYGRDPCDSDPIFTEQGIKTLAGHAFRNSSPDIFKTASGCLANALLLKAGTRQIFVDLGLATKACDFLSYENREYEFLMSRILFLTTYETNINLEELIETSKLAECVCVNLSRHADRVASQKEPIKVESIELTALIETLKLIFNLTYFCPQKSSAFSLALKDLLKLLTRLPVPEKRPLDPPIGSLVNAIINMDLATSISTFFPPLTPNLYIDICVDILNKSIRFYNDEDLEQNVTPLIALFRKANDHAPKETQSHLQRLLLPSLRDRQKILGRAESLPSKLLCQMSNPLAPKLRDSISALLFELSGKDPRKFVQNLGFGFTSGFLHNNSL…	490	Guanine nucleotide exchange factor synembryn	P:GO:0007186; F:GO:0001965; F:GO:0005085; C:GO:0005737	P:G protein-coupled receptor signaling pathway; F:G-protein alpha-subunit binding; F:guanyl-nucleotide exchange factor activity; C:cytoplasm	#N/A	#N/A	Ric8	IPR019318 (PFAM); IPR019318 (PANTHER)	T	hypothetical protein Golomagni_03768 [Golovinomyces magnicellulatus]
aug-contig_11-processed-gene-34.10	MTLRPRLPQRSDFPNINTLSIVPPPGNSTSTSVLLLLHGFGDTEVPFMKLAQSLALPATVGIAIRAPNLIPPLLTGLEAPAFHWSDDLLFNEHNFSMDSDGGFSRAICSLEEIVMNLRHRCGFEERDILILGFGQGATVGLGFIAKMEREEKPISGFGGIVAIGGGLPKETLSWIPETPSAKLKTPLLICGGNSKTNVTQEVISTLKARFADMRHVKWEKQGDEMPRNRQEMLPIMKFFARRIRSRAGVPHDAVEL	256	Phospholipase/Carboxylesterase	P:GO:0002084; F:GO:0008474; F:GO:0016787; F:GO:0052689; C:GO:0005737	P:protein depalmitoylation; F:palmitoyl-(protein) hydrolase activity; F:hydrolase activity; F:carboxylic ester hydrolase activity; C:cytoplasm	#N/A	#N/A	Abhydrolase_2	IPR029058 (G3DSA:3.40.50.GENE3D); IPR003140 (PFAM); IPR050565 (PANTHER); IPR029058 (SUPERFAMILY)	I	putative hydrolase C9G1.08c [Golovinomyces cichoracearum]
aug-contig_11-processed-gene-34.11	MEESLLLDFPNGECAPLPDSTIFSSEAEAFGWAQRQASTGGYAFSNLYKNKSKVTGDIILSCYNCDKGPKTYQNKPTTTSKSKQRDGTGSKKCGCQYKITIKPNESKKWVIIPKKSHNHGRNSSSIAHPAHRIAALQNTLRAEILNAANSGSSISQIMSAFREREGFNLIGKDISNIIQKERQKQLGGMTPLQWLLKELQDNGYNTRFETKDGNILSKLMYLHPQAIQLWKDHPDVLLMDCTYKTNRFNMPILNICGVTGGNKVIQLGLVFLSSEKENDYSWVLQQLKQIMTLEAIRAPLSIVTDRELALMKSLEAHFSDTPHLLCRWHVNMNVLAKSKKYFPKPTKKGNSYVRSPIFVEFLKQWNAVLAATSEETYKQEVAKLEAMAPKDAYIYVERT…	790	#N/A	#N/A	#N/A	#N/A	#N/A	#N/A	IPR018289 (PFAM); IPR052579 (PANTHER); cd07177 (CDD)	#N/A	hypothetical protein K3495_g3010 [Podosphaera aphanis]
aug-contig_11-processed-gene-34.14	MSSIIPNQKAREMSLEHSSEYVDFINKLAIYHQKRGTYFDPEPKVGTKHMNLLRLYKAVIERGGYDVVSDEKLAWRKVGQEFNLGSSNLPAVAFQLKGVYYKYLAAYEISNHWGEEPPPREILEDLTARGGGLRTRTVQNFAPPGKRDGGINDFSEASGDDGTPSRERNASEDTPGSGGRATRGLRQQPPQRIIFQPDTGPARQSRNVSSTSHPPLQQQNHNQLIQQQHIVPTPRGASTSYIPANSSETSLAVTNYEPRTQIPLTLRPIITPGNNQSEFAKRQRILREKRLSSNSGKPQRQDKGVILPGSGFDGPNIYVRCLCALRSGIQSEQDYALHHLVKISMERGDKYRFEGFPGLAEGLIEKLLEVSSLFYNIIWKVNYLDDDNTSIDSLNALDG…	937	ARID/BRIGHT DNA binding domain	P:GO:0006355; F:GO:0003677; C:GO:0016586	P:regulation of DNA-templated transcription; F:DNA binding; C:RSC-type complex	#N/A	#N/A	ARID	G3DSA:1.10.150.60:FF:000021 (FUNFAM); G3DSA:3.30.160.60 (GENE3D); IPR036431 (G3DSA:1.10.150.GENE3D); IPR001606 (PFAM); IPR052406 (PANTHER); IPR001606 (PROSITE_PROFILES); IPR003150 (PROSITE_PROFILES); cd16100 (CDD); IPR016024 (SUPERFAMILY); IPR036431 (SUPERFAMILY)	K	hypothetical protein Golomagni_00309 [Golovinomyces magnicellulatus]
aug-contig_11-processed-gene-34.17	MTYFALPFAASSTATHSKPYSFYRNAERRKSKRKRVASSSSSSSCVSDSSGSSEDDDHNHNGRTRKDSTNELLTNPLSLSPNEILQYKVAGLALNETLPSVPEWPHRGFPERVMLSPWNRKQREQSGDKREKEITLRQEPHTNSSSSSGAQRVGTEGSGRAPQGHELRVHHIHVLTTALHKCLLARDITRARRAWGLLIRMQISGQGFDFKSSGYWGIGAELLIRSLNASQSTLVRISGGQESDIASEISDGERSCPTSSSTLNSPTKRGWNIAEGMERAADYYERLIVAYPFKRQFSNNVSALTWWPVMIGCEIYGIQHKQREALQKLEKDKIFDGDEPNQFENIYEYDQIESDISEEVSDSDQKRAEEQRLKKQEYFWQAENQIRLVTLEAAEKIRA…	564	RNA polymerase I specific initiation factor	P:GO:0006361; P:GO:0042790; F:GO:0001164; F:GO:0001181; F:GO:0017025; C:GO:0070860	P:transcription initiation at RNA polymerase I promoter; P:nucleolar large rRNA transcription by RNA polymerase I; F:RNA polymerase I core promoter sequence-specific DNA binding; F:RNA polymerase I general transcription initiation factor activity; F:TBP-class protein binding; C:RNA polymerase I core factor complex	#N/A	#N/A	ECM11,RNA_pol_I_TF	IPR007224 (PFAM); IPR008160 (PFAM); IPR053029 (PANTHER)	#N/A	hypothetical protein Golomagni_04959 [Golovinomyces magnicellulatus]
aug-contig_11-processed-gene-35.13	MDKKTCNSELVDEPALSMNIPSETHIKYESTYSDDSIYDVSFQSPSLKRQRSVQSQDTADKQQRIDSENVSVGSSDLAAFLVRATSCASPNYAFPKTETETIFGTGPTECDNLNYVHRDTLNQSMCMRILSLPMLESLATQIISILAQESYHNIIKIVTTPETEAGQAYATLKSLFDQAKKIYCYQGLFLSADALNLKEPEERTVIRTSNLATFVCSVFGGHDVGFLELNDQFIKTFTVEGVPLQKEAGDLYLNLKTQIYLSAVSQEEQEKTREDILEDLFPNDLDRLLQSRHLNQPLSQSEVEFMGSYVTRREFLGNAPIDLDSIQALSENFSWEDFLKQMAIYLSKLSLLAPFMKRYNLNASLRAPSSCGQEHTLSSIEDDLGLQVELAAKQTLESL…	658	Telomere repeat binding factor (TRF)	P:GO:0010833; F:GO:0003691; F:GO:0042162; F:GO:0042803	P:telomere maintenance via telomere lengthening; F:double-stranded telomeric DNA binding; F:telomeric DNA binding; F:protein homodimerization activity	#N/A	#N/A	Myb_DNA-binding,TRF	G3DSA:1.10.10.60:FF:000137 (FUNFAM); G3DSA:1.10.10.60 (GENE3D); IPR013867 (PFAM); IPR052833 (PANTHER); IPR017930 (PROSITE_PROFILES); cd11660 (CDD); IPR009057 (SUPERFAMILY)	K	hypothetical protein Golomagni_04967 [Golovinomyces magnicellulatus]
aug-contig_11-processed-gene-35.6	MATSFPGFASATSPEKVNYTNFSMSSNKRINGHSPFPQKLKNFFRINIQNANGDKHDGGLKSEPRSYFRQSKFFPGSGRHRATTVPHENIIFNGKETDSVAHANPYFVHRVSPALKHQDEETIVPIKTPGRDELARKLRRVASAPNAQGLFSKGKGTLDRPSTSELDNESSAYKLNNGSQFSLAKMKSPVGRVLTMHGLSAPNDLGVLNQGTLHDLLPIRRIYSSNSIKVRTVEVGPTSFDKIKLIGKGDVGKVYLVREKKTSRLFAMKVLSKKEMIKRNKIKRALAEQEILATSNHPFIVTLYHSFQSEDHLYLCMEYCSGGEFFRALQTRPGKCIPEDDARFYAAEVTAALEYLHLMGFIYRDLKPENFDLSKQSDPGGKPTMILGRNGPSTNSLPT…	613	Serine/Threonine protein kinases, catalytic domain	P:GO:0006468; F:GO:0004672; F:GO:0005524	P:protein phosphorylation; F:protein kinase activity; F:ATP binding	#N/A	#N/A	Pkinase	G3DSA:3.30.200.20:FF:000078 (FUNFAM); G3DSA:1.10.510.10:FF:000121 (FUNFAM); G3DSA:1.10.510.10 (GENE3D); IPR000719 (PFAM); G3DSA:3.30.200.20 (GENE3D); PIRSR000620-1 (PIRSR); PIRSR000554-2 (PIRSR); PIRSR000636-2 (PIRSR); PIRSR000660-1 (PIRSR); PIRSR037281-2 (PIRSR); PIRSR637770-2 (PIRSR); PIRSR037393-2 (PIRSR); PIRSR000624-2 (PIRSR); PIRSR000666-2 (PIRSR); PIRSR000550-3 (PIRSR); PIRSR000556-1 (PIRS…	#N/A	hypothetical protein Golomagni_00735 [Golovinomyces magnicellulatus]
aug-contig_11-processed-gene-36.6	MANPESPNSSRDIKVTETTDESNPVAPAPEPKITTRKDASLKEFLSKMNDYAPIIPDAVTNYYLTKAGLPPPPQTDPRLARLLALATQKFIADIAADAYQYSRIRSSNSSNSNNPMGNLGAAAGFPVPGQPSTAPGGKDQQGRGGPLGIQRPGFGGGGQGGSQNRTVLTMEDLGMAVGEYGVNVKRGEFYR	191	Functions as a component of the DNA-binding general transcription factor complex TFIID and the transcription regulatory histone acetylation (HAT) complexes SAGA and SLIK. Binding of TFIID to a promoter (with or without TATA element) is the initial step in preinitiation complex (PIC) formation. TFIID plays a key role in the regulation of gene expression by RNA polymerase II through different activ…	P:GO:0006352; P:GO:0006367; F:GO:0016251; F:GO:1990841; C:GO:0000124; C:GO:0005634; C:GO:0005669	P:DNA-templated transcription initiation; P:transcription initiation at RNA polymerase II promoter; F:RNA polymerase II general transcription initiation factor activity; F:promoter-specific chromatin binding; C:SAGA complex; C:nucleus; C:transcription factor TFIID complex	K03134	map03022,map05168	TFIID_30kDa	IPR003923 (PIRSF); IPR003923 (PFAM); IPR003923 (PANTHER); IPR003923 (CDD)	K	Transcription initiation factor TFIID subunit 10 [Golovinomyces cichoracearum]
aug-contig_11-processed-gene-37.103	MAVFVADDLFKERFPESEFIGYPRDQSKDLIARKPDVLNDEDHDDDERSNDDLSGMAESIMKSKSDENGQAMHVGTPTKLKLDPKDPLRPRRKKARRACHACQRAHLTCGDERPCQRCIKRGLADACQDGVRKKAKYLHDAPPEALRPVLGPNYKPNYSQPKHARPTNGYSMTRRGSENQSNRISGLFSSEVTPLYPIFNQSDTMPPPLQARLPMDGQSSTISSSPPSFGRHVPSAIHNISIPTPISNENQASFENASLFDQSNPVFFNFDLEGLNFGNYYGALEFGMLGHISSGAAEISLKDQIGSIPLQGLGDVNLNGNIYGNGMSNYNHIYPNDMINFANQPESQIFPAHQSIPNAFAIATGPQSQYSPSVEASPSVTGAYENSPTTATFTPNSTP…	738	Riboflavin kinase	P:GO:0006355; P:GO:0009267; F:GO:0000977; F:GO:0000981; F:GO:0003700; F:GO:0008270; C:GO:0005634	P:regulation of DNA-templated transcription; P:cellular response to starvation; F:RNA polymerase II transcription regulatory region sequence-specific DNA binding; F:DNA-binding transcription factor activity, RNA polymerase II-specific; F:DNA-binding transcription factor activity; F:zinc ion binding; C:nucleus	#N/A	#N/A	Flavokinase	IPR036864 (G3DSA:4.10.240.GENE3D); IPR056751 (PFAM); IPR050335 (PANTHER); IPR001138 (PROSITE_PROFILES); IPR001138 (CDD); IPR036864 (SUPERFAMILY)	H	Transcription activator of gluconeogenesis [Golovinomyces cichoracearum]
aug-contig_11-processed-gene-37.104	MLASWASQAKLACQCNFTTVFSQHGFRTTAKKSARVGDIFTAFYSTIFAAAALADSKAKKRRLHEWDRLIAETQEELLAGEVVFSNYPNTEQSNHASDFYQSTVVEDGGAKNLSSHHQSSQIFRVSESNQPRIVNVDASFVWARSLRFSPQRPVLYLSMSGRNLFYQRRGFNDKNEIVLNNISCGTSKRLPETENFIHEEPDPDAPERDISDKTELNILQININGLVRRLLEMSKFYEISSTDELASVDSETRIQLENMRQRLNSLEASFECLPLYKYDGIDVDQQQARELNIILWSICRKSKAEEASLRLMIAKISYNLLISAVPPNIGTYNLLLHELALLGCHNYAEELLCSFWFSRLRPNKRTIELILLHYKNTKNKDGLNLMIKKMRGVDGNLMQ…	810	#N/A	#N/A	#N/A	#N/A	#N/A	#N/A	#N/A	#N/A	putative pentatricopeptide repeat domain-containing protein [Golovinomyces cichoracearum]
aug-contig_11-processed-gene-38.112	MALSTPTIPSGIKRSRDSTQTSSAGVKQKSGKKDGKFTKKIDARTIVTQTAEAALKNGQLDVEAFLRSREFEIKALQNGMQKAKKNLSTKALQKVPRDMRRRTASHNVKRLPRRLQARAAKEMREGNTPTVTANKRKPRSSRGHLRAETSKKLALLASKKRAFKNTDGKSSGIHTRAPRPKLRNNELNKPPIPKSKFRKRQVHKNWLPTHVWHAKRSKMTEPKNPLWRFAVPITPTDKSYRPTHRASGVRGAIIWDMSYMSSICIEGSQSGLELFLKKVGLTEPWLWEEKGLKWRDGKRSWNGWLSKCIKDKFRFICPSTIIWCPTESNSGNVVAAKKPSKVSKRRILVRIHPAAFLEVWTEFLRLSKAQNPVIHIQDLRFEIGSIDVTGPGSTEALLG…	884	Ribonucleases P/MRP protein subunit POP1	P:GO:0001682; P:GO:0008033; C:GO:0000172; C:GO:0005655	P:tRNA 5'-leader removal; P:tRNA processing; C:ribonuclease MRP complex; C:nucleolar ribonuclease P complex	K01164	map03008,map03013	POP1,POPLD	IPR055079 (PFAM); IPR012590 (PFAM); IPR009723 (PFAM); IPR039182 (PANTHER)	A	Ribonucleases P/MRP protein subunit pop1 [Golovinomyces cichoracearum]
aug-contig_11-processed-gene-39.19	MPDSSRQNVGQQAAKKITSKSQKSSPDVVSKTVSVGNVKIVSSIQPNKQKSANPGKPDESEFNSSGSQNIDGGSSFLGSAKNAADNTVNSAKKSADNATESTKNVASDMTDSAKSSANKAADSAKSSAKNTTESTKNVANKAADSAKGSAKNATESTKNVASDMTDSAKSSAKNTTESTKNVANKAADSAKGSAKNATESTKNVASDMTDSAKSSAKNATESTKNVANDMTDSAKSSANKAADSAKGSAKNATESTKNVASDMTDSAKSSAKNATESTKNVASDMTDSAKSSAKNATESTKNLASDASGSMRSAADRATNSAGSLASNAAESTKDVASDMTDSAKSTANKAANSAKSSADNATESAKNVASDASGSMRSAADRATNSAKSLAINATGSM…	693	#N/A	#N/A	#N/A	#N/A	#N/A	#N/A	G3DSA:1.10.287.700 (GENE3D); G3DSA:6.10.280.100 (GENE3D); G3DSA:1.20.120.20 (GENE3D); PTHR47372 (PANTHER)	#N/A	hypothetical protein GcM1_107003, partial [Golovinomyces cichoracearum]
aug-contig_11-processed-gene-4.23	MAGESAGVAENSQNNTTRQPDTTEQIAATGTVASVPMDKNLEIIRRLLKKLRNVYTGEGTVKDLPEEPDVAAAIKAFNIHKKEWEQCRAKSTPIEERMLALEEVVRKSLAEPAQKAGSSPVSGPPAQKTYASVVAPPMMKTAVRIRVEGAKDLQPAELLQRAKEHIPGAYAVRQMRSNDTEVYVQSASQRDTALNMAQPEGLKILRHDFPVEVCGVPLRTKIEGGKNANNNELITEIVNATKVRIPEFKINRIRWLHDGKEVERAKKNGRTRGSVVLSLPTETLQEQVVRHGIVINAMLYTAQVWSPRAQPKQCYNCSQWGHTQASCGKKAQCGECAGAHQTRDCPRKRVSCCNCGKEHRSWQRGACRTYQVYKGSVQKARLELLERTAEIRKEKVPTM…	473	Encoded by	F:GO:0003676; F:GO:0008270	F:nucleic acid binding; F:zinc ion binding	#N/A	#N/A	#N/A	IPR001878 (PROSITE_PROFILES); IPR036875 (SUPERFAMILY)	#N/A	AIR1 domain-containing protein [Blumeria hordei DH14]
aug-contig_11-processed-gene-4.26	MGSEVLIIGAGPTGLMLALELSREQIPFRILDNHSSSKIAYQSRSIVIHSRTLELLSRHDLTDSFIAAGLLIEEIRFFLRHTLNGKNSYPGSLMNDTIYKKPLIIRQPITEQLLEKRLSEYGVVVERGASAEKIVMDQDGEGVSVLVQHKIQDKEKKGREELIKCKYVVGCDGANSTVRKFAGIDFEGTSYAQELILVDAQVDWDHKKCPHVFTDKGFVVFLPLDEKDIYRIICRRPTNDTSVNSTSSNLSSGSFSYQEPSLSEFYDTVNSSVPGTTRIHSPIWSSSFRVSRRLASTYSVGRIFLAGDAAHVHAPVGGQGMNTGIQDAVNLGWKLARVLKSTAPASLLNSYNIERHKVGSDTVKATDRMFNILITTNPLKIWLRNFIWRWVLPYFVKPD…	559	FAD binding domain	F:GO:0016491; F:GO:0071949	F:oxidoreductase activity; F:FAD binding	#N/A	#N/A	FAD_binding_3	PR00420 (PRINTS); G3DSA:3.40.30.120 (GENE3D); IPR002938 (PFAM); G3DSA:3.30.70.2450 (GENE3D); IPR036188 (G3DSA:3.50.50.GENE3D); IPR012941 (PFAM); IPR050641 (PANTHER); IPR036249 (SUPERFAMILY); IPR036188 (SUPERFAMILY)	CH	putative aromatic compound monooxygenase YhjG [Golovinomyces cichoracearum]
aug-contig_11-processed-gene-40.12	MSPDLIRICVVGGNSVSAFLSWRLQATNACDVTLVWKSGFDAVSQYGISFKSTSFGNERFKPRHVVRAPEEAGGLNKGAFDFVLLCVKALPDVYDLASVIESVVTVKHTCILVNTTHTLGIEAQLEARFPSNVILSLVSGAEITQLGASEFEHKGSTEIWIGPANKNSTISSCEQAEMADALAMTLNNGQVDCHVSKNIRQQQYERMIGPIAFHPLSVVFDTPSHAVLIEKIGVRIMIQEILDELLLVATAQECTFSPDFKEKIIKEMIQPTNFNSIMFQDYAARRPMEVETYLGSPIKQAQSSGVRIPRIETIYAILHNLNIVNQKKDHPMVSPSVNSSSTRNSSAPPTPRLMNGGPVNGSIPGPGSAIAGRGRGRTPSMNVSQPSPMRRGQPTNGVN…	770	Ketopantoate reductase PanE/ApbA	C:GO:0005737	C:cytoplasm	#N/A	#N/A	ApbA,ApbA_C	G3DSA:3.40.50.720:FF:000424 (FUNFAM); G3DSA:1.10.1040.10:FF:000017 (FUNFAM); G3DSA:3.40.50.720 (GENE3D); IPR013332 (PFAM); IPR013328 (G3DSA:1.10.1040.GENE3D); IPR013752 (PFAM); IPR051402 (PANTHER); IPR008927 (SUPERFAMILY)	H	putative 2-dehydropantoate 2-reductase [Golovinomyces cichoracearum]
aug-contig_11-processed-gene-40.17	MNQIDRQLSTRRPLGEATRRLTPKHESTKAKCSHKKCNQSFKQSNYPPQNLLNNSIENPRVSALLHDHEIGAGNWASSLLAVSSSSGGKLKSCIGPWKLGKTLGRGSSARVRLARHQITGQEAAVKIVLKASAQMSQSGSLANFEMAESKLHDNNGELRHMPAGIEREVAIMKLIQHPNILRLYDIWENRKEIYLCLEYVDNGELFEQIAKKGGLEEEEAMGYFRQILSAVEYCHSFNICHRDLKPENILLTSAGQIKIADFGMAALHQGPGHQLSTSCGSPHYAAPELIKGSKYHGNVVDIWSMGVILFATLAGRLPFDAQGISKKWLTPLLEKIKKGQYEMSSNFSPEAKSLIRRMLQVNPKDRITLSQIWKHPLLKKYDYLDNLGQESHLLSPSAD…	1039	Fungal kinase associated-1 domain	P:GO:0006468; P:GO:0035556; F:GO:0004672; F:GO:0004674; F:GO:0005524; C:GO:0005737	P:protein phosphorylation; P:intracellular signal transduction; F:protein kinase activity; F:protein serine/threonine kinase activity; F:ATP binding; C:cytoplasm	K02515,K06668,K18680	map04011,map04111	Fungal_KA1,Pkinase	G3DSA:1.10.510.10:FF:000394 (FUNFAM); IPR031850 (PFAM); IPR000719 (PFAM); IPR043024 (G3DSA:3.30.310.GENE3D); G3DSA:1.10.510.10 (GENE3D); PIRSR628788-1 (PIRSR); PIRSR000666-1 (PIRSR); PIRSR000619-1 (PIRSR); PIRSR000620-1 (PIRSR); PIRSR000632-1 (PIRSR); PIRSR000551-50 (PIRSR); PIRSR037921-1 (PIRSR); PIRSR038189-1 (PIRSR); PIRSR000617-1 (PIRSR); PIRSR000554-2 (PIRSR); PIRSR000604-1 (PIRSR); PIRSR000…	D	hypothetical protein Golomagni_04215 [Golovinomyces magnicellulatus]
aug-contig_11-processed-gene-40.21	MLVPSSGRKRSRSINESDNDDDDTEVSSASSKGTLAPSRNHNKRVKAKASISNSHSFVRQTPTQSNNFFQPEIIGNHGGDSSSKFQHGAIVWVKVVNFVTYEKAEFYPGPSLNMVIGPNGTGKSSLVCAICLGLGSSPAQLGRATQVGEFVKHNMPEAVIEIALQGPKGKNNYVIRSQIIREDNSRQWWLNGKRSHLKAVKSLVEKLSIQIDNLCQFLPQEKVAEFSALSPSELLVQTQRAAAPPEFLEKHEELKKLRKAEVALEVRNEATAQELKTHEIRQQNLEAQVQKLQERIKIQENIALLRKKIPFVEYKMAIAKHNSSKALKIAAHKLYEELEARIAPTLLSIEKKKSYVEKIDSIVRQRKAALIAIERECQQFNVAYEKLTDEISVLEVNLT…	1134	AAA domain	P:GO:0000724; F:GO:0003697; C:GO:0005634; C:GO:0030915	P:double-strand break repair via homologous recombination; F:single-stranded DNA binding; C:nucleus; C:Smc5-Smc6 complex	#N/A	#N/A	AAA_23,SMC_N	G3DSA:3.40.50.300:FF:001301 (FUNFAM); IPR003395 (PFAM); IPR027417 (G3DSA:3.40.50.GENE3D); IPR027417 (G3DSA:3.40.50.GENE3D); PTHR45916 (PANTHER); IPR027417 (SUPERFAMILY)	BDL	hypothetical protein Golomagni_03289 [Golovinomyces magnicellulatus]
aug-contig_11-processed-gene-41.81	MPYWTPTSQSPSEPYQSEPSVAPSYGAEYNFLGRHSYSPVASEGVMVSHCNLPPYANHISISGPREDHHQLSLQNHQYHQQQITHAQQPHTLAPQGPLHAPDSYGGRSPVSPIPYSPNSSLRQNAVQVYSPVQSSHQGDSMSLNRISPVSSRDHENITIAPQTSYQRPFGGYTLPAMDGALIPQVHSSDEHISMMNNNMPMDSYSQNIMEPSLYEPNLIQQQVQSDRPFKCDQCPQSFNRNHDLKRHKRIHLAVKPFPCLNCEKSFSRKDALKRHILVKSCGGGMKSESNHEGDSNLTPKTYDE	304	Zinc finger, C2H2 type	P:GO:0006357; F:GO:0000978; F:GO:0001227; C:GO:0005654	P:regulation of transcription by RNA polymerase II; F:RNA polymerase II cis-regulatory region sequence-specific DNA binding; F:DNA-binding transcription repressor activity, RNA polymerase II-specific; C:nucleoplasm	#N/A	#N/A	#N/A	G3DSA:3.30.160.60:FF:000100 (FUNFAM); G3DSA:3.30.160.60:FF:001156 (FUNFAM); IPR013087 (PFAM); G3DSA:3.30.160.60 (GENE3D); G3DSA:3.30.160.60 (GENE3D); PTHR24399 (PANTHER); IPR013087 (PROSITE_PROFILES); IPR013087 (PROSITE_PROFILES); IPR036236 (SUPERFAMILY)	#N/A	Zinc finger protein 394 [Golovinomyces cichoracearum]
aug-contig_11-processed-gene-41.84	MDWVKEWKVLLLSDQTVIAGCALVITWLYFTVTIYHWWNCEKPIHYEIRVPLPPVDSKILTRPSIRVEGSTAIQCYAPATGKFLGYVNPQSPNGIDRAILKAQEAQIQWSKTSFSQRRKVLQCIQAHILEYQRDISQVACLDSGKTLIDATLGEILVTVEKIRWTYLHGEKALKNSQRPTNLLMAYKKNHVRYEPLGVVAALVSWNYPFHNLIGPIISAIFTGNGIIVKASENTAWSAAYFTQIVKEALLVCGHSPQLVQTIVTWPQTANYLTSHPGISHITFIGSRPVAKLVAASAAKSLTPVVAELGGKDAAIILDSAKYDLPRISEILLRGSFQAAGQNCIGIERIIACPQVYDKLIKILLPRIESIRVGSVLDSPKESQVDMGAMISDASFDRLE…	599	Belongs to the aldehyde dehydrogenase family	F:GO:0016491; F:GO:0016620	F:oxidoreductase activity; F:oxidoreductase activity, acting on the aldehyde or oxo group of donors, NAD or NADP as acceptor	#N/A	#N/A	Aldedh	G3DSA:3.40.309.10:FF:000024 (FUNFAM); IPR015590 (PFAM); IPR016162 (G3DSA:3.40.605.GENE3D); IPR016163 (G3DSA:3.40.309.GENE3D); PIRSR000197-1 (PIRSR); PIRSR036489-3 (PIRSR); PIRSR617656-1 (PIRSR); PIRSR036492-1 (PIRSR); PTHR11699 (PANTHER); cd07098 (CDD); IPR016161 (SUPERFAMILY)	C	hypothetical protein Golomagni_03043 [Golovinomyces magnicellulatus]
aug-contig_11-processed-gene-42.16	MAQRQSSCVRTDNDDAVHDVKDHSFITRTHFSKDKLLSYRSPKLLYLTIFVVTLLCLGSSLRSVSKEDKAESKVGEFVLQAPFLATRDVSDQWTEVFEKMENLTYGLSPPWYPSPKGGSISSWSKSYEKAQILVEQMSLTEKVNITTGTGWMMGLAIGNTGPANKVGFPSLALQDGPAGIRYTTNITAFPAGITVGATWNKELMYLRGKAHGKEARLKGINAILGPCVGPIGRMPAGGRGWEGFGYDPALQGIAAAETIKGIQEEGVMATVKHLVGNEQEHYRQTHETRNNPNAYSTNIDDRTLHELYGWPFQNSVKAGVASVMCSYNMVNVSYACENSKLMNGYLKDELGFSGFVQSDWLAQRSGVASALAGLDMSMPGDGLEWEDGKSLWGPELTKS…	960	Fibronectin type III-like domain	P:GO:0005975; P:GO:0009251; F:GO:0004553; F:GO:0008422	P:carbohydrate metabolic process; P:glucan catabolic process; F:hydrolase activity, hydrolyzing O-glycosyl compounds; F:beta-glucosidase activity	K05349	map00460,map00500,map00940,map01100,map01110	Fn3-like,Glyco_hydro_3,Glyco_hydro_3_C	IPR001764 (PRINTS); G3DSA:3.40.50.1700:FF:000003 (FUNFAM); G3DSA:3.20.20.300:FF:000002 (FUNFAM); IPR001764 (PFAM); IPR036881 (G3DSA:3.40.50.GENE3D); IPR002772 (PFAM); IPR026891 (PFAM); IPR036962 (G3DSA:3.20.20.GENE3D); IPR013783 (G3DSA:2.60.40.GENE3D); IPR050288 (PANTHER); IPR036881 (SUPERFAMILY); IPR017853 (SUPERFAMILY)	I	putative beta-glucosidase E [Golovinomyces cichoracearum]
aug-contig_11-processed-gene-42.19	MDLVQIPKRKTSERCSREDTDGYEHAEEEDAPKKVFSAVEETLQILKLEIDAFNPSLETYRELLVEAIATIEGQQKRIDELTKKTEDTSDITKVLQEIKVIKASVAEIQNPTRVTARTWAKIAAKNTEAKGTILRIEDEMEKQEVAELSSEELVKRIGMKEVIGAHQMRNGQVKVYFSEEETEHRMAKQQDWAVKLSSTAHIAKPTYQVLVHDMPLSFDPEKREQIKELENTNLQYLRGLKIQKASWLKKVSAEGKKSGSLIVWCDEADQADMVIKKGIMWKYELKATEIFRSRFRLMQCFNCQRYGHIARNCTATAKCGNCAETHNTRECTGKKEIRCCNCCRKHRAWDLSCPLRIAAKTKATNHRTHDLGRYQDQDQPSMQTNEWQTAGSSKSKPKP…	425	Encoded by	F:GO:0003676; F:GO:0008270	F:nucleic acid binding; F:zinc ion binding	#N/A	#N/A	#N/A	G3DSA:4.10.60.10 (GENE3D); IPR001878 (PFAM); IPR001878 (PROSITE_PROFILES); IPR036875 (SUPERFAMILY)	#N/A	putative zinc finger cchc-type protein [Erysiphe necator]
aug-contig_11-processed-gene-42.23	MDLVQIPKRKTSERCSREDTDGYEHAEEEDAPKKVFSAVEETLQILKLEIDAFNPSLETYRELLVEAIATIEGQQKRIDELTKKTEDTSDITKVLQEIKVIKASVAEIQNPTRVTARTWAKIAAKNTEAKGTILRIEDEMEKQEVAELSSEELVKRIGMKEVIGAHQMRNGQVKVYFSEEETEHRMAKQQDWAVKLSSTAHIAKPTYQVLVHDMPLSFDPEKREQIKELENTNLQYLRGLKIQKASWLKKVSAEGKKSGSLIVWCDEADQADMVIKKGIMWKYELKATEIFRSRFRLMQCFNCQRYGHIARNCTATAKCGNCAETHNTRECTGKKEIRCCNCCRKHRAWDLSCPLRIAAKTKATNHRTHDLGRYQDQDQPSMQTNEWQTAGSSKSKPKP…	425	Encoded by	F:GO:0003676; F:GO:0008270	F:nucleic acid binding; F:zinc ion binding	#N/A	#N/A	#N/A	G3DSA:4.10.60.10 (GENE3D); IPR001878 (PFAM); IPR001878 (PROSITE_PROFILES); IPR036875 (SUPERFAMILY)	#N/A	putative zinc finger cchc-type protein [Erysiphe necator]
aug-contig_11-processed-gene-43.1	MTSHHGNLSDLLPVNWKSVVLSWFQEDTPSFDYGGFVVGNDERTATLYAKSSGVLAGLPFFNEIFAQADCTVSWYIEEGSWVEGGSSGKTAIARITGPVRKVLLGERVALNTLSRCSGIATQSKKMLDLVRQAGYTGILAGTRKTTPGFRLVEKYGMLVGGIDGHRHDLSSMIMLKDNHIWAKGSIKNAVQAAKKAGGFSLKVEVEVGNRTDAHEAIEAGADIIMLDNFKGDEMKALAVDLKSEWAGKRNFLLECSGGLTTENVASFITNGKLDISHHPPNFYMIQ	286	Involved in the catabolism of quinolinic acid (QA)	P:GO:0009435; P:GO:0034213; F:GO:0004514; F:GO:0016763; C:GO:0005737	P:NAD+ biosynthetic process; P:quinolinate catabolic process; F:nicotinate-nucleotide diphosphorylase (carboxylating) activity; F:pentosyltransferase activity; C:cytoplasm	K00767	map00760,map01100	QRPTase_C,QRPTase_N	G3DSA:3.20.20.70:FF:000090 (FUNFAM); G3DSA:3.90.1170.20:FF:000003 (FUNFAM); IPR037128 (G3DSA:3.90.1170.GENE3D); IPR027277 (PIRSF); IPR022412 (PFAM); IPR002638 (PFAM); IPR004393 (NCBIFAM); IPR013785 (G3DSA:3.20.20.GENE3D); IPR027277 (PANTHER); IPR004393 (CDD); SSF54675 (SUPERFAMILY); IPR036068 (SUPERFAMILY)	H	Nicotinate-nucleotide pyrophosphorylase [Golovinomyces cichoracearum]
aug-contig_11-processed-gene-46.183	MSRNDVNRYLCKLKLIQNGLLHLVEDVDNFEVLLQTKKADAESDSDRESSVESLIRRRNHFVKKSIKSTRKNKWDWSTEKNEGVAEARRTVIKSFLKSITTGRTCGNCGGISPSYRKDRYVKIFEKSLSAKDKAKMSQGNFQAVNAVELTLKDKKDVKFTNLDEGIADIDLSSDDVAEIKRAKEENLDPNGNVVEAKSTKIASAGSKSKASGVAQRFINAMEVRAQMVLLFEKDQEIINLVYDSRSTSKNSTNVSPDMFFIQTLLVPPNKYRPETKSVEGDISEAQQNTLYKTILKNAEQISRISQDIMNPDTESIYRKRDFYDLQEAWCMLQDSVNSLIDRDRNPIQGAGGKKIEDGIKQKLEKKEGLFRKNMMGKRVNFAARSVISPDPNIETNEIG…	1593	DNA-dependent RNA polymerase catalyzes the transcription of DNA into RNA using the four ribonucleoside triphosphates as substrates	P:GO:0006351; F:GO:0001054; F:GO:0003677; F:GO:0003899; C:GO:0005736	P:DNA-templated transcription; F:obsolete RNA polymerase I activity; F:DNA binding; F:DNA-directed RNA polymerase activity; C:RNA polymerase I complex	K02999	map00230,map00240,map01100,map03020	RNA_pol_Rpb1_1,RNA_pol_Rpb1_2,RNA_pol_Rpb1_3,RNA_pol_Rpb1_4,RNA_pol_Rpb1_5	G3DSA:2.40.40.20:FF:000019 (FUNFAM); G3DSA:3.30.1490.180:FF:000003 (FUNFAM); G3DSA:1.10.150.390:FF:000005 (FUNFAM); G3DSA:1.10.274.100:FF:000006 (FUNFAM); G3DSA:1.10.132.30:FF:000005 (FUNFAM); G3DSA:1.10.150.390 (GENE3D); IPR007066 (PFAM); G3DSA:2.40.40.20 (GENE3D); IPR007081 (PFAM); IPR038120 (G3DSA:1.10.132.GENE3D); G3DSA:3.30.70.2850 (GENE3D); G3DSA:1.10.357.120 (GENE3D); IPR042102 (G3DSA:1.10…	K	hypothetical protein Golomagni_01028 [Golovinomyces magnicellulatus]
aug-contig_11-processed-gene-46.184	MDRGNFPQILAPRYDSSTRISKPESAADKLASLKARVAAAVSKPKVPHPPVFPISATARGGLNVDLHPALQDLGQYKPSKTVAPKFATSIGNARPLLEKPALKAKKRLDLSGPSAEEVRNNPYFDGSLGGQTATLKNRHSKQLIFNQKGKYIQQANALRRQAALEDIKRRIAESSRKIGIDEDLDTEKNYIVEAPPDIEWWDEGLVNGKNYDNIENPESVKIDSLDSIITAYIQHPVLLEPPREKNTPAPKPMFLTSKEQAKLRRQRRMADLKEQQAKIRLGLEPAPPPKVKKGNLMRVLGEEAVKDPTAVEARVNKEIAARHLAHVEMNEKRKLTKEQLHEKLALNQEKDAAKGIYILVFKINTLANGSHRFKIAKNAEQNALTGICIMHPRFSLVIV…	504	Protein of unknown function (DUF1115)	P:GO:0000398; C:GO:0046540	P:mRNA splicing, via spliceosome; C:U4/U6 x U5 tri-snRNP complex	K12843	map03040	DUF1115,PRP3	IPR010541 (PFAM); IPR013881 (PFAM); IPR027104 (PANTHER); cd24162 (CDD)	A	U4/U5/U6 small nuclear ribonucleoprotein prp3 [Golovinomyces cichoracearum]
aug-contig_11-processed-gene-46.186	MFPSKNSGSKRGPDPEFDYDIPKLNAQFFYSSSLLIDDPLSAVPNSAGTDVKSLKHPLLPFSSDDNEALEEAWHSLISTDDGNFPKKPQNSGVSSYYNRSKSLGAENVKISNNLQEDNASKEKINHTVTAYHLRCDNPQEIQSICQKELQSDQTTTCESQKLASTGIDTEFSREDHAKKSTKEKFPDTKISRSLHISKSYQDVSKRFHSNSHKNQNLEIIRSINDRKNFTSAYLNLRDQKDQDKSSKYLFEGENDRICQVSSSIKDSLFYDQLKDSFNFSILDTNSSKETSDQRVWEAQATYKSLPSKKVRDHVLLSRARYVSSSHTFQNEDTGTTGQPFIKLPSRPCSPSKNDQIENDDERRRKRNESKTAEVPWEDLTQNLGVVSDKYVDKSQVRQK…	1073	DDHD	F:GO:0004620; F:GO:0046872; C:GO:0005737	F:phospholipase activity; F:metal ion binding; C:cytoplasm	#N/A	#N/A	DDHD	IPR004177 (PFAM); PTHR23509 (PANTHER); IPR004177 (PROSITE_PROFILES); IPR029058 (SUPERFAMILY)	IU	hypothetical protein Golomagni_05112 [Golovinomyces magnicellulatus]
aug-contig_11-processed-gene-46.187	MEESLLLDFPNGECAPLPDSTIFSSEAEAFGWAQRQASTGGYAFSNLYKNKSKVTGDIILSCYNCDKGPKTYQNKPTTTSKSKQRDGTGSKKCGCQYKITIKPNESKKWVIIPKKSHNHGRNSSSIAHPAHRIAALQNTLRAEILNAANSGSSISQIMSAFREREGFNLIGKDISNIIQKERQKQLGGMTPLQWLLKELQDNGYNTRFETKDGNILSKLMYLHPQAIQLWKDHPDVLLMDCTYKTNRFNMPILNICGVTGGNKVIQLGLVFLSSEKENDYSWVLQQLKQIMTLEAIRAPLSIVTDRELALMKSLEAHFSDTPHLLCRWHVNMNVLAKSKKYFPKPTKKGNSYVRSPIFVEFLKQWNAVLAATSEETYKQEVAKLEAMAPKDAYIYVERT…	753	#N/A	#N/A	#N/A	#N/A	#N/A	#N/A	IPR018289 (PFAM); IPR052579 (PANTHER); cd07177 (CDD)	#N/A	hypothetical protein K3495_g3010 [Podosphaera aphanis]
aug-contig_11-processed-gene-46.199	MSIDFPKEENQILQRWKEIKAFERQLELSKNRPLYTFYDGPPFATGLPHYGHLLASTIKDIIPRYWSMRGYHVERRFGWDTHGLPIEHEIDKSFGISGKDAVMKLGLAKYNEECRAIVMRYSSEWRTMDTTFMESEWWIFKQIFDKGAVYQGHRVMPYSTVLTTALSNFEANQNYQEVTDPAVIVSFPLLEDQNTCLLAWTTTPWTLPSHTGLAAHPNFEYIKIHDLNSGKNYILLEKLLGTLYKDPKKAKFTIIERIMGSSMLGWKYEPLFDYFYEDFKDCGFRVLNATYVTDDSGVGIVHQAPAFGEDDYNVALEYGIISDTREPPNPVDERGYFTAKVREFSGQHVKSADKAIIKHLKGTGRLVLESQIRHSYPMCPRSDTPLIYRTVPSWFIRVT…	2109	Belongs to the class-I aminoacyl-tRNA synthetase family	P:GO:0006418; P:GO:0006428; F:GO:0000049; F:GO:0000166; F:GO:0002161; F:GO:0004812; F:GO:0004822; F:GO:0005524	P:tRNA aminoacylation for protein translation; P:isoleucyl-tRNA aminoacylation; F:tRNA binding; F:nucleotide binding; F:aminoacyl-tRNA deacylase activity; F:aminoacyl-tRNA ligase activity; F:isoleucine-tRNA ligase activity; F:ATP binding	K01870	map00970	Anticodon_1,tRNA-synt_1	IPR002301 (PRINTS); G3DSA:1.10.730.10:FF:000004 (FUNFAM); G3DSA:3.40.50.620:FF:000050 (FUNFAM); IPR002301 (NCBIFAM); IPR013665 (PFAM); IPR013155 (PFAM); IPR014729 (G3DSA:3.40.50.GENE3D); G3DSA:1.10.730.10 (GENE3D); IPR002300 (PFAM); PF19302 (PFAM); IPR023586 (PANTHER); IPR033709 (CDD); cd00818 (CDD); IPR009080 (SUPERFAMILY); IPR009008 (SUPERFAMILY); SSF52374 (SUPERFAMILY)	J	Isoleucine--tRNA ligase, cytoplasmic [Golovinomyces cichoracearum]
aug-contig_11-processed-gene-47.15	MRDPRFPNQSPITSVAGKGEILLKNLLSNLSEAGDIPMDTPAVPARSLPFPPLSKEEIQEELLRAGNTAPGADEIPSSIIKLAWPLIKDHIYSLFSGCTSLGHHPKCFRHATICMLQKPNKSDLSSPRFYTPIALLSVLGKGLERLLSKRLAWISTRYKLLTSQQFGALPCRPACEKITGTRMARQLLRWIESFVTDRTVQIRLDGETGPTQNITCGLPQGSPISPILFMLYISPLFRIGKPLMKFGFADDVAILATHKTLEENCTSISNSLKETLEWGQAEGIIFDPEKSELQHFSRRHKDKDHLSTPSITFGNGTVSKSVTHPYTRWLGVYFDKTLSFKWHVRILTGKAMKVANALRSLCNTSRGAPPILLRQAVIACVLPIALFASETWWPGTKKI…	638	reverse transcriptase	#N/A	#N/A	#N/A	#N/A	Exo_endo_phos_2,RNase_H,RVT_1	IPR000477 (PFAM); PTHR33481 (PANTHER); IPR000477 (PROSITE_PROFILES); cd01650 (CDD); IPR043502 (SUPERFAMILY)	#N/A	endonuclease/reverse transcriptase, partial [Blumeria hordei DH14]
aug-contig_11-processed-gene-47.16	MGVPALFRWLSQKYPKIVSQVIEEQPREIDGQIIPVDARGANPNDEEFDNLYLDMNGIVHPCSHPEDGPVPKNEEEMMMAIFKYTDRVVNMVRPRKLLMIAIDGVAPRAKMNQQRSRRFRSAQEAKEKAEDKAEFLKMLKSQGSGPEDTDVKKVWDSNEITPGTPFMDILAASLRYWISYKLNTDLAWSKIKVIISDSTVPGEGEHKIMEFIRSQRSSPEHNPNTKHVMYGLDADLIMLGLGTHEPHFRVLREDVFAQDSKPRVCKLCNQAGHEARECKGDVKIKDGNFDEKDSARPLKPFIWLHVSILREYLAAELFVPGQPFRFDLERALDDWVFMCFFVGNDFLPHLPSLEIRENGIDTLIAIWRDNLAVMGGYLTKDGQVDLGRAQIILRGLAKQ…	991	XRN 5'-3' exonuclease N-terminus	P:GO:0000956; P:GO:0006139; F:GO:0003676; F:GO:0003723; F:GO:0004527; F:GO:0004534; F:GO:0008270; C:GO:0005634	P:nuclear-transcribed mRNA catabolic process; P:nucleobase-containing compound metabolic process; F:nucleic acid binding; F:RNA binding; F:exonuclease activity; F:5'-3' RNA exonuclease activity; F:zinc ion binding; C:nucleus	K12619	map03008,map03018	XRN_N,zf-CCHC	G3DSA:3.40.50.12390:FF:000005 (FUNFAM); G3DSA:3.40.50.12390:FF:000003 (FUNFAM); G3DSA:1.25.40.1050:FF:000002 (FUNFAM); IPR004859 (PFAM); G3DSA:3.40.50.12390 (GENE3D); G3DSA:1.25.40.1050 (GENE3D); IPR017151 (PIRSF); IPR041412 (PFAM); IPR027073 (PANTHER); IPR001878 (PROSITE_PROFILES); cd18673 (CDD)	AL	hypothetical protein Golomagni_01609 [Golovinomyces magnicellulatus]
aug-contig_11-processed-gene-48.3	MRRLTQSTWGGSFVKSRLLYNALVRPALTYGCAIWGEAGPKGHIPERIVKPLRSLQRKCLKLITSAYNSTSSRVLEHETSTLPIEIYLKQRRIQHAGSSEKQPAQQTLRYALENIKLSACGRNILRAKNERNDLAEWRKISGIEENTKKQKEMLKIAAFQQWEHAWNNHAPKSHLSHRAPADPIKWHATNIKTDEKTKRLRMNHTGTPLAIHQLLKRAQSSIAIQIRSEHIGLNAYLYRRKVSEVDEPRCPCGYPSQNAKHMIMMCPQWTKGRGDVLRKAKNRTFEAIMESPEDIGRITKWIQGEGYIEQFRLTREVEAAAEKRGYV	327	#N/A	#N/A	#N/A	#N/A	#N/A	#N/A	#N/A	#N/A	hypothetical protein K3495_g6322 [Podosphaera aphanis]
aug-contig_11-processed-gene-49.144	MGHTDVPNDKSSQKDREENILMSNDNTMNEVIDFNSMDFDLNLEQTQVLITIPHDKQNAETLADTVTNFALPMLSDGQPSSKFILDTAATKHIISNRNLFSTYEKCKKTVNWGNAQSIDIIGTGTVHIQFTVNSQIYSLRDCLYMPELGINIISQSEMRDDFVSIFTKDKVIIKCQNMVIAHGQKINNLYYLSVNQVVFPRQRNTAQTHNSTTSEHALLNQTDINDLHARMGHISQNSIDKILDNTSGLHKIKNHDHIDLSTCEICLRGKFTNKINRACNQKSFEYLEKITSDICGPINPPTHDKYKYFITFMDVHSRYLEVKLLRSKDEAVDAFALYANIYENNANNKRIRILATDNGTEYTNKRLKTILNAKGIIHQLSPVYTKEPNGIIERVNRTI…	1124	transposition, RNA-mediated	P:GO:0015074; F:GO:0003676	P:DNA integration; F:nucleic acid binding	#N/A	#N/A	RVT_2,Retrotran_gag_2,rve	IPR013103 (PFAM); IPR054722 (PFAM); IPR025724 (PFAM); IPR036397 (G3DSA:3.30.420.GENE3D); IPR001584 (PFAM); IPR039537 (PANTHER); IPR001584 (PROSITE_PROFILES); cd09272 (CDD); IPR043502 (SUPERFAMILY); IPR012337 (SUPERFAMILY)	L	Retrovirus-related Pol polyprotein from transposon TNT 1-94 [Golovinomyces cichoracearum]
aug-contig_11-processed-gene-5.107	MLQVNQLTESLPTRDEALSIASQDLFSCGTEDQQKMISSEISSGKDEHSIKSSTCALPIPYIKPIMENLPIETESPLQCCKEFDVPLPLITQVRNIYVESLRRNRDKLYSFIKDTPISVSRLAEVDVILDDLRRLCDYSRLTMNDHSLQRQDLQIYEAKYAENISTKLIFIIELLTLLRPFKQSVIIIIRQDLIDVFEAIFQSHGFFYCRADLPEMICGIVENDLKITLLPTSNEIKNIQPANLIIAFDSSYSQFVHSKEFEKVIDIFKSSAFLLHLIIYRSVEHLEKTLEPTTDILYDKLRLLRLIYTVASNVGMLPREYPEPPNSARLITEYLQQYKTGALWPLPTVTGMDEDIENTEDEDISGLLELLEGFSEALHKVATIDSTPIKRLSECNSTE…	730	#N/A	#N/A	#N/A	#N/A	#N/A	HDA2-3	G3DSA:1.10.287.1490 (GENE3D); IPR038609 (G3DSA:3.40.50.GENE3D)	#N/A	hypothetical protein Golomagni_01057 [Golovinomyces magnicellulatus]
aug-contig_11-processed-gene-5.110	MEKGHHKFDCNFVDSEIESPPVRESRNDKLIKKPTVPRRNPKRTVSRSKKEILDPQAMVKLRKDILEPKAIALTKNKMLYNMSLLKTSDPHESYLSSEEDVSISDYSEEILFDSDDSDVDVKHDSSNSNSKSPGTTAKAISFHAAGRPNLIEISSHSSSNSSTPVASTPTRPKRPSLLRLPALTFTLGDFNLNDQEFFPPTTLSDKMKPNNSSPKKPHDVGLCMRSPDLKSFISEPETNNSFSLFRKDSIASTRFFNRQSLLHVPN	266	#N/A	#N/A	#N/A	#N/A	#N/A	#N/A	#N/A	#N/A	hypothetical protein GcM3_222025 [Golovinomyces cichoracearum]
aug-contig_11-processed-gene-5.95	MQSLLLFILYTFFLNVKADNLRLLTDISKISRYWGHLSPYSDNPATRFGVEYSGLPSGCQVESVQTLQRHADRFPTSGADDGGKIMNLGRKISDLRSSTSSDLFTGDLEFLNTWQNQLNTEGLLTGTGAVSEFAAGVDFWMRYGRILYNASNGQLAYDAKFPNGTDRPTVVLRTTDQSRMQNSLINWALGFFGSTITKSAQYFETVSQPFKVVTMPEEAEGKWNNTLASYISCTNTYSKPYIGYPGERLHNKYIPPYLSKATQRLQKYTPSGFNLTTFEVHAMQLLCAYETNFIGASTFCELFTEDEWAGFENSLDIKYYYDVVYGRPVGRAYGIGYVHEMFARLNHSLITSSSTSVNSSLTDKSETFPTNQAFHADFTHDTVILSTLAALSLDYFHSP…	542	Belongs to the histidine acid phosphatase family	F:GO:0003993	F:acid phosphatase activity	K01083	map00562	His_Phos_2	IPR000560 (PFAM); IPR029033 (G3DSA:3.40.50.GENE3D); PIRSR000894-1 (PIRSR); PTHR20963 (PANTHER); IPR000560 (CDD); IPR029033 (SUPERFAMILY)	#N/A	hypothetical protein Golomagni_04104 [Golovinomyces magnicellulatus]
aug-contig_11-processed-gene-51.17	MSTVGNRNSTPAESNNTSSLRPPSSRTISSGHHLRASADMAAFTLSPSTTRIRPSSDFYGSQINHSQTGSENDASDKIVQQWIADIDQYETTLEEMAAATLDLDFKDELSAIEQWFRVLTEAERTAALYALLQQTTQIQTRFFIQVLQQMGKNHPMSGVLSPANFDRDLMTNRLSDSMNKLSIDGSRNNHTRPPPTPSAKRHFGLDSSTINAMFPDAAAAIATEKAKFTQKTGNPPSSNHNNTSFESRATLATPTISGPVDTLENNNAPPPSPWGPRSNDQSAARPKSSSGQPPMGQFMQAPLSAGLRSPVTKITNNANQNSSTFNAPDTNHGDMPLLSPYNGNGNWASMVNTPLVNSFNNANSSTQVDMVANATAMKLAALSTVNNRFALDDVRKFRR…	619	Sterile alpha motif.	P:GO:0000289; P:GO:0043488; F:GO:0003729; F:GO:0005515; C:GO:0000932	P:nuclear-transcribed mRNA poly(A) tail shortening; P:regulation of mRNA stability; F:mRNA binding; F:protein binding; C:P-body	#N/A	#N/A	SAM_2	G3DSA:1.10.150.50:FF:000033 (FUNFAM); IPR013761 (G3DSA:1.10.150.GENE3D); IPR001660 (PFAM); IPR050897 (PANTHER); IPR001660 (PROSITE_PROFILES); IPR037635 (CDD); IPR013761 (SUPERFAMILY)	JT	hypothetical protein Golomagni_02173 [Golovinomyces magnicellulatus]
aug-contig_11-processed-gene-51.22	METQAQAAESLIDRASTKEESLRNAIRATELYMRAAGLAKLQSDKVRLRAKCQLLLSKAEEIKSSIEWSPKTNETSPLQLNPPTSSREISPQERRILLESSRLHGNLFPPWTSEPDDTLFEIPIEGETLYTYSILMSFPHAGPKIYSEPTQLSLSEKQKSIFGGWKRPFEHEGISRNVDWIMSSQNEIDLVQDVTTDCSVVASLCAIVSRASNDHGQLIASVFYPHNKSTMSPKISNSGKYIFRLQFNGCFRKVTIDDRLPKSNNNRSLHTLDRNNGRVIWPALLEKAYLKLYGGYDFPGSNSGTDLWIILGWIPEQVFLQSDFFETDHFWNRIYKAFGYGDVLITLGTGEFTQSEEKELGLVGKHDYAILDLKESNSKRQLLIKNPWCNGIVWQGKSK…	869	Belongs to the peptidase C2 family	P:GO:0006508; F:GO:0004197; F:GO:0004198	P:proteolysis; F:cysteine-type endopeptidase activity; F:calcium-dependent cysteine-type endopeptidase activity	#N/A	#N/A	Calpain_III,MIT,Peptidase_C2	G3DSA:2.60.120.380 (GENE3D); IPR001300 (PFAM); G3DSA:3.90.70.10 (GENE3D); PIRSR622684-1 (PIRSR); IPR051297 (PANTHER); IPR001300 (PROSITE_PROFILES); IPR001300 (CDD); IPR036213 (SUPERFAMILY); IPR038765 (SUPERFAMILY); IPR036213 (SUPERFAMILY)	OT	hypothetical protein Golomagni_04942 [Golovinomyces magnicellulatus]
aug-contig_11-processed-gene-52.4	MKSSHLRATGGEVGASSALAPKIGPLGLSPKKVGEDIAKATGDWKGLRVTVKLTIQNRQAAVSVVPSASSLIIKALKEPPRDRKKEKNIKHSKSITLDEVIEIARTMRFKSLSKDLKGVVKEILGTAFSVGCQVDGRSPKDISDDIKSGEIEIPDE	156	Belongs to the universal ribosomal protein uL11 family	P:GO:0006412; F:GO:0003735; F:GO:0070180; C:GO:0005840; C:GO:0015934; C:GO:0022625	P:translation; F:structural constituent of ribosome; F:large ribosomal subunit rRNA binding; C:ribosome; C:large ribosomal subunit; C:cytosolic large ribosomal subunit	K02870	map03010	Ribosomal_L11,Ribosomal_L11_N	G3DSA:1.10.10.250:FF:000002 (FUNFAM); G3DSA:3.30.1550.10:FF:000002 (FUNFAM); IPR036796 (G3DSA:3.30.1550.GENE3D); IPR020783 (PFAM); IPR036769 (G3DSA:1.10.10.GENE3D); IPR020784 (PFAM); IPR000911 (PANTHER); IPR000911 (HAMAP); IPR000911 (CDD); IPR036769 (SUPERFAMILY); IPR036796 (SUPERFAMILY)	J	60S ribosomal protein L12 [Golovinomyces cichoracearum] RKF82243.1 60S ribosomal protein L12 [Golovinomyces cichoracearum]
aug-contig_11-processed-gene-53.74	MASHRRGPWSQLEDAYLCQLVHSQGPLNWVRIASTIGSRSPKQCRERYHQNLKPTLNHEPISPEEGVQIERMVAAMGKRWAEIARRLQNRSDNAVKNWWNGSMNRRRRHFLRQKSSISSLHSHLSTQSHSYDERDHPKSLSQTRDMSTNLHASYSSHQSMSGAMTSPTVSEASRPESVEGAPSLVSDAGSALSFSPKTTNSPGLELPPISYQSLESRRPSLPGLPSQLNKLSPVIDNHSLKSGAFNFPNDLKIQTLSIYSLEHNQNYQQRYYCNPPTITNHPYVSKLPKFHEYSDLSVQLPPIRTGNQHEMPIQAAERDSRMHLSSLLG	329	Myb-like DNA-binding domain	P:GO:0000278; P:GO:0006355; P:GO:0045944; F:GO:0000978; F:GO:0000981; C:GO:0005634	P:mitotic cell cycle; P:regulation of DNA-templated transcription; P:positive regulation of transcription by RNA polymerase II; F:RNA polymerase II cis-regulatory region sequence-specific DNA binding; F:DNA-binding transcription factor activity, RNA polymerase II-specific; C:nucleus	K09425,K21769	map04218,map05166	Myb_DNA-binding	G3DSA:1.10.10.60 (GENE3D); G3DSA:1.10.10.60 (GENE3D); PF13921 (PFAM); IPR050560 (PANTHER); IPR001005 (PROSITE_PROFILES); IPR017930 (PROSITE_PROFILES); IPR001005 (PROSITE_PROFILES); IPR017930 (PROSITE_PROFILES); IPR001005 (CDD); IPR001005 (CDD); IPR009057 (SUPERFAMILY)	K	Transcription factor MYB24 [Golovinomyces cichoracearum]
aug-contig_11-processed-gene-54.150	MASSNNRVILRDGVSFTSWRADLQAELSSVDVLGHVFHNIRGIDPEIEPTEPTQVKGEDPEKLSQRMKEYKANLREWIKGEYKAQNLIIQRLEDSKRPQDYHRYTAKQLYEMVARANEVTNLLPHSEAFDAFVATKFTTTADEYVTRFLRNLQNVNNAADALTLQTTNNSYKFSEELAAVYFLKGTKHVKWLNVWRETKAVDVSQYAPLRHMIATLRATAGTRNNATEGYYNDDEESAVNPVAAVAKNTRNKNRIRCKNCRRIHDSKDCPKQNEDDMAQDSDDLCTLCRHEHANKDCYKQHPQRAPKRWLNQEASKGHHYGKAAISLSRNFDTSDENPDDDEDCFYLKAKK	351	#N/A	#N/A	#N/A	#N/A	#N/A	#N/A	#N/A	#N/A	hypothetical protein K3495_g2266 [Podosphaera aphanis]
aug-contig_11-processed-gene-55.18	MGLISDKSPRSSGLRSMRPKSSGADLENSTLANNSPEPAFKKRKYVPGGPGGGGRYFDEDGTEILAGRVRSDGYNLTSSRRRAGRQNTAMGSASGTYDQNDRCTRNRTRVPRSQTSSLRYSSAAQVAAVVQSDGYKPREERAWEEFHPNLDIDIPLLALSASVVEGQHELGSEKNFTSSQSGEKYSSAGTEASTPFDKKTGHFPLNMIDISSLRIPGTPGGGKRRPGRPPKDPIAFFAAKAAKLGKSFYHNTSKTPSNLPPVPNFKEKLTLPQPSYRKSNTLARFEDKTLGYARPVDEPMARVGYQESKKFLRPHRTLIKVSDFNLEDDLEFDPGDKSDCERKVPMGNCDIGRVEYDMDEQDDKWLDSYNAARRLAAIEIIQREIFEITITKIEKEWHN…	1071	Enhancer of polycomb-like	P:GO:0006357	P:regulation of transcription by RNA polymerase II	#N/A	#N/A	Bromodomain,EPL1,PHD_2,PWWP,zf-HC5HC2H_2	G3DSA:3.30.40.10:FF:000008 (FUNFAM); IPR013083 (G3DSA:3.30.40.GENE3D); IPR019787 (PFAM); IPR019542 (PFAM); IPR050701 (PANTHER); IPR019787 (PROSITE_PROFILES); cd15492 (CDD); IPR011011 (SUPERFAMILY)	#N/A	hypothetical protein Golomagni_02011 [Golovinomyces magnicellulatus]
aug-contig_11-processed-gene-55.22	MKSWAQIVTTPTADTPGTVILLHFDSKRYLVGNLAEGTQRASIQRKFGLIKTSDIFLTGTLSWGNAGGLLGMILTLADIRATSQEEKKVIIQKESSKTKKVQPQEKNPGLTIHGGRNLTHFLATSRRFIFRKGMPILTNEFTIKRDSQKSDWDPCWRDENIKVWAMVIEAEDEGLSKNEKKNVEMTSDIMSINREEDEFEMARKSVVSSMFDSTWRLDTLVKRKLSEVQLPATIFRRGENGKIQIYSGPTITEDSSVADLDVLVRNPWPGALVERLPSTTPSKSSTCFIIKNYPQRGKFNPQKAKELGVTPGPDFSRLTKGESIVTSTGTTVTPEMVLGKGKDGGGFAVLELPHTSYIEPLLARKEWSSETVMLGVGVILWILGPGVLNDPRIKDFMLK…	820	tRNase Z endonuclease	P:GO:0008033; P:GO:1990180; F:GO:0042781; C:GO:0005739	P:tRNA processing; P:mitochondrial tRNA 3'-end processing; F:3'-tRNA processing endoribonuclease activity; C:mitochondrion	K00784	map03013	Lactamase_B_2,Lactamase_B_4	IPR036866 (G3DSA:3.60.15.GENE3D); IPR036866 (G3DSA:3.60.15.GENE3D); IPR027794 (PFAM); IPR001279 (PFAM); IPR047151 (PANTHER); cd07718 (CDD); IPR036866 (SUPERFAMILY); IPR036866 (SUPERFAMILY)	#N/A	Ribonuclease Z 1 [Golovinomyces cichoracearum]
aug-contig_11-processed-gene-56.21	MDQSQSPPSTPLSKRLTRNQCIQIKTLHDAGMNQTKIATHLQISRKQVGHSLRRGSVTPKKARGRISSLSSEEVDKIEEFVKSPLENRQITYFELAHGEFKYLGVSDRVIKKELEKRGYNRHPAIEKPIISPEIKRKRKEWAEAHIDWTTEQWMSILRSDETWATDGHHSRRWITRRTGEEHEVSCVVMKIRKKIGWMFWACFAGYEKGPSLFWEKDWGNITSSSYAEKIVPLLHGMVRLRPGLSVMQDNAPSHVAARTMEEFEERSITPIVWPPYSPDLNAIEHVWKIMKDKIEFNYPNLAGGRRRSSDQIRAIVKEAWDSVSIQELTALIGSMHDRCQAVLDADGGPTKY	352	Encoded by	F:GO:0003676	F:nucleic acid binding	#N/A	#N/A	DDE_3,HTH_23,HTH_Tnp_Tc3_2	IPR038717 (PFAM); IPR036397 (G3DSA:3.30.420.GENE3D); IPR052338 (PANTHER)	#N/A	hypothetical protein K3495_g9501 [Podosphaera aphanis]
aug-contig_11-processed-gene-56.22	MEESLLLDFPNGECAPLPDSTIFSSEAEAFGWAQRQASTGGYAFSNLYKNKSKVTGDIILSCYNCDKGPKTYQNKPTTTSKSKQRDGTGSKKCGCQYKITIKPNESKKWVIIPKKSHNHGRNSSSIAHPAHRIAALQNTLRAEILNAANSGSSISQIMSAFREREGFNLIGKDISNIIQKERQKQLGGMTPLQWLLKELQDNGYNTRFETKDGNILSKLMYLHPQAIQLWKDHPDVLLMDCTYKTNRFNMPILNICGVTGGNKVIQLGLVFLSSEKENDYSWVLQQLKQIMTLEAIRAPLSIVTDRELALMKSLEAHFSDTPHLLCRWHVNMNVLAKSKKYFPKPTKKGNSYVRSPIFVEFLKQWNAVLAATSEETYKQEVAKLEAMAPKDAYIYVERT…	753	#N/A	#N/A	#N/A	#N/A	#N/A	#N/A	IPR018289 (PFAM); IPR052579 (PANTHER); cd07177 (CDD)	#N/A	hypothetical protein K3495_g3010 [Podosphaera aphanis]
aug-contig_11-processed-gene-57.102	MASTLELAIPSTTLFHDASTSKSYTLYNITLRLPLRTYVVQKRYSEFVSLNTALTAVTSCPPPVPLPGKTWFSSTKNSAKLTEDRRQGLEKYLRAIVEGPDRKWQETSVWRNFLNLPIKASGSDSKNNLVATIQRGLQAGQLTADPTVWLDVHREMKTQLHDARLFLGQRDGATTPHAQHVAGANAKKCLVKTGTLISDLEEGLKIMSELGNKNGEYTMGTGELRRRKDLLGSASVEREALEKLALSLAIKSQSLSAASGETDSMTPEKKELLLSSVSRKNGRVLGAPIAETDYTRELGNEGIVQLQKQMMENQDQDVEELAKIVRRQKEMGLAIYNELELQNEMLKKVDDGVDRVGMKINVAKKRASKIR	371	PhoX homologous domain, present in p47phox and p40phox.	F:GO:0035091	F:phosphatidylinositol binding	K08502	map04130,map04138	PX	G3DSA:1.20.5.110:FF:000058 (FUNFAM); G3DSA:1.20.5.110 (GENE3D); IPR036871 (G3DSA:3.30.1520.GENE3D); IPR001683 (PFAM); IPR000727 (PROSITE_PROFILES); IPR001683 (PROSITE_PROFILES); cd15858 (CDD); cd06897 (CDD); SSF58038 (SUPERFAMILY); IPR036871 (SUPERFAMILY)	U	Vacuolar morphogenesis protein 7-like protein [Golovinomyces cichoracearum]
aug-contig_11-processed-gene-57.103	MGESRQDLIAWLNNLLSLNITKVEQCGTGAALCQVFDSIYQDIPMSKVKFNVNTEYAYLQNFKILQNCFTRHAIERPINVEQLIKCKMQDNLELLQWTKRFWDQNFPGGEYDAVARRRASGAPPTTSSTTPKTSVMAGRRGATPTTLGRPTKGGLGIAALQQENNTLKENVQGLERERDFYFSKLRDIEILVQQADEEESEVEKGKDGDLISHIQAILYSTEDGFEIPNDAEGVDDHETF	240	EB1-like C-terminal motif	F:GO:0005515; F:GO:0008017	F:protein binding; F:microtubule binding	#N/A	#N/A	CH,EB1	G3DSA:1.10.418.10:FF:000028 (FUNFAM); G3DSA:1.20.5.1430:FF:000005 (FUNFAM); IPR004953 (PFAM); IPR001715 (PFAM); G3DSA:1.20.5.1430 (GENE3D); IPR036872 (G3DSA:1.10.418.GENE3D); IPR027328 (PANTHER); IPR001715 (PROSITE_PROFILES); IPR004953 (PROSITE_PROFILES); IPR036872 (SUPERFAMILY); IPR036133 (SUPERFAMILY)	Z	Microtubule integrity protein mal3 [Golovinomyces cichoracearum] RKF78374.1 Microtubule integrity protein mal3 [Golovinomyces cichoracearum] RKF81444.1 Microtubule integrity protein mal3 [Golovinomyces cichoracearum]
aug-contig_11-processed-gene-57.88	MDQPPPPPPHGQNPKSASSGLPPGNYDIFIIPPHSSGSGFLYLPSLKPNVNSFAAGFASALILVVVASALSPIAKIWWKSAKGADSAGVIIFMFAVAVGAWALGRIQAEKGTQSNQNRSNSHTYEDGNGPNWNRGTDSRSKSSNSYKFSHENDSSAGSRPDAEPTPGPNERSSRSSQWQYQPETSSPEADSASAAEDTKEKSRDEAKKKEQMRQDRLRKEQEKQEQQRREQEKQENQRREQERLEQERLERKRREQEKQEKQEKQEKHRREQERLERKRREQEKQEKHRREQERQEQEKQEKQRREQERLERERREQERLERERREQERLEQEKQEKQKREQERLDRERREQERLEQEKQEKQKREQERLDRERREQERLEQEKQEKQKREQERLDRER…	961	#N/A	#N/A	#N/A	#N/A	#N/A	#N/A	#N/A	#N/A	hypothetical protein Golomagni_00434 [Golovinomyces magnicellulatus]
aug-contig_11-processed-gene-57.89	MRRTISSCPRAEEIWFGLRIKETTWQSGGKSAKKKTIYTETERDNENSSFSAVRTRLGQARAKGGRESSSTSGSGNMACGKHYHRRQNRKSPNQIHRNAIRHPPSAIHQNLTRAQSSIAIQISNEHVGLNAYLYLRKVPGVDEPRCQSGYLSQNAKHMVMVCPQWAQGKGDVLRKATNRSFEAILNSLEDVARITKGKQTEGWIEQFRLTREVEAAVEERGQAKR	225	#N/A	#N/A	#N/A	#N/A	#N/A	#N/A	#N/A	#N/A	hypothetical protein K3495_g12665 [Podosphaera aphanis]
aug-contig_11-processed-gene-58.17	MHTFTVAFISTLLLSPISVMSHFQNKDTDVDHLQSPRPSDSLTVSIMIKYDGEDRAKTCRVRKEDEEEEEREEKGEVKEENEEEEEEEEEEREKINEKKKGKKKAKYICHKVHRCKKKSKLCYGDSIKAKDGFRCDGKFIKFTKVLSRANGACDRLKSKSDRKLPALYTATDYKLADGPYFEWPIYSKFWNLGESKTNLAETIRN	205	#N/A	#N/A	#N/A	#N/A	#N/A	#N/A	#N/A	#N/A	hypothetical protein Golomagni_00854 [Golovinomyces magnicellulatus]
aug-contig_11-processed-gene-58.7	MPALSPTMTEGNIAKWNVKEGDSFSAGDVLLEIETDKASMDVEAQDDGILAKIIQADGCKGIKVGTLIGILAEAGDDLNTLNLPLEEPAKPKSPQRKLSNPEAKSSHQTNSSSNPIMSHTSQSGNSFSSGRNQSHPLLPSVQILMRLHNLDASAIKNMTPTGPNNRLLKGDVLAYLGHISASYPAQLSSKISNLSHLDLSNIKIREPPPAPKVIEAVKSSSPEPKTTVSLEQTVSLKNVHVIQEKMRDLLGVSLAEDTFIFRATKIANENLPLPKSYKASPNELFESILGLRKNSLTNSLKSRPFSPTIFNVPSASISPILRPAKSKNYDIIDILSGKKVIKLKTNKLVESEQKTFKLEVAKEEEERARIFLDKIKTTLESRPGSLVL	388	e3 binding domain	P:GO:0006086; F:GO:0004742; F:GO:0016746; C:GO:0005967; C:GO:0045254	P:pyruvate decarboxylation to acetyl-CoA; F:dihydrolipoyllysine-residue acetyltransferase activity; F:acyltransferase activity; C:obsolete mitochondrial pyruvate dehydrogenase complex; C:pyruvate dehydrogenase complex	K00627	map00010,map00020,map00620,map01100,map01110,map01120,map01130,map01200	Biotin_lipoyl,E3_binding	G3DSA:2.40.50.100:FF:000010 (FUNFAM); IPR036625 (G3DSA:4.10.320.GENE3D); IPR000089 (PFAM); G3DSA:2.40.50.100 (GENE3D); IPR045257 (PANTHER); IPR000089 (PROSITE_PROFILES); IPR004167 (PROSITE_PROFILES); cd06849 (CDD); IPR036625 (SUPERFAMILY); IPR011053 (SUPERFAMILY)	C	hypothetical protein Golomagni_01068 [Golovinomyces magnicellulatus]
aug-contig_11-processed-gene-59.24	MDTEDGKFFIKNLAQFVRTHEKALANGLQMKQQPNVRNYQSIRPSENSCTTSNLSSKPSVSSNSACSTPSSIAATLSLPSIAFTNENIKVAKLALTPHHLFYLLSRFEELGIIVGPMNVRLENLQAEVSSGNYVSFLNQHQRPNSGRCSDHGSIHSVSSVRSVFSGMTSLWANLSLGSAGNTARTEKQKAITEVDLKYLYASFTKIPCLRLAPDQRARLIKGYEEFPFDTAVPLIVFKNLSALEISDIDIRNFFGWDKLAEQLRSLTIKRAGVSDPEDLLINIVLDDMDRRRRRSSRQQSSLSVAVSPKRSTTIHKCESIELNSEPGSPNDQAHHEIFTRPRRESLAQSGSISSAYSNKGRPRRFSPVRPSSSRNGHHYLRDSYYTQRLDIRDNYIKDP…	667	Leucine rich repeat domain-containing protein	#N/A	#N/A	#N/A	#N/A	LRR_8	#N/A	#N/A	putative leucine-rich repeat-containing protein [Golovinomyces cichoracearum]
aug-contig_11-processed-gene-59.30	MRSLLALFVTSLLLLDPVYSKVLPATDHHLNSRSGIARILVKEDFFEQDSEATGVCLKHEAPCPFKRNLRYGFKCKNKFFNKAKVMAAANRACPLIESNRQSGGFPKPHIDRKNSEKDGLLEWPINKTWWFMGLFRSYQHRLLMTTDCVVVGATTRNRKGEGYTDCKQRRH	171	#N/A	F:GO:0003723; F:GO:0004540	F:RNA binding; F:RNA nuclease activity	#N/A	#N/A	#N/A	G3DSA:3.10.450.30 (GENE3D); IPR016191 (SUPERFAMILY)	#N/A	putative secreted effector protein [Golovinomyces cichoracearum]
aug-contig_11-processed-gene-61.14	MADTSIFNTRAPYHITCFGILTGTQFFQSFVGSIIAYKTLPRPQFSQLQQKTFPVYFSLQAALPFLLALTYPGSRSKASGIEGVLKGKRGVLVPLTITFVTSLLNLFLVGPATTSVMRERKVQETRDGKKYFDPAPQSEEMQKLNRQFGIWHSLSSLLNLAGFISTIGASPAKAVEIPINQNQQEETNKFQKAISAWRNIDLTSLIPSLDSTASEIIQYQRDSTLQRKELSQRTKEFRKLNDASKLVEIRALLKNYQSFIDLLTNHIKSTNSAYLSVYSSLSEAPDPYPLLEASVDSLLLSEETLPKVLSENKDLQKSVRNFTAQLEETESKLEAERSLRISSEEKIESKVKEVEAAWAEVLEEKKDDWEAKEKFLEEKIESQERLINEIKASYEVSRR…	877	CASP C terminal	P:GO:0006891; C:GO:0000139	P:intra-Golgi vesicle-mediated transport; C:Golgi membrane	#N/A	#N/A	CASP_C	IPR012955 (PFAM); IPR025423 (PFAM); PTHR14043 (PANTHER)	K	Protein CASP [Golovinomyces cichoracearum]
aug-contig_11-processed-gene-61.15	MEESLLLDFPNGECAPLPDSTIFSSEAEAFGWAQRQASTGGYAFSNLYKNKSKVTGDIILSCYNCDKGPKTYQNKPTTTSKSKQRDGTGSKKCGCQYKITIKPNESKKWVIIPKKSHNHGRNSSSIAHPAHRIAALQNTLRAEILNAANSGSSISQIMSAFREREGFNLIGKDISNIIQKERQKQLGGMTPLQWLLKELQDNGYNTRFETKDGNILSKLMYLHPQAIQLWKDHPDVLLMDCTYKTNRFNMPILNICGVTGGNKVIQLGLVFLSSEKENDYSWVLQQLKQIMTLEAIRAPLSIVTDRELALMKSLEAHFSDTPHLLCRWHVNMNVLAKSKKYFPKPTKKGNSYVRSPIFVEFLKQWNAVLAATSEETYKQEVAKLEAMAPKDAYIYVERT…	753	#N/A	#N/A	#N/A	#N/A	#N/A	#N/A	IPR018289 (PFAM); IPR052579 (PANTHER); cd07177 (CDD)	#N/A	hypothetical protein K3495_g3010 [Podosphaera aphanis]
aug-contig_11-processed-gene-61.22	MEAMLVDMPELDPKITAARDSFETSDQLEINNLIQQGVFEFMKYDQKTHSGARFFKSRFVREIKHDSEGKPYEKSRLVIQGYGDEEKKDILTQSSTIQRASQRLICAIAPTIMKMINADIYLRDITQAYVQSTMALNRTIYAKLPKELISKYEPGTVMRVIKPLYGIAESGLFWWVTYHRHHIEEMAMMTSTFDPCLLVTDFNKVPGNECFGVIAMQTDDTLILASPNFNDLEEIKLAKANFMAKPKTKLTTDQKLQFNGCTLIISNGTLIIRQKGQGTKLELVPEKDKDFQKIYVQQRARGAYIASICQPEASYDLSKATQTTNPDKIDCAELNKRLMWQMNNLNRGIKYIDLNLHEAALYIFVDGSFANNKDLSSQIGYVIYLANEQKISSDYPAFK…	552	Encoded by	#N/A	#N/A	#N/A	#N/A	RVT_2,rve	IPR013103 (PFAM)	L	RVT-2 domain containing protein [Pyrenophora tritici-repentis]
aug-contig_11-processed-gene-61.24	MTRKHERAAKLMRTLQSDCFTGTTMFSLSKYLPFSASTTSTHAWTYLLAVCLFSISFLVFVNAASSFVITDLIGVKGGVGDLVGTLGLVDELVALIACPFWGILSDRIGVRYVCVAGYVIIGLSLFIFVQARNVYPHLLIIRAIFSIGGAATSTMVTGILPTISGGDIVEENEIPISKKLQSDQQQRATQPSDLQTTLTKFNCNNSSNYSGETSNSVSLNDHTALTTRSNPQRLAGLVGFFTGCGALVALTLFLPLPAQFSRIKEITQAQAISDSFYVVGVVSLVVACICFFGLKGMSGEEGKGYHCTFLRKPTSATGYQTLPSSQINDENIHQVPHCLPYWHLLLDSAKLGFTDPDIGLAYVGGFVARASSVGISLFIPTYVNTYFIHHGFCNISPTD…	994	Major Facilitator Superfamily	F:GO:0003676	F:nucleic acid binding	#N/A	#N/A	#N/A	IPR036397 (G3DSA:3.30.420.GENE3D); IPR038717 (PFAM); IPR036259 (G3DSA:1.20.1250.GENE3D); IPR036259 (G3DSA:1.20.1250.GENE3D); PTHR23524 (PANTHER); cd06174 (CDD); IPR036259 (SUPERFAMILY); IPR036259 (SUPERFAMILY)	#N/A	hypothetical protein Golomagni_05386 [Golovinomyces magnicellulatus]
aug-contig_11-processed-gene-62.105	MEESLLLDFPNGECAPLPDSTIFSSEAEAFGWAQRQASTGGYAFSNLYKNKSKVTGDIILSCYNCDKGPKTYQNKPTTTSKSKQRDGTGSKKCGCQYKITIKPNESKKWVIIPKKSHNHGRNSSSIAHPAHRIAALQNTLRAEILNAANSGSSISQIMSAFREREGFNLIGKDISNIIQKERQKQLGGMTPLQWLLKELQDNGYNTRFETKDGNILSKLMYLHPQAIQLWKDHPDVLLMDCTYKTNRFNMPILNICGVTGGNKVIQLGLVFLSSEKENDYSWVLQQLKQIMTLEAIRAPLSIVTDRELALMKSLEAHFSDTPHLLCRWHVNMNVLAKSKKYFPKPTKKGNSYVRSPIFVEFLKQWNAVLAATSEETYKQEVAKLEAMAPKDAYIYVERT…	753	#N/A	#N/A	#N/A	#N/A	#N/A	#N/A	IPR018289 (PFAM); IPR052579 (PANTHER); cd07177 (CDD)	#N/A	hypothetical protein K3495_g3010 [Podosphaera aphanis]
aug-contig_11-processed-gene-62.112	MDADEMSMELEPLSMDLWSSPSLKISRKTIPTTLNEMDIPFCISEDYSSLPTWDSSKIPFQSLQKNLSQTYSVPQDYFMSTYSGEIGWNSKSYDEEFDLHNFDSEMNLVTEAQEYTTDEYPLIMGIKFPDSGMETDQFGARGLYNSNNNNKNNRRVSGSSFTMSSTGQPLDMQSYDEFSKSLSDSTTFSSDQLLHSSNRNSLMSSSQLSPVVSPLMIPQNQSDPSWSQKKSRESPCSRSNKLSTKYNADSNLNKRWSTGSYALVSNRRTSPFIYQKSHEIPTSNVNLISSRHSSPILPNEQQLFNASDFHQTQPHPLSIPDNNNNNYQPENFEYQPNNMLVPSQTYDGVSFLENQPPTISHGLFRMLQSNADIHSLQSNFTDLYELPDLYASLRKDYVP…	607	Domain of unknown function (DUF4451)	#N/A	#N/A	#N/A	#N/A	DUF4451	IPR028012 (PFAM); PTHR28125 (PANTHER)	#N/A	hypothetical protein GcM3_036006 [Golovinomyces cichoracearum]
aug-contig_11-processed-gene-63.117	MLQIAAFQQWENLWKNHEPKQHLCHRAPADLEIWKAANITTDQKTGRIRMNLKETPSAIHQNLKRAQSSIAIQIISEHIGLNAYLHRRKVPGVEDPRCQCGYSSQNAKHMVMVCPQWAQGRGGVLRKAKNRSFEAMMDSPEDVARITQWIEREGWIEQFRLTRAVETVMEEMGTGERYDGNHMGYRSKIALPVVRLRNKAESK	203	#N/A	#N/A	#N/A	#N/A	#N/A	#N/A	#N/A	#N/A	hypothetical protein EV44_g3156 [Erysiphe necator]
aug-contig_11-processed-gene-64.140	MSDPTKPESSTTTGTQKQKQSYVNDFIKLKIDEFTTLNFKDDNLWEAYQDEFLAFTFDDFKAAFISILRSLRIFLRSRGVWVKRDRNTTLATSLYNTLKESSPTEWTAEEINKSNEVFDSVKIFHITKTQKALLKATSEQQSQPAPSKMLNIQSNICQEKHQPGSRKTNQSYGYGKELSILSNIFFELCDKAEIPEQLYAKAFSTMLSGAALQHYYTTSSNSLRRDFETLTSATRNHFEGPEIENTIPILKEITKLDTNLIIIHHQQKEDATYANVQIVTLNTTQSLNKMKLKGSLRDDLLNVSITLYPSTRQILKAIQWKFCEESDNDGTFMTSFGQIEEPKEIARKLADHSFAHAINKDTRIPTENINGASKYSTAGYKQLQAFNKIYPSTLDKSKS…	1433	Encoded by	P:GO:0015074; F:GO:0003676	P:DNA integration; F:nucleic acid binding	#N/A	#N/A	#N/A	IPR013103 (PFAM); IPR036397 (G3DSA:3.30.420.GENE3D); IPR036397 (G3DSA:3.30.420.GENE3D); IPR050951 (PANTHER); IPR001584 (PROSITE_PROFILES); IPR012337 (SUPERFAMILY); IPR012337 (SUPERFAMILY)	#N/A	hypothetical protein K3495_g12593, partial [Podosphaera aphanis]
aug-contig_11-processed-gene-64.143	MEESLLLDFPNGECAPLPDSTIFSSEAEAFGWAQRQASTGGYAFSNLYKNKSKVTGDIILSCYNCDKGPKTYQNKPTTTSKSKQRDGTGSKKCGCQYKITIKPNESKKWVIIPKKSHNHGRNSSSIAHPAHRIAALQNTLRAEILNAANSGSSISQIMSAFREREGFNLIGKDISNIIQKERQKQLGGMTPLQWLLKELQDNGYNTRFETKDGNILSKLMYLHPQAIQLWKDHPDVLLMDCTYKTNRFNMPILNICGVTGGNKVIQLGLVFLSSEKENDYSWVLQQLKQIMTLEAIRAPLSIVTDRELALMKSLEAHFSDTPHLLCRWHVNMNVLAKSKKYFPKPTKKGNSYVRSPIFVEFLKQWNAVLAATSEETYKQEVAKLEAMAPKDAYIYVERT…	753	#N/A	#N/A	#N/A	#N/A	#N/A	MULE	IPR018289 (PFAM); IPR052579 (PANTHER); cd07177 (CDD)	#N/A	hypothetical protein K3495_g3010 [Podosphaera aphanis]
aug-contig_11-processed-gene-65.150	MLCSLVLTIFLFIFQLSISTPLHAFSYKYTLHTLRVRSSWLDARDASGCDLKNAHVTTDASSPLPPPSEEFVAKHIAIGRGTQNYNCKKDPTDAPVSIGALALLYNASCIASEDPTTLSQLPSAALKLQLPKDKTQTFTSSNLAVSGYHFFPDPKTPVFDLRSAEDDLGSVIPKKNGTAPPPPDSIAGQNNIGDGAVSWLKLVASSGELREVYRVNTAGGNPPKTCLGMPATFSVQYSAEYVTSL	245	Protein of unknown function (DUF3455)	#N/A	#N/A	#N/A	#N/A	DUF2990,DUF3455	IPR021851 (PFAM); PTHR35567 (PANTHER)	#N/A	hypothetical protein Golomagni_04969, partial [Golovinomyces magnicellulatus]
aug-contig_11-processed-gene-66.17	MEPSRGDMAAVGKPRLLLMGMRRSGKSSISSVVFQKMPPHETIFIESTSRLQKDSMLSFLDFQVWDFPGQIDFLDPSFDLDAIFGEIGALIWVIDAQDDYLEAVARLNSTILNLQPQYPNVNIEVFIHKVDGLSSDYKLDVQRDIVQRIQDELSDNGIEDADINFHLTSIYDHSIFEAFSKVIQKLIPHLSTLEALLNNLCRSSGFEKCYLFDVLSKIYVATDSSPMDMPSYEICSDFIDVMVDLAEIYGWARPQSYIEKLEGPPWRKPIKDQVACQEVEACCVLSDGKRPIILREANQYLALVSVAREGTYCKLPAVIENINVTVEGLLEVFEITRQARRLPKETSFTGGDGVDQVETGEIDKRSRRF	369	Gtr1/RagA G protein conserved region	P:GO:0009267; P:GO:0010507; P:GO:1904263; F:GO:0003924; F:GO:0005525; C:GO:0000329; C:GO:0005634; C:GO:1990131	P:cellular response to starvation; P:negative regulation of autophagy; P:positive regulation of TORC1 signaling; F:GTPase activity; F:GTP binding; C:fungal-type vacuole membrane; C:nucleus; C:Gtr1-Gtr2 GTPase complex	K16186	map04140,map04150	Gtr1_RagA	G3DSA:3.40.50.300:FF:000643 (FUNFAM); IPR006762 (PFAM); G3DSA:3.30.450.190 (GENE3D); IPR027417 (G3DSA:3.40.50.GENE3D); IPR006762 (PANTHER); IPR039400 (CDD); IPR027417 (SUPERFAMILY)	U	GTP-binding protein gtr2 [Golovinomyces cichoracearum]
aug-contig_11-processed-gene-66.8	MIDSMDISQESQAFPTESSHQLPPIPPIPSIPISPPIISSPPPPINLEIPTKTVDGRQILKPVAPSKRPLTENPQRKSRENSDIANAFLQQELTDIIATRQRRERAWHARLLICTTMISSIESTLINFTEELEIEEVMAFKAYLRQAIANFAVADSSPSPPYIPTHTRLSKGNVNSTSKDKNSKKVVVATPCIVLPLAPNKKPTQEVVQPSIPKTSDKSWASVARNGQKKARVFASNKTQDAPRPKFRSANYPKTSLQLLAPTRDFLFAILKTMNGGNYLLLEYVRW	287	#N/A	#N/A	#N/A	#N/A	#N/A	#N/A	#N/A	#N/A	putative eka-like protein [Erysiphe necator]
aug-contig_11-processed-gene-67.6	MSGSTHAMAQQASQQQHLRSQQPNPQTAQIQQYIYNALNSQPALLSGWQSGVPKNTRLSLIFNIIGGLRHASHHQPGNPATIQKLIETALKFERECFVTALSKDGYERVIQKKLEHLQEKRNQQISNLQPGMPLQSQIQSQQILVNHNGIQAPRLMPTTSDQQVFSQLQQQAQSSAISGSQLQPSSMGMQGTSKNPLSNPRFQMMQQQQQQQQQKQQQQQQQQQQQQQQQPSQLNALGSSGVKNFSPQENAILIELTNQMISRTSEEAKNEMRAKLQRNLRPEILQRCRAQGLDPVIAWFRHMASDKLLNERNRIAQQQLQNAQQAQSLISGSPLQLSRSMQSNSMVGQAPPSNLGVGANPSFNNFMGSVDVAAHQQQQGVIAQAKGQVVVPASSIPNT…	1552	KIX domain	P:GO:0006355; F:GO:0003712	P:regulation of DNA-templated transcription; F:transcription coregulator activity	#N/A	#N/A	KIX_2,Med15_fungi	IPR036546 (PFAM); IPR036529 (G3DSA:1.10.246.GENE3D); IPR003101 (PROSITE_PROFILES); IPR036529 (SUPERFAMILY)	A	hypothetical protein GcC1_000001 [Golovinomyces cichoracearum]
aug-contig_11-processed-gene-68.10	MEKKRHPSSFQQLEKLGEGTYATVFKGRNRQTGDLVALKEIHLDSEEGTPSTAIREISLMKELKHKNIVSLHDVIHTENKLMLVFEYMDKDLKKYMDTHGERGALPPATIKSFMHQLLLGIEFCHANRVLHRDLKPQNLLINTKGQLKLADFGLARAFGIPVNTFSNEVVTLWYRAPDVLLGSRTYNTSIDIWSAGCIMAEMYTGRPLFPGTTNEDQLARIFRIMGTPSERTWPGISQYSEYNNNFQIYATQDLRNILPQIGMNGIDLLQRMLQLRPERRISAFDALQHPWFTDMNNQMNSQMSIQMNNQMNGQLSSQMNNQMNSQMNNQMNNQINAQLNNQLNNQISNQINNQLRQPQQHQIGHHQVSRDYPPHGMMGHNDYGY	385	Belongs to the protein kinase superfamily	P:GO:0000083; P:GO:0006468; F:GO:0004672; F:GO:0004674; F:GO:0004693; F:GO:0005524; C:GO:0005634; C:GO:0005737	P:obsolete regulation of transcription involved in G1/S transition of mitotic cell cycle; P:protein phosphorylation; F:protein kinase activity; F:protein serine/threonine kinase activity; F:cyclin-dependent protein serine/threonine kinase activity; F:ATP binding; C:nucleus; C:cytoplasm	K06655,K08282	map04111,map04138	Pkinase	G3DSA:3.30.200.20:FF:000062 (FUNFAM); G3DSA:1.10.510.10:FF:000410 (FUNFAM); G3DSA:1.10.510.10 (GENE3D); G3DSA:3.30.200.20 (GENE3D); IPR000719 (PFAM); PIRSR000661-50 (PIRSR); PIRSR000550-3 (PIRSR); PIRSR000660-2 (PIRSR); PIRSR038172-1 (PIRSR); PIRSR037281-1 (PIRSR); PIRSR500950-50 (PIRSR); PIRSR637770-2 (PIRSR); PIRSR000554-2 (PIRSR); PIRSR630220-2 (PIRSR); PIRSR000660-1 (PIRSR); PIRSR500947-50 (P…	T	Negative regulator of the PHO system [Golovinomyces cichoracearum]
aug-contig_11-processed-gene-68.11	MTEPESKPNTQTPSISEKESNLFTKTYDTSSQLTPDSPSSEFFKTPSHSSHSMTAPLSRNASFSETSSYQEDWEAFSNMDRLTVFDLLDNFALTQQLEKFQRNLSLQTEKVRKQKEALKCRGSYAKELVVEEWRKRVPSTDEQLEKYLKLMRENVDKLGSHWNDTRAITFREKISFICGVLNVLISGYLIGAYPDFFHIWYTLQLFYFMPIRYYTYQKQGHHYFLADLCYFVNFMCMMAIWVFPNSKRLFISSYCLAFGNNAIAIAMWRNSLVFHSFDKVTSLFIHIMPCVSLHCLVHLLPQELQHRRFNAVWTIKNSASGSSGYYSLFDMALWSTIPYVIWQLSYHLLITVRRREKIAAGRPTSFTWLRKSYSKVWIGKIVLSLPEYLQEPVFMGIQY…	519	Protein of unknown function (DUF2838)	P:GO:0006656	P:phosphatidylcholine biosynthetic process	#N/A	#N/A	DUF2838	IPR021261 (PFAM); IPR021261 (PANTHER)	#N/A	putative membrane protein [Golovinomyces cichoracearum]
[truncated: 6,549 more rows]

## Sheet: Additional File 5
Table S5. Protein sequence similarity among duplicated genes of Golovinomyces ambrosiae related to MULE-MuDR transposases. A BLASTp vs all search was performed on the final protein sequence dataset of predicted genes with a maximum of five hits per sequence to identify duplicated genes. Sequences presented in this table all harbor a zinc-finger SWIM and a MULE related domain according to HMMER.
[truncated: 1,207 more rows]
